# Supplementary material for: Effect of the Interaction between Elevated Carbon Dioxide and Iron Limitation on Proteomic Profiling of Soybean
Source: Int J Mol Sci. 2022 Nov 7;23(21):13632. doi: 10.3390/ijms232113632 (PMC9654904; doi:10.3390/ijms232113632)
Supplement: Supplementary file 1 [file ijms-23-13632-s001.zip › Supplementary Material_tables.xlsx]

## Sheet: TABLE S1
Table S1 - Proteins identified in root tissues of soybean plants under eCO2 and Fe-limitation
Master	Accession	Description	Exp. q-value: Combined	Sum PEP Score	Coverage [%]	# Peptides	# PSMs	# Unique Peptides	# AAs	MW [kDa]	calc. pI	Score Sequest HT: Sequest HT	# Peptides (by Search Engine): Sequest HT	Chromosome	# Razor Peptides	Abundance Ratio: (C_Fe_minus_CO2_elevated) / (A_Fe_plus_CO2_elevated)	Abundance Ratio: (D_Fe_minus_CO2_ambient) / (A_Fe_plus_CO2_elevated)	Abundance Ratio: (A_Fe_plus_CO2_elevated) / (B_Fe_plus_CO2_ambient)	Abundance Ratio: (C_Fe_minus_CO2_elevated) / (B_Fe_plus_CO2_ambient)	Abundance Ratio: (D_Fe_minus_CO2_ambient) / (B_Fe_plus_CO2_ambient)	Abundance Ratio: (C_Fe_minus_CO2_elevated) / (D_Fe_minus_CO2_ambient)	Abundance Ratio Adj. P-Value: (C_Fe_minus_CO2_elevated) / (A_Fe_plus_CO2_elevated)	Abundance Ratio Adj. P-Value: (D_Fe_minus_CO2_ambient) / (A_Fe_plus_CO2_elevated)	Abundance Ratio Adj. P-Value: (A_Fe_plus_CO2_elevated) / (B_Fe_plus_CO2_ambient)	Abundance Ratio Adj. P-Value: (C_Fe_minus_CO2_elevated) / (B_Fe_plus_CO2_ambient)	Abundance Ratio Adj. P-Value: (D_Fe_minus_CO2_ambient) / (B_Fe_plus_CO2_ambient)	Abundance Ratio Adj. P-Value: (C_Fe_minus_CO2_elevated) / (D_Fe_minus_CO2_ambient)	Abundances (Grouped): A_Fe_plus_CO2_elevated	Abundances (Grouped): B_Fe_plus_CO2_ambient	Abundances (Grouped): C_Fe_minus_CO2_elevated	Abundances (Grouped): D_Fe_minus_CO2_ambient	Abundances (Normalized): F13: Sample, n/a, A_Fe_plus_CO2_elevated	Abundances (Normalized): F17: Sample, n/a, A_Fe_plus_CO2_elevated	Abundances (Normalized): F21: Sample, n/a, A_Fe_plus_CO2_elevated	Abundances (Normalized): F14: Sample, n/a, B_Fe_plus_CO2_ambient	Abundances (Normalized): F18: Sample, n/a, B_Fe_plus_CO2_ambient	Abundances (Normalized): F22: Sample, n/a, B_Fe_plus_CO2_ambient	Abundances (Normalized): F15: Sample, n/a, C_Fe_minus_CO2_elevated	Abundances (Normalized): F19: Sample, n/a, C_Fe_minus_CO2_elevated	Abundances (Normalized): F23: Sample, n/a, C_Fe_minus_CO2_elevated	Abundances (Normalized): F16: Sample, n/a, D_Fe_minus_CO2_ambient	Abundances (Normalized): F20: Sample, n/a, D_Fe_minus_CO2_ambient	Abundances (Normalized): F24: Sample, n/a, D_Fe_minus_CO2_ambient	Found in Sample: [S13] F13: Sample, n/a, A_Fe_plus_CO2_elevated	Found in Sample: [S17] F17: Sample, n/a, A_Fe_plus_CO2_elevated	Found in Sample: [S21] F21: Sample, n/a, A_Fe_plus_CO2_elevated	Found in Sample: [S14] F14: Sample, n/a, B_Fe_plus_CO2_ambient	Found in Sample: [S18] F18: Sample, n/a, B_Fe_plus_CO2_ambient	Found in Sample: [S22] F22: Sample, n/a, B_Fe_plus_CO2_ambient
Master Protein	A0A0R0JMI0	Glutamine amidotransferase type-2 domain-containing protein OS=Glycine max OX=3847 GN=100819513 PE=4 SV=1	0	1316.37	62	101	864	19	2185	239.4	6.57	2271.29	101	6	82	2.764	4.741	0.358	1.01	1.474	0.606	0.0734685	0.0182699	0.0373823	0.992912	0.38853	0.13038	44.6	105.2	109.4	140.7	1.2777e+08	1.31282e+08	1.24488e+08	2.58097e+08	3.15944e+08	3.01231e+08	1.6793e+08	3.63115e+08	3.13369e+08	5.23458e+08	3.32312e+08	4.02886e+08	High	High	High	High	High	High
Master Protein	I1KU21	Tr-type G domain-containing protein OS=Glycine max OX=3847 GN=100804251 PE=4 SV=1	0	1302.48	76	54	2333	54	843	94	6.11	6009.81	54	8	0	1.007	1.199	0.995	1.002	1.086	0.887	0.89696	0.989464	0.91204	0.99582	0.983775	0.980623	111.4	96.1	92.2	100.4	3.56921e+09	3.72821e+09	3.25556e+09	3.3376e+09	3.07701e+09	2.7178e+09	2.86667e+09	3.17823e+09	2.95206e+09	4.15661e+09	3.21561e+09	2.57103e+09	High	High	High	High	High	High
Master Protein	A0A0R0KBX5	Glutamine amidotransferase type-2 domain-containing protein OS=Glycine max OX=3847 GN=100815931 PE=4 SV=1	0	1163.36	58	96	785	13	2191	240.1	6.81	1932	96	4	3	1.775	2.435	0.584	0.954	1.612	0.602	0.765568	0.69884	0.777246	0.99582	0.237158	0.2198	58.7	93.4	103.3	144.5	1.02203e+07	1.76692e+07	9.89177e+06	1.49067e+07	1.81368e+07	1.62737e+07	9.23855e+06	1.8002e+07	1.87005e+07	2.86024e+07	1.89225e+07	2.51786e+07	High	High	High	High	High	High
Master Protein	A0A0R0KKU3	Uncharacterized protein OS=Glycine max OX=3847 GN=100798307 PE=3 SV=1	0	1154.79	80	49	2810	3	653	71.4	5.16	6535.54	49	3	58	0.998	1.02	0.916	0.9	0.879	1.002	0.888449	0.933147	0.968089	0.887025	0.846154	0.973791	94.7	100.9	100.6	103.8	4.31069e+09	4.19716e+09	3.63313e+09	4.32464e+09	4.67337e+09	4.47382e+09	4.62311e+09	3.74386e+09	4.46199e+09	4.06083e+09	4.6018e+09	5.11842e+09	High	High	High	High	High	High
Master Protein	A0A0R4J626	Uncharacterized protein OS=Glycine max OX=3847 GN=100777767 PE=3 SV=1	0	1139.11	79	48	2806	2	654	71.5	5.16	6541.03	48	19	0	2.776	6.687	0.252	0.989	1.33	0.737	0.146647	0.0206656	0.00394491	0.997086	0.740391	0.671356	19.5	111.7	112.7	156.1	7.01955e+06	1.03571e+07	3.86623e+06	2.84632e+07	4.16186e+07	4.02209e+07	4.05993e+07	1.90585e+07	4.29299e+07	8.44834e+07	3.57037e+07	5.62481e+07	High	High	High	High	High	High
Master Protein	I1JPP3	Uncharacterized protein OS=Glycine max OX=3847 GN=100791603 PE=4 SV=1	0	1050.44	73	60	1176	2	808	89.6	5.26	3413.36	60	3	61	1.106	1.219	0.837	0.932	0.922	0.986	0.964435	0.996048	0.999879	0.961957	0.91688	0.982511	95.2	102.9	101.1	100.8	1.34532e+09	1.22857e+09	1.21981e+09	1.20215e+09	1.36986e+09	1.32838e+09	1.38922e+09	1.16436e+09	1.30473e+09	9.87726e+08	1.30043e+09	1.32982e+09	High	High	High	High	High	High
Master Protein	I1LQR4	Uncharacterized protein OS=Glycine max OX=3847 GN=GLYMA_12G064000 PE=3 SV=1	0	1046.02	79	46	2255	2	649	71	5.21	5244.37	46	12	19	1.511	1.851	0.61	0.976	1.102	0.843	0.867963	0.800445	0.736544	0.996239	0.974322	0.932779	76.7	103.9	107.6	111.8	3.74112e+08	3.96683e+08	3.79142e+08	4.68453e+08	5.13862e+08	5.49113e+08	4.17951e+08	5.32275e+08	5.37425e+08	4.64056e+08	5.52775e+08	6.34e+08	High	High	High	High	High	High
Master Protein	Q71EW8	Methionine synthase OS=Glycine max OX=3847 GN=547643 PE=2 SV=1	0	1034.23	79	48	2259	8	763	84.2	6.33	5908.35	48	16	46	1.06	1.24	0.845	0.859	1.025	0.83	0.939497	0.999972	0.999697	0.693645	0.995593	0.919741	99.8	108.6	85.6	106	4.06716e+09	4.88204e+09	3.79654e+09	4.64422e+09	4.4293e+09	3.25148e+09	3.73063e+09	3.48963e+09	3.08679e+09	4.32081e+09	4.38276e+09	3.13027e+09	High	High	High	High	High	High
Master Protein	I1NAA5	Uncharacterized protein OS=Glycine max OX=3847 GN=100814141 PE=4 SV=1	0	1032.55	73	59	1147	2	808	89.7	5.24	3307.62	59	19	1	1.755	2.095	0.501	0.898	0.892	0.969	0.749162	0.797087	0.503102	0.88071	0.883704	0.985117	62.8	113.6	113.2	110.3	2.37278e+07	1.79197e+07	1.81529e+07	2.90183e+07	3.77573e+07	3.28078e+07	3.36668e+07	2.33727e+07	3.27134e+07	2.41076e+07	3.1875e+07	4.31686e+07	High	High	High	High	High	High
Master Protein	I1JIA0	Clathrin heavy chain OS=Glycine max OX=3847 GN=100786617 PE=3 SV=2	0	1025.53	64	79	751	1	1707	193	5.4	2098.73	79	2	5	1.549	1.759	0.917	1.3	1.384	1.08	0.899434	0.911511	0.98463	0.29204	0.716504	0.886542	159.5	60.3	61.9	118.2	2.89439e+06	1.32937e+07	1.29e+07	1.17108e+07	4.87985e+06	4.20816e+06	4.64472e+06	1.87601e+07	5.00526e+06	2.33139e+07	9.55875e+06	560123	Peak Found	Peak Found	Peak Found	Peak Found	High	High
Master Protein	I1M7S3	Clathrin heavy chain OS=Glycine max OX=3847 GN=100786715 PE=3 SV=1	0	1022.76	63	79	752	5	1700	192.4	5.44	2114.7	79	14	77	2.52	3.336	0.528	1.29	1.522	0.826	0.139286	0.149828	0.492521	0.0893401	0.305575	0.909298	78.7	95.3	113.8	112.2	1.93856e+08	2.65382e+08	2.40857e+08	2.98735e+08	2.74251e+08	2.91742e+08	3.43158e+08	3.765e+08	3.48326e+08	6.35337e+08	3.0112e+08	3.4322e+08	High	High	High	High	High	High
Master Protein	A0A0R4J5Z8	Uncharacterized protein OS=Glycine max OX=3847 GN=GLYMA_19G114500 PE=3 SV=1	0	999.278	77	46	2044	6	763	84.2	6.37	5196.98	46	19	0	1.107	1.25	0.839	0.877	1.036	0.878	0.964664	0.999972	0.999964	0.779496	0.998905	0.973791	97.8	109	94.7	98.5	8.51843e+07	1.36679e+08	1.03576e+08	1.38034e+08	1.15372e+08	9.42734e+07	8.98212e+07	1.08619e+08	1.00244e+08	1.56435e+08	1.03858e+08	1.04261e+08	High	High	High	High	High	High
Master Protein	A0A0R4J4D6	Uncharacterized protein OS=Glycine max OX=3847 GN=100812707 PE=3 SV=1	0	996.7	79	45	2234	5	649	71	5.21	4958.05	45	11	2	4.023	4.052	0.256	0.96	1.037	0.909	0.00163839	0.0819202	0.00118355	0.992912	0.999051	0.983555	58.6	103.2	102.7	135.5	4.67538e+07	5.43668e+07	4.97028e+07	7.71099e+07	8.75412e+07	1.07121e+08	6.51649e+07	8.71438e+07	9.98756e+07	1.14988e+08	9.51611e+07	1.18941e+08	High	High	High	High	High	High
Master Protein	I1MZ13	Clathrin heavy chain OS=Glycine max OX=3847 GN=GLYMA_18G026000 PE=3 SV=2	0	992.116	66	79	750	6	1700	192.8	5.53	2116.85	79	18	14	2.078	3.986	0.622	1.191	1.55	0.706	0.517572	0.160245	0.850251	0.510173	0.271432	0.537696	64	85.6	105.3	145.2	9.98405e+06	2.01873e+07	1.66357e+07	2.22562e+07	2.25429e+07	2.14983e+07	3.43756e+07	2.73891e+07	2.47899e+07	7.18231e+07	3.77678e+07	3.73525e+07	Peak Found	High	Peak Found	Peak Found	High	High
Master Protein	K7LZH1	Uncharacterized protein OS=Glycine max OX=3847 GN=GLYMA_13G130900 PE=3 SV=1	0	960.766	79	46	2252	15	632	69.2	5.25	5174.97	46	13	2	1.173	1.195	0.738	0.9	0.991	0.901	0.992687	0.989273	0.943128	0.887771	0.971731	0.982692	93.1	103.8	99.2	103.9	3.94155e+08	2.85277e+08	3.21711e+08	3.35454e+08	3.7443e+08	3.58796e+08	3.42667e+08	2.78742e+08	3.48186e+08	2.73047e+08	3.63133e+08	3.59161e+08	High	High	High	High	High	High
Master Protein	I1LZ82	Uncharacterized protein OS=Glycine max OX=3847 GN=100799580 PE=3 SV=1	0	960.669	73	58	1070	4	811	89.8	5.26	3212.53	58	13	0	0.791	0.757	0.891	0.851	0.849	1.008	0.677054	0.756931	0.963034	0.730942	0.77744	0.959592	117.8	107.5	84.5	90.1	2.0149e+07	2.34163e+07	2.23103e+07	2.05861e+07	2.03693e+07	1.90435e+07	1.60109e+07	1.51885e+07	1.89544e+07	1.70673e+07	1.66233e+07	1.76772e+07	High	High	High	High	High	High
Master Protein	I1L8Z3	Uncharacterized protein OS=Glycine max OX=3847 GN=100806067 PE=3 SV=1	0	951.782	73	59	1063	5	813	90	5.29	3145.83	59	10	6	0.797	0.9	1.044	0.849	0.885	0.963	0.602951	0.869312	0.872861	0.594915	0.846154	0.985117	116.3	96.3	93.2	94.2	6.79222e+07	6.77927e+07	6.35625e+07	6.1983e+07	5.60541e+07	5.61157e+07	5.48617e+07	4.26245e+07	5.43145e+07	6.28233e+07	5.48637e+07	4.83876e+07	High	High	High	High	High	High
Master Protein	B3TDK7	Lipoxygenase OS=Glycine max OX=3847 GN=547836 PE=3 SV=1	0	946.301	74	54	1318	14	853	96.4	6.1	3163.29	54	13	46	1.514	1.398	0.74	1.152	0.865	1.353	0.865268	0.962309	0.945047	0.590891	0.805468	0.275812	88.9	117.2	119.5	74.4	1.08291e+09	1.57384e+09	1.38347e+09	1.82405e+09	1.13722e+09	1.84579e+09	1.85951e+09	1.45929e+09	2.1344e+09	2.6733e+09	9.84085e+08	1.15817e+09	High	High	High	High	High	High
Master Protein	I1NFS4	ATP synthase subunit beta OS=Glycine max OX=3847 GN=100789705 PE=3 SV=1	0	945.482	76	33	1918	5	559	59.8	6.15	5287.86	33	20	37	1.096	1.077	0.916	1.005	0.984	0.968	0.958883	0.950088	0.968432	0.99582	0.966041	0.984469	97	96.4	101.3	105.4	2.76614e+09	2.46979e+09	2.42959e+09	2.45373e+09	2.82188e+09	2.4412e+09	2.57832e+09	2.69268e+09	2.55444e+09	2.68356e+09	2.75758e+09	2.55967e+09	High	High	High	High	High	High
Master Protein	P13708	Sucrose synthase OS=Glycine max OX=3847 GN=SS PE=1 SV=2	0	943.023	74	53	1788	4	805	92.2	6.48	4696.41	53	13	56	1.86	2.132	0.516	0.962	1.095	0.83	0.575676	0.643548	0.448554	0.994467	0.97962	0.919741	97.2	97.3	103.8	101.8	1.47611e+09	1.993e+09	2.19486e+09	3.03526e+09	1.94667e+09	1.99501e+09	1.7626e+09	2.6e+09	2.12837e+09	4.74386e+09	2.08865e+09	2.01839e+09	High	High	High	High	High	High
Master Protein	A0A0R0FH00	Uncharacterized protein OS=Glycine max OX=3847 GN=100787543 PE=3 SV=1	0	933.639	79	44	2245	3	649	71.2	5.22	4822.41	44	18	6	1.426	1.656	0.582	0.97	0.964	1.026	0.912185	0.899516	0.670272	0.996018	0.957982	0.942179	74.6	115	112.7	97.7	7.73257e+07	6.34624e+07	4.80594e+07	8.0421e+07	9.87541e+07	9.78446e+07	9.5852e+07	7.62598e+07	1.00427e+08	5.62058e+07	8.3119e+07	1.0038e+08	High	High	High	High	High	High
Master Protein	P54774	Cell division cycle protein 48 homolog OS=Glycine max OX=3847 GN=CDC48 PE=2 SV=1	0	926.898	73	59	1069	4	807	89.7	5.31	3031.64	59	13	13	1.476	1.442	0.644	0.983	1.04	0.952	0.880518	0.959797	0.810699	0.999252	0.999952	0.996019	70.5	109.6	108.6	111.4	8.12572e+07	7.30939e+07	7.1509e+07	9.33877e+07	1.20961e+08	1.13595e+08	1.12583e+08	9.99668e+07	1.26158e+08	1.06163e+08	1.15456e+08	1.39864e+08	High	High	High	High	High	High
Master Protein	K7MJY8	Sucrose synthase OS=Glycine max OX=3847 GN=GLYMA_17G045800 PE=3 SV=1	0	924.572	75	53	1915	6	805	92.1	6.35	5071.15	53	17	0	3.734	4.57	0.273	1.044	1.318	0.848	0.00406524	0.0444988	0.00226476	0.955506	0.711068	0.937187	27.3	93.8	103.1	175.8	3.46404e+07	3.88472e+07	2.74131e+07	1.31465e+08	1.09574e+08	1.19188e+08	1.17777e+08	1.31067e+08	1.47293e+08	2.78984e+08	1.04726e+08	2.23442e+08	High	High	High	High	High	High
Master Protein	A0A0R4J4C8	ATP synthase subunit beta OS=Glycine max OX=3847 GN=100797948 PE=3 SV=1	0	914.461	76	32	1939	4	559	59.8	6.15	5221.13	32	10	0	1.012	1.057	1.087	1.031	1.133	0.92	0.900801	0.943279	0.819554	0.969612	0.957982	0.993866	114.7	97.4	94	93.9	2.83753e+08	1.79571e+08	2.43489e+08	1.85583e+08	2.2007e+08	2.06861e+08	1.80902e+08	2.51239e+08	1.99679e+08	2.40293e+08	1.94614e+08	1.99379e+08	High	High	High	High	High	High
Master Protein	I1LTL9	Uncharacterized protein OS=Glycine max OX=3847 GN=100783508 PE=4 SV=1	0	909.453	73	58	1035	3	807	89.7	5.31	2901.61	58	12	2	0.998	0.995	1.185	1.015	1.109	0.906	0.913589	0.928481	0.700591	0.989839	0.966864	0.985117	97.6	93.9	106.1	102.4	2.028e+07	1.45461e+07	2.53393e+07	1.9714e+07	1.93156e+07	1.95277e+07	1.73559e+07	2.20491e+07	2.44912e+07	1.87227e+07	2.12869e+07	2.36591e+07	High	High	High	High	High	High
Master Protein	I1LMS9	Clathrin heavy chain OS=Glycine max OX=3847 GN=100802224 PE=3 SV=1	0	904.527	59	71	689	2	1700	192.9	5.44	1977.27	71	11	1	2.9	1.739	0.466	1.157	1.205	0.96	0.466604	0.941263	0.729526	0.883834	0.963982	0.991693	83.5	65.8	160.1	90.6		1.41222e+06	520521	1.72488e+06	676057	351026	1.64471e+06	1.70581e+06	1.08565e+06	3.16536e+06	930728	740737	Not Found	High	Peak Found	Peak Found	High	Peak Found
Master Protein	I1LIN2	Uncharacterized protein OS=Glycine max OX=3847 GN=100801514 PE=4 SV=1	0	890.013	62	84	664	43	1357	153.2	4.7	1854.81	84	11	40	2.27	2.689	0.425	0.949	0.974	0.978	0.252966	0.350313	0.149859	0.981606	0.963895	0.982511	80.6	112.1	103.6	103.7	1.6272e+08	1.85454e+08	1.4748e+08	2.26238e+08	2.21248e+08	2.51824e+08	2.50271e+08	2.0858e+08	2.09006e+08	2.38516e+08	2.00272e+08	2.09345e+08	High	High	High	High	High	High
Master Protein	I1KA18	Uncharacterized protein OS=Glycine max OX=3847 GN=100803679 PE=4 SV=2	0	866.239	49	80	562	16	2260	252	6.33	1352.08	80	6	61	1.33	1.628	0.828	1.138	1.291	0.924	0.96039	0.894706	0.998779	0.657109	0.764947	0.995692	99.9	104.9	100	95.1	1.72504e+08	2.09928e+08	2.27143e+08	2.27224e+08	2.00613e+08	2.20429e+08	1.87608e+08	2.462e+08	2.10057e+08	3.81972e+08	1.80116e+08	1.99782e+08	High	High	High	High	High	High
Master Protein	I1NAI7	Uncharacterized protein OS=Glycine max OX=3847 GN=GLYMA_19G190900 PE=3 SV=1	0	861.463	83	34	3257	10	444	47.6	5.57	8759.07	34	19	0	1.2	1.209	0.933	1.042	1.063	1	0.99894	0.993489	0.955983	0.958694	0.996877	0.974536	85.2	90.4	108.1	116.3	4.76283e+08	4.163e+08	3.90113e+08	4.00985e+08	4.74956e+08	4.4198e+08	5.70124e+08	4.66084e+08	5.2838e+08	5.68476e+08	7.66641e+08	5.3835e+08	High	High	High	High	High	High
Master Protein	I1J8H1	Aconitate hydratase OS=Glycine max OX=3847 GN=100499625 PE=3 SV=1	0	860.853	66	39	1102	9	901	98.5	5.86	3043.96	39	1	29	1.27	1.464	0.857	1.009	1.06	0.943	0.983903	0.942842	0.998222	0.994069	0.997378	0.997906	94.5	97.9	98.4	109.1	4.31889e+08	4.48859e+08	4.56192e+08	4.58094e+08	4.70859e+08	4.6498e+08	4.67411e+08	4.86066e+08	4.56771e+08	6.11936e+08	5.18312e+08	4.4193e+08	High	High	High	High	High	High
Master Protein	I1L1U4	Sucrose synthase OS=Glycine max OX=3847 GN=100806761 PE=3 SV=1	0	848.556	66	50	1141	11	806	92.7	6.24	2858.71	50	9	25	2.431	3.389	0.342	0.784	0.981	0.762	0.172875	0.139373	0.0243301	0.218079	0.965028	0.74268	66.9	118.7	104.9	109.5	3.01809e+08	3.05985e+08	3.21751e+08	6.64698e+08	5.32846e+08	5.42762e+08	3.31276e+08	6.19776e+08	4.7944e+08	7.28667e+08	4.31934e+08	5.0041e+08	High	High	High	High	High	High
Master Protein	I1KG34	Uncharacterized protein OS=Glycine max OX=3847 GN=GLYMA_07G002300 PE=3 SV=1	0	826.681	87	47	1064	2	623	68.7	5.5	2999.98	47	7	0	1.568	1.007	0.869	1.406	0.885	1.941	0.894924	0.94505	0.998222	0.0521479	0.896719	0.00137927	85.7	98.1	129.6	86.6	6.48533e+06	7.77344e+06	6.05829e+06	9.3373e+06	4.88485e+06	7.41681e+06	2.17395e+07	9.17633e+06	9.8028e+06	7.18903e+06	6.54967e+06	5.78299e+06	High	High	High	High	High	High
Master Protein	Q8H928	Phosphoenolpyruvate carboxylase OS=Glycine max OX=3847 GN=GmPEPC7 PE=3 SV=1	0	820.489	62	57	785	21	967	110.6	6.47	2089.44	57	13	0	1.224	1.301	1.338	1.706	1.449	1.117	0.99762	0.986763	0.488183	1.643e-06	0.441083	0.816725	102.9	77.6	126	93.5	1.09132e+08	1.13832e+08	1.19207e+08	9.76876e+07	8.58964e+07	5.46255e+07	1.19873e+08	1.39417e+08	1.59952e+08	1.64896e+08	1.03471e+08	1.01967e+08	High	High	High	High	High	High
Master Protein	I1KVU0	Uncharacterized protein OS=Glycine max OX=3847 GN=GLYMA_08G224400 PE=3 SV=1	0	817.318	85	48	1050	3	623	68.7	5.67	2830.05	48	8	55	1.785	1.986	0.685	1.054	1.045	0.999	0.648357	0.721195	0.883173	0.938265	0.999952	0.974986	83	105.2	108.8	103	5.57693e+08	5.04374e+08	4.93157e+08	6.08551e+08	6.38743e+08	6.85393e+08	7.71646e+08	6.60787e+08	6.38505e+08	7.47555e+08	6.25579e+08	6.14835e+08	High	High	High	High	High	High
Master Protein	K7K7B7	Uncharacterized protein OS=Glycine max OX=3847 GN=GLYMA_02G093200 PE=3 SV=1	0	813.614	78	37	2046	1	560	61.6	5.24	4463.15	37	2	0	3.078	4.907	0.396	1.203	1.752	0.687	0.175	0.130178	0.264284	0.580252	0.132412	0.492672	33.1	92.8	111.6	162.5	3429717	3.04125e+06	2.56208e+06	5.74699e+06	8.51905e+06	8.67015e+06	1.02467e+07	5.67145e+06	1.0556e+07	1.72382e+07	8.05248e+06	1.49244e+07	High	High	Peak Found	High	High	High
Master Protein	A0A0R0K6S7	Uncharacterized protein OS=Glycine max OX=3847 GN=100778658 PE=4 SV=1	0	811.593	47	77	549	13	2260	252.2	6.43	1316.54	77	4	0	0.999	1.23	0.98	0.972	1.098	0.838	0.900663	0.997855	0.932124	0.996239	0.984244	0.932779	63.5	105.4	99.8	131.2	4.11749e+07	2.61936e+07	2.77257e+07	3.77363e+07	4.6012e+07	4.60093e+07	4.19191e+07	4.35446e+07	4.57559e+07	6.02111e+07	4.52452e+07	5.72529e+07	High	High	High	High	High	High
Master Protein	I1M442	Aconitate hydratase OS=Glycine max OX=3847 GN=100810088 PE=3 SV=1	0	810.978	61	41	1160	4	984	107	7.56	2988.53	41	13	45	1.653	2.033	0.637	0.997	1.12	0.917	0.768722	0.694696	0.795281	0.996239	0.963982	0.989404	89	98	105.9	107.1	7.08553e+08	6.04622e+08	7.24046e+08	6.66852e+08	7.83245e+08	7.80358e+08	8.85291e+08	8.433e+08	7.4415e+08	8.52633e+08	8.63768e+08	7.93032e+08	High	High	High	High	High	High
Master Protein	I1KDL4	Phosphoenolpyruvate carboxylase OS=Glycine max OX=3847 GN=Gmppc2 PE=2 SV=1	0	806.719	67	59	762	6	967	110.6	6.05	1972.01	59	6	35	1.098	0.827	1.113	1.267	0.859	1.585	0.96032	0.793526	0.786016	0.133539	0.792511	0.0387702	129.8	82.7	121	66.5	2.86264e+08	3.0419e+08	3.09578e+08	2.59481e+08	1.93826e+08	1.64997e+08	2.83442e+08	2.19579e+08	3.30654e+08	2.72009e+08	1.52565e+08	1.55824e+08	High	High	High	High	High	High
Master Protein	I1KBV2	Ribonuclease OS=Glycine max OX=3847 GN=100794481 PE=4 SV=1	0	806.131	69	57	1020	14	990	108.7	6.43	2825.05	57	6	46	0.986	0.998	0.863	0.831	0.879	0.967	0.87601	0.924449	0.995512	0.51618	0.846154	0.984469	103.5	110.9	91.2	94.4	6.12995e+08	6.80941e+08	5.44983e+08	6.75233e+08	6.56943e+08	6.03853e+08	5.65318e+08	5.4022e+08	5.31176e+08	5.09466e+08	5.5883e+08	5.71843e+08	High	High	High	High	High	High
Master Protein	K7LNL2	Aconitate hydratase OS=Glycine max OX=3847 GN=100811955 PE=3 SV=1	0	801.839	61	34	1034	4	901	98.4	6.11	2834.14	34	11	0	1.073	0.89	0.964	0.955	0.927	0.959	0.946065	0.868235	0.934324	0.989478	0.920901	0.983555	99.8	105.1	98	97.1	6.56248e+07	7.70384e+07	6.73054e+07	6.73956e+07	7.22568e+07	7.08444e+07	5.4814e+07	6.609e+07	6.83266e+07	7.94911e+07	6.55013e+07	6.36764e+07	High	High	High	High	High	High
Master Protein	I1MCN3	Uncharacterized protein OS=Glycine max OX=3847 GN=100778196 PE=4 SV=1	0	799.655	69	49	832	16	863	95.7	5.22	2372.15	49	15	37	1.019	1.084	0.861	0.915	0.946	0.962	0.908592	0.952506	0.996585	0.929234	0.943895	0.986181	110	100.9	96	93.1	6.31659e+08	6.61847e+08	5.78107e+08	6.28232e+08	5.71318e+08	5.79501e+08	5.55112e+08	5.51377e+08	5.26331e+08	5.43691e+08	5.14607e+08	5.35012e+08	High	High	High	High	High	High
Master Protein	Q02909	Phosphoenolpyruvate carboxylase, housekeeping isozyme OS=Glycine max OX=3847 GN=PPC16 PE=2 SV=1	0	795.979	68	58	730	4	967	110.6	5.96	1817.56	58	12; 20	2	1.111	1.092	1.321	1.348	1.46	0.977	0.97381	0.959797	0.648663	0.0855357	0.544023	0.982511	98.9	81.2	116.7	103.2	1.36789e+07	1.11921e+07	1.56238e+07	1.12332e+07	1.14487e+07	8.54927e+06	1.32782e+07	1.61456e+07	1.83492e+07	1.42705e+07	1.11492e+07	1.46772e+07	High	High	High	High	High	High
Master Protein	I1JPW5	Uncharacterized protein OS=Glycine max OX=3847 GN=100811084 PE=3 SV=1	0	794.755	83	34	2846	10	444	47.6	5.69	7492.61	34	3	30	1.166	1.121	0.973	1.068	1.013	1.027	0.99099	0.966408	0.932107	0.916205	0.986433	0.950768	104.6	90	104.8	100.7	3.01938e+09	2.99248e+09	2.98129e+09	2.55133e+09	2.69853e+09	2.57324e+09	3.15067e+09	2.58505e+09	2.99602e+09	2.74417e+09	2.87873e+09	2.98538e+09	High	High	High	High	High	High
Master Protein	K7LSM2	Uncharacterized protein OS=Glycine max OX=3847 GN=100792883 PE=4 SV=1	0	789.915	57	73	599	32	1357	153.5	4.72	1644.59	73	12	0	1.901	2.388	0.525	0.874	0.998	0.848	0.574069	0.658334	0.542523	0.792331	0.974483	0.940194	53	118	105.3	123.7	1.99821e+07	2.76023e+07	1.97575e+07	4.30299e+07	4.44731e+07	5.16609e+07	4.49194e+07	3.80115e+07	3.96727e+07	5.5519e+07	4.16628e+07	4.66227e+07	High	High	High	High	High	High
Master Protein	I1M5L8	Ig-like domain-containing protein OS=Glycine max OX=3847 GN=100813658 PE=4 SV=1	0	788.156	63	47	897	13	858	94.9	5.21	2552.23	47	13	1	1.116	1.173	0.743	0.874	0.903	1.011	0.969492	0.983093	0.947228	0.768526	0.894104	0.964873	94.5	111.1	95.9	98.4	1.14724e+08	1.21871e+08	9.8451e+07	1.329e+08	1.3632e+08	1.34901e+08	1.24126e+08	1.15585e+08	1.16475e+08	1.05605e+08	1.19509e+08	1.3981e+08	High	High	High	High	High	High
Master Protein	I1LU53	Aconitate hydratase OS=Glycine max OX=3847 GN=100794803 PE=3 SV=1	0	770.626	61	40	1128	5	984	107.2	7.99	2868.22	40	12	1	0.992	0.95	0.989	1.033	0.986	0.909	0.879072	0.910829	0.934305	0.967018	0.965028	0.983378	106.9	91.5	86.4	115.3	3.36399e+07	4.96585e+07	4.39643e+07	3.764e+07	3.76918e+07	3.43376e+07	2.9305e+07	4.04377e+07	3.55436e+07	4.74332e+07	4.84558e+07	3.03841e+07	High	High	High	High	High	High
Master Protein	I1JXS8	Ribonuclease OS=Glycine max OX=3847 GN=100802766 PE=4 SV=1	0	769.1	71	56	974	18	990	108.9	6.49	2681.14	56	4	1	1.156	1.028	0.786	0.827	0.884	0.969	0.986164	0.933971	0.979786	0.488179	0.857568	0.983378	92.3	104.1	88.6	115	9.4222e+07	1.03874e+08	8.8711e+07	1.06218e+08	1.08981e+08	1.0492e+08	1.26648e+08	8.98398e+07	9.0473e+07	7.66736e+07	1.34636e+08	1.17391e+08	High	High	High	High	High	High
Master Protein	I1MHR0	S-adenosylmethionine synthase OS=Glycine max OX=3847 GN=100787994 PE=3 SV=1	0	755.219	85	28	2237	9	395	43	5.82	6249.07	28	15	9	0.675	0.617	1.185	0.793	0.827	0.975	0.322402	0.434434	0.696305	0.270705	0.697484	0.983378	129.7	107	82	81.3	1.22735e+09	1.55547e+09	1.29906e+09	1.21605e+09	9.20665e+08	1.07177e+09	7.51462e+08	8.21573e+08	8.98946e+08	7.62236e+08	8.7669e+08	8.14101e+08	High	High	High	High	High	High
Master Protein	Q6Q2Z8	Phosphoenolpyruvate carboxylase OS=Glycine max OX=3847 GN=PEPC4 PE=2 SV=1	0	732.58	71	60	665	23	966	110.5	6.42	1809.84	60	12	39	1.608	1.733	0.704	1.158	1.122	0.974	0.801664	0.860082	0.910871	0.564371	0.963982	0.983378	98.5	99.4	114	88	3.50243e+08	3.06688e+08	3.73631e+08	4.10124e+08	3.5339e+08	2.95315e+08	3.79275e+08	4.05323e+08	4.96907e+08	5.92471e+08	2.75822e+08	3.12731e+08	High	High	High	High	High	High
Master Protein	A0A0R0IPA5	Uncharacterized protein OS=Glycine max OX=3847 GN=GLYMA_08G015900 PE=4 SV=1	0	721.306	65	52	687	16	913	102.7	6.04	1841.22	52		0	0.959	0.912	0.911	0.899	0.824	1.083	0.861311	0.879688	0.970243	0.878647	0.685028	0.863588	97.2	105	98.8	99	6.4743e+07	6.89506e+07	6.89357e+07	8.40802e+07	7.44252e+07	7.15314e+07	7.59191e+07	7.00521e+07	7.00628e+07	7.01679e+07	7.54033e+07	6.03088e+07	High	High	High	High	High	High
Master Protein	A0A0R0G554	Lipoxygenase OS=Glycine max OX=3847 GN=GLYMA_15G026500 PE=3 SV=1	0	721.011	58	47	1023	3	853	96.6	6.07	2319.84	47	15	10	2.334	1.996	0.479	1.386	0.966	1.423	0.354226	0.840626	0.512412	0.0259988	0.957982	0.273456	60	111.9	152.3	75.7	1.07575e+07	1.53215e+07	1.1373e+07	2.12062e+07	1.16204e+07	2.76592e+07	2.88567e+07	1.63167e+07	3.77407e+07	3.13619e+07	1.29305e+07	1.43478e+07	High	High	High	High	High	High
Master Protein	K7MVB9	Transket_pyr domain-containing protein OS=Glycine max OX=3847 GN=100781680 PE=4 SV=1	0	718.275	58	47	583	9	1025	116	6.86	1784.7	47	18	41	1.523	1.857	0.74	0.982	1.107	0.861	0.860754	0.797087	0.944665	0.998327	0.968892	0.95427	87.4	99.5	102.2	110.9	3.15068e+08	2.34613e+08	3.25876e+08	3.3166e+08	3.82765e+08	3.58885e+08	3.68356e+08	4.51625e+08	3.28447e+08	5.07022e+08	3.90603e+08	3.99876e+08	High	High	High	High	High	High
Master Protein	K7MVD3	Uncharacterized protein OS=Glycine max OX=3847 GN=100789485 PE=3 SV=1	0	716.945	59	33	2124	2	647	70.8	5.21	4648.61	33	18	1	1.085	1.828	0.996	1.109	1.069	1.121	0.97553	0.931088	0.948481	0.911844	0.998905	0.903144	23.3	95.8	108.5	172.5	600333	608015	780158	1.88884e+06	2.49901e+06	2.87667e+06	2.83069e+06	3.07495e+06	2.71316e+06	1.14017e+07	2.37908e+06	4.5007e+06	High	High	High	Peak Found	Peak Found	High
Master Protein	I1KS65	Adenosylhomocysteinase OS=Glycine max OX=3847 GN=100786939 PE=3 SV=1	0	711.645	82	31	1023	3	485	53.3	5.88	2582.4	31	8	34	1.197	1.318	0.796	0.951	1.065	0.922	0.99762	0.981938	0.986228	0.985104	0.996877	0.994834	95.1	100.1	104.2	100.6	1.02241e+09	7.4313e+08	8.87455e+08	9.92332e+08	9.13206e+08	9.34499e+08	9.72224e+08	8.05728e+08	9.87342e+08	1.48069e+09	9.39195e+08	7.09792e+08	High	High	High	High	High	High
Master Protein	A0A0R0K6W2	Uncharacterized protein OS=Glycine max OX=3847 GN=GLYMA_05G209200 PE=4 SV=1	0	711.557	64	54	638	18	973	110	6.62	1714.79	54		36	1.375	1.585	0.708	0.923	0.919	1.011	0.940175	0.913581	0.91204	0.944985	0.91688	0.964873	100.2	107.8	100.3	91.7	2.04819e+08	2.068e+08	1.90646e+08	2.15052e+08	2.25128e+08	2.2023e+08	2.09656e+08	2.04969e+08	2.03239e+08	2.44258e+08	1.87499e+08	1.52629e+08	High	High	High	High	High	High
Master Protein	I1K3S5	Adenosylhomocysteinase OS=Glycine max OX=3847 GN=GLYMA_05G152000 PE=3 SV=1	0	705.272	83	31	1015	3	485	53.2	5.88	2493.76	31	5	0	2.23	1.903	0.547	1.004	0.834	1.221	0.433585	0.886571	0.693613	0.995969	0.750643	0.591362	50.3	119.9	122.6	107.2	3.58982e+07	1.35966e+07	1.09728e+07	2.84613e+07	3.23701e+07	3.6659e+07	3.99231e+07	2.79825e+07	3.31034e+07	9.10306e+07	2.89639e+07	2.70523e+07	High	High	High	High	High	High
Master Protein	K7LR00	UBA_e1_C domain-containing protein OS=Glycine max OX=3847 GN=100817492 PE=3 SV=1	0	702.242	70	54	575	20	1094	121.8	5.38	1735.94	54	11	35	1.321	1.657	0.756	0.992	1.124	0.894	0.964416	0.886571	0.956932	0.996277	0.963895	0.982511	85	104.3	103.3	107.4	1.83228e+08	1.70962e+08	1.87072e+08	2.24945e+08	2.36869e+08	1.99784e+08	2.01345e+08	2.22883e+08	2.25211e+08	2.74594e+08	1.9384e+08	2.31637e+08	High	High	High	High	High	High
Master Protein	I1MPM4	Uncharacterized protein OS=Glycine max OX=3847 GN=100798235 PE=4 SV=2	0	694.955	58	61	595	19	1326	146.4	6.09	1478.92	61	16	43	1.285	1.444	0.799	0.952	1.021	0.921	0.977908	0.948765	0.986228	0.986741	0.991579	0.994033	92.1	104.4	99.8	103.8	1.69192e+08	1.86643e+08	1.82645e+08	2.07027e+08	2.26277e+08	1.88872e+08	1.97912e+08	2.19185e+08	1.78723e+08	2.30333e+08	1.77004e+08	2.0596e+08	High	High	High	High	High	High
Master Protein	P24095	Seed linoleate 9S-lipoxygenase OS=Glycine max OX=3847 GN=LOX1.4 PE=1 SV=1	0	694.708	68	51	712	38	864	96.8	6.15	1930.83	51	7	13	1.36	0.889	0.754	1.06	0.61	1.685	0.946065	0.859244	0.955983	0.929184	0.049725	0.0142776	97.1	122	123.1	57.8	4.45366e+08	5.25418e+08	4.56857e+08	5.74243e+08	3.37167e+08	5.75457e+08	8.12101e+08	3.0303e+08	5.79524e+08	4.41418e+08	2.10015e+08	2.72127e+08	High	High	High	High	High	High
Master Protein	I1LVJ0	S-adenosylmethionine synthase OS=Glycine max OX=3847 GN=100820392 PE=3 SV=1	0	690.13	85	28	1843	5	392	43	6.02	5098.17	28	7	26	0.891	1.351	0.885	0.693	1.12	0.649	0.7772	0.97317	0.986228	0.00844421	0.963982	0.267916	112.8	112.7	78.5	95.9	2.00422e+09	1.86279e+09	1.86606e+09	1.86393e+09	1.81027e+09	2.0543e+09	1.15326e+09	1.67034e+09	1.29804e+09	1.48698e+09	1.97581e+09	1.5866e+09	High	High	High	High	High	High
Master Protein	B0M1A6	Betaine aldehyde dehydrogenase OS=Glycine max OX=3847 GN=100170755 PE=2 SV=1	0	687.621	84	34	834	31	503	54.7	5.34	2388.85	34	6	4	0.99	0.972	1.135	1.132	1.077	1.11	0.88159	0.911926	0.761839	0.679562	0.989255	0.829115	116.1	89.8	101.3	92.8	1.34237e+09	1.18998e+09	1.21572e+09	9.40542e+08	8.4652e+08	9.8195e+08	1.16314e+09	9.88228e+08	1.06031e+09	1.3383e+09	9.72193e+08	9.35467e+08	High	High	High	High	High	High
Master Protein	I1L6W0	Uncharacterized protein OS=Glycine max OX=3847 GN=100794734 PE=4 SV=1	0	686.159	77	33	1098	7	559	60.8	5.78	3227.81	33	9	33	1.48	1.059	0.823	1.214	0.871	1.304	0.877299	0.943342	0.998222	0.301259	0.822082	0.377043	112.2	93.3	106.1	88.3	1.32023e+09	1.47744e+09	1.31998e+09	1.20469e+09	1.09342e+09	1.09847e+09	1.24616e+09	1.31924e+09	1.24865e+09	1.0396e+09	1.05179e+09	8.36576e+08	High	High	High	High	High	High
Master Protein	I1MXB1	Glycine cleavage system P protein OS=Glycine max OX=3847 GN=100777528 PE=3 SV=1	0	680.859	65	43	480	9	1056	114.5	7.33	1708.1	43	17	34	1.077	1.046	0.886	0.961	0.977	0.942	0.946065	0.941263	0.986228	0.992974	0.963982	0.997906	98.9	101.9	100.5	98.6	1.76727e+08	1.53213e+08	1.64095e+08	1.99641e+08	1.69037e+08	1.62003e+08	1.668e+08	1.9958e+08	1.46654e+08	1.63652e+08	1.7985e+08	1.45105e+08	High	High	High	High	High	High
Master Protein	I1JDR2	Transket_pyr domain-containing protein OS=Glycine max OX=3847 GN=100786978 PE=4 SV=1	0	676.402	59	47	571	10	1029	116.4	6.81	1776.26	47	2	1	1.435	1.548	0.706	0.93	0.999	0.88	0.921955	0.95244	0.934324	0.967018	0.980878	0.974275	77.9	96.4	91.6	134.1	2.29307e+07	2.41002e+07	2.3491e+07	2.73955e+07	2.9093e+07	2.98953e+07	2.93402e+07	2.76473e+07	2.69965e+07	4.04513e+07	2.84064e+07	4.04571e+07	High	High	High	High	High	High
Master Protein	I1MHJ6	Sucrose synthase OS=Glycine max OX=3847 GN=100819730 PE=3 SV=1	0	673.563	65	47	1043	8	806	92.7	6.27	2443.29	47	15	0	2.161	3.243	0.439	0.99	1.311	0.762	0.57284	0.37376	0.405124	0.997086	0.761055	0.80433	33.6	114.2	120.4	131.8	4.2396e+06	2.76554e+06	4.22772e+06	2.3598e+07	1.43579e+07	1.11348e+07	1.35252e+07	2.00466e+07	1.5149e+07	1.45893e+07	2.34115e+07	1.65741e+07	High	High	High	High	High	High
Master Protein	I1JQV8	S-adenosylmethionine synthase OS=Glycine max OX=3847 GN=100812341 PE=3 SV=1	0	672.266	83	26	1877	12	394	43.2	5.91	5238.67	26	3	0	0.604	0.545	1.161	0.693	0.684	0.934	0.177592	0.291583	0.729519	0.00856982	0.191385	0.997906	142.9	116.5	77.7	62.9	7.54064e+08	8.04352e+08	6.6227e+08	6.4243e+08	5.14076e+08	6.14624e+08	4.22147e+08	3.92985e+08	4.10049e+08	3.2411e+08	4.8463e+08	3.32087e+08	High	High	High	High	High	High
Master Protein	I1JZE2	Methylenetetrahydrofolate reductase OS=Glycine max OX=3847 GN=100782073 PE=3 SV=1	0	667.765	84	41	766	12	595	67	6.1	2139.04	41	4	34	1.055	1.008	0.745	0.862	0.82	1.06	0.935994	0.928481	0.948259	0.708063	0.670814	0.919741	101.3	108.2	98.2	92.3	7.22585e+08	6.71109e+08	5.91526e+08	8.61093e+08	7.16553e+08	6.98317e+08	6.41239e+08	6.69754e+08	6.50293e+08	5.72416e+08	6.40497e+08	6.11723e+08	High	High	High	High	High	High
Master Protein	A0A0R0IAH0	Plasma membrane ATPase OS=Glycine max OX=3847 GN=100806580 PE=3 SV=1	0	660.683	46	46	560	4	1017	112.4	6.42	1573.01	46	9	43	2.242	3.283	0.646	1.426	2.082	0.635	0.271872	0.16076	0.814697	0.00461771	0.00435551	0.217816	49.4	71.7	104.4	174.5	1.03281e+08	1.11403e+08	1.29251e+08	1.616e+08	1.71809e+08	1.41637e+08	1.90694e+08	2.79924e+08	2.35368e+08	6.72026e+08	2.61572e+08	3.93247e+08	High	High	High	High	High	High
Master Protein	I1MM08	Malic enzyme OS=Glycine max OX=3847 GN=100784112 PE=3 SV=2	0	656.85	82	36	1833	12	591	65.2	6.04	4906.76	36	16	28	1.217	1.066	0.86	1.047	0.908	1.124	0.998264	0.9465	0.996737	0.951901	0.904428	0.803561	108.8	101.4	104.8	85	1.60345e+09	1.51424e+09	1.5747e+09	1.58354e+09	1.46868e+09	1.36649e+09	1.39778e+09	1.55976e+09	1.51662e+09	1.72635e+09	1.23134e+09	1.07029e+09	High	High	High	High	High	High
Master Protein	I1J4J6	Malic enzyme OS=Glycine max OX=3847 GN=100796117 PE=3 SV=1	0	656.214	87	35	1673	11	591	65	6.15	4335.49	35	1	1	1.238	1.066	0.865	1.079	1.127	0.955	0.995087	0.946503	0.993315	0.88071	0.962043	0.995201	87.4	89.4	110.4	112.8	1.58446e+08	1.46066e+08	1.93416e+08	1.69563e+08	1.60893e+08	1.62121e+08	2.15113e+08	2.00083e+08	1.90198e+08	3.29911e+08	2.04573e+08	1.41281e+08	High	High	High	High	High	High
Master Protein	I1MRW7	S-adenosylmethionine synthase OS=Glycine max OX=3847 GN=100799139 PE=3 SV=1	0	653.911	81	26	1915	3	392	43	5.71	5360.32	26	17	0	0.355	0.657	1.402	0.669	0.982	0.597	0.0012447	0.514756	0.405208	0.00266342	0.965028	0.108307	90.2	108.2	76.4	125.2	1.70041e+08	1.70827e+08	1.39863e+08	2.03855e+08	2.01786e+08	2.26182e+08	1.30149e+08	1.70507e+08	1.43964e+08	1.51487e+08	2.35921e+08	2.94834e+08	High	High	High	High	High	High
Master Protein	I1LMA5	Uncharacterized protein OS=Glycine max OX=3847 GN=100802040 PE=3 SV=1	0	653.896	71	39	622	14	747	81.3	6.7	1923.05	39	11	32	1.375	1.206	0.747	0.969	0.951	0.984	0.940175	0.991733	0.948681	0.996018	0.945999	0.982511	135.7	106.8	95.4	62.2	1.05971e+09	9.92797e+08	1.10105e+09	8.34012e+08	9.39537e+08	8.21952e+08	6.6929e+08	8.6324e+08	7.44901e+08	4.68352e+08	7.55037e+08	4.85564e+08	High	High	High	High	High	High
Master Protein	I1MAK3	Glutamine amidotransferase type-2 domain-containing protein OS=Glycine max OX=3847 GN=GLYMA_14G162300 PE=4 SV=2	0	652.154	39	62	432	18	2123	233	6.58	997.19	62	14	0	1.185	1.323	0.629	0.745	0.811	0.953	0.995316	0.998791	0.861743	0.145206	0.669428	0.997538	79.8	124.8	98.9	96.5	1.82826e+07	1.64842e+07	1.3825e+07	2.75777e+07	2.57672e+07	2.24387e+07	1.92973e+07	2.04207e+07	2.29777e+07	1.46968e+07	1.99359e+07	4.33624e+07	High	High	High	High	High	High
Master Protein	I1LS70	26S proteasome non-ATPase regulatory subunit 2 homolog OS=Glycine max OX=3847 GN=100777078 PE=3 SV=1	0	649.197	71	45	376	7	885	97.2	5.24	1089.36	45	12	38	1.549	2.242	0.68	1.097	1.475	0.755	0.843658	0.642061	0.883173	0.813852	0.385117	0.736681	74	102	106.2	117.9	6.57629e+07	6.17843e+07	6.37386e+07	8.78684e+07	8.92231e+07	6.49315e+07	6.05313e+07	9.15059e+07	9.90593e+07	2.10488e+08	7.34456e+07	1.01612e+08	High	High	High	High	High	High
Master Protein	I1KG02	Methylenetetrahydrofolate reductase OS=Glycine max OX=3847 GN=100797489 PE=3 SV=1	0	644.774	80	37	738	8	595	66.9	5.9	2108.49	37	6	0	1.274	1.206	0.666	0.869	0.81	1.011	0.982751	0.989464	0.875006	0.725993	0.604812	0.964306	78.8	115.7	106.8	98.6	4.60589e+07	5.99819e+07	4.10186e+07	8.21457e+07	6.69017e+07	6.76618e+07	6.24606e+07	6.30569e+07	6.04981e+07	5.92886e+07	5.7674e+07	4.80569e+07	High	High	High	High	High	High
Master Protein	I1MRA7	Amine oxidase OS=Glycine max OX=3847 GN=GLYMA_17G019300 PE=3 SV=1	0	642.589	71	32	663	32	674	75.8	6.7	1936.1	32	17	0	1.127	1.089	1.283	1.411	1.287	1.168	0.97319	0.956216	0.564491	0.00654083	0.773002	0.709305	134.1	79.4	102.1	84.4	7.55119e+08	9.6251e+08	9.01949e+08	5.99904e+08	4.01045e+08	5.34363e+08	6.84605e+08	6.86917e+08	7.17522e+08	8.06223e+08	5.67561e+08	4.61609e+08	High	High	High	High	High	High
Master Protein	I1MZW3	UBA_e1_C domain-containing protein OS=Glycine max OX=3847 GN=100780392 PE=3 SV=2	0	641.892	62	49	586	13	1112	123.7	5.25	1782.86	49	18	4	1.132	1.313	0.821	0.975	1.1	0.851	0.975481	0.99573	0.998222	0.996239	0.975779	0.947539	84.9	98.9	95.7	120.6	7.18057e+07	7.00106e+07	7.01492e+07	7.49621e+07	8.71087e+07	8.18019e+07	8.83579e+07	7.88721e+07	7.90798e+07	9.96652e+07	9.3672e+07	1.17035e+08	High	High	High	High	High	High
Master Protein	A0A0R4J2U8	TRANSKETOLASE_1 domain-containing protein OS=Glycine max OX=3847 GN=100818028 PE=4 SV=1	0	637.815	68	33	1108	27	731	78.9	6.87	2743.17	33	3	7	1.282	1.06	0.782	0.948	0.906	1.013	0.97986	0.943554	0.977789	0.981606	0.899942	0.963491	88.1	102.9	105.8	103.1	7.95265e+08	7.65077e+08	8.07048e+08	9.2898e+08	9.14836e+08	1.00103e+09	9.73187e+08	9.5535e+08	9.35011e+08	9.30617e+08	9.78357e+08	9.21122e+08	High	High	High	High	High	High
Master Protein	A0A0R4J3C9	Serine hydroxymethyltransferase OS=Glycine max OX=3847 GN=100815417 PE=2 SV=1	0	637.312	83	27	1195	5	471	51.7	7.31	3527.91	27	5	26	1.064	0.956	0.86	0.909	0.85	1.022	0.94041	0.900932	0.996737	0.916645	0.771122	0.955123	109.6	108.1	94.7	87.6	1.45887e+09	1.60897e+09	1.41685e+09	1.55307e+09	1.28981e+09	1.43873e+09	1.26024e+09	1.33403e+09	1.19839e+09	9.20316e+08	1.3363e+09	1.16669e+09	High	High	High	High	High	High
Master Protein	K7KYB1	Aconitate hydratase OS=Glycine max OX=3847 GN=100793264 PE=3 SV=1	0	634.478	63	39	839	11	979	106.9	7.05	2214.58	39	6	11	1.298	1.02	0.923	0.981	1.019	0.986	0.973145	0.933333	0.963849	0.997086	0.991287	0.982511	121.7	99.7	88.9	89.7	2.53776e+08	2.98092e+08	3.1475e+08	2.47132e+08	2.44304e+08	2.15557e+08	1.86119e+08	2.69365e+08	2.17667e+08	2.41148e+08	2.19682e+08	1.57184e+08	High	High	High	High	High	High
Master Protein	A0A0R0I854	Uncharacterized protein OS=Glycine max OX=3847 GN=GLYMA_09G137200 PE=4 SV=1	0	631.754	57	56	541	15	1273	140.5	6.24	1298.42	56		1	1.636	1.69	0.595	1.024	1.188	0.858	0.846027	0.934549	0.807471	0.985104	0.91688	0.960858	63.3	105.7	113.7	117.3	1.23663e+07	1.93255e+07	1.19149e+07	2.05387e+07	2.17193e+07	2.06444e+07	2.44124e+07	1.85684e+07	2.2224e+07	2.29256e+07	2.23058e+07	3.02642e+07	High	High	High	High	High	High
Master Protein	A0A0R0F2Z4	Uncharacterized protein OS=Glycine max OX=3847 GN=100820155 PE=4 SV=1	0	628.441	72	32	1103	6	559	60.8	5.87	3078.62	32	18	0	1.551	1.274	0.816	1.181	0.879	1.24	0.841427	0.993489	0.994839	0.444314	0.846266	0.534744	109.1	100	113.2	77.7	1.18773e+08	1.51329e+08	1.17309e+08	1.04819e+08	1.08993e+08	1.08928e+08	1.29429e+08	1.15607e+08	1.2326e+08	1.13903e+08	8.45676e+07	8.24469e+07	High	High	High	High	High	High
Master Protein	I1KEY6	26S proteasome non-ATPase regulatory subunit 2 homolog OS=Glycine max OX=3847 GN=100799779 PE=3 SV=1	0	624.903	68	43	366	5	885	97.3	5.19	1064.96	43	6	0	1.347	1.715	0.803	1.123	1.397	0.762	0.968859	0.931088	0.992815	0.853067	0.641997	0.786996	89.7	90.1	101.1	119	1.02361e+07	1.16576e+07	6.40135e+06	1.21858e+07	1.02808e+07	8.07538e+06	6.49279e+06	1.34576e+07	1.15365e+07	1.82233e+07	9.7922e+06	1.35686e+07	High	High	High	High	High	High
Master Protein	I1NHW4	Uncharacterized protein OS=Glycine max OX=3847 GN=100820546 PE=3 SV=1	0	617.223	75	41	690	9	575	61.2	5.9	1954.18	41	20	35	1.545	1.916	0.711	1.006	1.217	0.798	0.846724	0.766183	0.913278	0.99582	0.889077	0.842736	85.5	92.3	105.7	116.5	6.3688e+08	4.95077e+08	4.87973e+08	5.28222e+08	6.50111e+08	5.34401e+08	6.26909e+08	4.9674e+08	6.1196e+08	6.39602e+08	6.7455e+08	9.08619e+08	High	High	High	High	High	High
Master Protein	I1M923	Glycine cleavage system P protein OS=Glycine max OX=3847 GN=100819714 PE=3 SV=1	0	609.97	56	39	447	6	1059	114.9	7.5	1553	39	14	0	1.326	1.338	0.862	1.065	1.061	0.927	0.972004	0.989464	0.998222	0.931311	0.999051	0.998224	88.1	100	115.5	96.4	1.53944e+07	1.18525e+07	1.29937e+07	1.50694e+07	1.41615e+07	1.47479e+07	2.09396e+07	1.70196e+07	1.13846e+07	1.42038e+07	1.48961e+07	1.19615e+07	High	High	High	High	High	High
Master Protein	I1KC70	Glyceraldehyde-3-phosphate dehydrogenase OS=Glycine max OX=3847 GN=100783902 PE=3 SV=1	0	601.46	83	27	2091	4	338	36.7	7.24	5396.99	27	6	29	1.367	1.486	0.776	1.045	1.035	0.959	0.943873	0.937416	0.97267	0.954829	0.998807	0.989758	105.6	107.1	96.9	90.4	3.51217e+09	5.34776e+09	4.0294e+09	4.50228e+09	4.08365e+09	2.66754e+09	3.07979e+09	3.97231e+09	3.69389e+09	3.44917e+09	3.74997e+09	2.34885e+09	High	High	High	High	High	High
Master Protein	I1K5M9	Uncharacterized protein OS=Glycine max OX=3847 GN=100802789 PE=3 SV=1	0	600.791	72	34	686	4	582	63.5	5.53	1907.5	34	5	35	1.22	1.087	0.893	1.074	0.826	1.314	0.99762	0.95498	0.982743	0.901868	0.696205	0.353031	120	97	110.9	72.1	6.93119e+08	6.74494e+08	7.00867e+08	6.8953e+08	5.53577e+08	5.60176e+08	6.53631e+08	5.78135e+08	6.40288e+08	5.53439e+08	3.93199e+08	4.16684e+08	High	High	High	High	High	High
Master Protein	I1LCI1	Uncharacterized protein OS=Glycine max OX=3847 GN=100818544 PE=3 SV=1	0	600.088	75	41	690	8	577	61.4	5.9	1952.38	41	10	1	0.727	0.995	1.32	0.942	0.989	0.891	0.440263	0.917557	0.522734	0.969821	0.966604	0.982511	112.9	90.5	97.2	99.4	7.88583e+07	6.50491e+07	6.45917e+07	5.03074e+07	6.12219e+07	5.21451e+07	5.67877e+07	4.56982e+07	5.60296e+07	6.47648e+07	5.40377e+07	5.72793e+07	High	High	High	High	High	High
Master Protein	I1LRQ4	Aconitate hydratase OS=Glycine max OX=3847 GN=100778506 PE=3 SV=1	0	598.785	52	34	817	4	984	107.6	6.96	2084.18	34	12	0	1.667	1.008	0.589	0.974	0.764	1.16	0.87391	0.943279	0.868635	0.996239	0.730959	0.811428	68.5	129.8	129.8	71.9	1.94889e+06	1.10918e+06	1.37615e+06	2.48812e+06	2.60805e+06	2.62984e+06	1.87078e+06	2.84108e+06	2.6093e+06	1.32481e+06	2.21855e+06	1.44573e+06	High	High	High	Peak Found	High	High
Master Protein	I1KQ93	Uncharacterized protein OS=Glycine max OX=3847 GN=100780166 PE=3 SV=1	0	596.882	72	34	672	4	582	63.4	5.53	1891.33	34	8	0	1.611	1.048	0.744	1.08	0.698	1.627	0.820021	0.936435	0.950086	0.853067	0.283124	0.0371483	104.5	106.5	120.8	68.2	4.21287e+07	4.58044e+07	4.64675e+07	5.53983e+07	4.32707e+07	4.66434e+07	5.9124e+07	4.24438e+07	5.29074e+07	2.98248e+07	2.98909e+07	3.04944e+07	High	High	High	High	High	High
Master Protein	I1K565	Ribonuclease OS=Glycine max OX=3847 GN=100809534 PE=4 SV=1	0	595.644	59	50	682	17	991	108.5	6.79	1757.34	50	5	18	1.104	1.232	0.761	0.861	0.928	0.949	0.963991	0.997958	0.96218	0.706374	0.921362	0.997603	106.5	110.2	96.4	86.9	1.18348e+08	1.11178e+08	1.03538e+08	1.15051e+08	1.15858e+08	1.10522e+08	9.51421e+07	1.00675e+08	1.06183e+08	8.15669e+07	9.07481e+07	1.08169e+08	High	High	High	High	High	High
Master Protein	I1MZF9	Uncharacterized protein OS=Glycine max OX=3847 GN=100776683 PE=3 SV=2	0	595.457	70	36	584	11	746	81.2	6.62	1798.07	36	18	0	1.05	1.009	0.888	0.949	0.909	1.008	0.932331	0.921839	0.986228	0.981606	0.907293	0.957738	102.9	106.9	104.1	86	8.68446e+07	8.25725e+07	7.86938e+07	8.0873e+07	9.35374e+07	8.57826e+07	9.6551e+07	8.35425e+07	8.31132e+07	6.78136e+07	1.15817e+08	6.89963e+07	High	High	High	High	High	High
Master Protein	I1KV87	Ig-like domain-containing protein OS=Glycine max OX=3847 GN=100816539 PE=4 SV=1	0	595.257	65	42	601	17	852	94	5.33	1581.67	42	8	8	1.359	1.331	0.675	0.885	0.885	1.018	0.946065	0.982971	0.870885	0.820094	0.859379	0.959592	97.3	111.4	100.4	90.9	1.03282e+08	1.21814e+08	9.12679e+07	1.26251e+08	1.14375e+08	1.18274e+08	1.12087e+08	1.00122e+08	1.06577e+08	8.3217e+07	9.84465e+07	9.6563e+07	High	High	High	High	High	High
Master Protein	I1LWZ7	Uncharacterized protein OS=Glycine max OX=3847 GN=100776030 PE=4 SV=2	0	593.07	66	32	449	31	721	80.7	6.4	1574.65	32	13	1	1.191	1.065	1.07	1.064	1.031	1.046	0.99762	0.945682	0.841386	0.926803	0.996877	0.932779	122.1	83.6	98.2	96.1	2.228e+08	2.74935e+08	2.85545e+08	2.02939e+08	1.86555e+08	1.88261e+08	2.21089e+08	2.87632e+08	1.80964e+08	3.63125e+08	2.16254e+08	1.45695e+08	High	High	High	High	High	High
Master Protein	I1MGZ2	Plasma membrane ATPase OS=Glycine max OX=3847 GN=100804422 PE=3 SV=2	0	593.024	49	43	505	3	955	105	6.81	1383.18	43	15	1	1.358	1.641	1.202	1.245	1.49	1.095	0.968241	0.917557	0.847557	0.419807	0.490766	0.85625	28.4	81.8	133.9	155.9	2692837	1.86462e+06	3.13623e+06	1.06784e+07	7.76617e+06	6.75695e+06	4.07203e+06	1.40397e+07	1.27049e+07	1.51181e+07	9.15858e+06	1.47995e+07	Not Found	Not Found	Not Found	High	High	Peak Found
Master Protein	A0A368UIE9	Glutamine amidotransferase type-2 domain-containing protein OS=Glycine max OX=3847 GN=GLYMA_03G128300 PE=4 SV=1	0	592.295	51	56	431	12	1621	176.6	6.84	1188.86	56		44	1.375	1.437	0.797	1.011	1.126	0.879	0.940175	0.949133	0.986228	0.992472	0.963102	0.973791	63.9	68.8	75.7	191.6	9.04033e+07	1.1714e+08	1.21803e+08	1.53144e+08	1.24888e+08	1.26246e+08	1.08177e+08	1.58604e+08	1.38836e+08	4.80878e+08	2.58882e+08	3.51463e+08	High	High	High	High	High	High
Master Protein	A0A0R0KA84	Glyceraldehyde-3-phosphate dehydrogenase OS=Glycine max OX=3847 GN=GLYMA_04G193500 PE=3 SV=1	0	591.364	84	27	1834	6	338	36.8	7.58	4981.75	27	4	2	0.744	0.8	1.228	0.931	0.926	1.014	0.480643	0.757265	0.63739	0.958694	0.920901	0.963491	97.7	86.8	84.6	130.9	4.80026e+08	5.25019e+08	4.70719e+08	4.57353e+08	4.26182e+08	3.67174e+08	4.41979e+08	4.15806e+08	3.54073e+08	7.25994e+08	6.42932e+08	3.86746e+08	High	High	High	High	High	High
Master Protein	Q2I0H4	Glyceraldehyde-3-phosphate dehydrogenase OS=Glycine max OX=3847 GN=GAPC1 PE=2 SV=1	0	589.172	84	25	1940	2	338	36.7	7.24	5092.35	25	6	0	0.664	0.492	1.427	0.915	0.65	1.545	0.299621	0.198874	0.369225	0.929494	0.107898	0.0570293	132.4	92.1	106.1	69.4	3.27731e+08	3.73001e+08	3.38091e+08	3.26113e+08	2.35288e+08	2.063e+08	2.1452e+08	2.82584e+08	2.71072e+08	1.86729e+08	1.77124e+08	1.65767e+08	High	High	High	High	High	High
Master Protein	K7LQC6	Uncharacterized protein OS=Glycine max OX=3847 GN=100805946 PE=4 SV=1	0	588.083	50	44	652	6	806	89.5	5.36	1741.06	44	11	0	1.171	1.116	0.907	0.953	1.033	0.754	0.999619	0.967718	0.986228	0.994245	0.998905	0.835024	56.6	127.7	122.8	93	1.25516e+06	2.19018e+06	1.32048e+06	2.58956e+06	2.97946e+06	3.05009e+06	1.35568e+06	3.21561e+06	2.86588e+06	1.78041e+06	2.1701e+06	3.02635e+06	High	High	High	High	High	High
Master Protein	I1KUG6	Uncharacterized protein OS=Glycine max OX=3847 GN=100797704 PE=3 SV=1	0	587.732	75	23	1192	13	377	41.6	5.49	3177.78	23	8	14	1.484	1.626	0.709	0.953	1.063	0.89	0.87418	0.895605	0.91274	0.987004	0.996877	0.982511	114.1	99.9	96.2	89.7	1.27343e+09	1.54989e+09	1.27197e+09	1.11247e+09	1.14746e+09	1.11511e+09	1.07377e+09	1.16129e+09	8.93998e+08	1.57897e+09	1.00087e+09	9.38824e+08	High	High	High	High	High	High
Master Protein	I1LXY1	Uncharacterized protein OS=Glycine max OX=3847 GN=100779947 PE=3 SV=1	0	582.533	60	40	734	14	803	89	6.77	1924.55	40	13	14	1.068	1.1	0.997	1.03	1.173	0.879	0.943875	0.961114	0.91204	0.972773	0.930858	0.973987	102.6	94.7	96.2	106.5	1.86508e+08	2.05329e+08	1.87197e+08	1.83471e+08	1.72937e+08	1.29367e+08	1.75662e+08	1.96964e+08	1.46335e+08	2.63926e+08	1.90958e+08	1.94344e+08	High	High	High	High	High	High
Master Protein	I1N570	Uncharacterized protein OS=Glycine max OX=3847 GN=GLYMA_18G290800 PE=3 SV=1	0	579.276	81	22	1231	4	377	41.8	5.4	2997.96	22	18	7	1.02	0.915	0.924	1.008	0.92	1.15	0.909997	0.876704	0.963034	0.994284	0.91688	0.756294	113.1	99.2	101.7	86	4.04496e+08	5.08772e+08	3.90258e+08	4.05428e+08	3.54864e+08	3.32525e+08	4.75983e+08	3.63555e+08	3.55641e+08	4.02723e+08	2.98612e+08	3.07508e+08	High	High	High	High	High	High
Master Protein	I1NF84	Vacuolar proton pump subunit B OS=Glycine max OX=3847 GN=100793764 PE=3 SV=1	0	574.236	83	30	751	3	488	54.2	5.02	2154.11	30	20	31	1.105	1	0.905	1.011	0.982	1.03	0.964316	0.925284	0.974962	0.992013	0.965028	0.947814	118.5	94.5	102.7	84.4	7.05669e+08	6.19504e+08	6.62254e+08	5.83641e+08	5.13058e+08	5.28202e+08	5.73782e+08	6.08484e+08	5.40059e+08	5.60625e+08	4.71451e+08	4.40027e+08	High	High	High	High	High	High
Master Protein	Q9FUK4	Glutamine synthetase OS=Glycine max OX=3847 GN=548082 PE=2 SV=1	0	574.017	76	23	819	11	356	39	5.73	2575.95	23	11	14	1.755	2.541	0.854	1.322	1.316	0.947	0.677054	0.414852	0.998222	0.0465683	0.714018	0.997603	72.4	89.7	115.6	122.3	7.41976e+08	9.5521e+08	9.40114e+08	9.01311e+08	1.16469e+09	1.24722e+09	1.47246e+09	1.50651e+09	1.50079e+09	2.61083e+09	1.58861e+09	1.20944e+09	High	High	High	High	High	High
Master Protein	I1JTW7	Glycine cleavage system P protein OS=Glycine max OX=3847 GN=100795673 PE=3 SV=1	0	570.935	68	38	350	10	1031	111.9	7.36	1248.51	38	4	12	0.756	0.657	1.018	0.848	0.706	1.16	0.539959	0.602754	0.91204	0.648337	0.301975	0.751327	127.7	112.5	83.2	76.6	5.33783e+07	5.93644e+07	5.39973e+07	5.41433e+07	4.75443e+07	3.74142e+07	3.51749e+07	4.34342e+07	2.8317e+07	3.23991e+07	3.65425e+07	2.01086e+07	High	High	High	High	High	High
Master Protein	I1KZW7	Pyrophosphate--fructose 6-phosphate 1-phosphotransferase subunit beta OS=Glycine max OX=3847 GN=100797925 PE=3 SV=1	0	570.028	75	33	566	7	562	61.4	7.03	1669.93	33	9	30	0.807	0.782	1.061	0.911	0.835	1.14	0.627304	0.726921	0.85261	0.924958	0.724292	0.777519	125.3	97.5	100.4	76.8	4.01199e+08	4.2216e+08	3.75665e+08	3.79924e+08	3.12056e+08	3.00031e+08	3.21471e+08	2.83246e+08	3.26133e+08	2.45815e+08	4.06211e+08	1.92894e+08	High	High	High	High	High	High
Master Protein	I1LGR6	Uncharacterized protein OS=Glycine max OX=3847 GN=100777060 PE=3 SV=1	0	565.706	59	48	363	18	1125	127.3	6.71	1113.28	48	11	0	1.209	1.54	0.794	1.021	1.135	0.895	0.999619	0.959734	0.992429	0.984805	0.957982	0.982511	87.5	109.1	97.1	106.3	2.32809e+07	2.27532e+07	2.60026e+07	2.94283e+07	2.90177e+07	2.26189e+07	2.47994e+07	2.58167e+07	2.83097e+07	3.80173e+07	2.75894e+07	2.82661e+07	High	High	High	High	High	High
Master Protein	I1KKN7	Pyrophosphate--fructose 6-phosphate 1-phosphotransferase subunit alpha OS=Glycine max OX=3847 GN=100800863 PE=3 SV=1	0	565.286	78	35	599	7	617	67.4	7.27	1752.28	35	7	31	0.975	0.961	0.957	0.983	0.939	1.103	0.873658	0.903424	0.94135	0.998636	0.935624	0.84415	107.9	99.8	103.5	88.7	3.60763e+08	3.93238e+08	3.59031e+08	4.29158e+08	3.33625e+08	2.97937e+08	3.46097e+08	2.98329e+08	3.63912e+08	3.80108e+08	2.92051e+08	2.96674e+08	High	High	High	High	High	High
Master Protein	I1JY56	Uncharacterized protein OS=Glycine max OX=3847 GN=100789000 PE=3 SV=1	0	562.935	73	21	1271	3	377	41.7	5.49	3146.55	21	4	9	0.794	0.835	1.072	0.986	0.94	1.059	0.59722	0.802112	0.838491	0.999252	0.935901	0.919741	130.9	93.2	93.3	82.7	3.15512e+08	3.76048e+08	3.47468e+08	2.92887e+08	2.44524e+08	2.47475e+08	2.20925e+08	2.56702e+08	2.47594e+08	3.15384e+08	2.19483e+08	1.62254e+08	High	High	High	High	High	High
Master Protein	I1KSC8	Uncharacterized protein OS=Glycine max OX=3847 GN=100805849 PE=4 SV=1	0	555.5	68	42	292	7	1114	123.2	4.87	812.19	42	8	35	1.282	1.978	0.893	1.203	1.668	0.769	0.98273	0.80294	0.983604	0.418112	0.126188	0.776718	96.2	79.3	114.3	110.2	2.46557e+07	4.41667e+07	3.28755e+07	3.81123e+07	2.71097e+07	2.1642e+07	3.55319e+07	3.97516e+07	3.90509e+07	1.22196e+08	3.24785e+07	3.76758e+07	High	High	High	High	High	High
Master Protein	I1KEN4	Uncharacterized protein OS=Glycine max OX=3847 GN=100807407 PE=3 SV=1	0	554.295	55	47	535	11	966	110.2	5.74	1327.78	47	6	0	0.924	0.527	1.19	1.368	0.822	1.771	0.86974	0.439743	0.813954	0.115447	0.697611	0.0081014	123.6	69.2	121.3	85.9	1.49916e+07	1.58189e+07	1.55097e+07	1.57623e+07	8.69022e+06	7.79393e+06	2.34741e+07	9.10957e+06	1.52218e+07	1.49866e+07	9.55183e+06	1.07832e+07	High	High	High	High	High	High
Master Protein	I1MFL2	Pyrophosphate--fructose 6-phosphate 1-phosphotransferase subunit beta OS=Glycine max OX=3847 GN=100804429 PE=3 SV=1	0	552.012	76	32	561	6	562	61.2	6.54	1679.72	32	15	0	0.886	0.691	1.12	0.922	0.706	1.37	0.786009	0.603957	0.81702	0.952733	0.283683	0.248207	126.9	106	99.3	67.8	4.65421e+07	4.67894e+07	3.85406e+07	4.37878e+07	3.88947e+07	3.2961e+07	3.82869e+07	2.87494e+07	3.64283e+07	2.48578e+07	2.87688e+07	1.87817e+07	High	High	High	High	High	High
Master Protein	K7LIQ6	HP domain-containing protein OS=Glycine max OX=3847 GN=100807846 PE=4 SV=1	0	550.727	60	45	396	23	973	107.3	5.82	1126.48	45	10	23	1.253	1.545	0.694	0.902	1.013	0.849	0.990286	0.924751	0.892843	0.894766	0.986361	0.937692	90.5	109.6	92.9	107	1.34475e+08	1.50969e+08	1.67535e+08	1.60874e+08	1.82992e+08	2.09504e+08	1.50442e+08	1.55012e+08	1.62661e+08	2.5631e+08	1.46393e+08	1.78619e+08	High	High	High	High	High	High
Master Protein	A0A0R0LJG5	Uncharacterized protein OS=Glycine max OX=3847 GN=100812453 PE=3 SV=1	0	550.59	62	50	377	20	1090	123.3	6.38	1115.75	50	1	30	1.213	1.65	0.779	0.949	1.194	0.794	0.99894	0.886571	0.975697	0.981606	0.915525	0.833481	79.3	108.1	90	122.6	9.83703e+07	1.16608e+08	9.34987e+07	1.34129e+08	1.41852e+08	1.07775e+08	1.0442e+08	1.1689e+08	1.11664e+08	1.86642e+08	1.2062e+08	1.52151e+08	High	High	High	High	High	High
Master Protein	C6T7Y1	Uncharacterized protein OS=Glycine max OX=3847 GN=100807341 PE=2 SV=1	0	549.776	80	22	1119	1	377	41.7	5.49	2824.14	22	19	12	2	2.155	0.487	0.951	0.994	0.925	0.446921	0.630932	0.342893	0.985104	0.974483	0.996019	83.5	101.9	97.1	117.5	2.71545e+08	2.97077e+08	2.17796e+08	3.30851e+08	3.31227e+08	3.41504e+08	3.5534e+08	3.03326e+08	3.15506e+08	3.81758e+08	2.8832e+08	3.96416e+08	High	High	High	High	High	High
Master Protein	I1L0U6	Importin subunit alpha OS=Glycine max OX=3847 GN=100780020 PE=3 SV=1	0	549.537	88	32	496	7	531	58.6	5.26	1514.2	32	9	26	0.904	0.956	1.053	1.033	1.156	0.922	0.798701	0.900666	0.861743	0.967129	0.944616	0.994834	104.5	82.3	97.4	115.8	2.15505e+08	1.44504e+08	1.85061e+08	1.45728e+08	1.62968e+08	1.36293e+08	1.72527e+08	1.40555e+08	1.75388e+08	2.05102e+08	2.15663e+08	1.76734e+08	High	High	High	High	High	High
Master Protein	K7M387	Uncharacterized protein OS=Glycine max OX=3847 GN=100819867 PE=3 SV=1	0	549.278	59	48	479	19	1166	127.4	5.31	1327.39	48	13	30	1.687	2.031	0.615	0.96	0.99	0.976	0.740724	0.696085	0.747247	0.992912	0.969317	0.982889	80.9	105.3	106.3	107.6	1.48143e+08	1.32604e+08	1.2712e+08	1.65778e+08	1.7253e+08	1.80766e+08	1.77581e+08	1.74207e+08	1.54507e+08	1.80593e+08	1.7633e+08	1.6949e+08	High	High	High	High	High	High
Master Protein	I1LVI3	Uncharacterized protein OS=Glycine max OX=3847 GN=100798346 PE=3 SV=1	0	548.225	64	50	563	14	922	100.1	9.07	1510.02	50	12	37	1.221	1.49	0.704	0.895	0.993	0.928	0.99762	0.936435	0.910871	0.859413	0.973971	0.997603	100.8	109.5	96.5	93.2	1.84496e+08	1.86397e+08	1.7308e+08	2.00522e+08	2.05478e+08	1.96521e+08	2.35805e+08	1.62377e+08	1.76702e+08	1.43983e+08	1.70578e+08	2.01376e+08	High	High	High	High	High	High
Master Protein	A0A0R0IK90	Serine hydroxymethyltransferase OS=Glycine max OX=3847 GN=100305380 PE=3 SV=1	0	546.097	65	25	1144	3	541	59.8	8.21	3375.99	25	8	0	1.259	1.311	0.818	0.828	0.815	0.909	0.987475	0.993489	0.995512	0.495792	0.653423	0.993397	105.3	119.6	100.7	74.3	101141057	1.03873e+08	8.26795e+07	1.23454e+08	1.01894e+08	1.14836e+08	8.20736e+07	1.15661e+08	9.67403e+07	6.49168e+07	1.01664e+08	7.13873e+07	High	High	High	High	High	High
Master Protein	K7M828	UBA_e1_C domain-containing protein OS=Glycine max OX=3847 GN=100799433 PE=3 SV=1	0	546.051	55	46	463	10	1094	120.9	5.43	1367.97	46	14	11	1.149	1.28	0.801	0.967	1.065	0.886	0.983748	0.995896	0.986228	0.99582	0.998905	0.982511	92.3	102	100.4	105.4	4.88117e+07	5.47434e+07	4.97206e+07	6.07944e+07	5.49507e+07	4.75478e+07	5.41261e+07	5.41781e+07	5.12968e+07	7.23255e+07	5.16636e+07	5.67835e+07	High	High	High	High	High	High
Master Protein	A0A0R4J2L6	M16C_associated domain-containing protein OS=Glycine max OX=3847 GN=100778773 PE=4 SV=1	0	544.352	64	51	414	51	1078	121.3	6.13	1039.9	51	1	0	1.143	1.213	0.864	1.007	1.009	0.957	0.981228	0.993106	0.994825	0.994485	0.984613	0.994018	100.4	98.2	100	101.5	1.07927e+08	1.0222e+08	9.15559e+07	9.99807e+07	1.10324e+08	8.50072e+07	1.03496e+08	1.01885e+08	9.40572e+07	1.0334e+08	9.70316e+07	1.10865e+08	High	High	High	High	High	High
Master Protein	I1N438	Vacuolar proton pump subunit B OS=Glycine max OX=3847 GN=100804483 PE=3 SV=2	0	544.222	83	29	726	2	489	54.2	5.06	2065.96	29	18	0	0.733	0.574	1.369	1.01	0.598	1.576	0.65461	0.588362	0.675338	0.996018	0.162095	0.111733	138.4	97.3	98.5	65.7	7.7546e+06	7.85357e+06	8.87284e+06	6.31239e+06	5.45637e+06	5.52052e+06	5.56732e+06	5.94998e+06	5.58778e+06	3.72939e+06	5.11262e+06	1.8298e+06	High	High	High	High	High	High
Master Protein	I1KP14	Ribonuclease OS=Glycine max OX=3847 GN=100782692 PE=4 SV=1	0	542.893	60	47	654	13	995	108.7	6.48	1726.47	47	8	0	1.194	1.299	0.904	0.929	1.04	0.861	0.99762	0.999972	0.970243	0.967018	0.998905	0.974036	98	105.8	92.3	103.8	1.94002e+07	1.80776e+07	1.62848e+07	1.72223e+07	1.97027e+07	1.95228e+07	2.3658e+07	1.70301e+07	1.54919e+07	1.40609e+07	1.91495e+07	1.93808e+07	High	High	High	High	High	High
Master Protein	I1JNK9	Uncharacterized protein OS=Glycine max OX=3847 GN=100781142 PE=3 SV=1	0	542.695	80	22	1079	1	377	41.6	5.49	2809.32	22	3	1	3.631	4.695	0.281	1.025	1.211	0.771	0.0104691	0.0482827	0.00758528	0.977605	0.899513	0.803561	29.3	121.9	121.8	127.1	2.75163e+07	1.63595e+07	1.25075e+07	5.31215e+07	7.9416e+07	6.81262e+07	9.2019e+07	4.95138e+07	6.80628e+07	7.10094e+07	6.61695e+07	9.47476e+07	High	High	High	High	High	Peak Found
Master Protein	I1L3K7	Uncharacterized protein OS=Glycine max OX=3847 GN=100803925 PE=3 SV=1	0	541.008	77	25	1435	3	445	48	6.29	3793.91	25	9	0	0.722	0.125	1.58	1.253	0.229	5.766	0.428452	4.51094e-06	0.26456	0.120591	2.55945e-14	2.5378e-16	156.8	87.4	138.7	17.1	7.46737e+07	7.64236e+07	6.48895e+07	5.52479e+07	4.16233e+07	3.54296e+07	6.60798e+07	2.50975e+07	7.86037e+07	5.58618e+06	1.17294e+07	8.1469e+06	High	High	High	High	High	High
Master Protein	I1J8Z9	Clathrin heavy chain OS=Glycine max OX=3847 GN=100784651 PE=3 SV=1	0	540.855	39	51	420	3	1702	192.6	5.39	1117.69	51	1	8	1.86	1.829	0.588	1.144	1.264	0.897	0.747983	0.902675	0.779604	0.789693	0.895532	0.984469	50.6	120.1	143.1	86.2	2.30615e+06	2.24198e+06	2.91641e+06	5.4757e+06	4.76212e+06	5.54801e+06	4.77346e+06	6.61161e+06	6.52335e+06	6.87786e+06	3.83271e+06	3.92876e+06	Peak Found	Peak Found	Peak Found	High	Peak Found	Peak Found
Master Protein	I1KBY3	UVR domain-containing protein OS=Glycine max OX=3847 GN=100804035 PE=3 SV=1	0	540.845	53	45	531	6	922	102.4	6.46	1453.14	45	6	44	1.192	1.24	0.817	0.986	1.11	0.897	0.99762	0.999972	0.995512	0.999252	0.966604	0.982511	103	100.9	94	102.1	2.19312e+08	1.85766e+08	1.92503e+08	1.91234e+08	1.88676e+08	1.77309e+08	1.74026e+08	1.75625e+08	1.9437e+08	1.90808e+08	1.90412e+08	1.96899e+08	High	High	High	High	High	High
Master Protein	I1N7G4	CYTOSOL_AP domain-containing protein OS=Glycine max OX=3847 GN=100808230 PE=3 SV=1	0	540.427	76	34	479	30	582	60.8	6.8	1514.66	34	19	4	1.175	1.305	0.869	1.003	1.055	0.917	0.993208	0.986362	0.990068	0.99582	0.999663	0.989404	90.9	102.7	98.3	108.2	3.68401e+08	2.99319e+08	3.17146e+08	3.58287e+08	3.81082e+08	3.1849e+08	3.03589e+08	4.00888e+08	3.43068e+08	3.77441e+08	3.52158e+08	3.99196e+08	High	High	High	High	High	High
Master Protein	I1N8S9	Glutamine amidotransferase type-2 domain-containing protein OS=Glycine max OX=3847 GN=GLYMA_19G130800 PE=4 SV=1	0	539.803	50	54	418	10	1581	172.1	7.11	1152.41	54	19	0	1.402	1.116	0.841	1.123	0.958	1.199	0.946488	0.966408	0.999879	0.804549	0.948318	0.621493	85.3	104.8	121.7	88.1	9.44591e+06	1.01674e+07	1.5447e+07	1.54359e+07	1.24883e+07	1.21497e+07	1.28386e+07	1.8285e+07	1.45024e+07	1.8773e+07	9.9072e+06	1.05023e+07	High	High	High	High	High	High
Master Protein	I1ND14	Pyrophosphate--fructose 6-phosphate 1-phosphotransferase subunit alpha OS=Glycine max OX=3847 GN=100819847 PE=3 SV=1	0	539.622	73	34	603	6	617	67.6	6.96	1655.44	34	20	0	1.486	1.452	0.637	1.026	0.991	1.081	0.88911	0.970166	0.82421	0.981758	0.973815	0.888074	106.9	91.8	106.3	95	2.81363e+07	4.34117e+07	3.598e+07	4.27792e+07	3.09131e+07	2.78707e+07	3.86801e+07	2.8053e+07	3.58015e+07	3.1976e+07	2.19301e+07	3.63652e+07	High	High	High	High	High	High
Master Protein	B3TDK9	Lipoxygenase OS=Glycine max OX=3847 GN=100803358 PE=3 SV=1	0	538.606	48	36	690	3	856	96.3	6.81	1588.12	36	15	5	3.853	4.801	0.268	1.147	1.707	0.773	0.0565596	0.202513	0.10579	0.77935	0.283124	0.817406	27.2	85.6	134.9	152.3	675007	1.04159e+06	1.40062e+06	2.923e+06	3.27935e+06	6.53615e+06	5.16503e+06	3.72738e+06	6.12497e+06	1.17806e+07	5.82968e+06	3.71262e+06	Peak Found	Peak Found	Peak Found	Peak Found	Peak Found	High
Master Protein	I1JQX3	AA_TRNA_LIGASE_II domain-containing protein OS=Glycine max OX=3847 GN=100816763 PE=3 SV=1	0	538.313	69	33	442	5	515	58.6	6.49	1183.95	33	3	31	0.839	0.81	1.048	0.905	0.944	1.008	0.685625	0.774131	0.867515	0.906675	0.940904	0.969294	114.4	106.1	94.1	85.4	2.66444e+08	3.56795e+08	2.89164e+08	3.24526e+08	2.6801e+08	1.98992e+08	2.08058e+08	2.733e+08	2.37841e+08	2.95181e+08	2.00846e+08	2.15708e+08	High	High	High	High	High	High
Master Protein	I1MQ89	Uncharacterized protein OS=Glycine max OX=3847 GN=100787663 PE=3 SV=1	0	537.696	77	27	1462	4	445	48	6.47	3744.04	27	16	18	1.05	0.306	1.23	1.518	0.447	3.204	0.931629	0.0113608	0.636536	0.000440466	0.000134807	1.61633e-10	138	83.1	143.8	35	4.08683e+08	3.85726e+08	3.67265e+08	2.77414e+08	2.32355e+08	1.97575e+08	5.51473e+08	1.20263e+08	4.0205e+08	7.8153e+07	1.05209e+08	9.79645e+07	High	High	High	High	High	High
Master Protein	A0A0R0ETX2	FAD-binding PCMH-type domain-containing protein OS=Glycine max OX=3847 GN=GLYMA_19G259300 PE=4 SV=1	0	535.52	74	31	626	16	589	64.8	7.2	1695.07	31	19	16	1.323	1.582	0.712	0.847	1.172	0.745	0.963671	0.913581	0.913278	0.62892	0.933563	0.681128	75.1	108.9	95.7	120.3	3.46796e+08	3.47653e+08	4.29995e+08	3.77716e+08	5.04483e+08	5.7404e+08	4.43006e+08	5.16588e+08	3.66669e+08	6.2463e+08	5.06164e+08	5.57158e+08	High	High	High	High	High	High
Master Protein	A0A0R0IQ92	Phospholipase D OS=Glycine max OX=3847 GN=GLYMA_08G211700 PE=3 SV=1	0	534.484	64	39	436	10	788	89.2	5.8	1238.13	39	8	19	1.696	1.836	0.654	1.088	1.202	0.822	0.729677	0.822669	0.832881	0.844896	0.911771	0.897838	85.4	96.4	121.7	96.4	8.92767e+07	9.59665e+07	9.13804e+07	1.30339e+08	1.03175e+08	9.61513e+07	1.32119e+08	1.30194e+08	1.05077e+08	1.94972e+08	1.03145e+08	9.29773e+07	High	High	High	High	High	High
Master Protein	I1KLJ1	Uncharacterized protein OS=Glycine max OX=3847 GN=100779259 PE=4 SV=1	0	533.953	66	36	415	9	746	81.9	6.04	1277.93	36	7	27	1.089	1.011	0.898	0.944	0.95	1.015	0.954979	0.929835	0.979255	0.97824	0.94553	0.962912	107.2	105.6	93.1	94.1	1.46991e+08	1.46127e+08	1.3664e+08	1.54212e+08	1.44032e+08	1.08954e+08	1.26907e+08	1.3532e+08	1.20877e+08	1.30096e+08	1.28316e+08	1.18863e+08	High	High	High	High	High	High
Master Protein	I1KG56	Coatomer subunit beta OS=Glycine max OX=3847 GN=100802469 PE=4 SV=1	0	532.432	57	41	367	6	950	106	5.87	980.85	41	7	34	1.578	2.295	0.696	1.11	1.492	0.725	0.826746	0.615006	0.907136	0.768526	0.357837	0.610844	88.3	86.2	98.6	126.8	4.50812e+07	7.60717e+07	7.37561e+07	1.00027e+08	7.20196e+07	6.49748e+07	7.25402e+07	1.00704e+08	8.23977e+07	1.94533e+08	9.23641e+07	1.05936e+08	High	High	High	High	High	High
Master Protein	I1MGI7	Importin subunit alpha OS=Glycine max OX=3847 GN=100808498 PE=3 SV=1	0	531.954	83	30	497	3	531	58.6	5.26	1511.89	30	15	2	0.759	0.809	1.262	0.922	0.966	0.954	0.599484	0.778904	0.618703	0.952188	0.957982	0.997603	111.9	91.1	84.3	112.7	3.78169e+07	3.4237e+07	2.85367e+07	2.78566e+07	3.14061e+07	2.72201e+07	2.46093e+07	2.57983e+07	3.29401e+07	2.45663e+07	3.58371e+07	3.44775e+07	High	High	High	High	High	Peak Found
Master Protein	I1K6S6	UVR domain-containing protein OS=Glycine max OX=3847 GN=100814891 PE=3 SV=2	0	530.289	55	45	503	4	919	102.3	6.77	1351.48	45	5	4	0.638	0.613	1.275	0.914	0.893	1.076	0.386479	0.579028	0.688593	0.942382	0.869529	0.871557	136.2	81.5	105.8	76.5	2.24573e+07	1.50051e+07	1.94318e+07	1.48158e+07	1.16284e+07	1.0469e+07	1.51929e+07	1.17678e+07	1.51047e+07	9.2597e+06	1.09173e+07	1.45568e+07	High	Peak Found	Peak Found	High	High	High
Master Protein	C6TAA6	Uncharacterized protein OS=Glycine max OX=3847 GN=100798523 PE=2 SV=1	0	529.693	73	21	1113	2	377	41.7	5.49	2670.39	21	5	1	0.599	0.55	1.273	0.816	0.772	1.277	0.336816	0.498981	0.74147	0.582132	0.519432	0.431796	140.5	98.2	89	72.3	1.11078e+07	2.00282e+07	1.51297e+07	1.47778e+07	1.05684e+07	9.75966e+06	7.82738e+06	1.41568e+07	9.58555e+06	1.26274e+07	7.78374e+06	2.98611e+06	Peak Found	High	High	High	High	High
Master Protein	K7LRK7	Glutamine amidotransferase type-1 domain-containing protein OS=Glycine max OX=3847 GN=100818572 PE=3 SV=1	0	529.531	46	51	429	21	1410	154.3	5.3	1115.94	51	11	30	1.442	1.724	0.69	0.942	1.054	0.869	0.900823	0.887622	0.886067	0.973208	0.999952	0.966172	84.8	102.1	95.3	117.8	7.57228e+07	7.21615e+07	7.8048e+07	1.08015e+08	9.11925e+07	9.11972e+07	7.99931e+07	1.05784e+08	8.51266e+07	1.49095e+08	8.53438e+07	1.0524e+08	High	High	High	High	High	High
Master Protein	I1LCN7	Coatomer subunit alpha OS=Glycine max OX=3847 GN=100784701 PE=4 SV=1	0	529.409	58	51	379	12	1218	136.6	6.96	948.06	51	10	39	1.402	1.966	0.813	1.073	1.43	0.712	0.926303	0.784807	0.992474	0.904468	0.475945	0.526337	95.2	89.5	102.2	113.1	5.26885e+07	8.74549e+07	9.17064e+07	9.44727e+07	8.22294e+07	7.899e+07	6.56657e+07	1.0001e+08	9.39024e+07	1.91189e+08	9.42822e+07	1.0392e+08	High	High	High	High	High	High
Master Protein	I1LRE4	Uncharacterized protein OS=Glycine max OX=3847 GN=100797805 PE=3 SV=1	0	527.199	71	29	538	1	527	57.1	5.72	1696.95	29	12	0	0.862	0.862	1.309	0.995	1.108	0.99	0.829715	0.883798	0.693613	0.997086	0.983775	0.973791	110.9	97.2	95.5	96.5	1.58346e+07	1.12447e+07	1.14684e+07	1.07332e+07	1.00533e+07	8.58985e+06	9.88013e+06	9.82782e+06	1.06838e+07	9.516e+06	9.97962e+06	1.36474e+07	High	High	High	High	High	High
Master Protein	E2FKH2	Sieve element occlusion a OS=Glycine max OX=3847 GN=SEOa PE=2 SV=1	0	527.169	70	44	535	12	698	80	6.83	1462.45	44	2	35	2.016	2.415	0.488	0.977	1.193	0.815	0.433713	0.479452	0.347241	0.996259	0.915902	0.884943	65.1	99.8	104.8	130.3	1.3655e+08	1.59448e+08	1.78534e+08	2.7377e+08	2.44539e+08	2.32394e+08	2.41843e+08	2.89832e+08	2.56705e+08	4.31188e+08	2.41206e+08	3.19089e+08	High	High	High	High	High	High
Master Protein	I1KZR0	Uncharacterized protein OS=Glycine max OX=3847 GN=100778966 PE=3 SV=1	0	525.888	57	45	530	9	922	100.1	9.06	1473.52	45	9	0	0.712	0.632	1.141	0.874	0.85	1.056	0.40587	0.514756	0.761181	0.774139	0.78444	0.930593	128.4	93.3	93.3	85.1	6.83344e+07	5.71735e+07	6.42066e+07	4.93282e+07	4.66542e+07	4.36954e+07	5.13502e+07	4.6633e+07	4.33015e+07	5.68147e+07	4.25339e+07	4.01241e+07	High	High	High	High	High	High
Master Protein	I1JWK3	Uncharacterized protein OS=Glycine max OX=3847 GN=100776541 PE=3 SV=1	0	525.53	59	38	741	11	799	88.6	6.86	1968.1	38	20; 4	0	1.162	1.331	0.86	0.977	1.229	0.847	0.994062	0.99573	0.990068	0.997086	0.870231	0.939464	94.8	105.9	99.9	99.4	2.622e+07	3.23844e+07	2.70375e+07	3.32369e+07	3.01992e+07	2.41538e+07	2.33448e+07	3.49454e+07	2.84782e+07	3.18752e+07	2.63443e+07	2.83426e+07	High	High	High	High	High	High
Master Protein	I1M7B9	T-complex protein 1 subunit eta OS=Glycine max OX=3847 GN=100779791 PE=3 SV=1	0	524.704	76	31	479	6	560	60.2	6.58	1433.34	31	14	0	0.671	0.628	1.357	1.009	1.014	1.011	0.433585	0.506566	0.462093	0.992509	0.984894	0.966172	147.3	73.8	99.3	79.6	2.79011e+07	3.46004e+07	3.06347e+07	2.57862e+07	1.53452e+07	1.23783e+07	2.07816e+07	2.06573e+07	1.90839e+07	3.31818e+07	1.65652e+07	1.02959e+07	High	High	High	High	High	High
Master Protein	I1LKU1	Uncharacterized protein OS=Glycine max OX=3847 GN=100794780 PE=3 SV=1	0	523.788	71	29	529	1	527	57	5.8	1683.64	29	11	32	0.78	0.962	1.184	1.009	1.123	0.909	0.567473	0.903958	0.697779	0.993607	0.963895	0.98431	108.1	93.7	94.6	103.6	4.36117e+08	3.20144e+08	3.36366e+08	3.15372e+08	2.91681e+08	2.59334e+08	3.35648e+08	2.92966e+08	2.94443e+08	3.37737e+08	3.22294e+08	2.92814e+08	High	High	High	High	High	High
Master Protein	I1MBR7	UTP--glucose-1-phosphate uridylyltransferase OS=Glycine max OX=3847 GN=100790112 PE=3 SV=1	0	522.187	79	31	984	12	469	51.4	5.34	2474.49	31	14	21	1.482	1.127	0.672	1.176	0.731	1.612	0.875188	0.967593	0.866715	0.470898	0.344566	0.0297306	112.5	97.4	120.8	69.3	8.03482e+08	6.55607e+08	6.7665e+08	6.82749e+08	5.68678e+08	5.85717e+08	7.26091e+08	4.70226e+08	7.79305e+08	4.0503e+08	4.16762e+08	4.17423e+08	High	High	High	High	High	High
Master Protein	I1K670	Uncharacterized protein OS=Glycine max OX=3847 GN=GLYMA_05G219400 PE=3 SV=1	0	520.264	61	37	809	3	668	73.6	5.19	2147.78	37	5	1	2.505	4.219	0.305	0.915	1.388	0.645	0.240064	0.133728	0.0248943	0.938265	0.590471	0.260759	39.5	106.7	97.3	156.4	1.30568e+07	1.67359e+07	1.21426e+07	2.59879e+07	3.52398e+07	6.96437e+07	3.21355e+07	2.60244e+07	4.87518e+07	2.39794e+07	5.16501e+07	5.35367e+07	High	High	High	High	High	High
Master Protein	I1KPN3	Uncharacterized protein OS=Glycine max OX=3847 GN=547838 PE=3 SV=1	0	520.062	59	36	761	5	667	73.4	5.19	2048.04	36	8	0	8.08	62.633	0.211	1.005	3.191	0.432	0.00121669	1.51644e-11	0.0822936	0.996239	4.48837e-07	0.00176053	4	17.5	32.1	346.5	349252	668016	466926	1.21468e+06	2.05131e+06	5.19054e+06	2.54447e+07	1.12797e+06	3.7585e+06	5.20851e+07	4.06171e+07	2.3404e+07	High	Peak Found	Peak Found	High	High	High
Master Protein	I1NJ46	Importin subunit alpha OS=Glycine max OX=3847 GN=100797267 PE=3 SV=1	0	519.807	76	29	433	1	532	58.9	5.38	1448.3	29	20	0	1.127	1.401	0.847	0.994	1.172	0.804	0.99762	0.97317	0.999964	0.997086	0.956332	0.932779	84.7	101.2	95.4	118.7	2922959	2.45299e+06	2.22696e+06	2.6296e+06	3.29783e+06	2.93161e+06	2.76418e+06	2.69583e+06	3.27835e+06	2.20488e+06	3.43654e+06	5.05333e+06	High	High	High	Peak Found	High	Peak Found
Master Protein	I1LB65	Importin subunit alpha OS=Glycine max OX=3847 GN=100789135 PE=3 SV=1	0	519.807	76	29	439	1	532	59	5.38	1461.3	29	10	20	1.42	1.803	0.838	1.068	1.25	0.77	0.917614	0.857875	0.999964	0.916205	0.837894	0.772397	76.8	101	97.3	125	6.63233e+07	6.5726e+07	7.03352e+07	7.5079e+07	8.96171e+07	8.7242e+07	8.40281e+07	8.33356e+07	9.72134e+07	1.07946e+08	1.37481e+08	8.98992e+07	High	High	High	High	High	High
Master Protein	I1K668	Uncharacterized protein OS=Glycine max OX=3847 GN=GLYMA_05G219600 PE=3 SV=2	0	518.856	57	37	773	1	701	77.6	5.62	2027.84	37	5	2	1.476	2.135	0.535	0.954	1.093	0.98	0.880151	0.684135	0.509763	0.989201	0.982056	0.982511	95.2	100.3	104.7	99.8	7.22458e+07	8.71659e+07	9.2146e+07	9.19118e+07	8.21964e+07	1.38179e+08	9.58813e+07	8.72566e+07	1.12521e+08	9.14537e+07	9.9675e+07	8.99078e+07	Peak Found	Peak Found	Peak Found	Peak Found	Peak Found	High
Master Protein	I1MBD1	Clathrin heavy chain OS=Glycine max OX=3847 GN=100776763 PE=3 SV=2	0	517.269	36	47	381	1	1703	192.7	5.36	1039.75	47	14	1	3.276	4.931	0.324	1.12	1.172	0.969	0.412667	0.44904	0.514553	0.906675	0.974483	0.982854	11.2	110.4	127	151.4		99982.5	65748.1	865864	737606	797394	794085	917381	957598	1.1871e+06	709621	1.09363e+06	Not Found	Not Found	Not Found	Peak Found	Peak Found	Peak Found
Master Protein	I1NJA5	Pyruvate carboxyltransferase domain-containing protein OS=Glycine max OX=3847 GN=100812918 PE=3 SV=1	0	516.76	71	31	401	12	624	67.7	6.8	1248.19	31	20	21	0.877	0.867	1.058	0.877	0.894	0.992	0.757802	0.834549	0.856316	0.779496	0.875488	0.981543	121.8	101.8	91.3	85.2	2.17141e+08	2.35002e+08	2.4155e+08	2.08276e+08	1.85017e+08	1.96398e+08	1.76175e+08	1.97344e+08	1.70121e+08	1.66388e+08	1.64482e+08	1.47686e+08	High	High	High	High	High	High
Master Protein	I1LK30	Uncharacterized protein OS=Glycine max OX=3847 GN=100811630 PE=3 SV=1	0	516.441	80	21	1054	1	377	41.6	5.49	2682.34	21	11	0	7.171	6.729	0.153	1.079	1.031	0.831	0.0923059	0.315264	0.0507551	0.967018	0.996877	0.982511	20.2	131.5	112.7	135.6	109104	90549.2	32584.6	157025	590971	725084	782385	340701	506599	689861	425949	609285	Peak Found	Peak Found	Peak Found	Peak Found	High	High
Master Protein	I1MJ28	Uncharacterized protein OS=Glycine max OX=3847 GN=100819369 PE=3 SV=1	0	515.608	66	34	653	2	591	62.8	5.87	1782.41	34	15	35	1.453	1.973	0.67	1	1.214	0.817	0.895013	0.726878	0.86263	0.996018	0.893322	0.890022	90.9	98.2	100.8	110	5.11226e+08	4.34678e+08	3.88003e+08	4.64948e+08	4.85232e+08	4.69683e+08	4.81932e+08	3.81843e+08	5.05024e+08	4.56259e+08	5.25964e+08	6.0639e+08	High	High	High	High	High	High
Master Protein	A0A0R4J631	Pyruvate kinase OS=Glycine max OX=3847 GN=GLYMA_20G024800 PE=3 SV=1	0	515.565	74	31	550	8	502	54.3	7.2	1520.24	31	20	0	1.293	1.914	0.778	1.021	1.124	0.878	0.984775	0.886571	0.986529	0.987496	0.963895	0.976026	67.7	97.7	106.7	128	1.4769e+07	1.39798e+07	1.40266e+07	1.81847e+07	2.02407e+07	2.24359e+07	2.80061e+07	1.76942e+07	2.21005e+07	3.91904e+07	2.2772e+07	2.65215e+07	High	High	High	High	High	High
Master Protein	A0A0R0GHB3	HATPase_c domain-containing protein OS=Glycine max OX=3847 GN=100806710 PE=3 SV=1	0	515.101	63	42	433	11	797	90.4	5.26	1174.16	42	14	32	1.151	1.202	0.804	0.973	1.044	0.958	0.984201	0.990055	0.986529	0.996239	0.999952	0.991509	90.7	104.1	96.3	108.8	2.0942e+08	1.79283e+08	1.43994e+08	1.79791e+08	2.28179e+08	2.05931e+08	1.90504e+08	1.88373e+08	2.5629e+08	1.56438e+08	2.15194e+08	2.66245e+08	High	High	High	High	High	High
Master Protein	I1KG78	Ig-like domain-containing protein OS=Glycine max OX=3847 GN=100780156 PE=4 SV=1	0	514.875	60	40	554	16	857	94.7	5.39	1408.83	40	7	0	0.987	1.341	0.797	0.837	1.009	0.839	0.899193	0.999972	0.999879	0.668079	0.987729	0.950944	95.6	111.3	85.5	107.6	2.19375e+07	2.027e+07	1.934e+07	2.35911e+07	2.25685e+07	2.37237e+07	1.78173e+07	2.01248e+07	1.81398e+07	1.82574e+07	2.41306e+07	2.28171e+07	High	High	High	High	High	High
Master Protein	A0A0R0GKM7	Uncharacterized protein OS=Glycine max OX=3847 GN=100800328 PE=3 SV=1	0	514.214	57	56	425	3	1118	131	5.66	1048.92	56	14	52	1.372	1.694	0.74	0.989	1.102	0.888	0.94041	0.874291	0.944962	0.997086	0.974483	0.981329	94.9	101.7	104.4	99	1.03216e+08	1.16694e+08	9.93748e+07	1.30473e+08	1.10556e+08	1.04546e+08	9.76532e+07	1.16194e+08	1.13457e+08	1.58831e+08	1.07604e+08	9.39592e+07	High	High	High	High	High	High
Master Protein	I1N1W7	Uncharacterized protein OS=Glycine max OX=3847 GN=100777553 PE=3 SV=1	0	512.447	70	30	675	3	527	58.8	6.99	1827.16	30	18	31	1.15	1.144	0.91	0.995	1.041	0.907	0.983906	0.973578	0.971756	0.996239	0.999952	0.983378	111.6	89.4	90.1	108.9	6.9613e+08	5.5582e+08	6.17512e+08	4.55666e+08	5.25524e+08	4.948e+08	4.71803e+08	5.55222e+08	4.98459e+08	3.54123e+08	6.12412e+08	6.02943e+08	High	High	High	High	High	High
Master Protein	I1KVR6	Coatomer subunit beta OS=Glycine max OX=3847 GN=100814417 PE=4 SV=1	0	511.387	56	40	349	5	950	105.9	5.8	891	40	8	0	1.196	1.19	1.041	1.339	1.15	1.097	0.997285	0.975279	0.892946	0.0718184	0.954423	0.85625	116.4	84	108.1	91.6	1.30388e+07	2.03734e+07	2.19566e+07	1.72597e+07	1.18175e+07	1.4708e+07	1.89242e+07	2.18545e+07	1.4592e+07	1.97434e+07	1.60307e+07	1.5832e+07	High	High	High	High	High	High
Master Protein	C6T8Y2	Pyr_redox_2 domain-containing protein OS=Glycine max OX=3847 GN=100819919 PE=2 SV=1	0	510.287	74	26	828	26	478	52.1	8.22	2063.2	26	8	0	1.818	1.845	0.566	0.902	0.905	0.972	0.617789	0.804204	0.619141	0.896608	0.896203	0.983378	83.4	115.2	105.1	96.3	6.68087e+08	6.07239e+08	8.93289e+08	7.8224e+08	9.22345e+08	1.06908e+09	6.34148e+08	1.04081e+09	8.41939e+08	7.52186e+08	7.71036e+08	7.81674e+08	High	High	High	High	High	High
Master Protein	I1K8C9	Glycine cleavage system P protein OS=Glycine max OX=3847 GN=100814366 PE=3 SV=2	0	508.459	65	37	330	9	1023	111	7.36	1165.09	37	6	0	0.634	0.497	1.048	0.735	0.58	1.244	0.494344	0.433379	0.912226	0.164578	0.0991579	0.655916	137.8	126.2	72.3	63.7	9.13002e+06	7.78729e+06	8.73995e+06	1.00018e+07	8.00896e+06	5.72296e+06	4.01899e+06	6.41652e+06	4.58999e+06	4.31913e+06	4.03941e+06	1.53738e+06	High	High	High	High	High	High
Master Protein	I1MT23	CYTOSOL_AP domain-containing protein OS=Glycine max OX=3847 GN=100797187 PE=3 SV=1	0	507.536	69	32	397	10	570	59.8	7.14	1185.28	32	17	21	1.254	1.447	0.817	0.969	1.082	0.9	0.989987	0.947298	0.995512	0.996018	0.985677	0.982511	89.4	100.7	97.4	112.6	2.89711e+08	2.52355e+08	2.50019e+08	2.84363e+08	3.05451e+08	2.52626e+08	2.74903e+08	2.98039e+08	2.57855e+08	3.17883e+08	3.00617e+08	3.2885e+08	High	High	High	High	High	High
Master Protein	I1KWM7	6-phosphogluconate dehydrogenase, decarboxylating OS=Glycine max OX=3847 GN=100796103 PE=3 SV=1	0	506.763	69	27	610	3	486	53.5	6.48	1711.65	27	8	23	1.57	1.541	0.732	1.046	1.07	0.978	0.83002	0.926717	0.935737	0.952674	0.995104	0.982511	89.4	96.3	106.8	107.5	4.36927e+08	3.67949e+08	3.60804e+08	4.19382e+08	3.96088e+08	3.84106e+08	4.43213e+08	3.97439e+08	4.39514e+08	4.42082e+08	4.34223e+08	4.53472e+08	High	High	High	High	High	High
Master Protein	I1JIP5	T-complex protein 1 subunit eta OS=Glycine max OX=3847 GN=100784862 PE=3 SV=1	0	506.739	71	31	467	6	560	60.2	6.58	1313.11	31	2	30	0.999	1.155	0.929	0.97	1.091	0.881	0.88911	0.975279	0.959699	0.996018	0.983102	0.974404	82	96.6	97.4	124	2.20756e+08	1.69924e+08	1.5529e+08	2.00297e+08	2.1952e+08	1.89906e+08	2.46329e+08	1.8118e+08	2.01971e+08	2.72468e+08	2.57023e+08	2.3899e+08	High	High	High	High	High	High
Master Protein	I1LAL4	Uncharacterized protein OS=Glycine max OX=3847 GN=100788248 PE=3 SV=1	0	505.556	70	37	575	5	575	61.1	6.24	1454.54	37	10	8	1.555	1.686	0.682	0.958	1.17	0.796	0.844388	0.89939	0.883853	0.992472	0.943895	0.86841	74.8	99.8	103.8	121.7	4.68249e+07	3.56241e+07	3.67718e+07	4.46902e+07	5.51089e+07	4.90807e+07	5.10202e+07	4.38499e+07	5.25386e+07	5.98239e+07	5.4004e+07	6.07436e+07	High	High	High	High	High	High
Master Protein	I1MGE7	Ligase_CoA domain-containing protein OS=Glycine max OX=3847 GN=100795745 PE=4 SV=1	0	505.099	72	30	485	3	608	65.9	7.87	1259.62	30	15	1	0.878	0.862	1.053	0.892	0.931	1.055	0.820021	0.848906	0.837663	0.905023	0.935901	0.932779	111	104	89.3	95.6	2.37486e+07	2.89614e+07	2.51159e+07	3.08814e+07	2.35217e+07	1.6976e+07	1.98494e+07	2.45563e+07	2.02065e+07	2.16357e+07	1.5552e+07	2.30548e+07	High	High	High	High	High	High
Master Protein	I1JGR4	MI domain-containing protein OS=Glycine max OX=3847 GN=100789296 PE=4 SV=1	0	505.004	61	41	543	15	784	86.1	8	1369.3	41	2	29	1.257	1.611	0.661	0.872	0.978	0.918	0.988952	0.90227	0.846566	0.757844	0.963982	0.989404	94.7	111.5	96.1	97.6	2.03702e+08	2.07316e+08	1.58125e+08	2.41208e+08	2.39785e+08	2.17833e+08	2.09326e+08	2.06579e+08	1.9971e+08	1.80956e+08	2.09949e+08	2.20535e+08	High	High	High	High	High	High
Master Protein	A0A0R0L2F3	Uncharacterized protein OS=Glycine max OX=3847 GN=100778442 PE=3 SV=1	0	504.664	55	54	421	3	1117	130.9	5.72	1031.07	54	2	0	1.379	1.362	0.654	0.898	0.956	0.879	0.946065	0.97317	0.883173	0.92406	0.957982	0.981392	69	114.6	97.2	119.2	5.21696e+06	4.56872e+06	4.09446e+06	8.21142e+06	7.58914e+06	6.67131e+06	6.44102e+06	6.40164e+06	7.63158e+06	7.89667e+06	5.20379e+06	9.27326e+06	High	High	High	High	High	High
Master Protein	K7M9L4	Uncharacterized protein OS=Glycine max OX=3847 GN=100797877 PE=3 SV=1	0	502.947	54	42	401	13	1161	126.7	5.43	1138.13	42	15	0	2.044	2.38	0.482	0.94	1.096	0.882	0.55876	0.724406	0.515636	0.981606	0.97962	0.97601	71.6	108.3	102.4	117.8	1.73736e+07	1.58603e+07	1.34644e+07	2.07717e+07	2.39998e+07	2.51505e+07	2.55689e+07	2.26934e+07	2.05908e+07	2.61068e+07	2.66879e+07	2.59891e+07	High	High	High	High	High	High
Master Protein	I1MNU1	Uncharacterized protein OS=Glycine max OX=3847 GN=100819739 PE=3 SV=1	0	502.412	77	31	472	8	545	58.4	5.47	1368.08	31	16	28	0.933	1.059	1.017	0.948	1.077	0.9	0.83448	0.943342	0.891433	0.981606	0.988717	0.982511	103.5	101.3	97	98.3	3.69797e+08	3.04403e+08	2.81195e+08	3.19405e+08	2.98079e+08	2.58117e+08	2.94777e+08	2.73487e+08	2.85344e+08	3.71993e+08	2.56604e+08	2.89141e+08	High	High	High	High	High	High
Master Protein	I1KL72	Uncharacterized protein OS=Glycine max OX=3847 GN=100796791 PE=3 SV=1	0	502.144	56	32	762	4	677	72.4	6.04	1846.38	32	7	12	2.583	3.509	0.368	0.948	1.066	0.872	0.119186	0.116771	0.0480845	0.981606	0.996877	0.966172	84.5	108.8	103.2	103.6	1.15892e+08	1.14296e+08	1.01351e+08	1.17593e+08	1.55003e+08	1.47279e+08	1.39875e+08	1.1185e+08	1.39603e+08	1.22529e+08	1.40143e+08	1.77512e+08	High	High	High	High	High	High
Master Protein	A0A0R0L7Y1	Clathrin heavy chain OS=Glycine max OX=3847 GN=100808189 PE=3 SV=1	0	501.943	36	46	397	2	1660	188.7	5.4	1082.04	46	2	0	2.334	1.837	0.558	1.322	1.124	1.148	0.450598	0.901359	0.735485	0.249137	0.975042	0.862898	56.6	102.6	134.3	106.5	2.10819e+06	119678	4.25398e+06	4.26814e+06	2.73471e+06	3.82024e+06	3.66458e+06	6.6068e+06	5.00013e+06	1.2877e+06	4.78969e+06	3.96805e+06	High	Peak Found	High	High	High	High
Master Protein	I1N4I6	UDP-glucose 6-dehydrogenase OS=Glycine max OX=3847 GN=100803962 PE=3 SV=1	0	501.751	74	25	628	12	480	52.9	6.04	1731.33	25	18	14	0.706	0.594	1.065	0.793	0.665	1.209	0.390442	0.388653	0.848343	0.267706	0.141769	0.609586	124.5	110.3	91.4	73.8	1.37588e+09	1.36013e+09	1.24646e+09	1.38837e+09	1.09098e+09	1.20419e+09	9.98315e+08	8.93406e+08	1.00976e+09	7.2982e+08	8.1699e+08	8.05975e+08	High	High	High	High	High	High
Master Protein	I1N5D5	Uncharacterized protein OS=Glycine max OX=3847 GN=100811946 PE=3 SV=1	0	501.076	80	34	425	34	535	59	5.96	1179.27	34	18	0	1.094	1.413	0.889	1.023	1.194	0.881	0.957268	0.959221	0.986228	0.981606	0.915525	0.974829	97.8	99	103.9	99.2	2.93793e+08	2.2425e+08	2.0894e+08	2.27139e+08	2.3748e+08	1.93311e+08	2.49088e+08	1.91439e+08	2.38356e+08	2.27576e+08	2.22198e+08	2.83921e+08	High	High	High	High	High	High
Master Protein	I1KHC9	Uncharacterized protein OS=Glycine max OX=3847 GN=GLYMA_07G040100 PE=3 SV=1	0	500.839	63	28	425	12	775	81.7	6.58	1247.11	28	7	0	1.328	1.179	0.774	1.035	0.927	1.124	0.962351	0.980171	0.972597	0.967018	0.920901	0.792218	89.1	105.9	108.8	96.2	6.86668e+07	7.48598e+07	7.17156e+07	8.01094e+07	8.70974e+07	8.52359e+07	8.81904e+07	8.75639e+07	8.1023e+07	6.84579e+07	7.74484e+07	7.7604e+07	High	High	High	High	High	High
Master Protein	I1L5K0	WD_REPEATS_REGION domain-containing protein OS=Glycine max OX=3847 GN=100803927 PE=4 SV=1	0	500.786	46	37	381	11	1148	124.9	5.31	1158	37	9	25	1.305	1.199	0.64	0.919	0.902	1.062	0.971878	0.989464	0.802227	0.93802	0.893554	0.918306	91.4	105.2	103.9	99.4	1.33541e+08	1.57016e+08	1.41521e+08	1.88231e+08	1.62918e+08	1.54246e+08	1.63194e+08	1.60929e+08	1.53732e+08	1.87415e+08	1.2439e+08	1.53916e+08	High	High	High	High	High	High
Master Protein	I1KP32	UVR domain-containing protein OS=Glycine max OX=3847 GN=100795228 PE=3 SV=1	0	498.314	53	42	478	4	919	102.1	6.8	1312.73	42	8	0	0.958	0.833	1.113	0.962	1.049	0.834	0.860667	0.799268	0.785488	0.994467	0.999952	0.923675	87.2	100.7	106.5	105.6	1.66463e+08	1.22542e+08	1.03448e+08	1.15764e+08	1.55519e+08	1.41409e+08	1.49667e+08	1.45718e+08	1.68138e+08	2.72321e+07	1.48347e+08	2.06579e+08	High	High	High	High	Peak Found	High
Master Protein	I1LZ92	PfkB domain-containing protein OS=Glycine max OX=3847 GN=GLYMA_13G144800 PE=4 SV=1	0	498.205	79	20	484	9	341	37.5	5.44	1577.2	20	13	15	0.887	0.754	1.059	0.949	0.839	1.14	0.774138	0.6861	0.85469	0.981606	0.733037	0.778741	114.7	102.5	98.7	84	7.53956e+08	7.55505e+08	6.91105e+08	7.25356e+08	6.60899e+08	6.73905e+08	6.62257e+08	6.24557e+08	6.4896e+08	5.52074e+08	5.36053e+08	5.55566e+08	High	High	High	High	High	High
Master Protein	I1KMC2	Pyruvate kinase OS=Glycine max OX=3847 GN=100807615 PE=3 SV=1	0	498.138	72	31	558	8	501	54.3	7.59	1559.25	31	7	32	1.222	1.34	0.869	0.98	1.025	0.971	0.99762	0.975279	0.990068	0.997086	0.995447	0.983378	103.8	97.5	106.2	92.4	3.43521e+08	3.28634e+08	2.90701e+08	3.05521e+08	3.21722e+08	3.08625e+08	3.4587e+08	2.72005e+08	3.36251e+08	3.00465e+08	2.92598e+08	2.73717e+08	High	High	High	High	High	High
Master Protein	I1NBI4	AA_TRNA_LIGASE_II domain-containing protein OS=Glycine max OX=3847 GN=100782067 PE=3 SV=1	0	497.936	66	32	437	4	515	58.5	6.49	1151.75	32	19	0	0.763	0.656	1.167	0.873	0.797	1.132	0.691909	0.66604	0.83286	0.835702	0.625101	0.758597	126.4	97.4	94.7	81.5	1.34354e+07	1.37981e+07	1.39972e+07	1.28756e+07	1.06316e+07	9.07272e+06	8.04206e+06	1.14705e+07	1.03381e+07	2.00749e+07	8.89391e+06	7.02903e+06	High	High	High	High	High	High
Master Protein	I1LN30	Adenosylhomocysteinase OS=Glycine max OX=3847 GN=100787210 PE=3 SV=1	0	497.191	82	30	664	18	485	53.3	6.23	1357.83	30	11	0	1.266	1.036	0.568	0.721	0.592	1.223	0.984855	0.936435	0.624255	0.0281057	0.0320808	0.572741	78	115.7	123.3	83	1.34035e+08	1.08204e+08	1.20191e+08	2.03679e+08	1.78315e+08	1.75006e+08	2.06208e+08	1.10137e+08	1.90081e+08	1.2792e+08	1.80908e+08	4.53511e+07	High	High	High	High	High	High
Master Protein	I1MRV6	Uncharacterized protein OS=Glycine max OX=3847 GN=100788043 PE=4 SV=1	0	495.333	65	26	765	7	500	52.9	7.34	2191.3	26	17	0	2.162	1.765	0.534	1.105	1.059	0.961	0.322138	0.869622	0.522719	0.782297	0.998589	0.988979	61.1	119.4	106.8	112.6	5.87823e+07	5.09695e+07	4.67566e+07	7.22961e+07	1.02619e+08	9.96262e+07	8.90954e+07	8.98526e+07	8.85646e+07	7.71833e+07	9.39576e+07	1.33053e+08	High	High	High	High	High	High
Master Protein	O81413	Ferric leghemoglobin reductase-2 OS=Glycine max OX=3847 GN=547523 PE=2 SV=1	0	495.109	66	27	762	8	500	53	7.34	2203.67	27	7	24	1.49	1.627	0.684	0.989	1.099	0.908	0.87391	0.895259	0.883173	0.997086	0.976628	0.983514	84.8	112.4	98.6	104.2	4.80832e+08	4.74082e+08	4.96096e+08	5.22386e+08	6.42205e+08	6.3753e+08	5.30541e+08	6.28002e+08	5.59118e+08	5.90754e+08	5.88205e+08	6.73264e+08	High	High	High	High	High	High
Master Protein	A0A0R0IU60	Uncharacterized protein OS=Glycine max OX=3847 GN=100777674 PE=3 SV=1	0	495.042	67	34	719	2	592	62.8	6.04	1979.59	34	8	0	1.211	1.068	0.616	0.849	0.991	0.903	0.99894	0.953272	0.813872	0.74415	0.968096	0.989404	99.9	113.2	101.3	85.5	8.06164e+06	9.20678e+06	6.76455e+06	1.14245e+07	9.13913e+06	5.96112e+06	4.38715e+06	8.87157e+06	8.17528e+06	6.9037e+06	1.01092e+07	5.79622e+06	High	High	High	High	High	High
Master Protein	I1JGU8	Phospho-2-dehydro-3-deoxyheptonate aldolase OS=Glycine max OX=3847 GN=100797019 PE=3 SV=1	0	494.774	67	27	494	8	532	59	8.34	1384.97	27	2	24	0.96	0.733	0.829	0.783	0.633	1.297	0.862281	0.658645	0.998779	0.214563	0.0789983	0.39367	104.9	120.4	97.2	77.5	3.61303e+08	2.79753e+08	2.89247e+08	3.95238e+08	3.31992e+08	3.31574e+08	2.67908e+08	2.62996e+08	2.78662e+08	1.70615e+08	2.45261e+08	2.13715e+08	High	High	High	High	High	High
Master Protein	I1M2K9	Uncharacterized protein OS=Glycine max OX=3847 GN=GLYMA_13G254900 PE=3 SV=1	0	493.682	56	32	702	3	674	72.4	5.87	1776.41	32	13	0	6.882	16.572	0.147	0.994	1.98	0.466	0.000706876	0.000402225	0.000758609	0.997086	0.0767221	0.00507773	13.4	80.7	109.7	196.3	714564	1.10019e+06	349809	2.86332e+06	4.31376e+06	5.3437e+06	5.86509e+06	2.09634e+06	5.87018e+06	1.85787e+07	6.80008e+06	1.05008e+07	High	High	Peak Found	High	High	High
Master Protein	I1M561	PfkB domain-containing protein OS=Glycine max OX=3847 GN=100814192 PE=3 SV=1	0	493.031	84	24	986	9	331	35.4	5.45	2859.49	24	13	18	0.941	0.737	1.067	1.04	0.959	1.04	0.841273	0.664636	0.845884	0.963153	0.953361	0.934992	133.5	92.7	89.7	84.1	2.10162e+09	1.36065e+09	2.14066e+09	1.45895e+09	1.38424e+09	1.51015e+09	1.37597e+09	1.60542e+09	1.41172e+09	1.63741e+09	1.3235e+09	1.27698e+09	High	High	High	High	High	High
Master Protein	A0A0R0ESZ8	Elongation factor 1-alpha OS=Glycine max OX=3847 GN=100785429 PE=3 SV=1	0	491.212	70	27	1665	1	447	49.2	9.07	4497.7	27	19	30	1.436	2.049	0.807	0.881	1.193	0.703	0.905928	0.685863	0.988836	0.79764	0.915726	0.498077	63.9	106	92	138.2	1.11988e+09	1.18516e+09	9.15672e+08	1.5528e+09	1.85856e+09	1.94086e+09	1.75506e+09	1.48275e+09	1.61229e+09	3.35062e+09	1.8092e+09	2.42208e+09	High	High	High	High	High	High
Master Protein	I1KZ13	Uncharacterized protein OS=Glycine max OX=3847 GN=100811552 PE=3 SV=1	0	490.088	67	28	660	8	528	58.9	6.98	1779.53	28	8	0	1.164	1.28	0.743	0.924	0.971	0.987	0.989987	0.996849	0.955471	0.945542	0.957982	0.982511	94.1	110.6	103.2	92	4.67468e+07	5.21148e+07	4.99754e+07	5.87324e+07	6.16749e+07	5.39623e+07	5.48108e+07	5.36287e+07	5.99798e+07	4.88674e+07	5.4819e+07	3.85354e+07	High	High	High	High	High	High
Master Protein	I1MT11	MI domain-containing protein OS=Glycine max OX=3847 GN=100781275 PE=4 SV=1	0	489.002	61	40	516	15	789	86.8	7.59	1296.12	40	17	0	1.943	2.564	0.447	0.958	1.048	0.908	0.560575	0.569148	0.280104	0.994467	0.999952	0.983378	79.5	122.9	107	90.5	2.56799e+07	3.83464e+07	2.52077e+07	3.28897e+07	4.32529e+07	3.9698e+07	3.52711e+07	2.81618e+07	3.45466e+07	2.9229e+07	4.04736e+07	2.83175e+07	High	High	High	High	High	High
Master Protein	K7KA83	UBA_e1_C domain-containing protein OS=Glycine max OX=3847 GN=100811391 PE=3 SV=1	0	487.769	53	43	419	5	1092	120.5	5.25	1289.71	43	2	0	0.931	1.438	0.903	0.999	1.275	0.808	0.888449	0.969078	0.988014	0.996239	0.869469	0.918306	80.7	89.4	85	144.8	6.85905e+06	6.89613e+06	6.45841e+06	7.60024e+06	7.72779e+06	6.70009e+06	1.05765e+07	6.71219e+06	7.22366e+06	1.2309e+07	1.00711e+07	1.31337e+07	High	High	High	High	High	High
Master Protein	K7LBM2	Ligase_CoA domain-containing protein OS=Glycine max OX=3847 GN=100800904 PE=4 SV=1	0	486.868	71	30	492	4	608	66	7.87	1244.95	30	9	30	1.302	1.399	0.718	0.956	1.017	0.966	0.973145	0.962016	0.923679	0.989478	0.988464	0.984469	88.1	115.7	101	95.2	2.8956e+08	2.81555e+08	2.66457e+08	3.7151e+08	3.69416e+08	2.86022e+08	2.85177e+08	3.78786e+08	3.22627e+08	3.9054e+08	2.77128e+08	3.04097e+08	High	High	High	High	High	High
Master Protein	I1KPN5	Uncharacterized protein OS=Glycine max OX=3847 GN=GLYMA_08G025900 PE=3 SV=2	0	486	57	37	725	3	708	78	5.24	1905.58	37	8	32	2.069	2.271	0.513	0.915	1.078	0.862	0.389984	0.560822	0.44079	0.929494	0.988464	0.955407	68.6	93.4	117.7	120.2	3.5429e+08	4.03749e+08	4.10684e+08	4.84839e+08	5.49747e+08	9.88342e+08	6.92649e+08	4.72945e+08	7.37974e+08	4.8287e+08	8.04648e+08	7.07247e+08	High	High	High	High	High	High
Master Protein	I1MB71	Fructose-bisphosphate aldolase OS=Glycine max OX=3847 GN=GLYMA_14G189400 PE=3 SV=1	0	485.903	77	23	901	12	358	38.3	7.53	2395.65	23	14	6	1.189	1.231	0.858	1.016	1.014	0.972	0.99762	0.99941	0.998222	0.989478	0.987729	0.983378	85.1	106.5	105.5	103	1.20587e+09	1.06992e+09	9.65957e+08	1.14878e+09	1.38161e+09	1.33865e+09	1.42319e+09	1.11357e+09	1.32584e+09	1.29453e+09	1.27489e+09	1.50716e+09	High	High	High	High	High	High
Master Protein	I1M4W2	Uncharacterized protein OS=Glycine max OX=3847 GN=100787265 PE=3 SV=1	0	484.02	79	21	1040	2	377	41.7	5.49	2616.7	21	13	0	1.306	1.425	0.792	1.102	1.302	1.006	0.980418	0.980187	0.986228	0.842252	0.786818	0.966172	68.4	112	110.3	109.3	9.54945e+06	1.09169e+07	8.78602e+06	1.65516e+07	1.33722e+07	1.56323e+07	1.67492e+07	1.53922e+07	1.47594e+07	1.6295e+07	1.01811e+07	1.52528e+07	High	High	High	High	High	High
Master Protein	I1JGP8	CYTOSOL_AP domain-containing protein OS=Glycine max OX=3847 GN=100787686 PE=3 SV=1	0	483.984	69	31	429	9	570	59.6	7.12	1210.9	31	2	0	1.148	1.093	0.957	0.987	1.066	0.911	0.983732	0.949133	0.943128	0.997604	0.996599	0.989404	92.1	103.5	101.9	102.5	9.56179e+07	7.44485e+07	7.59439e+07	8.5315e+07	8.76824e+07	7.99803e+07	8.3983e+07	9.11437e+07	7.47911e+07	7.65574e+07	8.45173e+07	1.09523e+08	High	High	High	High	High	High
Master Protein	I1LLM2	Asparagine synthetase [glutamine-hydrolyzing] OS=Glycine max OX=3847 GN=GLYMA_11G171400 PE=4 SV=1	0	482.929	61	26	632	1	579	65.2	6.64	1494.85	26	11	20	3.44	4.905	0.442	1.4	1.904	0.685	0.0102775	0.0141992	0.196259	0.00840695	0.0206885	0.418894	38.8	84.1	144.1	132.9	6.7355e+07	5.04446e+07	8.2288e+07	1.06218e+08	1.6205e+08	1.45925e+08	5.65462e+07	2.49979e+08	2.73807e+08	3.74932e+08	2.00985e+08	2.30465e+08	High	Not Found	Peak Found	High	High	High
Master Protein	I1M5T2	Phospholipase D OS=Glycine max OX=3847 GN=100784434 PE=3 SV=1	0	481.873	65	43	446	30	807	92	6.34	1214.86	43	13	13	1.616	2.195	0.694	1.136	1.228	0.886	0.797751	0.606991	0.893818	0.666878	0.870729	0.978379	95.5	93.7	114.4	96.4	1.4903e+08	1.75676e+08	1.98863e+08	2.36268e+08	1.63374e+08	1.72405e+08	1.6649e+08	2.34039e+08	2.1053e+08	4.1489e+08	1.5906e+08	1.77426e+08	High	High	High	High	High	High
Master Protein	I1LLM7	Asparagine synthetase [glutamine-hydrolyzing] OS=Glycine max OX=3847 GN=GLYMA_11G170300 PE=4 SV=1	0	481.318	61	26	630	1	579	65.2	6.64	1486.31	26	11	0	12.47	35.103	0.077	1.204	3.189	0.355	1.02028e-05	2.17488e-06	1.2249e-06	0.612814	2.98789e-05	2.95024e-05	6.5	84.7	81	227.9	334932			1.48356e+06	4.67809e+06	4.36706e+06	1.7855e+06	4.17655e+06	9.40776e+06	1.49179e+07	5.18026e+06	1.1757e+07	Peak Found	Not Found	Not Found	High	High	Peak Found
Master Protein	A0A368UK08	Uncharacterized protein OS=Glycine max OX=3847 GN=GLYMA_12G010300 PE=4 SV=1	0	480.227	41	34	404	8	1097	119.3	5.15	1179.62	34		0	2.683	4.803	0.37	0.965	1.209	0.754	0.2471	0.103149	0.185388	0.996018	0.916007	0.796323	64	112.1	104	119.9	9.53291e+06	1.1462e+07	9.51111e+06	1.73922e+07	1.66985e+07	1.53069e+07	1.79641e+07	1.45505e+07	1.54928e+07	3.20862e+07	1.78597e+07	1.78138e+07	High	High	High	High	High	High
Master Protein	A0A0R0FJI5	Uncharacterized protein OS=Glycine max OX=3847 GN=GLYMA_16G008900 PE=3 SV=1	0	480.155	36	29	431	13	1427	152.8	6.54	1212.32	29	16	16	1.185	1.16	0.818	1.016	0.922	1.067	0.997285	0.976578	0.995512	0.989201	0.91688	0.906947	99.5	101.7	104	94.8	2.42756e+08	2.21258e+08	2.29181e+08	2.24363e+08	2.52304e+08	2.3431e+08	2.39542e+08	2.43574e+08	2.22244e+08	1.86679e+08	2.30243e+08	2.18415e+08	High	High	High	High	High	High
Master Protein	I1LUL9	Ketol-acid reductoisomerase OS=Glycine max OX=3847 GN=100799921 PE=3 SV=1	0	479.628	61	23	626	4	586	63.3	7.3	1839.44	23	12	23	0.961	0.778	1.026	1.018	0.873	1.173	0.862281	0.721941	0.883173	0.987496	0.826458	0.698093	109.5	105.7	96.7	88	5.68255e+08	4.84995e+08	4.70103e+08	4.99395e+08	4.6816e+08	3.73598e+08	4.282e+08	4.46076e+08	4.27398e+08	3.98904e+08	3.89864e+08	3.72244e+08	High	High	High	High	High	High
Master Protein	K7LD67	Uncharacterized protein OS=Glycine max OX=3847 GN=100777705 PE=3 SV=1	0	476.569	80	22	895	1	377	41.7	5.49	2246.58	22	9	2	1.918	3.337	0.579	0.931	1.523	0.664	0.708718	0.350313	0.761839	0.967129	0.421166	0.430455	49.3	102.7	93	155	4.94868e+06	4.32425e+06	2.44843e+06	6.41819e+06	1.03912e+07	9.00733e+06	9.36933e+06	8.16386e+06	7.36374e+06	3.70218e+07	1.05988e+07	1.36037e+07	High	High	High	High	High	High
Master Protein	I1M0B2	Uncharacterized protein OS=Glycine max OX=3847 GN=100791847 PE=4 SV=1	0	475.217	59	31	377	4	742	81.6	5.97	1162.62	31	13	0	1.631	2.2	0.592	0.968	1.144	0.86	0.87391	0.806163	0.767512	0.996018	0.963982	0.975139	101	93.1	84.7	121.2	7.83452e+06	1.09984e+07	7.99148e+06	9.15756e+06	7.36761e+06	6.2451e+06	6.69968e+06	9.1993e+06	5.8818e+06	1.30106e+07	9.45501e+06	9.58839e+06	High	High	High	High	High	High
Master Protein	I1LR60	Uncharacterized protein OS=Glycine max OX=3847 GN=GLYMA_12G078100 PE=3 SV=1	0	473.762	77	35	570	4	584	61.7	5.4	1597.18	35	12	29	0.977	1.153	0.939	1.011	1.054	0.961	0.87391	0.975279	0.952704	0.991693	0.999952	0.988942	106.5	95.3	97.6	100.6	3.89986e+08	3.14753e+08	3.17643e+08	3.17988e+08	2.83991e+08	2.76752e+08	3.31267e+08	2.59977e+08	2.91093e+08	2.99873e+08	2.75916e+08	3.57827e+08	High	High	High	High	High	High
Master Protein	I1MJU7	Uncharacterized protein OS=Glycine max OX=3847 GN=100800698 PE=3 SV=1	0	473.17	56	36	501	17	689	73.7	5.34	1448.51	36	16	19	1.387	1.49	0.663	0.915	0.978	0.966	0.935699	0.936435	0.84983	0.929494	0.963982	0.984782	87.2	107.4	102.4	103.1	3.5012e+08	3.61224e+08	3.25337e+08	4.16588e+08	4.31126e+08	4.92166e+08	4.3726e+08	3.83361e+08	4.11053e+08	3.27259e+08	4.14109e+08	4.45434e+08	High	High	High	High	High	High
Master Protein	K7K9D0	HP domain-containing protein OS=Glycine max OX=3847 GN=100788765 PE=4 SV=1	0	472.701	51	37	342	17	973	107.4	6	997.59	37	2	2	1.102	1.4	0.819	0.958	1.12	0.906	0.964664	0.966705	0.995512	0.992346	0.966864	0.984469	86.1	102.6	96.7	114.7	3.99525e+07	4.2777e+07	4.60434e+07	5.17747e+07	4.62163e+07	5.09724e+07	5.64509e+07	4.80455e+07	4.58668e+07	8.57811e+07	5.69823e+07	5.41679e+07	High	High	High	High	High	High
Master Protein	I1LBA2	AAA domain-containing protein OS=Glycine max OX=3847 GN=GLYMA_10G151900 PE=3 SV=1	0	471.286	79	32	432	1	423	47.4	5.11	1352.34	32	10	0	1.8	2.436	0.569	1.023	0.87	1.177	0.868426	0.821137	0.883173	0.99582	0.916007	0.861142	65.7	115.5	118.3	100.5	1.3589e+06	444045	922041	1.62134e+06	1.37913e+06	1.87674e+06	9.13106e+06	662925	1.65927e+06	1.08155e+06	1.41001e+06	4.75268e+06	High	Peak Found	High	High	High	Peak Found
Master Protein	I1KG47	D-3-phosphoglycerate dehydrogenase OS=Glycine max OX=3847 GN=100793819 PE=3 SV=1	0	471.149	69	27	456	9	623	66.2	7.71	1400.51	27	7	21	1.101	0.852	0.745	0.807	0.643	1.227	0.962952	0.820396	0.948681	0.349027	0.0956796	0.563565	95.8	120.1	104.3	79.7	1.99218e+08	1.84331e+08	1.42899e+08	2.32783e+08	2.3104e+08	2.21967e+08	2.00752e+08	1.55427e+08	2.08188e+08	1.23324e+08	1.53421e+08	1.79104e+08	High	High	High	High	High	High
Master Protein	A0A0R0ERR0	AAA domain-containing protein OS=Glycine max OX=3847 GN=100788486 PE=3 SV=1	0	470.77	79	32	441	1	423	47.4	5.11	1422.21	32	20	34	1.942	2.364	0.611	1.034	1.109	0.992	0.503409	0.509076	0.739398	0.967129	0.966864	0.981329	73	100.3	107.5	119.2	2.17227e+08	1.64953e+08	1.73486e+08	1.82746e+08	2.42679e+08	2.38358e+08	3.32404e+08	1.91488e+08	2.55452e+08	2.49289e+08	2.83868e+08	2.83402e+08	High	High	High	High	High	High
Master Protein	I1ME25	Uncharacterized protein OS=Glycine max OX=3847 GN=100814039 PE=3 SV=1	0	470.392	56	32	682	5	674	72.4	6	1753.45	32	15	28	1.914	2.416	0.539	0.943	1.106	0.872	0.529747	0.47895	0.521023	0.974213	0.970784	0.966483	90.3	108	98.6	103.1	4.69088e+08	4.66913e+08	3.9984e+08	4.59822e+08	6.06804e+08	5.58361e+08	5.09583e+08	4.71346e+08	5.11875e+08	4.20026e+08	5.32882e+08	6.14779e+08	High	High	High	High	High	High
Master Protein	I1KQV7	Uncharacterized protein OS=Glycine max OX=3847 GN=100811003 PE=3 SV=2	0	469.634	55	31	738	4	677	72.5	6.04	1788.89	31	8	0	7.095	8.663	0.107	0.777	0.928	0.64	0.000808826	0.0169572	2.65594e-06	0.511057	0.945154	0.568561	65.9	128.9	90.1	115.1	1.26745e+06	3.03586e+06	2.54771e+06	3.97948e+06	4.98057e+06	6.27315e+06	4.21247e+06	3.2016e+06	3.4845e+06	5.33334e+06	4.44829e+06	3.10001e+06	High	High	Peak Found	High	High	High
Master Protein	I1MZD3	PDZ domain-containing protein OS=Glycine max OX=3847 GN=100777219 PE=4 SV=2	0	468.415	52	44	403	9	1113	122.3	6.21	1063.06	44	18	35	1.056	1.001	0.914	0.94	0.894	1.042	0.935994	0.926437	0.969916	0.967859	0.875488	0.934063	99.5	107.6	101.3	91.6	1.13999e+08	1.11179e+08	1.06009e+08	1.21972e+08	1.20274e+08	1.06563e+08	1.17628e+08	1.13213e+08	1.00206e+08	1.02413e+08	9.46001e+07	1.04877e+08	High	High	High	High	High	High
Master Protein	I1M3M4	Ketol-acid reductoisomerase OS=Glycine max OX=3847 GN=GLYMA_13G291300 PE=3 SV=1	0	465.129	61	23	619	4	586	63.4	7.49	1829.58	23	13	0	2.628	5.092	0.301	1.083	1.103	0.914	0.344934	0.172813	0.0687208	0.921549	0.983775	0.991246	52.1	103.8	108.3	135.9	3.16605e+06	6.7706e+06	3.2396e+06	6.4577e+06	7.2594e+06	6.4418e+06	6.73629e+06	5.49216e+06	8.31511e+06	8.8192e+06	6.43963e+06	8.45776e+06	High	High	High	High	High	High
Master Protein	A0A0R0JTV5	Elongation factor 1-alpha OS=Glycine max OX=3847 GN=GLYMA_05G114900 PE=3 SV=1	0	465.041	70	27	1426	1	447	49.2	9.07	3747.48	27	5	1	0.784	0.906	1.185	0.957	0.98	0.977	0.742349	0.888628	0.80736	0.992912	0.966604	0.982511	117.5	94.2	90.7	97.6	8.39295e+06	1.10671e+07	8.35737e+06	8.40584e+06	5.74629e+06	6.72477e+06	4.31578e+06	7.77885e+06	6.47745e+06	1.0136e+08	6.97421e+06	444567	Peak Found	Peak Found	High	High	Peak Found	Peak Found
Master Protein	I1JJQ4	HATPase_c domain-containing protein OS=Glycine max OX=3847 GN=100794913 PE=3 SV=1	0	465.008	57	39	419	8	791	89.7	5.38	1147.56	39	2	0	0.903	0.891	1.103	0.973	1.05	0.905	0.837018	0.874291	0.779282	0.997086	0.999952	0.995201	122.5	97	91.8	88.7	2.25841e+07	2.77699e+07	1.99897e+07	1.78711e+07	2.00294e+07	1.43744e+07	1.39665e+07	1.69155e+07	1.87184e+07	1.78769e+07	1.63484e+07	1.48774e+07	High	High	High	High	High	High
Master Protein	I1J8V9	Succinate dehydrogenase [ubiquinone] flavoprotein subunit, mitochondrial OS=Glycine max OX=3847 GN=100803020 PE=3 SV=1	0	464.082	63	26	562	3	630	69.3	6.67	1600.72	26	1	0	1.514	1.335	0.588	0.917	0.871	1.071	0.87391	0.996048	0.725748	0.93802	0.842307	0.919741	109.6	108.2	94.3	87.9	3.49967e+07	2.73038e+07	3.41386e+07	2.82554e+07	3.49995e+07	3.37232e+07	2.93731e+07	2.83937e+07	2.98175e+07	3.48778e+07	2.7396e+07	1.61958e+07	High	High	High	High	High	High
Master Protein	I1KAB7	Protein disulfide-isomerase OS=Glycine max OX=3847 GN=100788687 PE=3 SV=1	0	464.017	74	29	409	10	503	56.1	4.98	1075.69	29	6	19	1.179	1.061	0.704	0.896	0.724	1.19	0.995087	0.943719	0.910871	0.863139	0.322071	0.660869	97.5	116.5	102.2	83.8	2.63999e+08	2.73474e+08	2.93792e+08	3.00566e+08	3.26531e+08	3.56438e+08	3.13288e+08	2.6783e+08	2.86444e+08	2.06636e+08	2.35017e+08	2.5649e+08	High	High	High	High	High	High
Master Protein	K7MQ84	Asparagine synthetase [glutamine-hydrolyzing] OS=Glycine max OX=3847 GN=GLYMA_18G061100 PE=4 SV=1	0	462.947	61	26	602	3	579	65.2	6.73	1432.45	26	18	1	8.873	31.429	0.19	1.149	3.595	0.369	0.000239222	2.23018e-06	0.0101781	0.769672	3.72626e-06	2.89232e-05	29.5	71.5	63.7	235.3	1.57062e+06	1.7127e+06	1.03953e+06	2.49606e+06	3.80971e+06	4.11802e+06	2.33238e+06	3.39685e+06	5.09257e+06	1.62375e+07	6.91216e+06	1.25397e+07	Peak Found	High	Peak Found	High	High	High
Master Protein	I1JV14	Uncharacterized protein OS=Glycine max OX=3847 GN=100781710 PE=3 SV=1	0	462.217	68	31	407	23	672	74.4	6.84	1274.69	31	4	10	1.336	1.794	0.679	0.852	1.105	0.739	0.956802	0.828393	0.879496	0.658695	0.972414	0.658904	84.3	114.5	87.6	113.6	1.42674e+08	1.33198e+08	1.64102e+08	1.76625e+08	1.93677e+08	2.02372e+08	1.3235e+08	2.00031e+08	1.48227e+08	2.77358e+08	1.92139e+08	1.70208e+08	High	High	High	High	High	High
Master Protein	A0A0R0IRH4	Phosphoglycerate kinase OS=Glycine max OX=3847 GN=GLYMA_08G165400 PE=3 SV=1	0	460.728	74	22	869	3	401	42.4	6.73	2452.32	22	8	17	0.886	0.816	1.141	1.011	0.973	1.039	0.771558	0.779756	0.753331	0.991415	0.963102	0.935549	116.8	91.8	91.5	99.9	1.21512e+09	9.1734e+08	1.01001e+09	7.9426e+08	9.56157e+08	6.78982e+08	8.98627e+08	7.88687e+08	7.90848e+08	6.553e+08	8.64001e+08	9.06457e+08	High	High	High	High	High	High
Master Protein	I1L905	Phenylalanine ammonia-lyase OS=Glycine max OX=3847 GN=GLYMA_10G058200 PE=3 SV=1	0	460.535	64	30	406	4	717	78.1	6.19	1190.15	30	10	27	0.904	0.731	0.712	0.651	0.546	1.242	0.798854	0.655005	0.913278	0.00091564	0.00880892	0.530052	108.8	116.8	91.4	83	3.33596e+08	3.05493e+08	3.08529e+08	4.32556e+08	3.16981e+08	3.31224e+08	2.81392e+08	2.55218e+08	2.5897e+08	1.5225e+08	2.35148e+08	2.72554e+08	High	High	High	High	High	High
Master Protein	C6TN36	Glyceraldehyde-3-phosphate dehydrogenase OS=Glycine max OX=3847 GN=100782924 PE=2 SV=1	0	459.289	79	22	1421	3	340	37	7.47	3540.77	22	18	0	1.04	0.745	1.104	1.108	0.904	1.409	0.925019	0.67487	0.797829	0.7749	0.895532	0.184415	96.2	102.1	110.7	91	1.42663e+08	1.16213e+08	8.88487e+07	1.57532e+08	1.23336e+08	1.12088e+08	1.89584e+08	1.07266e+08	1.33612e+08	1.09845e+08	1.06046e+08	1.09993e+08	High	High	High	High	High	High
Master Protein	A0A0R0JKX7	Uncharacterized protein OS=Glycine max OX=3847 GN=100796232 PE=4 SV=1	0	459.251	76	28	514	4	427	48.2	5.73	1248.13	28	6	27	1.042	0.908	0.968	0.952	1.03	0.962	0.926329	0.873032	0.933813	0.986532	0.996877	0.986181	117.6	100.1	92.1	90.3	3.63485e+08	3.05819e+08	3.22474e+08	2.79743e+08	2.74597e+08	2.53496e+08	2.34874e+08	2.94437e+08	2.52525e+08	3.00669e+08	2.47595e+08	1.99399e+08	High	High	High	High	High	High
Master Protein	K7M7P5	Phospho-2-dehydro-3-deoxyheptonate aldolase OS=Glycine max OX=3847 GN=GLYMA_14G176600 PE=3 SV=1	0	458.224	62	24	442	4	509	56.5	7.8	1256.17	24	14	1	1.042	1.115	0.551	0.744	0.697	1.084	0.935994	0.959797	0.701195	0.127786	0.280951	0.866887	107.6	122	85.9	84.6	23922754	2.00566e+07	1.77471e+07	2.61471e+07	2.27382e+07	2.16283e+07	1.60072e+07	1.5078e+07	1.94529e+07	1.25234e+07	1.57684e+07	2.52756e+07	High	High	High	High	High	High
Master Protein	I1NHR3	Coatomer subunit alpha OS=Glycine max OX=3847 GN=100805072 PE=4 SV=1	0	457.326	51	45	349	7	1218	136.8	7.01	865.05	45	20	1	1.646	1.842	0.622	1.07	1.149	0.733	0.86974	0.874257	0.860052	0.93802	0.962373	0.72648	95.7	83.1	92.1	129.1	3.96877e+06	8.47939e+06	7.84184e+06	8.9062e+06	6.69024e+06	6.80229e+06	5.79023e+06	8.67216e+06	7.54258e+06	1.82364e+07	8.32838e+06	1.05755e+07	High	High	High	High	High	High
Master Protein	E2FKH7	Sieve element occlusion f OS=Glycine max OX=3847 GN=SEOf PE=2 SV=1	0	456.916	61	40	492	8	698	80	6.83	1292.39	40	10	0	1.47	1.375	0.629	1.058	0.992	1.058	0.889133	0.972143	0.794311	0.929494	0.968969	0.919741	96.1	99	105.2	99.7	3.88262e+07	3.42252e+07	4.13908e+07	4.0313e+07	3.9965e+07	3.44343e+07	4.24817e+07	4.23914e+07	4.37565e+07	4.24129e+07	4.02594e+07	3.66715e+07	High	High	High	High	High	High
Master Protein	I1NF29	Uncharacterized protein OS=Glycine max OX=3847 GN=100820540 PE=4 SV=1	0	456.669	61	40	376	30	766	86.4	6.15	1012.7	40	20	10	1.107	1.185	0.887	0.945	0.95	1.008	0.964837	0.986679	0.986228	0.979269	0.94553	0.969294	110.8	103.1	95.6	90.5	1.2171e+08	1.24203e+08	1.23781e+08	1.22629e+08	1.05457e+08	1.15199e+08	1.05542e+08	1.11826e+08	1.06804e+08	1.2282e+08	1.01109e+08	8.19769e+07	High	High	High	High	High	High
Master Protein	I1KSQ0	Guanosine nucleotide diphosphate dissociation inhibitor OS=Glycine max OX=3847 GN=100784639 PE=3 SV=1	0	456.474	82	32	450	2	444	49.5	5.64	1256.2	32	8	33	1.216	1.176	0.863	0.988	1.007	0.942	0.99894	0.983851	0.994839	0.997086	0.983775	0.997906	96.7	94.7	103.2	105.4	3.45243e+08	3.22058e+08	4.30467e+08	3.23876e+08	3.3804e+08	3.67535e+08	3.6854e+08	3.90897e+08	3.33549e+08	4.41457e+08	3.7633e+08	3.38105e+08	High	High	High	High	High	High
Master Protein	I1LZ94	Phenylalanine ammonia-lyase OS=Glycine max OX=3847 GN=GLYMA_13G145000 PE=3 SV=1	0	456.388	64	30	392	4	716	78.1	6.1	1120.78	30	13	1	1.778	1.385	0.323	0.615	0.46	1.112	0.763039	0.982926	0.0529938	0.00123998	0.00068914	0.803561	152.2	120.3	73.9	53.6	2.28454e+07	2.38892e+07	1.61496e+07	2.43824e+07	1.73562e+07	1.80617e+07	9.36256e+06	1.10941e+07	1.25638e+07	5.5901e+06	8.04229e+06	9.25508e+06	High	High	High	High	High	High
Master Protein	Q01915	ATP synthase subunit alpha, mitochondrial OS=Glycine max OX=3847 GN=ATPA PE=3 SV=1	0	456.363	60	28	1279	25	508	55.3	6.61	2895.52	28	MT	4	1.31	1.504	0.814	1.007	1.164	0.858	0.968694	0.934549	0.993081	0.994897	0.936928	0.950919	109.5	94.7	94.8	100.9	1.68171e+09	1.14557e+09	1.37645e+09	1.19077e+09	1.43424e+09	1.10628e+09	1.1471e+09	1.3269e+09	1.19232e+09	1.56853e+09	1.16019e+09	1.26889e+09	High	High	High	High	High	High
Master Protein	I1LEI9	D-3-phosphoglycerate dehydrogenase OS=Glycine max OX=3847 GN=100819264 PE=3 SV=1	0	455.883	69	25	613	10	594	62.6	6.76	1671.07	25	10	0	0.852	0.868	1.046	0.912	0.975	0.984	0.712141	0.862979	0.869513	0.92489	0.962043	0.982511	93.5	106.4	109.5	90.6	5.18009e+07	6.42309e+07	4.52346e+07	6.077e+07	5.89602e+07	4.60888e+07	6.78763e+07	6.06368e+07	4.42271e+07	7.40446e+07	5.01996e+07	4.24253e+07	High	High	High	High	High	High
Master Protein	A0A0R4J656	Uncharacterized protein OS=Glycine max OX=3847 GN=100811995 PE=3 SV=1	0	455.806	67	33	538	6	575	61	6.7	1430.7	33	20	0	0.971	1.036	1.005	0.944	1.201	0.868	0.886214	0.932412	0.91204	0.981606	0.918108	0.976875	116	86.2	94.4	103.3	2.17796e+07	1.48641e+07	2.01835e+07	1.49861e+07	1.84867e+07	1.43821e+07	1.64273e+07	1.54822e+07	1.64343e+07	1.79745e+07	1.72073e+07	1.86435e+07	High	High	High	High	High	High
Master Protein	C6TD56	Glyceraldehyde-3-phosphate dehydrogenase OS=Glycine max OX=3847 GN=100807342 PE=2 SV=1	0	455.739	79	22	1419	3	340	37	7.47	3558.42	22	11	14	1.026	0.655	1.14	1.248	0.839	1.536	0.913589	0.512706	0.754235	0.185051	0.73383	0.0615181	119.7	95.5	112.3	72.5	1.02784e+09	1.09206e+09	9.19247e+08	8.3441e+08	8.20093e+08	6.87253e+08	1.28138e+09	7.74443e+08	9.64827e+08	6.23041e+08	6.03706e+08	6.75666e+08	High	High	High	High	High	High
Master Protein	A0A0R0EVM7	Glutamine synthetase OS=Glycine max OX=3847 GN=GLYMA_18G041100 PE=3 SV=1	0	454.437	87	21	683	8	356	39.1	5.73	2162.38	21	18	1	1.272	1.527	1.157	1.415	1.562	0.859	0.983732	0.9297	0.733098	0.00585644	0.24518	0.95138	91.1	79	119.3	110.6	8.83169e+07	1.43583e+08	1.33441e+08	1.15653e+08	1.0779e+08	1.40467e+08	1.14257e+08	1.97182e+08	1.74715e+08	2.98859e+08	1.61979e+08	1.53675e+08	High	High	High	High	High	High
Master Protein	I1JS35	FAD-binding PCMH-type domain-containing protein OS=Glycine max OX=3847 GN=100791439 PE=4 SV=2	0	453.953	62	30	567	15	595	65.5	7.2	1401.85	30	3	0	0.992	0.959	0.972	1.049	1.029	1.042	0.883252	0.891753	0.933813	0.946067	0.996877	0.926769	112.4	98	104.7	84.8	8.61401e+07	1.00835e+08	8.37081e+07	8.06762e+07	7.50983e+07	6.39009e+07	8.0224e+07	8.31234e+07	6.50665e+07	6.73912e+07	6.49972e+07	4.96405e+07	High	High	High	High	High	High
Master Protein	I1JD52	Uncharacterized protein OS=Glycine max OX=3847 GN=100793494 PE=3 SV=1	0	453.203	72	28	408	4	545	58.6	5.4	1183.27	28	2	0	0.73	0.806	1.394	0.952	1.207	0.758	0.559552	0.789829	0.433102	0.991307	0.911347	0.803561	114.8	93.2	82.7	109.3	2.84812e+07	2.40524e+07	2.28381e+07	2.12235e+07	1.95279e+07	1.65343e+07	1.73249e+07	1.71144e+07	1.82749e+07	2.47894e+07	1.82489e+07	2.28994e+07	High	High	High	High	High	High
Master Protein	A0A0R0FER5	Elongation factor 1-alpha OS=Glycine max OX=3847 GN=GLYMA_17G186600 PE=3 SV=1	0	451.151	68	26	1482	7	447	49.4	9.06	3792.71	26	17	3	0.467	0.541	1.512	0.745	0.919	0.845	0.0257872	0.284539	0.270937	0.0702406	0.91688	0.934063	183.6	110.6	54.6	51.2	4.13882e+08	7.0434e+08	5.68637e+08	4.02039e+08	3.42584e+08	1.64613e+08	1.22057e+08	3.58913e+08	1.69123e+08	7.78112e+08	1.58687e+08	6.8061e+07	High	High	High	High	High	High
Master Protein	I1L4U3	Peptidase_M3 domain-containing protein OS=Glycine max OX=3847 GN=100780377 PE=3 SV=2	0	451.028	59	36	315	11	787	88.4	6.3	944.3	36	9	25	1.321	1.193	0.896	1.01	1.071	0.91	0.964435	0.988585	0.980093	0.992912	0.994097	0.984469	100.8	96.4	96.1	106.6	1.27618e+08	1.13062e+08	1.14264e+08	1.09296e+08	1.1731e+08	9.57464e+07	1.16033e+08	1.08892e+08	1.07714e+08	1.28362e+08	1.1155e+08	1.2085e+08	High	High	High	High	High	High
Master Protein	I1LL25	Uncharacterized protein OS=Glycine max OX=3847 GN=100806471 PE=3 SV=1	0	450.625	76	33	568	2	584	61.7	5.34	1618.69	33	11	0	1.192	2.469	1.042	1.019	1.473	0.667	0.99762	0.700672	0.924888	0.994467	0.500169	0.401032	77	93.7	93.8	135.4	8.75316e+06	7.19595e+06	6.52303e+06	8.75139e+06	8.84987e+06	8.57576e+06	1.05376e+07	5.67355e+06	8.76358e+06	1.26504e+07	1.77874e+07	1.07383e+07	High	High	High	High	High	High
Master Protein	I1MSP4	Plasma membrane ATPase OS=Glycine max OX=3847 GN=100816905 PE=3 SV=2	0	449.292	34	31	349	4	953	104.8	6.87	944.27	31	17	1	1.374	1.782	0.742	1.085	1.339	0.897	0.945485	0.909489	0.948681	0.92792	0.768727	0.982511	61	92.1	112	134.9	3.26716e+06	2.68326e+06	3.61392e+06	4.92659e+06	5.06626e+06	4.04376e+06	4.0312e+06	5.99575e+06	6.31778e+06	1.08724e+07	5.80884e+06	7.21736e+06	High	Peak Found	High	High	High	High
Master Protein	I1MD61	PfkB domain-containing protein OS=Glycine max OX=3847 GN=100803713 PE=3 SV=1	0	448.888	86	23	863	8	330	35.4	5.19	2428.59	23	15	2	1.65	1.931	0.678	1.097	1.221	0.889	0.77091	0.755855	0.876658	0.813852	0.879883	0.982511	96.8	98	95.9	109.3	2.52072e+08	1.87347e+08	2.0473e+08	2.0719e+08	1.90064e+08	2.22146e+08	1.96579e+08	2.36007e+08	2.02899e+08	2.31075e+08	2.39867e+08	2.25335e+08	High	High	High	High	High	High
Master Protein	I1M2V7	Uncharacterized protein OS=Glycine max OX=3847 GN=100789909 PE=4 SV=1	0	448.879	76	37	471	5	669	75.5	7.11	1106.67	37	13	1	0.985	1.037	0.821	0.88	0.817	1.088	0.894123	0.934359	0.998779	0.852118	0.685139	0.906882	71.4	116.3	107.8	104.4	2.59482e+07	1.61619e+07	1.61218e+07	2.63153e+07	2.56009e+07	2.82575e+07	2.43972e+07	2.07149e+07	2.63952e+07	1.95616e+07	2.36148e+07	2.96886e+07	High	High	High	High	High	High
Master Protein	I1JPX8	Fructose-bisphosphate aldolase OS=Glycine max OX=3847 GN=100527532 PE=3 SV=1	0	448.337	82	24	629	19	358	38.5	6.79	1911.9	24	3	5	1.416	1.341	0.641	0.873	0.871	0.962	0.917628	0.975279	0.802383	0.767445	0.82126	0.986731	86.5	106.1	104.2	103.2	1.04382e+09	8.62049e+08	8.62351e+08	9.61166e+08	1.10547e+09	1.05715e+09	1.03917e+09	9.13127e+08	1.06428e+09	8.651e+08	1.02855e+09	1.12165e+09	High	High	High	High	High	High
Master Protein	I1JQT5	Uncharacterized protein OS=Glycine max OX=3847 GN=100794049 PE=4 SV=2	0	447.749	48	36	327	15	1195	130.4	5.57	853.71	36	3	0	0.891	0.976	1.013	0.85	0.887	0.964	0.827545	0.91545	0.883173	0.722416	0.88139	0.983378	101.4	111.3	98	89.3	2.28508e+07	2.76626e+07	2.19913e+07	2.50796e+07	2.50689e+07	2.4139e+07	2.39292e+07	2.20705e+07	2.09284e+07	1.66252e+07	2.01102e+07	2.28696e+07	High	High	High	High	High	High
Master Protein	I1JXA0	Uncharacterized protein OS=Glycine max OX=3847 GN=100798680 PE=4 SV=1	0	447.131	33	29	525	1	814	90.8	5.24	1409.55	29	4	0	3.624	3.49	0.208	0.858	0.974	0.9	0.1118	0.55133	0.0171592	0.83939	0.974483	0.984906	30.6	151.8	110.8	106.7	2389566	1.05991e+06	734319	3.5321e+06	5.26174e+06	5.37874e+06	3.84089e+06	3.032e+06	4.73561e+06	3.43866e+06	5.26222e+06	3.69914e+06	Peak Found	Peak Found	Peak Found	Peak Found	Peak Found	Peak Found
Master Protein	C6T857	Isocitrate dehydrogenase [NADP] OS=Glycine max OX=3847 GN=100786103 PE=2 SV=1	0	447.058	76	29	923	2	413	46.1	6.23	1976.14	29	2	29	1.283	1.268	0.832	1.05	0.965	1.068	0.979252	0.995232	0.998779	0.945542	0.957982	0.90586	97.2	99.1	97.7	106	1.30997e+09	8.7829e+08	1.14515e+09	1.20243e+09	1.052e+09	1.16832e+09	1.35824e+09	1.10959e+09	1.15105e+09	1.24908e+09	1.10434e+09	1.25261e+09	High	High	High	High	High	High
Master Protein	A0A368UH36	Phosphoglycerate kinase OS=Glycine max OX=3847 GN=GLYMA_15G262100 PE=3 SV=1	0	446.998	76	22	856	3	401	42.4	6.32	2408	22		0	0.754	2.207	1.178	1.112	1.11	1.176	0.509135	0.647917	0.71401	0.739222	0.965028	0.671503	147.5	83	96.4	73.2	6.72215e+07	1.15777e+07	7.173e+07	6.28131e+07	3.78158e+07	3.01061e+07	4.3927e+07	4.91514e+07	3.93535e+07	4.16057e+07	3.33542e+07	3.03843e+07	High	High	High	High	High	High
Master Protein	I1KM00	Uncharacterized protein OS=Glycine max OX=3847 GN=100775519 PE=4 SV=1	0	446.672	63	33	687	9	588	65.8	6.9	1631.14	33	7	31	2.186	3.034	0.481	1.005	1.293	0.632	0.309024	0.223264	0.321144	0.99582	0.761119	0.206445	56.5	103	107.8	132.6	3.59109e+08	2.81964e+08	5.11923e+08	5.35368e+08	6.5451e+08	7.13287e+08	3.92662e+08	6.97334e+08	6.84592e+08	8.42509e+08	7.27746e+08	8.75954e+08	High	High	High	High	High	High
Master Protein	I1K489	Guanosine nucleotide diphosphate dissociation inhibitor OS=Glycine max OX=3847 GN=GLYMA_05G167800 PE=3 SV=1	0	446.053	73	31	442	1	444	49.6	5.64	1238.66	31	5	0	0.01	8.328	100		100	0.01	1.74058e-16	0.00909267	1.83145e-16		2.32487e-16	2.5378e-16	41			359	415570	1.88198e+06	1.46592e+06							1.28465e+07	304716	1.5673e+07	Peak Found	High	Peak Found	High	Not Found	Not Found
Master Protein	I1JZW5	Aldedh domain-containing protein OS=Glycine max OX=3847 GN=GLYMA_05G033500 PE=3 SV=1	0	444.933	73	23	381	20	488	52.8	5.4	1282.97	23	5	0	1.199	1.063	0.882	1.041	0.968	1.097	0.998264	0.945475	0.986228	0.960671	0.959679	0.854201	113.6	96.9	101.1	88.3	2.6773e+08	2.34578e+08	2.48088e+08	2.11682e+08	2.34826e+08	1.99812e+08	2.20786e+08	2.06992e+08	2.48199e+08	2.81911e+08	1.92909e+08	1.78858e+08	High	High	High	High	High	High
Master Protein	I1N4U1	6-phosphogluconate dehydrogenase, decarboxylating OS=Glycine max OX=3847 GN=547455 PE=3 SV=1	0	444.867	70	27	586	3	486	53.6	5.9	1580.17	27	18	0	1.604	1.407	0.592	0.947	0.837	1.131	0.86974	0.986763	0.80736	0.985104	0.735817	0.773845	67.2	114	107.9	110.8	9634406	7.76901e+06	7.98432e+06	1.44769e+07	1.31236e+07	1.35401e+07	1.24645e+07	1.28173e+07	1.33465e+07	1.50042e+07	1.13362e+07	1.31585e+07	High	Peak Found	High	High	High	High
Master Protein	I1LVA7	Uncharacterized protein OS=Glycine max OX=3847 GN=100775641 PE=4 SV=1	0	444.574	74	37	463	5	669	75.6	7.11	1071.14	37	12	36	1.32	1.379	0.755	0.909	0.917	0.966	0.964664	0.965845	0.955983	0.916471	0.915525	0.984782	114.4	108.3	97.5	79.9	2.06217e+08	1.9544e+08	1.48483e+08	1.93835e+08	1.85e+08	1.79959e+08	1.66549e+08	1.18149e+08	1.81234e+08	1.35955e+08	1.36484e+08	1.57865e+08	High	High	High	High	High	High
Master Protein	I1LHR7	Succinate dehydrogenase [ubiquinone] flavoprotein subunit, mitochondrial OS=Glycine max OX=3847 GN=100818379 PE=3 SV=1	0	444.321	63	26	563	3	630	69.1	6.71	1587.45	26	11	26	1.231	1.059	0.771	0.887	0.797	1.077	0.997285	0.943342	0.969916	0.826824	0.58868	0.891825	104.1	109	98.8	88.1	2.62892e+08	3.00838e+08	2.89697e+08	2.75542e+08	3.03437e+08	3.04257e+08	2.877e+08	2.75e+08	2.63082e+08	2.84095e+08	2.45181e+08	2.16091e+08	High	High	High	High	High	High
Master Protein	I1NFX7	D-3-phosphoglycerate dehydrogenase OS=Glycine max OX=3847 GN=100808771 PE=3 SV=1	0	443.936	72	27	525	12	595	62.8	6.58	1462.56	27	20	16	1.061	0.966	0.895	0.931	1.007	0.915	0.93997	0.90804	0.980936	0.959421	0.983775	0.986396	111.4	101.1	98.8	88.8	2.62822e+08	2.60721e+08	2.63944e+08	2.52982e+08	2.3855e+08	2.01534e+08	2.50477e+08	2.33081e+08	2.01957e+08	2.4315e+08	2.09625e+08	2.08118e+08	High	High	High	High	High	High
Master Protein	I1MK72	Aminotran_1_2 domain-containing protein OS=Glycine max OX=3847 GN=GLYMA_16G013900 PE=4 SV=1	0	443.073	62	27	399	6	536	59.4	6.58	1191.39	27	16	25	1.08	1.034	0.979	1.017	0.976	1.026	0.947525	0.936139	0.924852	0.987496	0.963895	0.95107	95.2	101.8	100.8	102.2	3.16799e+08	3.39874e+08	2.66474e+08	3.3784e+08	3.5122e+08	3.38708e+08	3.13963e+08	3.35628e+08	3.4904e+08	2.16353e+08	3.40311e+08	3.77594e+08	High	High	High	High	High	High
Master Protein	A0A0R0JW92	Uncharacterized protein OS=Glycine max OX=3847 GN=GLYMA_05G156900 PE=4 SV=1	0	442.738	62	32	244	4	932	103.7	4.83	665.52	32	5	0	1.13	1.024	1.067	1.293	1.111	1.156	0.99762	0.962445	0.924971	0.412909	0.99655	0.850564	104	91.2	119	85.8	2.21234e+06	3.37195e+06	2.59544e+06	3.41498e+06	2.27485e+06	1.41628e+06	2.44669e+06	2.97029e+06	3.44154e+06	7.25285e+06	2.13996e+06	2.01773e+06	High	High	High	High	High	Peak Found
Master Protein	K7LAK1	MI domain-containing protein OS=Glycine max OX=3847 GN=100796636 PE=4 SV=1	0	442.033	41	47	289	23	1835	197.7	7.43	633.17	47	8	24	2.29	3.11	0.442	0.897	1.131	0.793	0.240654	0.260882	0.212291	0.870642	0.959806	0.85664	86.4	111.8	93.8	108	6.88124e+07	6.87533e+07	7.89221e+07	7.4066e+07	8.90971e+07	9.01361e+07	7.47697e+07	7.21718e+07	7.4803e+07	8.12914e+07	8.60133e+07	8.83268e+07	High	High	High	High	High	High
Master Protein	I1LME4	PDZ domain-containing protein OS=Glycine max OX=3847 GN=100809144 PE=4 SV=1	0	441.111	50	41	389	6	1113	122.2	6.15	1058.22	41	11	0	1.342	1.256	0.754	0.94	1.042	0.86	0.954717	0.999972	0.955983	0.968908	0.999952	0.952016	87	103.5	98.9	110.6	1.48048e+08	7.68815e+07	1.02001e+08	1.19426e+08	1.2231e+08	1.21372e+08	1.25525e+08	8.35616e+07	1.16042e+08	1.66013e+08	9.53884e+07	1.29741e+08	High	High	High	High	High	High
Master Protein	I1JHE4	Asparagine synthetase [glutamine-hydrolyzing] OS=Glycine max OX=3847 GN=GLYMA_02G228100 PE=4 SV=1	0	440.872	74	29	530	10	582	65.6	6.47	1205.71	29	2	21	2.761	2.668	0.564	1.462	1.466	0.898	0.0742776	0.36193	0.611641	0.00191716	0.406775	0.982511	45.3	86.4	127.9	140.4	2.66812e+08	2.29615e+08	2.50391e+08	3.25288e+08	5.5209e+08	4.77963e+08	3.02603e+08	7.07756e+08	8.49822e+08	7.77831e+08	5.12488e+08	7.76582e+08	High	High	High	High	High	High
Master Protein	I1NJ85	Uncharacterized protein OS=Glycine max OX=3847 GN=100806844 PE=3 SV=1	0	440.704	82	31	432	10	636	67.4	6.98	1248.21	31	20	21	1.441	1.713	0.758	1.042	1.106	0.93	0.901987	0.869312	0.959168	0.959621	0.970497	0.997603	99.9	91.3	98.1	110.7	1.73199e+08	1.85907e+08	1.95048e+08	1.69862e+08	1.55702e+08	1.79292e+08	2.33432e+08	1.82569e+08	1.58447e+08	2.75475e+08	2.06009e+08	1.77391e+08	High	High	High	High	High	High
Master Protein	I1M599	Lipoxygenase OS=Glycine max OX=3847 GN=GLYMA_13G347800 PE=3 SV=1	0	439.985	43	32	705	1	822	92.7	7.01	1542.26	32	13	0	1.53	2.301	0.955	1.364	2.156	0.655	0.946065	0.867417	0.964903	0.672504	0.282022	0.801509	85.1	78.4	89.2	147.3	203759	504598	433908	400145	229734	528520	772141	313444	455034	1.07676e+06	524068		Peak Found	High	High	Peak Found	High	High
Master Protein	I1KVH4	Uncharacterized protein OS=Glycine max OX=3847 GN=100795759 PE=4 SV=1	0	437.793	48	42	346	2	1133	124.6	7.11	843.97	42	8	1	0.961	1.123	0.821	1.033	0.89	1.222	0.910011	0.975611	0.990702	0.981606	0.92482	0.696407	118.4	103.3	105.8	72.4	4.89464e+06	8.26049e+06	7.55926e+06	9.12777e+06	6.59548e+06	4.89741e+06	4.99952e+06	8.40054e+06	6.75407e+06	1.09614e+07	4.62152e+06	3.78721e+06	Peak Found	Peak Found	Peak Found	High	High	High
Master Protein	I1J4X9	Peptidase_M3 domain-containing protein OS=Glycine max OX=3847 GN=100776634 PE=3 SV=1	0	437.388	56	32	332	7	787	88.4	6.44	1025.5	32	1	0	0.982	1.522	0.914	0.937	1.081	0.854	0.905841	0.953509	0.979243	0.973743	0.996877	0.964684	91.1	104	98.6	106.3	9.86742e+06	2.79165e+07	8.46153e+06	1.12589e+07	1.34195e+07	9.43351e+06	9.38924e+06	1.06775e+07	1.1442e+07	9.47926e+06	1.15095e+07	1.22243e+07	High	High	High	High	High	High
Master Protein	I1LHN4	Uncharacterized protein OS=Glycine max OX=3847 GN=100803268 PE=3 SV=1	0	436.234	64	30	380	14	657	73.2	5.85	1140.62	30	11	16	1.048	1.104	0.928	1.021	1.016	0.969	0.93104	0.962309	0.959835	0.981758	0.988464	0.983555	106.1	97.4	99.1	97.4	1.56081e+08	1.38844e+08	1.57471e+08	1.56494e+08	1.38689e+08	1.43339e+08	1.2385e+08	1.5926e+08	1.45802e+08	1.57308e+08	1.32416e+08	1.43256e+08	High	High	High	High	High	High
Master Protein	I1KVS6	D-3-phosphoglycerate dehydrogenase OS=Glycine max OX=3847 GN=100817949 PE=3 SV=1	0	433.367	65	23	431	5	621	66	6.9	1299.56	23	8	0	0.793	0.717	0.861	0.797	0.694	1.078	0.734056	0.737821	0.996963	0.457093	0.270565	0.871465	124.5	109.1	102.1	64.3	1.5006e+07	1.83935e+07	1.09418e+07	1.36079e+07	1.31576e+07	1.0636e+07	1.23072e+07	9.28371e+06	1.33587e+07	7.74869e+06	5.47927e+06	1.0944e+07	High	High	High	High	High	High
Master Protein	I1LIN0	Uncharacterized protein OS=Glycine max OX=3847 GN=100815181 PE=3 SV=1	0	432.424	77	25	360	7	513	56.3	7.83	1124.39	25	11	18	1.203	1.071	1.054	1.147	1.106	0.986	0.99894	0.949133	0.861743	0.618051	0.970772	0.982511	104.8	104.9	104.6	85.7	4.59817e+08	3.04651e+08	3.96345e+08	3.82603e+08	4.19496e+08	3.96508e+08	5.78193e+08	3.87785e+08	3.95441e+08	2.74942e+08	3.23918e+08	3.7998e+08	High	High	High	High	High	High
Master Protein	I7FST9	Protein disulfide-isomerase OS=Glycine max OX=3847 GN=Gm pdil-1 PE=2 SV=1	0	431.413	67	27	377	8	525	58.7	5.17	1002.89	27	4	0	1.815	1.705	0.526	0.955	0.913	1.157	0.620966	0.886571	0.485575	0.989478	0.913895	0.746923	94.7	113.1	106.9	85.3	9.2016e+07	1.10412e+08	8.96825e+07	1.03214e+08	1.09901e+08	1.21124e+08	1.13586e+08	9.71085e+07	1.03871e+08	8.13316e+07	8.28403e+07	1.10431e+08	High	High	High	High	High	High
Master Protein	I1KHJ4	Aminotran_1_2 domain-containing protein OS=Glycine max OX=3847 GN=100776235 PE=4 SV=1	0	431.15	62	26	400	5	541	59.9	6.83	1192.78	26	7	0	2.148	1.752	0.461	1.004	0.916	1.104	0.404346	0.887267	0.319733	0.994897	0.915902	0.862898	83.4	108.1	112.6	95.9	38894627	3.0684e+07	3.19727e+07	4.06748e+07	4.14104e+07	4.94114e+07	4.75685e+07	4.00737e+07	4.3149e+07	3.4516e+07	3.67673e+07	5.63494e+07	High	High	High	High	High	High
Master Protein	I1LQ46	Coatomer subunit gamma OS=Glycine max OX=3847 GN=100789362 PE=3 SV=1	0	431.106	63	40	264	6	887	98.7	5.16	670.24	40	12	33	1.533	1.989	0.689	1.116	1.42	0.749	0.855787	0.774289	0.896836	0.745777	0.491359	0.71337	78.6	85.9	102	133.5	4.66946e+07	6.4918e+07	6.23192e+07	7.93822e+07	6.80724e+07	5.51781e+07	8.08517e+07	8.07971e+07	7.78656e+07	1.77045e+08	8.9522e+07	1.05816e+08	High	High	High	High	High	High
Master Protein	I1KVD4	Uncharacterized protein OS=Glycine max OX=3847 GN=100785358 PE=4 SV=1	0	430.684	79	26	450	1	426	48.2	5.74	1151.06	26	8	0		100			100	0.01		1.52446e-16			2.32487e-16	2.5378e-16				400										4.35577e+06			Not Found	Not Found	Not Found	Not Found	Not Found	Not Found
Master Protein	I1N3E5	Epimerase domain-containing protein OS=Glycine max OX=3847 GN=GLYMA_18G220500 PE=4 SV=1	0	430.363	84	26	401	3	327	36	5.77	1110.44	26	18	2	1.216	1.171	1.106	1.096	1.012	1.121	0.99762	0.97363	0.807064	0.835106	0.99141	0.829115	78.4	101.9	113.9	105.9	3.04203e+07	2.43389e+07	2.45634e+07	3.38852e+07	2.94592e+07	3.19326e+07	5.089e+07	3.56878e+07	3.42811e+07	3.98073e+07	3.31507e+07	3.31759e+07	High	High	High	High	High	High
Master Protein	I1NBD7	Uncharacterized protein OS=Glycine max OX=3847 GN=100815384 PE=4 SV=1	0	429.57	45	36	317	15	1195	130	5.68	765.25	36	19	22	1.186	1.236	0.707	0.856	0.941	0.935	0.997285	0.99119	0.913278	0.674366	0.937792	0.997906	83.6	106.4	94	115.9	7.54342e+07	8.38183e+07	7.15717e+07	1.03934e+08	9.59583e+07	8.71448e+07	8.47898e+07	8.51158e+07	8.37979e+07	1.15952e+08	8.41671e+07	1.04536e+08	High	High	High	High	High	High
Master Protein	I1L9B1	Lysine--tRNA ligase OS=Glycine max OX=3847 GN=GLYMA_10G069800 PE=3 SV=1	0	428.379	66	33	462	5	596	68.1	6.47	1142.51	33	10	2	0.939	1.277	0.951	0.947	1.386	0.767	0.87391	0.996131	0.947228	0.986416	0.595454	0.836973	98.5	85.6	77	139	2.02601e+07	1.27679e+07	1.80058e+07	1.54466e+07	2.05967e+07	1.5645e+07	1.23808e+07	1.40761e+07	2.39977e+07	2.86415e+07	2.54106e+07	1.69624e+07	High	High	High	High	High	High
Master Protein	A0A0R0JYS9	Peroxidase OS=Glycine max OX=3847 GN=GLYMA_05G103600 PE=3 SV=1	0	427.626	72	18	1140	4	325	35.5	8.76	2836.45	18	5	0	0.767	0.518	1.218	0.997	0.777	1.343	0.538417	0.241981	0.649141	0.996239	0.510325	0.294615	128.5	112.1	101.8	57.5	4.73124e+08	3.66822e+08	5.89072e+08	4.26321e+08	3.51877e+08	4.12639e+08	3.11347e+08	3.96309e+08	3.74736e+08	2.07245e+08	3.02204e+08	2.11775e+08	High	High	High	High	High	High
Master Protein	I1JH86	Fructose-bisphosphate aldolase OS=Glycine max OX=3847 GN=GLYMA_02G222400 PE=3 SV=1	0	427.431	82	21	894	11	358	38.2	7.55	2370.07	21	2	0	0.98	0.867	0.979	0.944	0.948	1.037	0.87391	0.834549	0.924835	0.976957	0.944974	0.938641	120.9	105.4	93.9	79.8	1.06941e+09	1.13433e+09	1.14609e+09	1.014e+09	9.89337e+08	9.82686e+08	8.77782e+08	9.52811e+08	8.81697e+08	7.48825e+08	9.39771e+08	6.17906e+08	High	High	High	High	High	High
Master Protein	Q06197	Isocitrate dehydrogenase [NADP] OS=Glycine max OX=3847 GN=IDH1 PE=1 SV=2	0	426.978	72	28	830	1	413	46	6.23	1835.52	28	14	0	0.673	0.448	1.719	1.188	0.791	1.503	0.4392	0.263616	0.179605	0.539476	0.581269	0.111275	148.9	84.3	100.2	66.7	2.40673e+07	2.68874e+07	1.90532e+07	1.35409e+07	1.56384e+07	1.36302e+07	1.61919e+07	1.89197e+07	9.99293e+06	1.07756e+07	1.36345e+07	58619.2	High	High	High	High	High	High
Master Protein	P30081	Chalcone synthase 7 OS=Glycine max OX=3847 GN=CHS7 PE=3 SV=1	0	426.847	66	21	642	6	389	42.8	6.37	1591.38	21	1	22	0.541	0.47	1.166	0.839	0.55	1.454	0.0879983	0.160349	0.723888	0.579743	0.0100926	0.128692	170	90.6	84.4	55	7.40719e+08	7.40249e+08	6.75592e+08	6.0209e+08	3.85776e+08	3.94331e+08	5.08905e+08	2.116e+08	3.67421e+08	2.39582e+08	2.06676e+08	2.45304e+08	High	High	High	High	High	High
Master Protein	I1LM73	UTP--glucose-1-phosphate uridylyltransferase OS=Glycine max OX=3847 GN=100794066 PE=3 SV=1	0	425.592	82	30	772	17	475	51.9	5.49	1792.26	30	11; 13	1	0.983	1.007	1.11	1.12	0.995	1.17	0.87391	0.928481	0.789258	0.730997	0.97523	0.706041	110	93.1	105.7	91.2	2.15062e+08	1.58532e+08	1.83872e+08	1.48369e+08	1.6853e+08	1.55669e+08	1.76636e+08	1.45021e+08	1.94078e+08	1.2826e+08	1.52433e+08	1.58899e+08	High	High	High	High	High	High
Master Protein	B0M1A9	Peroxisomal 3-ketoacyl-CoA thiolase OS=Glycine max OX=3847 GN=100170734 PE=2 SV=1	0	424.997	59	21	404	4	463	48.6	7.8	1353.14	21	10	20	0.927	0.979	1.076	0.936	1.05	0.894	0.827545	0.914855	0.834244	0.967018	0.999952	0.982511	105.4	95.7	95.6	103.3	2.89241e+08	2.4299e+08	3.05324e+08	2.13781e+08	2.62678e+08	2.62697e+08	2.62506e+08	2.69828e+08	2.30743e+08	2.58526e+08	3.00383e+08	2.83463e+08	High	High	High	High	High	High
Master Protein	I1JUD5	Uncharacterized protein OS=Glycine max OX=3847 GN=100808957 PE=4 SV=1	0	424.213	76	27	490	3	427	48.2	5.73	1203.77	27	4	0	2.137	2.386	0.407	0.891	1.037	0.845	0.576883	0.692563	0.331002	0.905206	0.996877	0.956127	56.3	116.5	108.9	118.3	4.70772e+06	4.13758e+06	2.22972e+06	8.03218e+06	1.05022e+07	8.57084e+06	8.00717e+06	7.94462e+06	8.12171e+06	7.58754e+06	8.69961e+06	1.00653e+07	High	High	High	High	High	High
Master Protein	I1LWR4	Alpha-1,4 glucan phosphorylase OS=Glycine max OX=3847 GN=100800659 PE=3 SV=1	0	423.569	61	38	285	11	978	110	5.72	758.16	38	13	27	1.267	1.409	0.809	1.036	0.97	1.082	0.984855	0.96754	0.990068	0.967018	0.961182	0.860473	102.6	97	111.6	88.7	8.69281e+07	8.28601e+07	7.62363e+07	9.58143e+07	7.52941e+07	7.83646e+07	9.01533e+07	7.90101e+07	9.55809e+07	9.89307e+07	6.27774e+07	7.1657e+07	High	High	High	High	High	High
Master Protein	A0A0R0J4W7	Uncharacterized protein OS=Glycine max OX=3847 GN=100799082 PE=4 SV=1	0	423.026	79	26	449	1	426	48.1	5.74	1151.6	26	7	8	1.21	1.117	1.137	1.039	0.965	1.041	0.999364	0.965845	0.800158	0.954669	0.957982	0.934063	117.9	102	98.8	81.3	5.6447e+07	5.49635e+07	4.77929e+07	5.02602e+07	4.75378e+07	3.82286e+07	4.26804e+07	4.69438e+07	4.6075e+07	5.36058e+07	3.78866e+07	3.73797e+07	Not Found	Not Found	Not Found	Not Found	Not Found	Not Found
Master Protein	I1M4Y9	Bac_surface_Ag domain-containing protein OS=Glycine max OX=3847 GN=100794483 PE=4 SV=1	0	422.405	55	28	312	3	800	87.5	7.58	924.98	28	13	26	0.885	0.802	0.917	0.858	0.892	0.98	0.77091	0.760648	0.966709	0.681024	0.870729	0.982511	121.5	101.8	90.6	86.1	1.56872e+08	1.62343e+08	1.6159e+08	1.46968e+08	1.33507e+08	1.35334e+08	1.14147e+08	1.36839e+08	1.2047e+08	1.14541e+08	1.26654e+08	8.44419e+07	High	High	High	High	High	High
Master Protein	I1LJP3	PfkB domain-containing protein OS=Glycine max OX=3847 GN=100780082 PE=3 SV=1	0	422.3	86	20	701	7	331	35.4	5.11	2034.67	20	11	6	1.264	1.261	0.697	0.889	0.98	0.897	0.985619	0.997958	0.896836	0.837844	0.964586	0.982511	83	103.4	102.8	110.8	2.20594e+08	9.84242e+07	1.88705e+08	2.34927e+08	2.32524e+08	2.56074e+08	2.33511e+08	2.62017e+08	2.01184e+08	2.51848e+08	2.18043e+08	2.79629e+08	High	High	High	High	High	High
Master Protein	I1N9E6	Elongation factor Tu OS=Glycine max OX=3847 GN=GLYMA_19G153200 PE=3 SV=1	0	422.249	63	28	468	1	452	49.1	6.87	1335.49	28	19	0	1.545	2.051	0.66	0.876	1.318	0.753	0.878614	0.848906	0.883173	0.870303	0.815206	0.798687	62.8	111.2	97.1	128.9	4.84251e+06	2.66209e+06	3.33941e+06	4.03081e+06	5.90735e+06	6.00844e+06	5.26112e+06	4.85905e+06	5.15857e+06	6.11451e+06	6.84892e+06	7.91929e+06	High	High	High	High	Peak Found	High
Master Protein	A0A0R0J9B8	Uncharacterized protein OS=Glycine max OX=3847 GN=GLYMA_07G028000 PE=4 SV=1	0	421.86	48	42	343	3	1130	124.1	7.09	821.32	42	7	40	1.528	1.816	0.676	1.034	1.124	0.889	0.857616	0.819826	0.873933	0.967129	0.963895	0.982511	81.9	98.2	107.4	112.5	1.11499e+08	1.04512e+08	1.15563e+08	1.41471e+08	1.33696e+08	1.23619e+08	1.31836e+08	1.47285e+08	1.4624e+08	1.68417e+08	1.20806e+08	1.53239e+08	High	High	High	High	High	High
Master Protein	I1JNR3	Elongation factor Tu OS=Glycine max OX=3847 GN=GLYMA_03G150600 PE=3 SV=1	0	421.526	63	28	467	1	454	49.3	6.87	1346.34	28	3	28	1.07	1.128	0.914	0.98	1.11	0.872	0.94565	0.967593	0.969811	0.997086	0.966694	0.966172	95.3	97.7	99.3	107.7	2.91805e+08	2.56344e+08	2.49781e+08	2.44716e+08	3.03004e+08	2.62893e+08	2.36455e+08	2.76863e+08	2.6705e+08	2.5227e+08	2.8987e+08	3.00173e+08	High	High	High	High	High	High
Master Protein	I1KV23	Uncharacterized protein OS=Glycine max OX=3847 GN=100798588 PE=3 SV=1	0	420.598	39	45	285	8	1482	167.7	7.93	640.45	45	8	1	1.505	1.592	0.652	1.07	1.101	0.949	0.919646	0.931088	0.882806	0.938265	0.985677	0.997603	99.6	94.1	99.1	107.2	4.26748e+06	7.65526e+06	8.9522e+06	9.05719e+06	7.23526e+06	6.53669e+06	6.96615e+06	9.24884e+06	7.61971e+06	1.5536e+07	6.22143e+06	8.23757e+06	High	High	High	High	High	High
Master Protein	I1KPH6	6-phosphogluconate dehydrogenase, decarboxylating OS=Glycine max OX=3847 GN=100803740 PE=3 SV=1	0	420.28	75	30	520	5	495	53.7	6.57	1463.09	30	8	28	1.805	1.724	0.729	1.068	1.018	0.93	0.630421	0.863776	0.933813	0.914321	0.9898	0.997603	74.3	99.5	116.3	109.9	2.82103e+08	2.31064e+08	2.47709e+08	3.31387e+08	3.6025e+08	3.25866e+08	4.16596e+08	3.1833e+08	3.87347e+08	3.6631e+08	3.37903e+08	3.69972e+08	High	High	High	High	High	High
Master Protein	K7L0V1	Uncharacterized protein OS=Glycine max OX=3847 GN=100779987 PE=4 SV=1	0	419.627	50	46	230	46	1376	148	6.01	540.35	46	7	0	1.74	2.46	0.663	1.185	1.511	0.708	0.693019	0.534728	0.865888	0.359823	0.32951	0.580743	61	99	107.7	132.3	3.46473e+07	3.39011e+07	4.98426e+07	6.4282e+07	5.43928e+07	5.62435e+07	5.29736e+07	7.68965e+07	6.12153e+07	1.35738e+08	5.83021e+07	7.51545e+07	High	High	High	High	High	High
Master Protein	I1MVN5	Peroxidase OS=Glycine max OX=3847 GN=100819937 PE=3 SV=1	0	419.286	75	20	1097	5	325	35.5	9	2632.08	20	17	18	1.148	1.399	0.997	1.065	0.913	1.17	0.983748	0.962016	0.91204	0.921549	0.914019	0.706041	123.9	98.9	98.1	79.2	2.52419e+09	3.07237e+09	2.98891e+09	2.38535e+09	2.15582e+09	2.58347e+09	2.19517e+09	2.44932e+09	2.36619e+09	1.72003e+09	2.14081e+09	1.91002e+09	High	High	High	High	High	High
Master Protein	I1MRN6	Importin subunit alpha OS=Glycine max OX=3847 GN=100792804 PE=3 SV=1	0	418.622	78	27	367	8	530	58.5	5.14	1122.19	27	17	2	0.647	0.786	1.405	0.888	1.048	0.802	0.462103	0.812127	0.557254	0.894766	0.998476	0.902807	163.1	79	70	87.9	2.08586e+07	1.39628e+07	1.87218e+07	9.06613e+06	9.45969e+06	6.29874e+06	1.01326e+07	6.03221e+06	8.03288e+06	1.00947e+07	1.46371e+07	4.83419e+06	High	High	High	High	High	High
Master Protein	K7LM62	Pyruvate carboxyltransferase domain-containing protein OS=Glycine max OX=3847 GN=100788955 PE=3 SV=1	0	418.618	67	29	301	10	620	67.3	6.84	914.69	29	10	0	1.336	1.221	0.754	1.017	0.9	1.069	0.971445	0.9764	0.981862	0.987965	0.909017	0.927939	95.4	105.8	103.5	95.3	2.01768e+07	1.81712e+07	1.92162e+07	2.38241e+07	1.99655e+07	2.13139e+07	2.08591e+07	2.17569e+07	2.06928e+07	2.06705e+07	1.92066e+07	1.90833e+07	High	High	High	High	High	High
Master Protein	C6T7F3	PfkB domain-containing protein OS=Glycine max OX=3847 GN=100780391 PE=2 SV=1	0	417.81	70	15	409	4	341	37.5	5.47	1353.04	15	10	0	0.912	0.808	0.942	0.91	0.787	1.185	0.820021	0.801905	0.959343	0.92792	0.587057	0.699339	114	107.7	97.7	80.6	5.64033e+07	4.93027e+07	4.91042e+07	4.9408e+07	4.17982e+07	4.65983e+07	6.38145e+07	4.227e+07	3.88367e+07	3.71296e+07	3.48625e+07	2.71124e+07	High	High	High	High	High	High
Master Protein	A8C8H5	Glutamate decarboxylase OS=Glycine max OX=3847 GN=GAD PE=2 SV=1	0	416.489	67	28	431	2	503	57.2	5.82	1061.14	28	18	31	1.158	1.089	0.883	0.989	0.89	1.147	0.987113	0.956217	0.986228	0.997086	0.86892	0.761839	122.6	96.1	101.3	80	3.25897e+08	3.63542e+08	3.20753e+08	3.4806e+08	2.45541e+08	2.55414e+08	2.96735e+08	2.69113e+08	2.62141e+08	2.63168e+08	1.96182e+08	2.12607e+08	High	High	Peak Found	High	High	Peak Found
Master Protein	I1N6A6	UDP-glucose 6-dehydrogenase OS=Glycine max OX=3847 GN=100810907 PE=3 SV=1	0	416.23	73	24	458	2	480	53.1	6.7	1323.57	24	19	10	1.43	1.565	0.498	0.714	0.638	1.172	0.910011	0.929477	0.428893	0.021164	0.0875894	0.680819	68.3	118.9	113.6	99.2	6.17165e+07	5.10583e+07	4.92324e+07	8.89241e+07	7.90947e+07	8.99074e+07	9.9311e+07	5.25621e+07	8.49157e+07	7.42173e+07	7.11504e+07	8.81355e+07	High	High	High	High	High	High
Master Protein	K7LC06	HP domain-containing protein OS=Glycine max OX=3847 GN=100809968 PE=4 SV=1	0	416.059	51	38	417	13	963	107.6	6.27	1124.53	38	9	24	1.204	1.282	0.71	0.891	0.942	0.987	0.99894	0.990247	0.913278	0.843676	0.939996	0.982511	93.5	110.6	101.7	94.1	1.21615e+08	1.24271e+08	1.24243e+08	1.46873e+08	1.33915e+08	1.49736e+08	1.35105e+08	1.35276e+08	1.30757e+08	1.66447e+08	1.14024e+08	1.25043e+08	High	High	High	High	High	High
Master Protein	A0A0R4J5Q8	Uncharacterized protein OS=Glycine max OX=3847 GN=100776647 PE=3 SV=1	0	415.414	51	27	334	13	760	79.9	6.92	1169.6	27	17	15	1.044	0.922	0.831	0.86	0.751	1.161	0.92729	0.883703	0.998779	0.697214	0.420042	0.729736	109.1	113.4	104.4	73.1	2.3692e+08	1.92293e+08	2.07623e+08	2.20394e+08	1.85298e+08	2.15914e+08	2.00935e+08	1.59777e+08	1.9876e+08	1.1772e+08	1.39054e+08	1.63808e+08	High	High	High	High	High	High
Master Protein	O48548	Aspartate aminotransferase OS=Glycine max OX=3847 GN=AAT PE=2 SV=1	0	414.901	76	27	534	5	456	49.7	8.48	1394.89	27	6	0	0.834	0.697	1.217	1.063	1.001	1.22	0.6959	0.64026	0.708951	0.92792	0.983775	0.628841	120.2	88.7	105.3	85.8	5.35729e+07	3.41579e+07	4.87024e+07	3.34468e+07	4.49275e+07	3.59363e+07	4.00212e+07	6.27808e+07	4.26922e+07	2.43592e+07	4.39646e+07	3.47833e+07	High	High	High	High	High	High
Master Protein	I1LJE2	Coatomer subunit gamma OS=Glycine max OX=3847 GN=100791801 PE=3 SV=1	0	414.125	62	39	259	7	887	98.7	5.15	646.34	39	11	0	1.438	2.597	0.705	0.973	1.747	0.699	0.941598	0.740586	0.949014	0.996239	0.419073	0.711862	67.7	102.8	109.7	119.7	1.06469e+06	2.40414e+06	1.49445e+06	2.98611e+06	2.1145e+06	2.26995e+06	2.42244e+06	2.40764e+06	2.48539e+06	1.29362e+07	2.64299e+06	1.48273e+06	High	High	High	High	High	High
Master Protein	I1KCD7	Uncharacterized protein OS=Glycine max OX=3847 GN=100776762 PE=4 SV=2	0	412.387	31	28	506	1	814	90.9	5.24	1304.56	28	6	0																													Not Found	Not Found	Not Found	Not Found	Not Found	Not Found
Master Protein	A0A0R4J4C3	Elongation factor 1-alpha OS=Glycine max OX=3847 GN=100776330 PE=3 SV=1	0	412.371	65	23	1050	2	448	49.5	9.07	2735.56	23	10	0	0.456	1.112	0.988	0.45	1.152	0.446	0.440263	0.967983	0.964903	0.000407272	0.982141	0.118914	112.8	114.2	51.4	121.6	1.10314e+06	1.27524e+06	1.22382e+06	1.23903e+06	1.43116e+06	915660	329239	1.63344e+06	557616	1.81166e+06	960133		Peak Found	High	Peak Found	Peak Found	High	High
Master Protein	I1JJT8	Uncharacterized protein OS=Glycine max OX=3847 GN=100804647 PE=3 SV=1	0	412.171	77	20	474	4	407	41.6	6.57	1472.18	20	2	1	0.739	0.558	1.242	0.929	0.802	1.088	0.470624	0.350117	0.621658	0.956058	0.608716	0.871557	162.3	94.6	85.7	57.5	1.49198e+08	1.47793e+08	1.27958e+08	9.92028e+07	7.55306e+07	8.61012e+07	8.79832e+07	6.90164e+07	7.79924e+07	5.23396e+07	6.42414e+07	4.74917e+07	High	High	High	High	High	High
Master Protein	I1L6V4	Epimerase domain-containing protein OS=Glycine max OX=3847 GN=GLYMA_09G269600 PE=4 SV=1	0	411.906	86	27	401	5	327	35.9	5.74	1102.14	27	9	27	0.999	0.965	1.143	1.116	1.044	1.036	0.88911	0.90804	0.75063	0.745379	0.999952	0.939423	106	90	99.9	104.1	2.6874e+08	1.78989e+08	2.20443e+08	1.87328e+08	1.83057e+08	2.03905e+08	3.02503e+08	1.90396e+08	2.07765e+08	1.7327e+08	2.16576e+08	2.59989e+08	High	High	High	High	High	High
Master Protein	I1LBH6	Uncharacterized protein OS=Glycine max OX=3847 GN=100820325 PE=4 SV=1	0	411.885	70	23	511	23	459	50.5	5	1321.58	23	10	0	1.627	1.364	0.815	1.263	1.008	1.336	0.79001	0.968422	0.994553	0.144712	0.983775	0.30626	87.4	98.5	125.6	88.5	3.36661e+08	3.01245e+08	3.86164e+08	3.79071e+08	2.86933e+08	3.84259e+08	5.64599e+08	3.49492e+08	4.83726e+08	5.51917e+08	2.14649e+08	3.40636e+08	High	High	High	High	High	High
Master Protein	I1KKQ1	Uncharacterized protein OS=Glycine max OX=3847 GN=GLYMA_07G162900 PE=3 SV=1	0	411.854	68	31	330	31	522	58.7	8.53	936.53	31	7	0	1.252	1.188	1.065	1.191	1.257	0.983	0.991026	0.986894	0.848965	0.401265	0.821668	0.982511	101.7	81.7	123.9	92.6	1.01706e+08	1.06907e+08	1.48142e+08	1.21828e+08	8.59061e+07	8.01183e+07	1.31083e+08	1.30228e+08	1.17037e+08	2.38423e+08	7.66723e+07	9.73523e+07	High	High	High	High	High	High
Master Protein	I1J8T0	Isoflavone reductase OS=Glycine max OX=3847 GN=IFR1 PE=2 SV=1	0	411.135	84	26	714	10	318	35.6	5.47	1884.48	26	1	16	0.936	0.922	1.392	1.226	1.147	1.093	0.836934	0.883798	0.419111	0.260513	0.950455	0.862898	114	82.2	108.5	95.3	7.35789e+08	5.03706e+08	5.85019e+08	4.11494e+08	4.21562e+08	4.26829e+08	5.56938e+08	4.843e+08	5.78833e+08	5.37797e+08	4.58154e+08	4.8911e+08	High	High	High	High	High	High
Master Protein	A0A0R4J574	Serine hydroxymethyltransferase OS=Glycine max OX=3847 GN=100812952 PE=3 SV=1	0	410.512	77	27	461	8	507	56.1	8.27	1462.3	27	14	22	1.323	1.436	0.758	0.984	1.082	0.912	0.963671	0.949133	0.959168	0.999892	0.985677	0.984782	91	100.9	98.6	109.5	1.93844e+08	1.73852e+08	1.76839e+08	1.88143e+08	2.25692e+08	1.96124e+08	1.78598e+08	1.91507e+08	2.16949e+08	1.67328e+08	2.15878e+08	2.12652e+08	High	High	High	High	High	High
Master Protein	C6TE07	AAA domain-containing protein OS=Glycine max OX=3847 GN=100812783 PE=2 SV=1	0	410.376	60	27	446	2	418	47.1	8.76	1360.47	27	7	26	0.762	0.784	1.309	0.983	1.048	0.958	0.528732	0.731715	0.520367	0.999252	0.999952	0.992048	133.4	89.7	93.9	83	2.23244e+08	2.20985e+08	2.20864e+08	1.61775e+08	1.48517e+08	1.35688e+08	1.57269e+08	1.53424e+08	1.55592e+08	1.37479e+08	1.48391e+08	1.14551e+08	High	High	High	High	High	High
Master Protein	I1LZI3	Lysine--tRNA ligase OS=Glycine max OX=3847 GN=100785660 PE=3 SV=1	0	409.746	66	33	433	4	599	68.5	6.29	1074.81	33	13; 11	34	1.474	1.483	0.76	1.052	1.123	0.899	0.88159	0.938515	0.960413	0.942382	0.963895	0.982511	93.6	98.7	94.7	113	1.90644e+08	1.55641e+08	1.76743e+08	1.51209e+08	2.15432e+08	1.86363e+08	1.78717e+08	1.75745e+08	2.3219e+08	1.51105e+08	2.13333e+08	2.35637e+08	High	High	High	High	High	High
Master Protein	I1J8Y0	Uncharacterized protein OS=Glycine max OX=3847 GN=GLYMA_01G177700 PE=3 SV=1	0	409.317	65	30	430	13	657	73	5.73	1275.25	30	1	1	1.242	1.571	0.843	1.02	1.036	0.88	0.993208	0.928481	0.998779	0.981606	0.996877	0.982511	99.8	97.6	99.6	103	6.26071e+07	6.9562e+07	6.44456e+07	7.29264e+07	6.30788e+07	6.10195e+07	5.55128e+07	7.0247e+07	6.43753e+07	7.27197e+07	6.65131e+07	5.12068e+07	High	High	High	High	High	High
Master Protein	A0A0R0ILS3	Uncharacterized protein OS=Glycine max OX=3847 GN=GLYMA_08G031800 PE=3 SV=2	0	409.192	68	19	476	7	509	54.8	5.77	1597.8	19		13	1.424	1.555	0.758	0.998	1.029	0.954	0.913352	0.920767	0.959153	0.996239	0.996877	0.995456	91	98.1	100.2	110.7	1.70504e+08	1.93633e+08	1.805e+08	1.8675e+08	2.04828e+08	1.94636e+08	2.92762e+08	1.98749e+08	1.85754e+08	2.19593e+08	2.6413e+08	2.01619e+08	High	High	High	High	High	High
Master Protein	I1N6A5	Alpha-1,4 glucan phosphorylase OS=Glycine max OX=3847 GN=100806646 PE=3 SV=1	0	407.85	59	37	297	10	981	110.3	5.47	765.14	37	19	0	2.165	2.489	0.539	1.085	1.021	0.972	0.567334	0.654027	0.645784	0.927254	0.984995	0.982511	53.6	108.1	127.3	111	5.64502e+06	4.6942e+06	6.4453e+06	1.13722e+07	6.96054e+06	1.24842e+07	1.33982e+07	7.064e+06	1.4214e+07	1.16783e+07	1.03078e+07	1.77884e+07	High	High	High	High	High	High
Master Protein	I1KQG0	T-complex protein 1 subunit delta OS=Glycine max OX=3847 GN=GLYMA_08G050100 PE=3 SV=1	0	407.836	76	29	400	6	533	57.6	7.28	1173.13	29	8	25	1.007	1.438	0.97	1.003	1.195	0.823	0.897329	0.949133	0.933813	0.99582	0.915525	0.901091	110.2	94.8	90.7	104.3	1.592e+08	1.51048e+08	1.31948e+08	1.29943e+08	1.38161e+08	1.07955e+08	1.16052e+08	1.38972e+08	1.24251e+08	2.07396e+08	1.27415e+08	1.4296e+08	High	High	High	High	High	High
Master Protein	I1KC56	Uncharacterized protein OS=Glycine max OX=3847 GN=100781379 PE=3 SV=1	0	407.771	85	28	365	11	487	53.3	6.8	1128.05	28	6	19	1.044	0.888	0.917	0.896	0.913	0.967	0.92729	0.85825	0.966709	0.863705	0.913976	0.984469	103.4	101.8	100.8	94	1.73115e+08	1.74363e+08	1.72354e+08	1.64929e+08	1.88414e+08	1.70534e+08	1.6891e+08	1.68965e+08	1.47062e+08	1.42388e+08	1.57413e+08	1.69537e+08	High	High	High	High	High	High
Master Protein	I1KGH6	Uncharacterized protein OS=Glycine max OX=3847 GN=100810990 PE=3 SV=1	0	407.323	71	22	388	11	505	54.4	6.27	1179.52	22	7	14	1.345	1.462	0.816	0.956	1.065	0.951	0.952194	0.943279	0.994839	0.989478	0.996877	0.997595	88	103.2	92.8	116	1.63238e+08	1.43021e+08	1.53373e+08	1.69637e+08	1.79974e+08	1.89896e+08	2.42187e+08	1.6061e+08	1.61852e+08	2.02157e+08	1.79179e+08	2.18503e+08	High	High	High	High	High	High
Master Protein	I1L1K7	Uncharacterized protein OS=Glycine max OX=3847 GN=100788218 PE=3 SV=1	0	407.22	85	31	714	1	413	46.8	5.68	1747.63	31	9	1	0.851	1.049	1.066	0.959	1.083	0.939	0.774871	0.934549	0.820258	0.994897	0.983775	0.999972	115.7	98	91.5	94.8	3.41549e+07	2.56845e+07	2.6049e+07	2.42834e+07	2.20681e+07	1.87629e+07	2.19838e+07	2.06032e+07	1.82153e+07	2.13438e+07	2.06806e+07	2.36638e+07	High	High	High	High	High	High
Master Protein	I1N6I4	6-phosphogluconate dehydrogenase, decarboxylating OS=Glycine max OX=3847 GN=100799034 PE=3 SV=1	0	407.111	57	23	471	8	499	55.3	7.75	1298.69	23	19	0	1.295	0.973	0.692	0.96	0.77	1.386	0.975481	0.902675	0.913278	0.99582	0.522783	0.329873	129.8	102.8	100.7	66.8	3.5751e+07	3.3939e+07	2.69527e+07	3.20166e+07	2.68776e+07	2.58982e+07	2.63388e+07	2.35734e+07	3.0926e+07	1.92576e+07	1.74603e+07	1.73288e+07	High	High	High	High	High	High
Master Protein	A0A0R0G6T3	Uncharacterized protein OS=Glycine max OX=3847 GN=GLYMA_15G038100 PE=3 SV=1	0	406.336	92	21	1073	6	253	27.2	6.23	2858.5	21	15	15	1.756	1.093	0.742	1.068	0.815	1.242	0.675725	0.959797	0.947228	0.914496	0.65552	0.528931	88.7	101.6	120.1	89.6	1.03757e+09	9.43504e+08	9.6709e+08	1.10778e+09	1.0777e+09	1.18924e+09	1.67484e+09	9.4071e+08	1.31014e+09	1.03216e+09	9.16403e+08	9.76814e+08	High	High	High	High	High	High
Master Protein	A0A0R4J5A7	Uncharacterized protein OS=Glycine max OX=3847 GN=100786735 PE=3 SV=1	0	406.284	86	32	710	3	413	46.9	5.68	1753.59	32	15	33	1.244	1.745	0.758	0.977	1.189	0.869	0.992687	0.856123	0.958836	0.996239	0.91688	0.964292	96.8	97.8	95.3	110.1	7.39855e+08	5.12025e+08	5.56828e+08	6.0719e+08	5.62707e+08	4.88846e+08	5.48339e+08	5.85513e+08	5.20104e+08	7.50926e+08	5.30305e+08	6.33106e+08	High	High	High	High	High	High
Master Protein	I1LFG6	Uncharacterized protein OS=Glycine max OX=3847 GN=GLYMA_10G293800 PE=3 SV=1	0	406.157	73	27	415	6	636	67.6	7.5	1240.78	27	10	0	1.902	1.589	0.651	1.028	0.958	1.098	0.591388	0.942471	0.854239	0.981606	0.957982	0.85664	101.5	104.3	101.9	92.3	2.82919e+07	3.06618e+07	3.63728e+07	3.15053e+07	2.60612e+07	3.32805e+07	3.19677e+07	3.07678e+07	2.9771e+07	3.00674e+07	2.7875e+07	2.722e+07	High	High	High	High	High	High
Master Protein	I1JUS6	Aspartate aminotransferase OS=Glycine max OX=3847 GN=GLYMA_04G080700 PE=4 SV=1	0	406.11	88	28	444	6	416	45.3	7.94	1271.64	28	4	23	1.327	1.239	0.846	1.049	1.077	0.95	0.96286	0.999972	0.998779	0.946171	0.989009	0.997603	95.8	92.2	102.4	109.6	3.02539e+08	2.9906e+08	2.70501e+08	3.0224e+08	2.87953e+08	2.71626e+08	3.19605e+08	4.30026e+08	2.73824e+08	3.71483e+08	2.99849e+08	3.42361e+08	High	High	High	High	High	High
Master Protein	I1LSZ2	Ubiquitin carboxyl-terminal hydrolase OS=Glycine max OX=3847 GN=100805602 PE=3 SV=2	0	405.266	60	33	348	18	807	89.8	5.22	978.66	33	12	15	1.924	2.317	0.615	0.963	1.058	0.933	0.522337	0.56667	0.747963	0.994937	0.998905	0.997906	88.2	98	109.8	104	8.83643e+07	8.42119e+07	9.08135e+07	9.52692e+07	1.00472e+08	9.81495e+07	1.0995e+08	1.12591e+08	9.10426e+07	1.04149e+08	1.14354e+08	9.35627e+07	High	High	High	High	High	High
Master Protein	I1NBT0	Importin subunit alpha OS=Glycine max OX=3847 GN=100806288 PE=3 SV=1	0	404.963	64	27	351	5	532	58.8	5.27	1165.28	27	19	0	0.642	1.006	1.374	0.979	0.927	1.393	0.469812	0.932885	0.64729	0.996259	0.940904	0.257713	170.8	71.7	75.2	82.3	1.16089e+07	1.56341e+07	1.4735e+07	6.18073e+06	7.38203e+06	4.55895e+06	5.8518e+06	6.48773e+06	6.65373e+06	7.63855e+06	7.10001e+06	2.77114e+06	High	High	High	High	High	High
Master Protein	A0A0R0HR30	Pyr_redox_2 domain-containing protein OS=Glycine max OX=3847 GN=100500084 PE=4 SV=1	0	404.825	73	23	1071	5	433	47	5.62	2307.79	23	11	19	1.512	1.992	0.728	0.993	1.28	0.763	0.867025	0.718403	0.933813	0.996239	0.784615	0.747843	88.3	100.2	90.9	120.5	7.1345e+08	7.04293e+08	7.96929e+08	8.23131e+08	7.97533e+08	8.09225e+08	7.34452e+08	9.54861e+08	7.09073e+08	1.33358e+09	8.60413e+08	9.734e+08	High	High	High	High	High	High
Master Protein	A0A0R0JBY6	Uncharacterized protein OS=Glycine max OX=3847 GN=100777319 PE=4 SV=1	0	404.769	67	34	361	7	724	78.9	9	1015.49	34	7	27	1.312	1.638	0.753	0.892	1.251	0.74	0.96739	0.892873	0.955415	0.851359	0.834913	0.662846	82	97	101.7	119.2	8.32171e+07	9.48354e+07	8.3795e+07	9.91622e+07	1.08748e+08	9.56236e+07	1.03922e+08	1.12508e+08	8.92148e+07	1.24216e+08	1.1853e+08	1.21829e+08	High	High	High	High	High	High
Master Protein	I1M8P0	Polyadenylate-binding protein OS=Glycine max OX=3847 GN=100784442 PE=3 SV=1	0	403.221	60	28	332	9	652	71.7	7.78	1024.27	28	14	1	1.038	1.006	0.981	0.955	1.061	0.917	0.923052	0.929961	0.932794	0.989478	0.999952	0.994018	88.6	97.4	97	117.1	5.51778e+07	5.05495e+07	4.84242e+07	5.50696e+07	6.2169e+07	5.55768e+07	6.09174e+07	5.27336e+07	5.53501e+07	4.02451e+07	6.68634e+07	7.19681e+07	High	High	High	High	High	High
Master Protein	I1JXY2	Gal_mutarotas_2 domain-containing protein OS=Glycine max OX=3847 GN=100817168 PE=3 SV=1	0	401.947	53	36	353	36	914	103.9	6.4	973.2	36	4	0	1.502	1.761	0.611	0.867	0.891	0.878	0.869911	0.863711	0.737118	0.73431	0.869635	0.97601	100.3	111.4	93.8	94.5	9.23674e+07	9.65239e+07	9.02289e+07	1.04387e+08	9.95798e+07	1.02517e+08	9.02549e+07	8.63112e+07	8.45538e+07	9.0792e+07	8.70403e+07	7.70865e+07	High	High	High	High	High	High
Master Protein	A7BIC9	Malonyl-CoA:isoflavone 7-O-glucoside-6''-O-malonyltransferase OS=Glycine max OX=3847 GN=GmIF7MaT PE=2 SV=1	0	401.443	76	29	351	21	467	51.6	6.42	1099.13	29	13	8	1.245	1.876	0.844	1.036	1.062	1.019	0.992687	0.786781	0.999879	0.967018	0.996877	0.957397	101.7	98.4	101.7	98.1	1.48148e+08	1.52869e+08	1.36368e+08	1.52195e+08	1.43467e+08	1.39394e+08	1.68821e+08	1.48268e+08	1.39761e+08	1.58663e+08	1.3823e+08	1.43025e+08	High	High	High	High	High	High
Master Protein	A0A0R0EW30	AAA domain-containing protein OS=Glycine max OX=3847 GN=100783650 PE=3 SV=1	0	401.275	80	24	349	3	422	47.3	5.6	1003.88	24	18	0	1.064	1.132	0.984	1.038	1.054	0.971	0.956443	0.966408	0.940583	0.967129	0.999952	0.98259	110.3	95.6	95.1	99	1.63548e+07	1.495e+07	1.57289e+07	1.3624e+07	1.57922e+07	1.31467e+07	1.31222e+07	1.35562e+07	1.51128e+07	1.38046e+07	1.43185e+07	1.41061e+07	High	High	High	High	High	High
Master Protein	I1KH24	Phospholipase D OS=Glycine max OX=3847 GN=100794849 PE=3 SV=1	0	401.248	55	36	371	6	809	91.5	5.78	969.69	36	7	0	2.329	3.639	0.842	1.166	1.676	0.652	0.476663	0.396191	0.996737	0.729152	0.330474	0.477259	79.3	102.3	122.4	96.1	4.22531e+06	3.08549e+06	6.47585e+06	5.45105e+06	5.51161e+06	2.30418e+06	4.30584e+06	8.69189e+06	6.52485e+06	1.343e+07	2.06013e+06	5.12169e+06	Peak Found	High	High	High	High	High
Master Protein	I1L8R1	Ribos_L4_asso_C domain-containing protein OS=Glycine max OX=3847 GN=100786828 PE=4 SV=1	0	401.181	59	22	533	7	405	44.7	10.45	1453.46	22	10	1	1.529	1.405	0.577	0.828	1.019	0.778	0.857178	0.967593	0.645784	0.494213	0.991287	0.807125	88.4	111.7	102.1	97.8	8.36261e+07	9.66152e+07	7.73418e+07	8.84046e+07	1.12375e+08	1.05723e+08	1.02313e+08	9.65776e+07	8.28584e+07	6.38601e+07	1.05239e+08	9.25864e+07	High	High	High	High	High	High
Master Protein	A0A0R4J3Y6	AAA domain-containing protein OS=Glycine max OX=3847 GN=GLYMA_08G224500 PE=3 SV=1	0	400.887	57	26	440	1	418	47.1	8.6	1333.44	26	8	0	0.874	1.178	1.142	0.974	1.322	0.728	0.838696	0.975279	0.84983	0.996239	0.782913	0.676928	104.4	89.6	91.6	114.4	1.49492e+07	1.06408e+07	1.08264e+07	9.2839e+06	1.14942e+07	8.88982e+06	9.49204e+06	9.13868e+06	1.05996e+07	1.18583e+07	9.39603e+06	1.31358e+07	High	High	High	High	High	High
Master Protein	I1M669	Uncharacterized protein OS=Glycine max OX=3847 GN=100776777 PE=3 SV=1	0	400.406	89	21	470	6	381	38.9	6.25	1448.49	21	14	17	0.751	0.488	1.378	0.975	0.678	1.506	0.498769	0.192637	0.433603	0.996239	0.17368	0.080306	144.5	102.6	86.8	66.1	4.02465e+08	3.84971e+08	3.3739e+08	2.77322e+08	2.73255e+08	2.48542e+08	3.30449e+08	2.23461e+08	2.31156e+08	1.76008e+08	1.80081e+08	1.63262e+08	High	High	High	High	High	High
Master Protein	I1LGM2	Uncharacterized protein OS=Glycine max OX=3847 GN=100816776 PE=4 SV=1	0	399.664	61	33	439	12	585	65.5	6.67	973.25	33	11	25	1.662	1.495	0.702	0.992	1.15	0.812	0.761764	0.93592	0.907136	0.997081	0.948925	0.879257	89.3	100.9	91.9	117.8	2.2616e+08	2.41548e+08	2.34052e+08	1.97578e+08	2.7869e+08	2.64466e+08	2.19267e+08	2.40829e+08	2.97696e+08	1.38691e+08	3.08585e+08	3.58534e+08	High	High	High	High	High	High
Master Protein	K7LMT6	Uncharacterized protein OS=Glycine max OX=3847 GN=100814320 PE=4 SV=1	0	399.275	35	43	256	25	2135	228.4	5.77	660.08	43	11	18	1.297	1.347	0.732	0.934	0.957	0.94	0.973215	0.983851	0.941177	0.967018	0.950758	0.997906	91.8	110.5	102.9	94.9	4.48296e+07	4.43172e+07	4.16307e+07	4.15912e+07	5.33513e+07	5.6208e+07	4.23227e+07	5.02957e+07	4.96922e+07	3.62706e+07	4.95902e+07	4.58195e+07	High	High	High	High	High	High
Master Protein	I1J6K4	Uncharacterized protein OS=Glycine max OX=3847 GN=100808526 PE=3 SV=2	0	398.629	53	29	337	12	928	102.9	6.7	1065.4	29	1	17	1.101	0.946	0.992	1.069	0.923	1.147	0.962952	0.893416	0.913278	0.911844	0.917056	0.763042	92.2	93.4	108.4	106.1	1.10652e+08	1.09284e+08	1.1095e+08	1.12115e+08	1.12067e+08	1.16327e+08	1.60095e+08	1.3013e+08	1.19445e+08	1.20948e+08	1.63516e+08	1.27356e+08	High	High	High	High	High	High
Master Protein	I1JET9	Nitrite and sulphite reductase OS=Glycine max OX=3847 GN=732631 PE=2 SV=1	0	398.544	62	31	588	7	605	67.6	6.93	1366.83	31	2	0	2.369	3.016	0.53	1.05	1.438	0.67	0.352259	0.505225	0.639752	0.954328	0.458082	0.436517	44.8	94.3	115.3	145.6	9.63611e+06	5.91534e+06	1.09389e+07	1.71146e+07	2.027e+07	2.575e+07	1.18524e+07	2.55852e+07	2.47802e+07	3.76398e+07	2.79083e+07	3.13003e+07	High	High	High	High	High	High
Master Protein	I1NEH3	Uncharacterized protein OS=Glycine max OX=3847 GN=100807194 PE=3 SV=1	0	398.459	60	20	394	3	461	48.4	7.58	1290.39	20	20	0	0.987	1.518	0.946	0.923	1.278	0.695	0.917628	0.962016	0.963034	0.962826	0.866429	0.528069	96.8	106.9	90.1	106.1	1.06721e+07	1.01232e+07	1.05946e+07	1.0763e+07	1.16974e+07	1.20426e+07	9.86071e+06	1.13372e+07	9.43853e+06	1.03482e+07	1.1606e+07	1.3298e+07	High	High	High	High	High	High
Master Protein	A0A0R4J3Y5	Uncharacterized protein OS=Glycine max OX=3847 GN=100817948 PE=3 SV=1	0	397.401	83	27	647	1	413	46.6	5.57	1612.76	27	8	0	0.617	0.731	1.414	0.777	0.921	0.843	0.569089	0.856123	0.618703	0.513043	0.951457	0.964684	127.3	101.1	78.5	93.1	5.88878e+06	4.17929e+06	4.56708e+06	3.62547e+06	3.70354e+06	2.95657e+06	2.81477e+06		2.81663e+06	303673	3.33928e+06	4.71051e+06	High	Peak Found	Peak Found	Peak Found	Peak Found	Peak Found
Master Protein	I1M6E1	HATPase_c domain-containing protein OS=Glycine max OX=3847 GN=100807416 PE=3 SV=1	0	397.367	63	37	371	1	700	80.1	5.07	892	37	14	33	4.357	3.847	0.488	1.946	1.804	1.03	0.000572523	0.0714161	0.376421	6.25827e-10	0.0462124	0.947814	48.8	62.1	145	144.1	6.62884e+07	5.6951e+07	1.23301e+08	7.66908e+07	8.44215e+07	2.27884e+08	1.3477e+08	1.96961e+08	3.99093e+08	1.27349e+08	1.95846e+08	2.94463e+08	Not Found	Not Found	Not Found	Not Found	Not Found	Not Found
Master Protein	A0A0R4J3M1	Uncharacterized protein OS=Glycine max OX=3847 GN=100809918 PE=3 SV=1	0	396.994	83	27	656	1	413	46.6	5.57	1633.01	27	7	12	1.188	1.654	0.767	0.916	1.17	0.769	0.99762	0.90804	0.968877	0.938915	0.945154	0.775153	107.3	101.3	93	98.5	5.99094e+07	4.11277e+07	4.51263e+07	4.25979e+07	4.70351e+07	3.69327e+07	3.91292e+07	3.92664e+07	3.86395e+07	4.78144e+07	4.02106e+07	4.14306e+07	High	High	High	Peak Found	High	High
Master Protein	I1MX58	AA_TRNA_LIGASE_II domain-containing protein OS=Glycine max OX=3847 GN=100811577 PE=3 SV=1	0	396.216	77	35	460	10	544	60.2	6.4	1143.1	35	17	26	1.041	1.202	0.936	1	1.178	0.858	0.926286	0.989834	0.954779	0.996018	0.924268	0.950919	96.2	102.3	95.8	105.7	2.55782e+08	2.17285e+08	2.05344e+08	2.30983e+08	2.39454e+08	2.12152e+08	2.15378e+08	2.33744e+08	2.16391e+08	2.38637e+08	2.27915e+08	2.70637e+08	High	High	High	High	High	High
Master Protein	I1LZ03	Ribos_L4_asso_C domain-containing protein OS=Glycine max OX=3847 GN=100779764 PE=4 SV=1	0	396.052	58	22	537	8	405	44.6	10.48	1437.43	22	13	19	1.704	2.028	0.536	0.863	1.047	0.829	0.722155	0.698476	0.514982	0.716401	0.999952	0.917444	75.8	112.9	97.7	113.6	3.55667e+08	4.25065e+08	3.13012e+08	4.4228e+08	5.51627e+08	5.29688e+08	5.21639e+08	4.58396e+08	4.41582e+08	3.29066e+08	5.32745e+08	5.89797e+08	High	High	High	High	High	High
Master Protein	P27066	Ribulose bisphosphate carboxylase large chain OS=Glycine max OX=3847 GN=rbcL PE=1 SV=3	0	395.88	53	26	645	26	475	52.6	6.43	1509.39	26		0	2.234	2.445	0.545	1.343	1.598	0.769	0.276847	0.464101	0.54769	0.0298552	0.196104	0.766818	67.3	98.1	100	134.5	2.8328e+08	2.27296e+08	2.49742e+08	3.64076e+08	2.15596e+08	3.72731e+08	3.71039e+08	4.81792e+08	3.61447e+08	6.01142e+08	4.99079e+08	4.7177e+08	High	High	High	High	High	High
Master Protein	I1JMI9	Malic enzyme OS=Glycine max OX=3847 GN=100799344 PE=3 SV=1	0	395.706	63	27	322	27	622	68.9	6.02	911.1	27	3	0	1.151	1.25	0.99	1.079	1.084	0.947	0.984745	0.999972	0.913278	0.870584	0.985677	0.992341	95	91.8	108.1	105	8.65926e+07	5.7256e+07	6.74499e+07	6.51781e+07	7.57381e+07	6.26177e+07	8.57201e+07	7.14728e+07	7.67236e+07	8.01001e+07	7.02818e+07	7.4505e+07	High	High	High	High	High	High
Master Protein	I1L3P6	T-complex protein 1 subunit gamma OS=Glycine max OX=3847 GN=100813370 PE=3 SV=1	0	395.656	69	36	384	8	554	60.2	6.27	858.37	36	9	30	1.328	1.753	0.702	0.945	1.235	0.788	0.962363	0.850889	0.907286	0.978728	0.865627	0.816056	104.9	98.2	88	108.8	2.31184e+08	2.13796e+08	1.80084e+08	2.00153e+08	2.47136e+08	1.52336e+08	1.79383e+08	1.69624e+08	1.98444e+08	2.07249e+08	2.21774e+08	2.53785e+08	High	High	High	High	High	High
Master Protein	I1MJD7	Inosine-5'-monophosphate dehydrogenase OS=Glycine max OX=3847 GN=GLYMA_15G263100 PE=3 SV=1	0	394.849	66	21	260	8	502	53.3	6.11	861.65	21	15	14	1.655	2.554	0.671	1.028	1.4	0.71	0.76698	0.407473	0.865468	0.976434	0.53098	0.536283	66.3	71.6	105.4	156.7	6.56661e+07	6.50714e+07	7.05349e+07	6.76609e+07	7.10011e+07	8.53841e+07	1.04457e+08	1.10704e+08	6.32079e+07	2.25975e+08	1.5534e+08	1.23343e+08	High	High	High	High	High	High
Master Protein	K7MBR4	HP domain-containing protein OS=Glycine max OX=3847 GN=100808499 PE=4 SV=1	0	394.361	50	37	449	12	963	107.7	6.32	1189.3	37	15	0	1.173	1.556	0.772	0.915	0.964	0.952	0.992687	0.931848	0.97117	0.945081	0.957982	0.997603	102.2	108.9	97.9	91	3.97364e+07	4.03906e+07	3.59174e+07	4.59997e+07	4.2317e+07	4.19049e+07	2.84168e+07	4.0729e+07	3.80475e+07	4.81667e+07	3.53767e+07	2.77935e+07	High	High	High	High	High	High
Master Protein	I1MXM6	Polyadenylate-binding protein OS=Glycine max OX=3847 GN=100811385 PE=3 SV=1	0	394.23	56	28	325	9	654	71.9	7.15	1120.15	28	17	14	1.118	1.196	0.854	0.944	1.074	0.86	0.971516	0.989278	0.998222	0.97824	0.991287	0.952016	86.3	93.9	94.5	125.4	1.57464e+08	1.45715e+08	1.42714e+08	1.47917e+08	1.65708e+08	1.58575e+08	1.92748e+08	1.50162e+08	1.59614e+08	2.15173e+08	2.1173e+08	1.86213e+08	High	High	High	High	High	High
Master Protein	I1K5G1	T-complex protein 1 subunit delta OS=Glycine max OX=3847 GN=100786888 PE=3 SV=1	0	393.286	76	29	398	6	533	57.5	7.28	1135.3	29	5	0	0.835	0.849	1.302	1.061	1.491	0.679	0.778572	0.837217	0.628286	0.942382	0.426606	0.519965	114.4	86.7	85	113.9	3.27838e+07	2.02376e+07	1.80035e+07	1.98224e+07	1.53454e+07	1.30065e+07	1.18611e+07	1.74179e+07	1.50362e+07	2.26069e+07	2.01549e+07	1.03462e+07	High	High	High	High	High	High
Master Protein	I1JAV9	Pectinesterase OS=Glycine max OX=3847 GN=100815836 PE=3 SV=1	0	392.515	49	21	534	19	553	61	8.59	1370.34	21	1	1	1.184	1.372	0.89	1.036	1.098	0.935	0.997285	0.966873	0.986228	0.967018	0.977908	0.997906	98.9	94.8	106.4	99.9	3.88783e+08	3.95429e+08	4.45181e+08	3.78966e+08	3.64606e+08	4.41086e+08	4.9e+08	4.25093e+08	3.96548e+08	5.1824e+08	3.9928e+08	3.31005e+08	High	High	High	High	High	High
Master Protein	I1MQT0	Uncharacterized protein OS=Glycine max OX=3847 GN=100820294 PE=3 SV=1	0	391.485	52	40	411	9	914	99.6	9.1	1109.67	40	17	18	0.925	0.889	0.88	0.871	0.803	1.102	0.834903	0.874291	0.986228	0.748668	0.613519	0.848493	108.1	111.6	94	86.3	5.56903e+07	5.7809e+07	5.11936e+07	5.74595e+07	6.05171e+07	5.53886e+07	5.70825e+07	4.44913e+07	4.84037e+07	3.96594e+07	4.44587e+07	4.94554e+07	High	High	High	High	High	High
Master Protein	I1JR71	Importin subunit alpha OS=Glycine max OX=3847 GN=100798125 PE=3 SV=1	0	391.229	72	28	311	9	532	58.8	5.38	1038.23	28	3	7	0.939	1.123	1.091	1.018	1.28	0.798	0.865384	0.95506	0.800353	0.989478	0.802013	0.847982	94.8	81.7	92.7	130.9	3.12265e+07	2.72083e+07	2.82437e+07	2.43367e+07	2.75681e+07	2.35114e+07	2.63373e+07	2.76184e+07	2.82117e+07	2.55101e+07	4.80953e+07	3.90212e+07	High	High	High	High	High	High
Master Protein	I1MDC4	Bac_surface_Ag domain-containing protein OS=Glycine max OX=3847 GN=100776079 PE=4 SV=2	0	390.908	56	28	318	3	794	86.8	7.42	933.99	28	15	0	1.476	1.184	0.869	0.8	0.873	0.898	0.909997	0.993489	0.998779	0.599642	0.905353	0.985117	84.4	105.9	102.8	107	4.1427e+06	3.55696e+06	3.66755e+06	4.60273e+06	4.53913e+06	5.45337e+06	4.61348e+06	4.46842e+06	2.78338e+06	4.65035e+06	5.10529e+06	2.01063e+06	High	High	High	High	High	High
Master Protein	A0A0R0I177	Pyr_redox_2 domain-containing protein OS=Glycine max OX=3847 GN=GLYMA_10G067500 PE=4 SV=1	0	390.511	73	22	1064	4	433	46.8	5.91	2327	22	10	0	1.263	2.006	0.771	0.972	1.378	0.696	0.990286	0.775041	0.970771	0.996239	0.656943	0.490063	96.8	95.6	99.4	108.1	3.10647e+07	4.09044e+07	4.64901e+07	4.99766e+07	4.03811e+07	4.02354e+07	3.55451e+07	4.84008e+07	4.19982e+07	1.00393e+08	4.56601e+07	3.96489e+07	High	High	High	High	High	High
Master Protein	K7MSG8	Uncharacterized protein OS=Glycine max OX=3847 GN=100777553 PE=3 SV=1	0	390.026	66	21	476	1	424	46.8	6.93	1312.58	21	18	0	0.797	0.899	1.102	0.986	1.006	0.949	0.835678	0.923493	0.911289	0.997495	0.983775	0.997603	132.2	84.9	83.7	99.2	3995780	2.26085e+06	3.86085e+06	2.47993e+06	2.28623e+06	3.62469e+06	2.44454e+06	2.37055e+06	3.18376e+06		3.53096e+06	2.37475e+06	Peak Found	Peak Found	Peak Found	Peak Found	High	High
Master Protein	Q42797	Trans-cinnamate 4-monooxygenase OS=Glycine max OX=3847 GN=CYP73A11 PE=2 SV=1	0	389.631	67	31	416	7	506	58	8.98	1107.82	31	2	24	1.461	1.856	0.625	0.941	1.191	0.763	0.889133	0.797574	0.770806	0.970697	0.91688	0.746923	86.7	103.7	104.6	105.1	9.17966e+07	1.07292e+08	1.13301e+08	1.50751e+08	1.28332e+08	1.25353e+08	9.1005e+07	1.41238e+08	1.29408e+08	1.80164e+08	1.30019e+08	1.24425e+08	High	High	High	High	High	High
Master Protein	I1LG10	Uncharacterized protein OS=Glycine max OX=3847 GN=GLYMA_11G011500 PE=3 SV=1	0	389.341	58	19	575	1	389	42.9	6.34	1446.9	19	11	4	2.179	1.814	0.362	1.021	0.784	1.192	0.381246	0.889774	0.069826	0.981606	0.572049	0.692142	69.5	123	125.1	82.4	2.52115e+07	2.29655e+07	1.78622e+07	2.65689e+07	4.06419e+07	4.70965e+07	6.22121e+07	1.84783e+07	4.13138e+07	8.46937e+06	2.72243e+07	4.18196e+07	High	High	High	High	High	High
Master Protein	Q2PMV0	ATP synthase subunit beta, chloroplastic OS=Glycine max OX=3847 GN=atpB PE=3 SV=1	0	386.315	80	27	370	26	498	53.7	5.4	949.21	27		0	1.907	2.1	0.693	1.222	1.573	0.765	0.535636	0.6861	0.891815	0.272096	0.228846	0.751605	79.2	89.5	105.5	125.7	9.52941e+07	7.08845e+07	9.24659e+07	1.04469e+08	8.2237e+07	1.06984e+08	7.59654e+07	1.53157e+08	1.23195e+08	9.18304e+07	1.68123e+08	1.46781e+08	High	High	High	High	High	High
Master Protein	A0A368UIA0	MGS domain-containing protein OS=Glycine max OX=3847 GN=GLYMA_04G133100 PE=3 SV=1	0	386.278	66	31	496	9	605	65.4	6.68	1109.56	31		22	1.4	1.203	0.73	0.998	0.911	1.128	0.926706	0.990055	0.934324	0.996239	0.911926	0.801333	106.9	102.7	106.4	83.9	1.18838e+08	1.25662e+08	1.29253e+08	1.20776e+08	1.13283e+08	1.35663e+08	1.25104e+08	1.3516e+08	1.24334e+08	1.0758e+08	9.86703e+07	7.91916e+07	High	High	High	High	High	High
Master Protein	D6C500	HSP90-2 OS=Glycine max OX=3847 GN=100819568 PE=2 SV=1	0	385.389	58	35	357	4	699	80.1	5.06	874.75	35	8	7	7.308	7.007	0.413	2.165	2.719	0.849	8.31693e-05	0.021753	0.36399	2.46525e-10	2.34467e-05	0.946771	25.2	61.5	135.4	178	3.91613e+06	4.03089e+06	8.814e+06	8.30823e+06	9.84311e+06	3.16078e+07	2.16797e+07	2.08735e+07	5.78364e+07	1.65417e+07	2.84939e+07	5.4904e+07	High	High	High	High	High	High
Master Protein	C6TGD9	Uncharacterized protein OS=Glycine max OX=3847 GN=100814078 PE=2 SV=1	0	385.084	66	17	451	10	409	43.1	7.97	1467.13	17	17	7	1.331	1.221	0.843	1.105	0.954	1.071	0.959009	0.996849	0.999879	0.780458	0.949228	0.901091	98	95.8	112.2	94.1	5.4032e+08	4.22354e+08	5.82018e+08	4.7759e+08	5.28104e+08	5.35971e+08	5.79685e+08	6.18582e+08	6.45957e+08	7.68546e+08	5.1879e+08	4.62867e+08	High	High	High	High	High	High
Master Protein	C6TIQ5	PKS_ER domain-containing protein OS=Glycine max OX=3847 GN=100809668 PE=2 SV=1	0	384.503	90	26	450	21	343	37.9	6.32	1226.3	26	3	6	1.684	1.719	0.766	1.106	1.127	0.937	0.742349	0.866845	0.965652	0.779496	0.962043	0.999972	84.8	96.5	116.2	102.5	2.08727e+08	1.90935e+08	2.14081e+08	2.37635e+08	2.10156e+08	2.48194e+08	2.93589e+08	2.85962e+08	2.30364e+08	2.46858e+08	2.57606e+08	2.52403e+08	High	High	High	High	High	High
Master Protein	I1KV08	Uncharacterized protein OS=Glycine max OX=3847 GN=100794691 PE=3 SV=1	0	384.204	74	22	394	11	505	54.4	6.21	1114.04	22	8	0	0.849	0.977	1.04	0.909	0.96	0.883	0.704606	0.917702	0.883853	0.921242	0.950455	0.982511	119.7	92	88.6	99.8	5.64795e+07	5.88633e+07	5.8363e+07	5.64702e+07	4.48455e+07	4.01932e+07	4.32133e+07	5.24962e+07	3.8985e+07	4.86551e+07	5.54155e+07	3.28305e+07	High	High	High	High	High	High
Master Protein	I1L7G4	NADH dehydrogenase [ubiquinone] flavoprotein 1, mitochondrial OS=Glycine max OX=3847 GN=100810522 PE=3 SV=1	0	384.031	59	23	429	4	482	52.8	7.8	1125.58	23	10	0	1.371	1.256	0.707	0.921	0.855	1.008	0.947525	0.98808	0.948681	0.954669	0.826703	0.973791	99.4	108.6	104.1	87.9	2.71219e+07	2.3403e+07	2.14735e+07	2.55553e+07	2.60924e+07	2.50238e+07	2.34884e+07	2.52513e+07	2.45048e+07	1.06331e+07	2.20074e+07	2.06856e+07	High	High	High	High	High	High
Master Protein	C6F122	Beta-galactosidase OS=Glycine max OX=3847 GN=100792629 PE=3 SV=1	0	383.372	64	25	277	12	721	79.8	8.03	754.27	25	9	14	0.736	0.593	1.131	0.878	0.707	1.287	0.462103	0.404305	0.767512	0.780873	0.262952	0.396169	113	104.4	98.7	83.9	1.11638e+08	1.12766e+08	1.12e+08	1.10488e+08	1.00182e+08	1.03474e+08	1.02868e+08	8.30341e+07	9.77548e+07	9.92498e+07	7.97678e+07	8.31092e+07	High	High	High	High	High	High
Master Protein	A0A0R4J3G4	Uncharacterized protein OS=Glycine max OX=3847 GN=100790090 PE=3 SV=1	0	383.284	84	28	639	10	413	46.6	5.39	1511.33	28	6	1	1.097	1.794	0.954	0.999	1.668	0.64	0.963205	0.911511	0.948323	0.99582	0.161879	0.370261	104.8	89	101.5	104.6	2.25584e+07	1.46021e+07	1.77062e+07	1.50413e+07	1.69052e+07	1.30506e+07	1.7156e+07	1.95052e+07	1.44674e+07	2.66392e+07	1.76815e+07	9.61245e+06	High	High	High	High	High	High
Master Protein	O23960	Biotin carboxylase OS=Glycine max OX=3847 GN=accC-2 PE=2 SV=1	0	382.854	67	28	380	2	539	58.9	7.5	1110.56	28	5	27	0.917	0.898	0.992	0.957	0.946	1.034	0.815116	0.867693	0.913278	0.989478	0.943895	0.944988	122.2	99.9	95	82.8	2.84205e+08	2.87549e+08	2.62063e+08	2.4781e+08	2.32344e+08	2.08974e+08	2.21023e+08	1.94835e+08	2.36161e+08	1.92642e+08	2.16493e+08	1.89818e+08	High	High	High	High	High	High
Master Protein	A0A0R0JL19	Uncharacterized protein OS=Glycine max OX=3847 GN=100801918 PE=3 SV=1	0	381.562	78	21	1088	2	381	41	6.4	1903.27	21	6	0	9.172	6.545	0.217	1.265	1.322	0.957	3.55326e-06	0.0292654	0.00436602	0.240938	0.727017	0.996019	30.1	103.1	130.4	136.4	5.49507e+06	6.79249e+06	2.3889e+06	1.3163e+07	1.88354e+07	1.99758e+07	4.78892e+07	1.2581e+07	2.38247e+07	2.49052e+07	1.70315e+07	3.09782e+07	High	High	High	High	High	High
Master Protein	I1LWR5	UDP-glucose 6-dehydrogenase OS=Glycine max OX=3847 GN=100802280 PE=3 SV=1	0	381.553	69	23	446	2	480	53	6.46	1332.79	23	13	0	0.953	0.658	0.707	0.645	0.467	1.453	0.887656	0.674341	0.937259	0.0123541	0.00123154	0.17116	93.4	146.7	99.5	60.4	1.1495e+07	9.15184e+06	8.28557e+06	1.48356e+07	1.14422e+07	1.43668e+07	9.89167e+06	7.42104e+06	9.75124e+06	5.84051e+06	6.76681e+06	5.91367e+06	High	High	High	High	High	High
Master Protein	O81273	Biotin carboxylase OS=Glycine max OX=3847 GN=accC-3 PE=2 SV=1	0	381.076	67	28	388	2	539	58.8	7.5	1106.63	28	8	0	0.86	0.99	0.906	0.778	1.374	0.689	0.887243	0.951196	0.986228	0.4419	0.863026	0.655383	110.1	87.5	94.3	108	2.59189e+06	3.52749e+06	2.37063e+06	3.57894e+06	2.06018e+06	1.61918e+06	1.22959e+06	2.6997e+06	2.2203e+06	2.54314e+06	2.83364e+06	628833	High	High	High	High	High	High
Master Protein	A0A0R0FM59	Glucose-6-phosphate 1-dehydrogenase OS=Glycine max OX=3847 GN=100793462 PE=3 SV=1	0	380.601	75	35	442	10	518	59.2	6.14	1013.49	35	16	0	2.189	3.038	0.456	1.122	1.556	0.702	0.369139	0.326315	0.31047	0.726112	0.342099	0.518765	59.7	99.7	109.7	130.9	2.93852e+07	1.77781e+07	2.18058e+07	2.93423e+07	3.64126e+07	4.14994e+07	4.19727e+07	3.63521e+07	4.00806e+07	4.47854e+07	4.78256e+07	6.77981e+07	High	High	High	High	High	High
Master Protein	K7LNQ6	Thioredoxin reductase OS=Glycine max OX=3847 GN=100790557 PE=3 SV=1	0	380.5	73	18	288	5	372	40	8.21	935.99	18	11	13	0.761	0.694	1.187	0.891	0.889	1.06	0.527144	0.593153	0.693729	0.847205	0.868278	0.919741	117.8	98	92.5	91.7	1.63406e+08	1.55182e+08	1.50524e+08	1.40086e+08	1.28868e+08	1.29151e+08	1.07649e+08	1.25321e+08	1.21893e+08	1.37789e+08	1.20748e+08	9.32729e+07	High	High	High	High	High	High
Master Protein	I1MT10	Uncharacterized protein OS=Glycine max OX=3847 GN=100782173 PE=3 SV=1	0	379.797	57	28	479	2	645	70.8	5.39	1287.63	28	17	13	1.732	1.674	0.671	1.017	1.004	0.967	0.798632	0.932739	0.895041	0.984853	0.981998	0.982511	94	99	106.3	100.7	1.71255e+07	9.47007e+06	1.49173e+07	1.44912e+07	1.56981e+07	1.6883e+07	1.53259e+07	1.68631e+07	1.81626e+07	1.89469e+07	1.59092e+07	1.59757e+07	Peak Found	High	Peak Found	Peak Found	High	Peak Found
Master Protein	A0A0R4J4L8	AAA domain-containing protein OS=Glycine max OX=3847 GN=100819819 PE=3 SV=1	0	379.398	80	25	343	2	423	47.4	5.6	1002.65	25	11	24	1.043	1.06	0.902	0.986	1.038	0.928	0.926706	0.943719	0.976907	0.999252	0.999791	0.997603	105.6	97.9	100.9	95.6	1.22021e+08	1.15517e+08	1.18025e+08	1.09375e+08	1.18433e+08	1.04269e+08	1.12781e+08	1.01829e+08	1.1282e+08	1.11739e+08	1.06854e+08	9.70902e+07	High	High	High	High	High	High
Master Protein	I1ME12	Uncharacterized protein OS=Glycine max OX=3847 GN=100795026 PE=3 SV=2	0	379.182	61	39	325	1	823	90.5	6.99	813.21	39	15	38	1.242	1.472	0.743	0.916	1.065	0.848	0.993208	0.948061	0.95277	0.929939	0.996877	0.951431	80.9	110.3	105.9	103	5.66474e+07	6.44267e+07	5.27772e+07	7.72693e+07	7.82898e+07	6.55352e+07	7.7896e+07	7.41522e+07	6.24093e+07	7.21378e+07	6.42923e+07	8.28603e+07	High	Peak Found	Peak Found	High	High	High
Master Protein	I1MJE1	Succinate-semialdehyde dehydrogenase OS=Glycine max OX=3847 GN=100808318 PE=3 SV=2	0	378.513	58	24	315	11	495	52.8	6.32	967.55	24	15	14	1.281	1.357	0.843	1.018	1.122	0.841	0.979991	0.970352	0.999879	0.987496	0.963982	0.932779	82.8	94.7	100.6	121.9	1.14567e+08	9.65244e+07	1.03572e+08	1.01907e+08	1.28847e+08	1.18513e+08	1.25876e+08	1.48446e+08	1.15461e+08	1.24354e+08	1.57089e+08	1.52609e+08	High	High	High	High	High	High
Master Protein	I1JE12	Polyadenylate-binding protein OS=Glycine max OX=3847 GN=100813735 PE=3 SV=1	0	377.134	54	29	367	7	648	70.7	8.05	1152.91	29	2	25	1.402	1.946	0.754	0.932	1.062	0.866	0.925956	0.745234	0.955983	0.960671	0.996877	0.959904	84.4	102.8	92.3	120.5	3.18477e+08	3.11832e+08	2.83042e+08	3.43257e+08	3.8562e+08	3.8006e+08	4.05029e+08	3.4133e+08	3.26657e+08	3.48979e+08	4.45262e+08	4.49291e+08	High	High	High	High	High	High
Master Protein	I1MNX4	Glutathione reductase OS=Glycine max OX=3847 GN=100783766 PE=3 SV=1	0	376.269	54	23	416	9	501	54	5.85	1241.06	23	16	16	1.201	1.122	0.83	0.897	0.97	0.91	0.99894	0.966408	0.998779	0.869917	0.962043	0.984469	100.4	100.5	100	99.1	2.6833e+08	2.46598e+08	3.07236e+08	2.50434e+08	2.72286e+08	2.68495e+08	2.89908e+08	2.6716e+08	2.2353e+08	2.76961e+08	2.64713e+08	2.40694e+08	High	High	High	High	High	High
Master Protein	I1LZE1	Pyruvate kinase OS=Glycine max OX=3847 GN=100802271 PE=3 SV=1	0	376.133	70	25	379	2	527	57.6	6.9	1146.89	25	13	0	1.207	1.085	0.892	1.072	0.931	1.257	0.992333	0.967593	0.998779	0.94134	0.957982	0.638818	93.2	101.1	131.8	74	4.83443e+06	4.2137e+06	4.00741e+06	5.70767e+06	4.57017e+06	4.49691e+06	9.18643e+06	4.31198e+06	5.96084e+06	2.17195e+06	3.90133e+06	3.34585e+06	High	High	High	High	High	High
Master Protein	I1JED0	UDP-glucose 6-dehydrogenase OS=Glycine max OX=3847 GN=100799142 PE=3 SV=1	0	375.523	63	20	380	3	480	52.8	6.62	1096.45	20	2	0	0.504	0.352	1.022	0.596	0.352	1.659	0.151883	0.130575	0.883173	0.000461539	6.74302e-07	0.0178512	140.2	136.2	80.6	42.9	1.87489e+07	2.35149e+07	2.02443e+07	2.42657e+07	1.47756e+07	1.96669e+07	1.16411e+07	1.01241e+07	1.21071e+07	6.19811e+06	8.9348e+06	4.67877e+06	High	High	High	High	High	High
Master Protein	A0A368UK73	Alanine--tRNA ligase OS=Glycine max OX=3847 GN=GLYMA_11G102100 PE=3 SV=1	0	374.189	50	37	408	37	999	109.6	5.97	1009.09	37		0	1.315	1.627	0.697	0.918	1.133	0.795	0.966316	0.895314	0.896836	0.93802	0.957982	0.835024	82.1	102.8	93.2	121.9	1.14291e+08	1.05969e+08	9.30619e+07	1.3262e+08	1.49982e+08	1.20742e+08	1.2019e+08	1.35609e+08	1.16787e+08	1.72305e+08	1.28098e+08	1.57198e+08	High	High	High	High	High	High
Master Protein	I1KQ26	Aldedh domain-containing protein OS=Glycine max OX=3847 GN=100811540 PE=3 SV=1	0	374.131	70	29	358	8	501	54.4	6.42	964.27	29	8	20	1.118	0.983	1.03	1.135	1.006	1.208	0.97142	0.916317	0.883173	0.669026	0.983775	0.612471	131.9	82.7	98.5	86.8	4.20798e+08	3.0922e+08	3.60127e+08	2.72167e+08	2.17124e+08	2.25854e+08	4.36156e+08	2.1032e+08	2.68944e+08	2.35436e+08	2.48756e+08	2.36932e+08	High	High	High	High	High	High
Master Protein	I1LBD0	AA_TRNA_LIGASE_II domain-containing protein OS=Glycine max OX=3847 GN=100806082 PE=4 SV=1	0	374.089	68	28	319	8	447	51.3	6.43	996.33	28	10	20	0.905	1.175	1.231	1.055	1.237	0.921	0.799039	0.983615	0.635328	0.93802	0.859021	0.994635	127.4	89.5	95.5	87.6	1.29048e+08	1.66219e+08	1.46801e+08	8.83113e+07	1.22253e+08	1.03064e+08	1.10037e+08	9.67079e+07	1.30458e+08	9.92638e+07	1.48728e+08	1.00951e+08	High	High	High	High	High	High
Master Protein	I1L964	Pyruvate kinase OS=Glycine max OX=3847 GN=100801466 PE=3 SV=1	0	373.21	69	25	376	1	527	57.6	7.5	1111.49	25	10	25	1.254	1.209	0.869	1.074	1.07	0.998	0.990286	0.993442	0.990068	0.901868	0.995104	0.976006	97.9	97.2	106.4	98.4	1.86605e+08	1.75457e+08	1.57673e+08	1.97689e+08	1.74209e+08	1.62675e+08	2.10951e+08	1.63226e+08	1.90679e+08	2.30535e+08	1.36998e+08	1.76284e+08	Peak Found	High	Peak Found	High	High	Not Found
Master Protein	I1J4W3	Uncharacterized protein OS=Glycine max OX=3847 GN=100791015 PE=3 SV=1	0	372.565	65	28	283	6	660	73.1	7.23	751.92	28	1	14	1.68	2.25	0.502	0.793	1.102	0.696	0.7772	0.682645	0.483015	0.308672	0.983102	0.485087	74.6	114.4	94	117	2.40575e+07	2.85366e+07	2.61262e+07	3.28366e+07	4.0093e+07	5.44864e+07	2.0954e+07	4.62258e+07	3.29253e+07	6.22026e+07	4.09933e+07	4.08533e+07	Peak Found	High	High	High	High	High
Master Protein	I1JB64	NADH dehydrogenase [ubiquinone] flavoprotein 1, mitochondrial OS=Glycine max OX=3847 GN=100777389 PE=3 SV=1	0	372.348	59	24	441	5	482	52.9	8.05	1149.56	24	2	20	0.902	0.732	1.04	0.939	0.841	1.066	0.796293	0.657966	0.876658	0.967165	0.738366	0.909089	114.8	101.3	99.3	84.7	3.02718e+08	2.88688e+08	3.31361e+08	2.52326e+08	2.75047e+08	2.67218e+08	2.61884e+08	2.74025e+08	2.38221e+08	2.30611e+08	2.23339e+08	1.87957e+08	High	High	High	High	High	High
Master Protein	I1K970	PCI domain-containing protein OS=Glycine max OX=3847 GN=100780845 PE=4 SV=1	0	372.049	82	27	299	4	422	46.9	5.96	853.68	27	6	24	1.168	1.268	0.84	0.989	1.148	0.862	0.991535	0.999291	0.999964	0.997086	0.949866	0.955543	98.7	95.8	90.5	115	1.4514e+08	1.08151e+08	8.57781e+07	1.04923e+08	1.06539e+08	7.44566e+07	9.91798e+07	1.05367e+08	9.61027e+07	1.28653e+08	9.11561e+07	1.26018e+08	High	High	High	High	High	High
Master Protein	I1KXE7	Uncharacterized protein OS=Glycine max OX=3847 GN=100809224 PE=4 SV=1	0	371.892	58	28	288	28	570	64.2	4.98	973.41	28	8	0	3.116	4.981	0.378	1.047	1.281	0.922	0.02678	0.0126594	0.0609893	0.949153	0.781723	0.995201	58.4	103.3	112.5	125.9	7.56554e+07	7.39302e+07	6.31615e+07	7.52471e+07	1.3093e+08	1.59455e+08	1.71157e+08	1.28698e+08	1.42469e+08	1.59451e+08	1.36391e+08	2.10659e+08	High	High	High	High	High	High
Master Protein	I1JNC7	HP domain-containing protein OS=Glycine max OX=3847 GN=100803795 PE=4 SV=1	0	371.476	46	35	263	15	984	108.5	5.83	706.64	35	3	8	0.894	0.878	0.908	0.849	0.803	1.029	0.807735	0.876704	0.982743	0.674366	0.640745	0.954695	99.8	117.2	88.3	94.8	3.82932e+07	3.99358e+07	3.61724e+07	4.79697e+07	4.25483e+07	4.49739e+07	3.33369e+07	3.38788e+07	3.50572e+07	3.67255e+07	3.63918e+07	3.29796e+07	High	High	High	High	High	High
Master Protein	Q9SPB8	Malate dehydrogenase OS=Glycine max OX=3847 GN=Mdh1 PE=3 SV=1	0	371.406	72	15	396	4	345	36.1	8.12	1547.99	15	12	11	1.032	1.783	1.161	1.097	1.417	0.824	0.917628	0.833978	0.728839	0.813852	0.496081	0.905744	72.2	61.9	71.1	194.8	1.7311e+08	2.20545e+08	2.25926e+08	1.89121e+08	2.13179e+08	1.82819e+08	5.86584e+08	2.17021e+08	1.83849e+08	6.51591e+08	5.9499e+08	2.53396e+08	High	High	High	High	High	High
Master Protein	I1M2M2	Uncharacterized protein OS=Glycine max OX=3847 GN=100807752 PE=3 SV=1	0	371.262	59	38	315	1	826	90.9	6.99	788.41	38	13	0	4.025	8.206	0.221	0.765	1.512	0.491	0.793905	0.819826	0.773255	0.789693	0.947269	0.77518	22.5	101.8	90.7	185	16009.1	37730.5	5417.2	72293.6	110970	45720.6	71788.6	34982.2	64438.4	131364	64826.2	167770	Peak Found	Peak Found	Peak Found	Peak Found	Peak Found	Peak Found
Master Protein	I1MBC5	Asparagine synthetase [glutamine-hydrolyzing] OS=Glycine max OX=3847 GN=GLYMA_14G195000 PE=4 SV=1	0	370.954	66	26	472	7	581	65.5	6.47	1024.41	26	14	0	4.203	2.691	0.386	1.284	1.427	1.068	0.0092657	0.620874	0.227372	0.161083	0.479654	0.912346	33	87.1	140.1	139.8	7.55734e+06	7.57606e+06	9.95411e+06	1.18057e+07	2.82074e+07	1.99876e+07	3.22935e+06	3.21621e+07	4.69413e+07	3.21054e+07	2.27741e+07	3.89351e+07	High	High	High	High	High	High
Master Protein	I1J637	Uncharacterized protein OS=Glycine max OX=3847 GN=100788017 PE=4 SV=1	0	370.92	82	26	436	6	368	41.7	5.78	1057.09	26	1	22	0.954	0.594	1.314	1.339	0.804	1.604	0.856572	0.387735	0.513671	0.0322285	0.615834	0.0322071	127.5	80.3	120.9	71.4	4.65348e+08	3.59839e+08	4.1601e+08	2.61957e+08	2.82354e+08	2.41247e+08	4.24688e+08	2.28754e+08	3.94581e+08	2.32922e+08	1.93441e+08	2.36951e+08	High	High	High	High	High	High
Master Protein	I1KGJ0	Uncharacterized protein OS=Glycine max OX=3847 GN=100806025 PE=3 SV=1	0	370.567	39	46	278	9	1482	167.6	7.93	594.22	46	7	37	1.871	2.06	0.567	1.094	1.207	0.897	0.567491	0.754404	0.669083	0.796405	0.914019	0.983378	81.1	96.8	99.2	122.9	3.3282e+07	4.86162e+07	4.95181e+07	6.45522e+07	5.80154e+07	4.91008e+07	5.87051e+07	7.43174e+07	5.94518e+07	9.39556e+07	5.49448e+07	7.36743e+07	High	High	Peak Found	High	High	High
Master Protein	K7KA00	Serine hydroxymethyltransferase OS=Glycine max OX=3847 GN=100816213 PE=3 SV=1	0	369.242	78	27	403	7	499	55.3	8.13	1223.36	27	2	1	1.542	2.145	0.684	1.044	1.019	1.003	0.871142	0.775884	0.925529	0.967018	0.995104	0.978859	93.9	100.5	104.2	101.3	2.23732e+07	2.23343e+07	2.41685e+07	2.19286e+07	2.54675e+07	2.39431e+07	2.48115e+07	2.38321e+07	2.87548e+07	1.84296e+07	2.41341e+07	2.64758e+07	High	High	High	High	High	High
Master Protein	I1M0B5	Uncharacterized protein OS=Glycine max OX=3847 GN=GLYMA_13G180400 PE=4 SV=1	0	367.439	67	25	290	25	490	53.8	5.34	964.39	25	13	0	1.162	1.168	0.909	1.037	1.043	0.959	0.989222	0.980901	0.972119	0.967018	0.999952	0.989982	84.6	99.8	105.2	110.4	1.11087e+08	1.15378e+08	1.09499e+08	1.15739e+08	1.31027e+08	1.35593e+08	1.38172e+08	1.21488e+08	1.42921e+08	1.26813e+08	1.49246e+08	1.44997e+08	High	High	High	High	High	High
Master Protein	I1LJ90	Coatomer subunit alpha OS=Glycine max OX=3847 GN=100781504 PE=4 SV=1	0	366.997	42	38	236	6	1221	136.7	6.96	580.81	38	11	17	1.524	1.978	0.673	0.967	1.334	0.722	0.895205	0.871787	0.911798	0.996239	0.681134	0.655157	81.4	98.3	103	117.3	1.30075e+07	1.81973e+07	2.07023e+07	2.77461e+07	1.96602e+07	2.1973e+07	1.6592e+07	2.30269e+07	2.50329e+07	3.36829e+07	2.27697e+07	2.62087e+07	High	Peak Found	Peak Found	High	High	High
Master Protein	I1JEI0	Uncharacterized protein OS=Glycine max OX=3847 GN=GLYMA_02G120900 PE=4 SV=2	0	366.624	87	26	409	7	368	41.5	5.97	987.65	26	2	0	1.082	1.022	0.988	1.2	0.972	1.169	0.956856	0.928481	0.896363	0.418112	0.963895	0.742235	86.8	95.7	124.7	92.8	2.40909e+07	2.68747e+07	1.74258e+07	2.65747e+07	2.71319e+07	2.51485e+07	3.46185e+07	2.02069e+07	3.73716e+07	3.63333e+07	2.11512e+07	2.57667e+07	High	High	High	High	High	High
Master Protein	K7KRR3	Malic enzyme OS=Glycine max OX=3847 GN=100782096 PE=3 SV=1	0	366.331	58	25	766	10	591	65.4	6.81	2030.57	25	5	2	1.466	1.395	0.832	1.121	1.153	0.969	0.923341	0.978016	0.999879	0.768348	0.947453	0.982511	76	107.3	103.4	113.2	1.70753e+07	1.29911e+07	1.13902e+07	1.24154e+07	1.83308e+07	1.92245e+07	2.601e+07	1.76667e+07	1.73853e+07	2.53766e+07	1.93431e+07	1.89908e+07	High	High	High	High	High	High
Master Protein	I1KNS5	Uncharacterized protein OS=Glycine max OX=3847 GN=100809385 PE=3 SV=2	0	366.177	46	37	398	6	914	99.5	8.98	1037.85	37	7	0	1.346	0.84	0.655	0.933	0.844	1.073	0.967829	0.830658	0.893416	0.969403	0.771503	0.883727	94.3	118.5	108	79.3	1.46328e+07	1.13683e+07	1.02618e+07	1.15956e+07	1.43687e+07	1.4288e+07	1.30188e+07	1.09449e+07	1.39568e+07	4.55024e+06	1.1552e+07	9.56236e+06	High	High	High	High	High	High
Master Protein	I1M9S1	Plasma membrane ATPase OS=Glycine max OX=3847 GN=100791692 PE=3 SV=2	0	365.937	37	30	326	5	951	104.6	7.21	807.37	30	14	5	2.345	3.045	0.512	1.197	1.374	0.784	0.463769	0.467454	0.644705	0.616299	0.681134	0.842313	47.9	96.2	134.1	121.8	5.38563e+06	4.42806e+06	5.09058e+06	1.07881e+07	1.02257e+07	8.96224e+06	8.89149e+06	1.5828e+07	1.42585e+07	1.2946e+07	1.04093e+07	2.05641e+07	Peak Found	Peak Found	Peak Found	Peak Found	High	Peak Found
Master Protein	I1MYB9	Protein transport protein SEC23 OS=Glycine max OX=3847 GN=100813940 PE=3 SV=1	0	365.933	59	27	260	8	766	84.3	6.21	749.3	27	18	20	1.701	1.9	0.579	0.963	1.077	0.827	0.742474	0.819826	0.689512	0.99582	0.996877	0.930893	90.8	109.5	100.9	98.8	3.25485e+07	4.65725e+07	4.21396e+07	6.39904e+07	5.08293e+07	4.8169e+07	4.65513e+07	5.34258e+07	4.6832e+07	8.10141e+07	4.39456e+07	4.58792e+07	High	High	High	High	High	High
Master Protein	I1L983	Fructose-bisphosphate aldolase OS=Glycine max OX=3847 GN=GLYMA_10G066700 PE=3 SV=1	0	365.636	80	23	614	6	358	38.5	7.68	1644.6	23	10	13	1.467	1.255	0.914	1.319	1.068	1.092	0.887076	0.999291	0.969811	0.0504053	0.996442	0.863523	97.6	93.6	116.8	92	4.32727e+08	4.01204e+08	5.03043e+08	3.54669e+08	4.149e+08	4.1903e+08	4.13528e+08	5.17469e+08	6.44621e+08	4.07688e+08	3.90615e+08	4.57531e+08	High	High	High	High	High	High
Master Protein	I1KS56	Uncharacterized protein OS=Glycine max OX=3847 GN=GLYMA_08G107800 PE=4 SV=1	0	365.084	52	33	237	4	916	100.3	7.74	581.85	33	8	29	1.491	1.578	0.708	1.06	1.128	0.853	0.874591	0.928296	0.913278	0.92093	0.96582	0.947539	96.9	103.7	93.8	105.6	3.74692e+07	4.40981e+07	4.74278e+07	5.39364e+07	4.71628e+07	3.41754e+07	4.26758e+07	4.60933e+07	4.12613e+07	7.56847e+07	3.65924e+07	4.80274e+07	High	High	High	High	High	High
Master Protein	I1LZG1	Fructose-bisphosphate aldolase OS=Glycine max OX=3847 GN=100815070 PE=3 SV=1	0	364.952	80	22	552	5	358	38.4	7.06	1495.72	22	13	0	1.075	0.888	1.246	1.334	1.066	1.16	0.94565	0.878161	0.664719	0.0425916	0.992444	0.754924	98.2	92.2	116.1	93.5	3.27048e+07	3.27044e+07	4.25042e+07	2.48736e+07	3.09729e+07	3.0728e+07	2.86957e+07	3.86665e+07	4.43136e+07	3.11504e+07	3.05385e+07	3.48624e+07	High	High	High	High	High	High
Master Protein	I1JSP6	Coatomer subunit gamma OS=Glycine max OX=3847 GN=100814149 PE=3 SV=1	0	364.38	59	39	250	3	886	98.5	5.21	567.53	39	4	13	1.192	1.43	0.946	1.118	1.332	0.873	0.99762	0.957897	0.960104	0.738035	0.727017	0.966172	124.3	98.6	93.5	83.7	3.69199e+07	5.24833e+07	5.17195e+07	4.38886e+07	4.10249e+07	3.86803e+07	2.81711e+07	4.87246e+07	3.89193e+07	6.05004e+07	3.48183e+07	1.72592e+07	Peak Found	Peak Found	Peak Found	High	High	High
Master Protein	I1K5E6	WD_REPEATS_REGION domain-containing protein OS=Glycine max OX=3847 GN=GLYMA_05G243800 PE=4 SV=1	0	363.794	80	20	712	2	325	35.6	7.72	1967.77	20	5	0	1.553	3.828	0.58	0.974	1.747	0.535	0.900663	0.282817	0.777203	0.996018	0.120511	0.0457307	50.8	95.4	96.3	157.4	6.90053e+06	5.62876e+06	2.99019e+06	1.05792e+07	1.21472e+07	1.04217e+07	1.09898e+07	9.7407e+06	1.06777e+07	2.5714e+07	1.39655e+07	1.74485e+07	High	High	High	High	High	High
Master Protein	I1JUQ0	PCI domain-containing protein OS=Glycine max OX=3847 GN=GLYMA_04G078200 PE=4 SV=1	0	363.273	81	26	290	2	422	46.9	5.96	829.76	26	4	1	0.702	0.778	1.191	0.963	0.981	0.9	0.653876	0.860398	0.837936	0.994467	0.969142	0.983378	106.8	103.5	90.6	99.1	9.13607e+06	6.90772e+06	6.30161e+06	7.67748e+06	6.6964e+06	5.04121e+06	5.43853e+06	7.22092e+06	5.86377e+06	3.55534e+06	6.40812e+06	7.6509e+06	High	High	High	High	High	High
Master Protein	I1KZJ1	Uncharacterized protein OS=Glycine max OX=3847 GN=100807267 PE=3 SV=1	0	363.197	75	22	398	2	392	43	5.54	1434.04	22	8	20	2.103	1.704	0.653	1.106	1.184	0.933	0.364782	0.871514	0.830698	0.779496	0.91969	0.997906	79.4	99.5	105.6	115.5	2.84586e+08	3.02894e+08	3.31294e+08	3.79377e+08	3.97877e+08	3.34984e+08	4.02631e+08	3.60316e+08	4.21357e+08	4.40705e+08	4.30136e+08	4.94406e+08	High	High	High	High	High	High
Master Protein	A0A0R0K737	6-phosphogluconate dehydrogenase, decarboxylating OS=Glycine max OX=3847 GN=GLYMA_05G214000 PE=3 SV=1	0	363.139	73	29	442	5	479	52.2	6.7	1198.18	29		0	0.703	0.946	1.027	0.947	0.947	0.825	0.557504	0.906046	0.911306	0.981606	0.941828	0.932779	149	76.9	96.5	77.5	1.73351e+07	1.51163e+07	2.48589e+07	1.6882e+07	8.95015e+06	3.97207e+06	4.09545e+06	1.54703e+07	1.12288e+07	1.48941e+07	9.02136e+06	182624	High	High	High	High	High	Peak Found
Master Protein	I1M984	AA_TRNA_LIGASE_II domain-containing protein OS=Glycine max OX=3847 GN=100788164 PE=3 SV=1	0	362.993	70	33	431	8	543	60.2	6.1	1056.41	33	14	0	0.914	1.065	1.015	0.997	1.055	0.938	0.83247	0.942947	0.909316	0.996018	0.998682	0.997603	104	103.4	96	96.5	3.70964e+07	3.55102e+07	3.40802e+07	3.59027e+07	3.52959e+07	2.89845e+07	3.27769e+07	3.52765e+07	2.68865e+07	4.23828e+07	3.29434e+07	3.22312e+07	High	High	High	High	High	High
Master Protein	A0A0R4J364	Uncharacterized protein OS=Glycine max OX=3847 GN=GLYMA_04G240800 PE=3 SV=1	0	362.703	78	21	1088	2	380	40.9	6.4	1891.53	21	4	23	1.782	1.219	0.617	1.057	0.809	1.526	0.65205	0.995896	0.751273	0.936156	0.631456	0.0674556	82.6	110.7	108.6	98	9.86489e+08	8.34867e+08	7.38862e+08	1.12716e+09	1.11916e+09	1.10437e+09	2.05505e+09	1.01231e+09	1.09756e+09	1.18584e+09	7.72274e+08	9.90565e+08	Peak Found	High	High	High	High	Peak Found
Master Protein	I1J5Y9	UDP-glucose 6-dehydrogenase OS=Glycine max OX=3847 GN=GLYMA_01G057100 PE=3 SV=1	0	361.994	63	20	395	2	480	52.9	6.79	1125.41	20	1	13	0.703	0.561	0.853	0.638	0.486	1.292	0.384704	0.320822	0.99875	0.000407272	0.00086397	0.404083	121.3	135.6	84.5	58.5	1.58132e+08	1.91509e+08	1.4392e+08	2.16172e+08	1.45182e+08	1.76852e+08	1.10183e+08	9.50805e+07	1.28065e+08	6.34957e+07	8.95178e+07	7.63304e+07	High	High	High	High	High	High
Master Protein	K7L5V1	Signal recognition particle subunit SRP72 OS=Glycine max OX=3847 GN=100810125 PE=3 SV=1	0	361.77	62	33	274	15	662	72.9	9.01	692.57	33	8	17	1.333	1.33	0.651	0.857	0.9	0.982	0.958883	0.983697	0.837092	0.679562	0.889077	0.981329	86.7	111.7	99	102.5	7.04469e+07	6.86482e+07	5.41542e+07	8.24891e+07	8.84667e+07	9.63295e+07	9.22675e+07	7.84024e+07	6.76599e+07	4.46861e+07	8.11917e+07	9.79495e+07	High	High	High	High	High	High
Master Protein	I1JHJ8	Uncharacterized protein OS=Glycine max OX=3847 GN=100810328 PE=4 SV=1	0	361.352	49	39	237	15	995	109.9	6.33	602.38	39	2	23	1.188	1.421	0.829	1.049	1.202	0.878	0.997285	0.962445	0.998222	0.938265	0.91969	0.97601	93.9	94	98.7	113.4	5.99408e+07	4.8215e+07	4.52431e+07	4.82756e+07	5.05457e+07	4.30948e+07	5.06502e+07	4.35936e+07	5.77022e+07	5.38926e+07	5.8188e+07	5.90665e+07	High	High	High	High	High	High
Master Protein	P26690	NAD(P)H-dependent 6'-deoxychalcone synthase OS=Glycine max OX=3847 PE=1 SV=1	0	360.865	86	20	289	9	315	35.5	6.8	973.01	20	14	14	1.054	1.178	1.158	1.254	1.149	1.006	0.935994	0.983851	0.732372	0.167825	0.949131	0.97102	127.9	80.3	114.6	77.2	1.7891e+08	1.87016e+08	1.53088e+08	1.12342e+08	1.22655e+08	1.05875e+08	1.93594e+08	8.71516e+07	1.6036e+08	1.90717e+08	1.05616e+08	1.0804e+08	High	High	High	High	High	High
Master Protein	C6TJD3	WD_REPEATS_REGION domain-containing protein OS=Glycine max OX=3847 GN=100778205 PE=2 SV=1	0	360.83	80	20	708	2	325	35.7	7.72	1978.18	20	8	19	1.048	0.965	0.915	0.961	0.972	0.962	0.930569	0.90804	0.969592	0.993579	0.96262	0.986679	101	103	96.6	99.5	9.73586e+08	8.80418e+08	8.69057e+08	8.98961e+08	8.53491e+08	8.97544e+08	8.02236e+08	8.99274e+08	8.41969e+08	9.48217e+08	8.6726e+08	7.6911e+08	High	High	High	High	High	High
Master Protein	I1LLH3	MGS domain-containing protein OS=Glycine max OX=3847 GN=100780790 PE=3 SV=1	0	360.146	60	27	475	5	609	65.7	6.57	1091.49	27	11	0	1.127	1.32	0.828	0.907	0.935	0.872	0.973254	0.999972	0.998222	0.937548	0.941295	0.976026	94.4	113.3	99.6	92.6	1.84254e+07	2.17522e+07	1.89819e+07	2.27805e+07	1.88977e+07	2.39592e+07	2.0026e+07	2.1914e+07	1.9084e+07	2.96324e+07	1.86195e+07	1.73391e+07	High	High	High	High	High	High
Master Protein	I1JJL6	HATPase_c domain-containing protein OS=Glycine max OX=3847 GN=GLYMA_02G302500 PE=3 SV=1	0	359.691	55	34	345	3	702	80.3	5.06	816.85	34	2	0	2.688	2.983	0.8	2.125	1.483	1.319	0.311435	0.590387	0.989918	4.70159e-07	0.691904	0.465908	22.2	43.7	179.4	154.7	642685	507682	2.36676e+06	594682	1.26562e+06	5.36148e+06	3.1616e+06	5.19127e+06	1.11014e+07	2.04802e+06	4.47793e+06	7.82364e+06	High	Peak Found	High	High	Peak Found	High
Master Protein	I1MEK0	Eukaryotic translation initiation factor 3 subunit D OS=Glycine max OX=3847 GN=100799613 PE=3 SV=1	0	359.668	64	23	249	6	565	64.3	5.71	851.84	23	15	17	1.243	2.063	0.731	0.959	1.243	0.752	0.993208	0.682013	0.93448	0.992472	0.851025	0.705234	108	94.9	100.8	96.3	1.17816e+08	8.90275e+07	1.14275e+08	1.0034e+08	9.76477e+07	1.24468e+08	9.91074e+07	1.06585e+08	1.24391e+08	1.01877e+08	1.23128e+08	9.77111e+07	High	High	High	High	High	High
Master Protein	Q6TXD0	3-ketoacyl-CoA thiolase OS=Glycine max OX=3847 GN=547735 PE=2 SV=1	0	358.786	60	18	354	5	445	47	8.47	1121.6	18	20	0	0.625	0.745	1.382	0.851	1.05	0.792	0.328488	0.692548	0.437738	0.757426	0.999952	0.861142	140.5	73.1	69	117.4	3.41543e+07	2.40783e+07	3.46568e+07	1.77707e+07	1.69151e+07	1.89197e+07	2.31363e+07	1.67738e+07	1.47653e+07	3.28646e+07	2.85263e+07	2.32407e+07	High	High	High	High	High	High
Master Protein	F8SMC3	Glucose-6-phosphate 1-dehydrogenase OS=Glycine max OX=3847 GN=100817852 PE=2 SV=1	0	358.3	77	37	486	11	518	59.3	6.77	1155.13	37	19	25	1.338	1.394	0.811	1.015	1.122	0.898	0.955472	0.962445	0.990675	0.989478	0.963895	0.982511	87.4	99.5	101.5	111.7	2.46389e+08	2.06531e+08	2.41204e+08	2.73976e+08	2.74507e+08	2.86732e+08	2.63429e+08	2.90607e+08	2.80029e+08	2.81836e+08	3.08225e+08	3.25415e+08	High	High	High	High	High	High
Master Protein	K7M028	Uncharacterized protein OS=Glycine max OX=3847 GN=100799941 PE=4 SV=1	0	357.522	45	35	340	2	1132	124.6	7.06	771.68	35	13	23	1.512	1.345	0.682	0.962	0.983	0.9	0.87391	0.983615	0.887437	0.99582	0.964909	0.982511	92.1	102.6	96.9	108.4	3.05757e+07	4.05005e+07	3.807e+07	4.60772e+07	4.24278e+07	4.06366e+07	3.26654e+07	4.58611e+07	4.00789e+07	5.01882e+07	3.87099e+07	4.48394e+07	High	High	Peak Found	Peak Found	High	Peak Found
Master Protein	I1K778	Coatomer subunit gamma OS=Glycine max OX=3847 GN=100784608 PE=3 SV=1	0	357.165	60	39	235	7	882	98.2	5.2	530.89	39	6	0	1.108	1.497	0.909	0.994	1.42	0.724	0.984775	0.95244	0.990702	0.997086	0.664076	0.675557	84.8	92.9	101.7	120.5	3.96416e+06	6.63379e+06	5.75178e+06	7.79552e+06	6.30205e+06	5.38077e+06	5.15031e+06	7.56348e+06	6.89718e+06	8.17423e+06	5.60278e+06	9.00404e+06	High	High	High	High	High	High
Master Protein	A0A0R0FUV4	Uncharacterized protein OS=Glycine max OX=3847 GN=100809395 PE=3 SV=1	0	355.725	83	26	540	5	413	46.6	5.55	1205.27	26	15; 13	0	0.59	0.581	1.449	0.749	0.914	0.902	0.247215	0.439651	0.351878	0.209072	0.915008	0.989404	143.2	91.5	84.3	81	2.86325e+07	3.31697e+07	2.7058e+07	2.40749e+07	1.82802e+07	1.24986e+07	1.20076e+07	1.69352e+07	1.68509e+07	1.91798e+07	1.61901e+07	1.48387e+07	High	High	High	High	Peak Found	High
Master Protein	I1JWZ3	Plasma membrane ATPase OS=Glycine max OX=3847 GN=100818043 PE=3 SV=1	0	354.193	36	29	309	2	956	105.2	6.73	809.59	29	4	11	1.488	1.689	0.716	1.144	1.284	0.902	0.916799	0.931088	0.947228	0.716401	0.801918	0.989404	58.3	92.2	106.2	143.3	8.90834e+06	9.4749e+06	8.91414e+06	1.45746e+07	1.40813e+07	1.38686e+07	1.48548e+07	1.62291e+07	1.83899e+07	2.29442e+07	1.35412e+07	2.18862e+07	Peak Found	Peak Found	Peak Found	Peak Found	High	High
Master Protein	A0A0R4J439	AAA domain-containing protein OS=Glycine max OX=3847 GN=100783293 PE=3 SV=1	0	354.063	67	24	391	2	443	49.3	6.21	1082.92	24	10	0	2.69	6.898	0.702	1.03	1.572	0.658	0.299744	0.0525873	0.918648	0.989478	0.575763	0.56835	104.3	98.7	78.3	118.6	2.64021e+06	5.1709e+06	3.38638e+06	3.20565e+06	4.12145e+06	2.32656e+06	2.07008e+06	2.54243e+06	4.43238e+06	2.5096e+06	5.4e+06	3.85065e+06	High	High	High	High	High	High
Master Protein	I1N520	Chalcone reductase OS=Glycine max OX=3847 GN=100820161 PE=2 SV=1	0	354.019	76	20	341	20	315	35.1	6.55	1044.57	20	18	0	0.841	0.748	1.284	1.066	0.944	1.177	0.690365	0.681316	0.564255	0.920521	0.940904	0.690243	121.3	98	95.9	84.8	4.07113e+08	3.30975e+08	3.14627e+08	2.91837e+08	2.67457e+08	2.12952e+08	4.25087e+08	1.90954e+08	2.61769e+08	2.65778e+08	2.11011e+08	2.31354e+08	High	High	High	High	High	High
Master Protein	I1N1X2	Uncharacterized protein OS=Glycine max OX=3847 GN=100778091 PE=4 SV=1	0	354.018	70	27	296	18	488	54.2	5.67	808.93	27	18	9	0.925	0.912	1.085	1.023	1.03	0.975	0.825846	0.884909	0.821956	0.981606	0.996877	0.982744	103.2	89.6	107.8	99.4	8.93646e+07	8.52711e+07	9.33603e+07	8.81753e+07	7.75762e+07	7.60736e+07	8.10252e+07	9.3324e+07	9.44525e+07	9.0138e+07	8.60758e+07	7.82173e+07	High	High	High	High	High	High
Master Protein	I1LNE6	Uncharacterized protein OS=Glycine max OX=3847 GN=100817323 PE=3 SV=1	0	353.834	65	31	367	31	535	59.2	5.85	1041.89	31	11	0	1.197	1.537	0.841	0.977	1.282	0.786	0.99762	0.928481	0.999879	0.996239	0.781681	0.809392	95.1	99.7	89.2	116	1.75487e+08	1.09835e+08	1.06334e+08	1.15132e+08	1.27364e+08	8.35783e+07	1.04479e+08	9.69297e+07	1.03098e+08	1.66227e+08	1.1138e+08	1.3405e+08	High	High	High	High	High	High
Master Protein	K7LNG5	Isoflavone reductase OS=Glycine max OX=3847 GN=IFR4 PE=2 SV=1	0	353.465	84	26	620	11	318	35.6	5.73	1556.77	26	11	0	1.166	1.464	0.917	1.143	1.323	0.863	0.991026	0.960385	0.968877	0.615047	0.708701	0.969294	125.3	85.2	96.9	92.6	9.42602e+07	1.03637e+08	8.90224e+07	7.11365e+07	5.4454e+07	6.40779e+07	9.62709e+07	6.7831e+07	7.28869e+07	1.15612e+08	6.96843e+07	5.26391e+07	High	High	High	High	High	High
Master Protein	A0A0R0L0W8	UTP--glucose-1-phosphate uridylyltransferase OS=Glycine max OX=3847 GN=GLYMA_02G241100 PE=3 SV=1	0	353.342	69	25	697	6	451	49.2	5.38	1680.06	25		0	1.674	1.787	0.545	0.978	0.904	1.044	0.803278	0.903424	0.677737	0.996259	0.911447	0.938522	57.4	117.4	123.1	102.2	2.63651e+07	1.65356e+07	1.41791e+07	2.92148e+07	3.53862e+07	3.38256e+07	3.58279e+07	2.23051e+07	3.54622e+07	2.09033e+07	2.94407e+07	4.38544e+07	High	High	High	High	High	High
Master Protein	I1KM25	Polyadenylate-binding protein OS=Glycine max OX=3847 GN=100780329 PE=3 SV=1	0	352.381	47	23	341	2	651	70.9	7.75	1154.28	23	7	0	1.458	3.621	0.971	1.433	1.531	0.518	0.927987	0.304743	0.949553	0.0422211	0.387894	0.0176936	82.6	79.7	121.9	115.8	9.92486e+06	3.63231e+06	1.38054e+07	1.02507e+07	9.56662e+06	9.27593e+06	6.62527e+06	1.46375e+07	1.49071e+07	2.51467e+07	1.39069e+07	2.37754e+06	High	High	High	High	High	High
Master Protein	K7MQT5	Imidazole glycerol phosphate synthase hisHF OS=Glycine max OX=3847 GN=100500353 PE=3 SV=1	0	352.229	64	28	342	4	580	63	6.25	963.65	28	18	24	1.114	1.067	0.864	0.984	0.967	0.999	0.968694	0.947802	0.994787	0.999892	0.957982	0.975139	103.2	104.1	93.1	99.6	1.06061e+08	1.03777e+08	1.14913e+08	1.07499e+08	9.80558e+07	1.07063e+08	9.56722e+07	1.1204e+08	9.20702e+07	9.31246e+07	1.12531e+08	1.02402e+08	High	High	High	High	High	High
Master Protein	I1MZA8	Glutamine amidotransferase type-1 domain-containing protein OS=Glycine max OX=3847 GN=GLYMA_18G036300 PE=3 SV=2	0	351.946	35	38	282	8	1391	152.2	5.35	622.67	38	18	0	1.073	1.297	0.823	0.859	1.015	0.827	0.975735	0.981451	0.986529	0.839496	0.994546	0.944057	87.7	87.8	94.2	130.3	4.87577e+06	7.13904e+06	5.00068e+06	6.1816e+06	4.49693e+06	5.00578e+06	3.83305e+06	6.32474e+06	5.37355e+06	8.99618e+06	5.16105e+06	7.43173e+06	High	High	High	High	High	Peak Found
Master Protein	I1J8A4	Thioredoxin reductase OS=Glycine max OX=3847 GN=100786086 PE=3 SV=2	0	351.824	58	15	267	2	370	39.7	8.4	868.14	15	1	0	0.8	0.683	1.001	0.953	0.828	1.313	0.834203	0.788058	0.955983	0.99582	0.854361	0.601127	131.1	133.4	77.8	57.7	5.1202e+06	4.96153e+06	4.78564e+06	5.30082e+06	5.05014e+06	3.85614e+06	2.8302e+06	4.82726e+06	2.94658e+06	4.44135e+06	2.1834e+06	1.85716e+06	High	High	High	High	High	High
Master Protein	A0A0R4J3J1	Peroxidase OS=Glycine max OX=3847 GN=GLYMA_06G302600 PE=3 SV=1	0	351.823	56	16	532	12	324	35.2	8.06	1562.74	16	6	3	0.521	0.248	1.851	1.068	0.521	2.268	0.0656811	0.00200584	0.0648136	0.915651	0.00355016	1.61817e-05	184.2	77.3	98.6	39.9	1.01384e+09	1.35958e+09	1.5064e+09	8.10298e+08	4.22748e+08	5.7048e+08	7.27859e+08	4.77172e+08	7.56624e+08	2.94449e+08	3.58044e+08	2.49969e+08	High	High	High	High	High	High
Master Protein	I1J9Y0	Uncharacterized protein OS=Glycine max OX=3847 GN=100776102 PE=4 SV=1	0	351.336	57	31	420	10	585	65.6	6.46	853.87	31	1	0	3.54	4.451	0.367	1.035	1.148	0.823	0.047252	0.139677	0.13319	0.967716	0.949131	0.919741	91.4	103.6	88.2	116.8	1.63517e+07	2.24561e+07	2.2656e+07	1.82842e+07	2.54645e+07	2.89712e+07	1.89187e+07	2.16693e+07	2.37644e+07	1.37187e+07	2.86988e+07	3.31456e+07	High	High	High	High	High	High
Master Protein	I1JPQ2	S-adenosylmethionine synthase OS=Glycine max OX=3847 GN=100794248 PE=3 SV=1	0	350.716	71	21	1304	9	390	42.7	6.6	3246.23	21	3	4	0.679	0.626	1.302	0.893	0.819	1.204	0.330511	0.513846	0.543091	0.855951	0.701925	0.628577	130.3	91.4	98.1	80.2	6.00235e+07	7.83394e+07	6.41449e+07	6.07408e+07	4.29612e+07	4.49631e+07	3.84231e+07	4.82742e+07	4.84547e+07	4.19252e+07	3.94739e+07	2.61336e+07	High	High	High	High	High	High
Master Protein	A0A0R4J2L9	Malate dehydrogenase OS=Glycine max OX=3847 GN=GLYMA_02G005500 PE=3 SV=1	0	350.485	65	14	1210	2	332	35.4	6.3	3116.42	14	2	0	1.075	0.938	1.034	1.104	0.97	1.091	0.946065	0.891753	0.882764	0.788548	0.961853	0.865929	97.3	94	104.6	104.1	1.19167e+08	6.99359e+07	9.42878e+07	9.11573e+07	9.06535e+07	9.23748e+07	1.01394e+08	8.02264e+07	1.01944e+08	1.00865e+08	8.84113e+07	1.11262e+08	High	High	High	High	High	High
Master Protein	I1K3J0	Signal recognition particle subunit SRP72 OS=Glycine max OX=3847 GN=100791472 PE=3 SV=1	0	350.37	59	32	300	14	662	73.1	8.91	727.81	32	5	0	1.322	1.635	0.673	0.882	0.978	0.867	0.973215	0.940274	0.913278	0.857586	0.966604	0.978544	76.5	105	94.1	124.4	1.62128e+07	1.63182e+07	1.13511e+07	2.01458e+07	2.22363e+07	2.57057e+07	2.3352e+07	1.99312e+07	1.90852e+07	1.26292e+07	2.63448e+07	2.83232e+07	High	High	High	High	High	High
Master Protein	H2D5S3	Malate dehydrogenase OS=Glycine max OX=3847 GN=100811402 PE=2 SV=1	0	350.122	64	14	1184	2	328	35.2	6.3	3065.9	14	10	15	1.411	1.68	0.883	1.161	1.173	0.992	0.920441	0.881068	0.986228	0.552577	0.931451	0.981329	69.6	97	113.2	120.2	1.08639e+09	8.38101e+08	9.13332e+08	9.23074e+08	1.27148e+09	1.38397e+09	1.98039e+09	9.23777e+08	1.48435e+09	1.97379e+09	1.54028e+09	1.57612e+09	High	High	High	High	High	High
Master Protein	I1NFG9	Uncharacterized protein OS=Glycine max OX=3847 GN=100811658 PE=4 SV=1	0	349.97	62	23	210	3	585	65.5	5.07	656.61	23	20	12	0.908	0.981	1.171	1.074	1.214	0.797	0.832254	0.909489	0.735723	0.914321	0.892245	0.828436	112	92.5	101.5	93.9	4.59357e+07	3.53327e+07	3.28821e+07	3.765e+07	2.91952e+07	2.26474e+07	2.3938e+07	3.51934e+07	3.20276e+07	5.07597e+07	2.96284e+07	2.95741e+07	High	High	High	High	High	High
Master Protein	I1K693	Uncharacterized protein OS=Glycine max OX=3847 GN=GLYMA_05G217300 PE=3 SV=1	0	349.409	66	39	314	2	610	68.3	7.99	773.19	39	5	37	0.909	1.003	1.04	0.948	1.057	0.954	0.802147	0.928589	0.876422	0.981606	0.998905	0.995201	99	100	98.6	102.3	1.37679e+08	1.0259e+08	9.11406e+07	1.03643e+08	1.17354e+08	8.71013e+07	1.02425e+08	9.01631e+07	1.022e+08	8.3589e+07	1.06049e+08	1.18593e+08	High	High	High	High	Peak Found	Peak Found
Master Protein	I1KTK7	Clustered mitochondria protein homolog OS=Glycine max OX=3847 GN=100816894 PE=3 SV=2	0	349.327	34	35	194	10	1442	157.2	6.37	456.5	35	8	25	1.338	1.841	0.704	0.985	1.207	0.766	0.956802	0.874284	0.924589	0.999987	0.899482	0.771308	84.3	102.6	91.8	121.3	2.43576e+07	2.89591e+07	2.95361e+07	3.52293e+07	3.55249e+07	2.76519e+07	2.91911e+07	4.02129e+07	3.15294e+07	5.53253e+07	3.26201e+07	4.16487e+07	High	High	High	High	High	High
Master Protein	I1NIY6	AA_TRNA_LIGASE_II domain-containing protein OS=Glycine max OX=3847 GN=100781350 PE=4 SV=1	0	349.146	67	27	302	7	447	51.4	6.43	932.54	27	20	0	0.826	0.656	1.668	1.107	1.043	1.122	0.74131	0.650846	0.277734	0.844883	0.99655	0.803561	119.9	85	107.5	87.7	1.6814e+07	1.64246e+07	2.13254e+07	1.19131e+07	1.33413e+07	1.05125e+07	1.50668e+07	1.36878e+07	1.62129e+07	1.22914e+07	1.63773e+07	8.83212e+06	High	High	High	High	High	High
Master Protein	I1KIV5	Uncharacterized protein OS=Glycine max OX=3847 GN=100799440 PE=4 SV=1	0	349.08	65	24	246	5	587	65.3	5.07	784.04	24	7	20	1	1.026	1.116	1.035	1.138	0.879	0.89681	0.937595	0.825662	0.967018	0.960026	0.973791	105.3	88.9	105.2	100.6	6.439e+07	3.96857e+07	4.16357e+07	4.47866e+07	3.51567e+07	2.5686e+07	4.70268e+07	4.15788e+07	3.73136e+07	8.44468e+07	3.97636e+07	3.86349e+07	High	High	High	High	High	High
Master Protein	I1KTX8	Phosphoglycerate kinase OS=Glycine max OX=3847 GN=100795933 PE=3 SV=1	0	348.51	63	22	536	2	485	50.2	8.13	1537.34	22	8	20	1.221	1.247	0.932	1.073	1.115	0.998	0.99762	0.999972	0.955983	0.906377	0.965028	0.975689	115.8	96.8	97.4	90	9.93076e+08	8.26487e+08	8.60938e+08	7.19796e+08	7.49731e+08	6.52207e+08	7.30238e+08	7.24131e+08	6.77322e+08	4.81766e+08	6.92105e+08	6.69032e+08	High	High	High	High	High	High
Master Protein	D6C4Z9	HSP90-1 OS=Glycine max OX=3847 GN=100194423 PE=2 SV=1	0	348.337	51	32	325	3	702	80.3	5.02	798.31	32	18	1	4.425	3.178	0.324	1.618	1.071	1.668	0.0206142	0.425646	0.105114	0.00256914	0.999952	0.0158691	40.7	105.5	129.3	124.5	5.08714e+06	3.86511e+06	3.16543e+06	8.49015e+06	1.00193e+07	1.17967e+07	9.71781e+06	1.22881e+07	1.99365e+07	4.96559e+06	1.18295e+07	1.74977e+07	High	High	High	High	High	High
Master Protein	K7MYQ2	Dolichyl-diphosphooligosaccharide--protein glycosyltransferase subunit 2 OS=Glycine max OX=3847 GN=100806815 PE=3 SV=1	0	348.186	50	20	226	9	688	74.7	5.92	759.24	20	19	0	1.231	1.168	0.767	0.96	0.966	1.047	0.997285	0.967593	0.986228	0.99582	0.962373	0.946649	106.6	96.1	114.6	82.7	1.95573e+07	2.55582e+07	2.79083e+07	3.55859e+07	2.30432e+07	2.29275e+07	2.33451e+07	3.43853e+07	2.74914e+07	3.1454e+07	1.98334e+07	1.87991e+07	High	High	High	High	High	High
Master Protein	I1L4D3	Uncharacterized protein OS=Glycine max OX=3847 GN=100781098 PE=4 SV=1	0	348.177	64	23	246	3	587	65.3	5.07	768.32	23	9	0	1.149	1.11	0.788	0.958	1.306	0.742	0.999218	0.974561	0.989669	0.994467	0.915525	0.803561	107.9	73.3	92.4	126.3	5.20772e+06	3.0039e+06	3.22531e+06	2.19135e+06	2.19874e+06	1.93125e+06	2.76202e+06	2.89826e+06	2.04349e+06	6.30624e+06	1.87777e+06	3.77291e+06	High	High	High	High	High	High
Master Protein	I1MU67	Uncharacterized protein OS=Glycine max OX=3847 GN=100805156 PE=4 SV=2	0	348.131	44	34	342	2	1134	124.8	7.08	795.94	34	17	0	0.706	0.868	1.185	0.901	1.019	0.944	0.732923	0.917702	0.868119	0.946694	0.99655	0.997603	115.1	100.9	90.2	93.7	1.01937e+06	3.53782e+06	4.70513e+06	3.54265e+06	3.10186e+06	2.77159e+06	2.46724e+06	3.23231e+06	2.77223e+06	1.49774e+06	2.89846e+06	2.88078e+06	High	High	High	High	High	Peak Found
Master Protein	I1K609	Uncharacterized protein OS=Glycine max OX=3847 GN=100787769 PE=3 SV=1	0	347.573	63	18	357	6	511	55.1	5.94	1031.47	18	5	0	1.304	0.789	0.878	1.173	0.674	1.316	0.980771	0.819826	0.990702	0.617104	0.217857	0.323564	95.4	106.3	134	64.3	1.11478e+07	1.45177e+07	1.22486e+07	1.33249e+07	1.46156e+07	1.36565e+07	1.82016e+07	1.4136e+07	1.72042e+07	8.26125e+06	1.51294e+07	4.93346e+06	High	High	High	High	High	High
Master Protein	A0A0R0KM06	Peroxidase OS=Glycine max OX=3847 GN=100775970 PE=3 SV=1	0	347.468	72	19	553	13	324	35.5	8.12	1275.65	19	3	5	0.695	0.797	0.955	0.65	0.778	0.838	0.366624	0.7533	0.94288	0.000869038	0.517999	0.928919	106	118.8	78.5	96.7	3.65447e+08	3.52566e+08	4.83447e+08	4.09546e+08	3.70239e+08	4.75052e+08	3.98005e+08	2.70733e+08	2.25244e+08	2.99212e+08	3.40579e+08	3.33443e+08	High	High	High	High	High	High
Master Protein	I1JQZ7	WD_REPEATS_REGION domain-containing protein OS=Glycine max OX=3847 GN=100777567 PE=4 SV=2	0	347.143	36	34	214	7	1352	145.1	7.21	536.81	34	3	27	0.967	0.979	1.006	0.956	1	0.943	0.868125	0.915777	0.908332	0.989478	0.974747	0.997603	116.2	96.7	94.9	92.2	6.08756e+07	7.08279e+07	7.09662e+07	7.25194e+07	5.74581e+07	5.89441e+07	5.72493e+07	7.03736e+07	5.78851e+07	7.81383e+07	5.61988e+07	5.06376e+07	High	High	Peak Found	High	High	High
Master Protein	I1KQ30	Aldedh domain-containing protein OS=Glycine max OX=3847 GN=100779993 PE=3 SV=1	0	346.995	70	28	430	7	505	54.8	6.04	999.07	28	8	0	1.019	0.952	0.952	0.996	0.842	1.243	0.908592	0.900632	0.943128	0.996239	0.749418	0.571962	116.7	102.8	100.7	79.8	7.38557e+07	7.01165e+07	6.22604e+07	7.16259e+07	6.18048e+07	6.00004e+07	5.76319e+07	6.0534e+07	8.34001e+07	4.79421e+07	4.79747e+07	6.69275e+07	High	High	High	High	High	High
Master Protein	Q39828	Dynamin-related protein 5A OS=Glycine max OX=3847 PE=2 SV=1	0	346.948	66	39	304	2	610	68.3	7.99	744.66	39	8	1	42.463	0.149	0.024	0.991	0.158	3.656	1.74058e-16	0.0129075	1.83145e-16	0.997086	2.32487e-16	7.38366e-13	4.3	197.6	197.7	0.4	4.90626e+06	5.23307e+06	4.17087e+06	1.66063e+08	2.22917e+08	2.95461e+08	2.90699e+08	1.76613e+08	2.23008e+08	579861	466262	76474.6	High	High	High	Peak Found	Not Found	Peak Found
Master Protein	I1LTA4	EF1Bgamma class glutathione S-transferase OS=Glycine max OX=3847 GN=EF1Bgamma2 PE=2 SV=1	0	346.816	67	23	413	9	418	47.4	6.02	1039.05	23	12	15	0.991	1.235	0.927	0.96	1.055	0.873	0.882299	0.999972	0.960472	0.992472	0.99934	0.968337	98.4	107.3	94.3	100	3.56194e+08	4.11323e+08	3.41224e+08	3.91792e+08	3.88199e+08	3.46348e+08	3.0038e+08	3.41121e+08	3.75437e+08	3.6204e+08	3.48955e+08	4.28367e+08	High	High	High	High	High	High
Master Protein	I1KCP1	Plasma membrane ATPase OS=Glycine max OX=3847 GN=100782459 PE=3 SV=1	0	346.276	36	29	310	1	956	105.2	6.84	811.99	29	6	0	1.55	2.194	0.721	1.109	1.314	0.706	0.941598	0.886571	0.986228	0.936953	0.927563	0.874976	62.4	104.1	96.6	136.9	294228	341177	464055	569610	607627	408343	528669	506466	673621		748702		Peak Found	Peak Found	Peak Found	Peak Found	Peak Found	Peak Found
Master Protein	K7L3L7	Importin subunit alpha OS=Glycine max OX=3847 GN=100813320 PE=3 SV=1	0	345.547	69	20	358	4	453	49.5	4.84	1068.62	20	7	0	0.419	0.361	2.3	1.01	1.282	0.809	0.162144	0.260557	0.113936	0.996239	0.925322	0.946232	193.2	77.7	68.4	60.7	5.48312e+06	3.79292e+06	4.74805e+06	2.23692e+06	1.9086e+06	1.10682e+06	1.25393e+06	1.68185e+06	2.35523e+06	925004	2.26717e+06	1.49218e+06	High	High	High	High	High	High
Master Protein	I1JMB4	Glyceraldehyde-3-phosphate dehydrogenase OS=Glycine max OX=3847 GN=GLYMA_03G092700 PE=3 SV=1	0	344.999	70	23	633	4	418	44.6	8.5	1270.43	23	3	20	1.12	1.167	0.843	0.955	0.916	1.067	0.972675	0.980187	0.999879	0.989478	0.915008	0.907505	112.2	105.4	99.9	82.5	3.26236e+08	3.5487e+08	3.46049e+08	3.32433e+08	3.24974e+08	3.16373e+08	2.59921e+08	3.07999e+08	3.29545e+08	2.57173e+08	2.54256e+08	2.53029e+08	High	High	High	High	High	High
Master Protein	I1JKC3	Malic enzyme OS=Glycine max OX=3847 GN=100811081 PE=3 SV=2	0	344.654	65	30	239	6	604	66.6	6.68	687.28	30	3	24	1.266	1.146	0.904	1.087	1.083	1.01	0.984855	0.972091	0.971257	0.826785	0.991287	0.964306	95.8	92.5	111.5	100.2	7.02091e+07	5.30744e+07	5.71064e+07	5.47394e+07	6.14887e+07	5.51356e+07	6.96757e+07	6.42921e+07	6.64458e+07	7.08346e+07	5.63513e+07	5.97451e+07	High	High	High	High	High	High
Master Protein	A0A0R0EXW6	AAA domain-containing protein OS=Glycine max OX=3847 GN=100776168 PE=3 SV=1	0	343.432	67	24	384	2	446	49.5	6.21	1050.78	24	19	24	1.288	1.408	0.848	1.07	1.272	0.862	0.97553	0.959797	0.998779	0.911194	0.796934	0.955533	102.1	86.3	99.7	112	1.65663e+08	1.79359e+08	1.71632e+08	1.1691e+08	1.88063e+08	1.45067e+08	1.67611e+08	1.289e+08	2.05241e+08	9.9394e+07	1.88425e+08	2.15951e+08	High	High	High	High	High	High
Master Protein	Q9M508	Beta-ketoacyl-ACP synthetase I OS=Glycine max OX=3847 GN=547575 PE=2 SV=1	0	343.372	58	18	209	3	469	49.7	7.49	907.62	18	8	0	0.719	0.391	1.228	0.897	0.658	1.262	0.422215	0.0739146	0.64352	0.861245	0.141495	0.520867	119	90.4	103.1	87.5	7.06844e+07	8.40227e+07	7.70463e+07	7.37582e+07	5.68722e+07	5.85508e+07	5.15126e+07	7.27387e+07	6.67897e+07	1.44053e+07	5.84021e+07	5.66506e+07	High	High	High	High	High	High
Master Protein	Q9M507	Beta-ketoacyl-ACP synthetase I-2 OS=Glycine max OX=3847 GN=548028 PE=2 SV=1	0	342.524	58	18	215	3	469	49.7	7.71	931.48	18	5	16	0.876	0.715	1.152	0.998	0.984	1.036	0.756464	0.628825	0.740306	0.996239	0.966228	0.939423	128.5	88.1	103.1	80.3	1.6239e+08	1.71922e+08	2.14299e+08	1.47338e+08	1.17891e+08	1.16734e+08	1.43211e+08	1.37986e+08	1.11402e+08	1.56048e+08	1.07429e+08	6.2906e+07	High	High	High	High	High	High
Master Protein	A0A0R0H183	Coatomer subunit alpha OS=Glycine max OX=3847 GN=100802600 PE=4 SV=1	0	342.432	42	37	229	2	1154	129	6.81	544.43	37	12	2	2.601	4.203	0.363	0.93	1.738	0.611	0.601381	0.56488	0.489541	0.967129	0.490766	0.406096	30.5	102.9	93.1	173.4	741477	594925	522639	2.00508e+06	2.20897e+06	1.94583e+06	1.83854e+06	1.78097e+06	1.81416e+06	4.72578e+06	1.56778e+06	3.37888e+06	Peak Found	High	High	High	High	Peak Found
Master Protein	I1MJX0	Acetyltransferase component of pyruvate dehydrogenase complex OS=Glycine max OX=3847 GN=100778218 PE=3 SV=1	0	342.042	52	24	490	9	547	59.6	7.69	1353.63	24	16	16	1.976	2.052	0.576	0.938	1.007	0.905	0.469612	0.684135	0.643054	0.967129	0.983775	0.983378	91	106.3	95.5	107.3	3.00585e+08	2.96869e+08	3.27463e+08	3.18673e+08	3.50987e+08	3.69015e+08	3.07325e+08	3.24601e+08	3.15443e+08	3.62909e+08	3.10398e+08	3.54345e+08	High	High	High	High	High	High
Master Protein	I1JV39	Glucose-6-phosphate isomerase OS=Glycine max OX=3847 GN=100791285 PE=3 SV=1	0	341.687	64	35	335	7	615	67.3	5.94	789.34	35	4	28	1.289	1.188	0.789	1.073	0.941	1.178	0.975481	0.986362	0.983132	0.903651	0.937687	0.690243	100.4	109	104.4	86.2	1.14994e+08	1.08036e+08	1.02604e+08	1.24142e+08	1.1727e+08	8.97852e+07	1.27717e+08	1.08567e+08	1.12349e+08	9.27697e+07	9.24757e+07	1.01431e+08	High	High	High	High	High	High
Master Protein	K7LSI5	tRNA-binding domain-containing protein OS=Glycine max OX=3847 GN=100809861 PE=3 SV=1	0	341.416	53	33	284	33	803	90.4	6.76	767.35	33	12	0	2.188	2.757	0.49	0.989	1.281	0.778	0.307937	0.385159	0.3716	0.997086	0.782776	0.794467	72	95.5	102.9	129.7	7.04404e+07	6.76344e+07	6.53454e+07	8.97315e+07	9.61431e+07	8.95405e+07	9.66557e+07	1.02168e+08	8.91224e+07	1.09361e+08	1.21858e+08	1.24897e+08	High	High	High	High	High	High
Master Protein	I1K3R3	Uncharacterized protein OS=Glycine max OX=3847 GN=100812202 PE=4 SV=1	0	341.126	49	32	236	3	916	100.4	7.36	577.71	32	5	0	2.003	2.049	0.588	1.052	1.4	0.811	0.80757	0.888164	0.891988	0.981606	0.858381	0.956645	58.3	99.2	109.9	132.6	1.17972e+06	767731	854794	1.67319e+06	1.45555e+06	1.40261e+06	1.72243e+06	1.6127e+06	1.60424e+06	1.94434e+06	1.54759e+06	2.3271e+06	High	High	High	High	High	High
Master Protein	I1MBI6	Uncharacterized protein OS=Glycine max OX=3847 GN=100810630 PE=4 SV=1	0	340.085	44	36	223	12	996	109.8	6.19	570.41	36	14	0	0.959	0.852	1.069	1.015	1.002	1.013	0.894924	0.863711	0.896235	0.993607	0.976628	0.950944	103	104	92.9	100	1.41496e+07	9.67731e+06	9.02238e+06	1.0785e+07	9.76768e+06	7.62495e+06	7.89565e+06	8.72727e+06	1.15724e+07	7.35371e+06	9.3941e+06	9.82537e+06	High	High	High	High	High	High
Master Protein	I1KM30	LRRNT_2 domain-containing protein OS=Glycine max OX=3847 GN=100781948 PE=4 SV=1	0	340.019	57	22	558	18	449	49.8	8.79	1677.72	22	7	4	1.001	0.92	0.964	1.055	0.758	1.612	0.890961	0.882196	0.934586	0.93802	0.451713	0.0297306	117.2	105.5	110	67.3	1.15707e+09	1.05359e+09	1.30113e+09	1.08818e+09	8.23957e+08	1.04089e+09	1.08563e+09	1.02627e+09	1.13182e+09	7.12795e+08	6.6412e+08	6.64509e+08	High	High	High	High	High	High
Master Protein	K7K2V9	MI domain-containing protein OS=Glycine max OX=3847 GN=100790680 PE=4 SV=1	0	339.981	31	37	243	13	1822	196.5	7.36	511.37	37	1	0	2.218	3.028	0.413	0.92	1.176	0.798	0.541996	0.448598	0.317559	0.953636	0.949036	0.903719	63.8	118.3	99.4	118.5	5.7534e+06	5.79466e+06	3.48507e+06	8.36206e+06	1.10277e+07	1.06693e+07	9.2065e+06	8.44034e+06	8.96606e+06	8.44337e+06	1.06862e+07	1.22829e+07	High	High	High	High	High	High
Master Protein	I1MRK1	Uncharacterized protein OS=Glycine max OX=3847 GN=GLYMA_17G027700 PE=4 SV=1	0	339.512	56	29	288	4	723	78.7	9.04	785.6	29	17	0	0.916	0.813	1.171	0.983	0.956	1.127	0.868968	0.840159	0.814697	0.997495	0.949716	0.801333	73.8	104.8	121.5	99.9	1.88943e+07	1.17617e+07	9.7784e+06	1.55954e+07	1.7218e+07	1.67112e+07	2.51942e+07	1.63564e+07	1.93757e+07	3.30029e+06	1.5924e+07	2.10582e+07	High	High	High	High	High	High
Master Protein	A0A0R4J5N3	Uncharacterized protein OS=Glycine max OX=3847 GN=GLYMA_17G053200 PE=3 SV=1	0	339.448	76	27	653	2	413	46.8	5.68	1591.03	27	17	3	1.183	1.838	0.744	1.03	1.403	0.735	0.996641	0.886571	0.955983	0.987496	0.629682	0.73258	84	90.8	87.8	137.4	1.02308e+07	8.31919e+06	6.0756e+06	8.98366e+06	9.49539e+06	7.38257e+06	8.6906e+06	7.39165e+06	8.7672e+06	1.60208e+07	8.69445e+06	1.36038e+07	High	High	High	High	High	High
Master Protein	I1LHW6	Peroxidase OS=Glycine max OX=3847 GN=102667724 PE=3 SV=1	0	339.344	65	18	711	16	331	36.3	8.87	1875.95	18	11	3	1.259	0.999	0.712	0.865	0.745	1.108	0.987475	0.924487	0.913278	0.728455	0.396977	0.834351	101.2	113.8	99.4	85.7	1.14153e+09	1.20269e+09	1.55276e+09	1.3521e+09	1.256e+09	1.57507e+09	1.18072e+09	1.35037e+09	1.12052e+09	8.11075e+08	1.04693e+09	1.01798e+09	High	High	High	High	High	High
Master Protein	I1MQD0	T-complex protein 1 subunit gamma OS=Glycine max OX=3847 GN=100802143 PE=3 SV=1	0	339.188	63	33	361	4	554	60.2	6.18	779.45	33	16	1	0.764	0.748	1.301	0.9	0.958	0.98	0.690365	0.765496	0.670272	0.922978	0.952642	0.982511	106.2	100.8	96.8	96.3	1.81846e+07	1.43874e+07	1.35568e+07	1.52178e+07	1.36568e+07	9.25871e+06	9.7912e+06	1.3113e+07	1.33391e+07	1.32846e+07	1.30555e+07	1.23443e+07	High	High	High	High	High	High
Master Protein	I1M2X3	Protein kinase domain-containing protein OS=Glycine max OX=3847 GN=GLYMA_13G266100 PE=4 SV=1	0	339.111	49	39	255	36	999	110	5.71	602.35	39	13	3	1.904	2.74	0.55	1.027	1.327	0.768	0.595091	0.461728	0.621658	0.973743	0.762187	0.776718	74.9	96.3	105.5	123.4	2.32245e+07	3.20238e+07	4.07769e+07	4.11882e+07	3.19199e+07	5.85231e+07	5.33547e+07	3.8037e+07	4.51278e+07	8.35324e+07	4.26836e+07	5.27691e+07	High	High	High	High	High	High
Master Protein	I1LKW7	Epimerase domain-containing protein OS=Glycine max OX=3847 GN=100811095 PE=4 SV=1	0	338.877	83	26	275	7	387	43.2	6.2	718.95	26	11	20	1.153	1.141	0.731	0.963	0.82	1.127	0.984855	0.972743	0.934586	0.994897	0.671381	0.802485	109.6	102.1	106.6	81.6	1.70303e+08	1.33978e+08	1.19938e+08	1.24808e+08	1.28558e+08	1.23038e+08	1.34316e+08	9.96549e+07	1.30296e+08	8.50049e+07	9.97002e+07	1.33272e+08	High	High	High	High	High	High
Master Protein	I1L4W3	Uncharacterized protein OS=Glycine max OX=3847 GN=GLYMA_09G203500 PE=3 SV=1	0	338.857	61	26	279	3	661	73.1	7.49	740.14	26	9	2	1.795	2.174	0.575	0.842	1.38	0.584	0.869149	0.821137	0.829349	0.757844	0.792469	0.312389	61.7	136.5	44	157.8	2.12578e+06	1.56779e+06	1.56206e+06	2.41682e+06	3.46839e+06	3.65488e+06	836029	3.04201e+06	1.11896e+06	4.95784e+06	4.01165e+06	3.87938e+06	High	High	High	High	High	Peak Found
Master Protein	P26413	Heat shock 70 kDa protein OS=Glycine max OX=3847 GN=HSP70 PE=3 SV=1	0	338.806	55	26	445	2	645	70.8	5.49	1157.29	26	17	0	1.334	3.888	0.934	1.061	3.039	0.966	0.96288	0.0669537	0.966709	0.9195	3.93227e-07	0.984469	28.8	41.2	38.7	291.3	3.35074e+07	3.49496e+07	3.59305e+07	3.55894e+07	5.41507e+07	5.00063e+07	3.51456e+08	3.19469e+07	4.69137e+07	3.70219e+08	2.6192e+08	3.53241e+08	High	High	High	High	High	Peak Found
Master Protein	I1K089	Malate synthase OS=Glycine max OX=3847 GN=100782820 PE=3 SV=1	0	338.256	69	32	254	12	556	62.7	6.29	695.8	32	5	20	1.131	1.293	0.899	1.045	1.019	1.026	0.975167	0.993489	0.979243	0.954829	0.991287	0.935759	101.8	106.2	99.3	92.7	9.19268e+07	8.19714e+07	6.9483e+07	8.54899e+07	8.91291e+07	7.52627e+07	7.99697e+07	7.43316e+07	9.7145e+07	6.6213e+07	7.70586e+07	7.46726e+07	High	High	High	High	High	High
Master Protein	I1KZJ9	Uncharacterized protein OS=Glycine max OX=3847 GN=100810476 PE=4 SV=1	0	338.109	52	34	375	34	725	81	7.39	1035.58	34	8	0	1.379	1.586	0.916	1.033	1.117	0.903	0.937614	0.912656	0.967945	0.967129	0.9649	0.983378	103.8	96.4	98.7	101.2	2.12437e+08	1.96e+08	1.90646e+08	1.82068e+08	1.83223e+08	1.62754e+08	1.84642e+08	1.99678e+08	1.86376e+08	2.05775e+08	1.91138e+08	1.88169e+08	High	High	High	High	High	High
Master Protein	I1LU76	Peroxidase OS=Glycine max OX=3847 GN=100803114 PE=3 SV=1	0	337.981	68	21	1277	5	326	35.8	8.22	3124.22	21	12	18	0.853	0.604	1.04	0.916	0.688	1.401	0.714642	0.407473	0.876658	0.929494	0.205169	0.197323	132.6	104.3	95.5	67.7	2.66096e+09	2.96531e+09	3.3746e+09	2.65339e+09	2.04095e+09	2.33263e+09	2.05054e+09	2.17125e+09	2.13604e+09	1.30031e+09	1.64049e+09	1.51358e+09	High	High	High	High	High	High
Master Protein	I1KSL6	Uncharacterized protein OS=Glycine max OX=3847 GN=100818130 PE=3 SV=1	0	337.931	64	26	300	2	545	59.1	6.35	662.95	26	8	0	0.563	0.666	1.355	0.758	0.816	0.899	0.495706	0.793621	0.780454	0.358758	0.83041	0.984469	113.4	116.7	82.6	87.3	3.06434e+06	1.96986e+06	1.08119e+06	2.17786e+06	2.02616e+06	1.6633e+06	1.30712e+06	1.54981e+06	1.4346e+06	1.51598e+06	1.61787e+06	1.20732e+06	High	High	High	High	High	High
Master Protein	I1K5J8	Uncharacterized protein OS=Glycine max OX=3847 GN=100795694 PE=3 SV=1	0	337.748	57	25	299	3	617	69.3	7.87	865.87	25	5	0	1.044	1.048	0.869	0.971	1.086	0.95	0.94565	0.959797	0.998779	0.996018	0.991287	0.989404	92.9	104.9	100.9	101.2	1.04627e+07	8.2484e+06	7.47968e+06	9.31984e+06	1.08709e+07	8.89692e+06	8.96423e+06	8.25708e+06	9.09296e+06	6.25228e+06	9.65324e+06	8.98887e+06	High	High	High	High	High	High
Master Protein	Q9SDZ0	Isoflavone reductase homolog 2 OS=Glycine max OX=3847 GN=IFR2 PE=2 SV=1	0	337.478	84	20	639	18	310	33.9	5.88	1650.9	20	4	2	1.584	1.42	0.664	0.965	0.894	1.09	0.82189	0.954831	0.852725	0.99582	0.875413	0.867241	69.9	103.6	112.4	114.1	3.6448e+08	3.27835e+08	3.10217e+08	4.86029e+08	4.69357e+08	5.42091e+08	5.54076e+08	5.27457e+08	5.00742e+08	4.31956e+08	7.177e+08	5.35237e+08	High	High	High	High	High	High
Master Protein	A0A368UHG1	Uncharacterized protein OS=Glycine max OX=3847 GN=GLYMA_13G336200 PE=3 SV=1	0	337.051	83	18	985	3	227	24.6	6.55	2541.36	18		0	1.508	1.652	0.648	1.127	0.908	1.152	0.868968	0.903424	0.836818	0.702268	0.905353	0.724568	52.2	107.3	135.6	104.9	4.02618e+07	5.63185e+07	3.76015e+07	8.2802e+07	7.81417e+07	8.71513e+07	1.04626e+08	5.7826e+07	1.09589e+08	9.23732e+07	6.38654e+07	8.0888e+07	High	High	High	High	High	High
Master Protein	I1JXH8	Uncharacterized protein OS=Glycine max OX=3847 GN=100776903 PE=3 SV=1	0	336.115	76	24	291	7	487	53.2	6.7	908.5	24	4	0	1.078	0.966	0.904	0.925	0.964	1.025	0.964664	0.911926	0.986228	0.967018	0.957982	0.933826	132.9	91	95.4	80.7	8.74798e+06	1.31216e+07	1.30736e+07	7.69674e+06	1.05346e+07	8.94949e+06	1.2648e+07	9.38055e+06	7.66975e+06	7.93746e+06	9.3353e+06	6.89083e+06	High	High	High	High	High	High
Master Protein	A0A0R0GWL6	Peroxidase OS=Glycine max OX=3847 GN=102660930 PE=3 SV=1	0	336.114	66	18	1262	2	326	35.6	8.07	3408.79	18	13	1	0.78	0.532	1.306	0.905	0.631	1.474	0.567473	0.268977	0.524175	0.906675	0.0762128	0.108792	151.2	89.5	93.4	65.9	4.54677e+08	5.75691e+08	7.23559e+08	4.75747e+08	2.1564e+08	3.40798e+08	3.38029e+08	3.55804e+08	3.84675e+08	2.73218e+08	2.51029e+08	1.83197e+08	High	High	High	High	High	High
Master Protein	I1MMH6	Pectin acetylesterase OS=Glycine max OX=3847 GN=100781246 PE=3 SV=1	0	334.929	64	20	410	20	399	44	8.32	1018.18	20	16	0	1.166	0.837	0.913	1.087	0.697	1.502	0.991026	0.805071	0.969916	0.848296	0.232027	0.0832788	115.2	102.1	110.2	72.5	2.44423e+08	2.67375e+08	2.34404e+08	2.1661e+08	1.92458e+08	2.54735e+08	2.2734e+08	2.33945e+08	2.43954e+08	1.12765e+08	1.70483e+08	1.53874e+08	High	High	High	High	High	High
Master Protein	A0A0R4J4Z2	Uncharacterized protein OS=Glycine max OX=3847 GN=GLYMA_13G106200 PE=3 SV=1	0	334.712	76	26	648	1	413	46.7	5.68	1575.58	26	13	0	0.82	0.633	0.966	0.792	0.612	1.273	0.86974	0.825483	0.97559	0.726307	0.425762	0.784208	114.7	118.7	94	72.6	824375	1.37657e+06	1.10712e+06	1.14592e+06	1.22955e+06	1.02542e+06	907418	864186	916142	716369		686215	Peak Found	High	Peak Found	High	High	High
Master Protein	I1NJ61	CPSF_A domain-containing protein OS=Glycine max OX=3847 GN=100800457 PE=4 SV=1	0	334.667	37	33	192	3	1214	135	5.59	456.19	33	20	30	1.737	2.263	0.598	1.091	1.352	0.802	0.717356	0.700672	0.745931	0.840277	0.640438	0.849059	68.2	100.4	104.1	127.3	1.92734e+07	2.75407e+07	2.45927e+07	4.04446e+07	3.61798e+07	3.11869e+07	3.52123e+07	4.64849e+07	3.75256e+07	6.77527e+07	3.4439e+07	4.58745e+07	Peak Found	Peak Found	High	High	Peak Found	Peak Found
Master Protein	I1MJE2	Uncharacterized protein OS=Glycine max OX=3847 GN=100806731 PE=4 SV=1	0	334.611	59	22	298	22	548	60	6.19	892.47	22	15	0	1.166	1.045	0.781	0.927	0.759	1.205	0.991026	0.940274	0.976907	0.953616	0.451713	0.619729	104.7	108.4	100.6	86.4	1.34684e+08	1.51929e+08	1.76924e+08	1.57302e+08	1.35421e+08	2.62562e+08	1.95229e+08	1.46034e+08	1.41772e+08	1.57675e+08	1.25436e+08	1.02373e+08	High	High	High	High	High	High
Master Protein	Q76LA6	Cytosolic ascorbate peroxidase 2 OS=Glycine max OX=3847 GN=apx2 PE=2 SV=1	0	334.499	84	17	867	17	250	27.1	5.99	2317.44	17	12	0	1.035	1.05	0.869	0.973	0.92	1.073	0.920441	0.942471	0.990068	0.996239	0.91688	0.89555	101.7	95.6	101.3	101.4	9.75069e+08	1.0382e+09	1.01877e+09	7.66383e+08	1.21542e+09	9.58527e+08	1.01533e+09	7.51112e+08	1.13243e+09	6.2112e+08	1.01589e+09	1.09175e+09	High	High	High	High	High	High
Master Protein	I1KH71	Acetyltransferase component of pyruvate dehydrogenase complex OS=Glycine max OX=3847 GN=100804938 PE=3 SV=1	0	334.178	54	24	450	9	547	59.4	7.91	1228.65	24	7	0	1.153	1.515	0.796	0.885	0.985	0.951	0.985619	0.94505	0.986228	0.820135	0.963982	0.996019	96.9	104.9	93.4	104.8	4.24579e+07	4.62071e+07	4.64089e+07	4.45427e+07	4.99917e+07	5.21569e+07	4.45362e+07	4.79322e+07	4.41339e+07	5.42479e+07	4.52079e+07	4.99796e+07	High	High	High	High	High	High
Master Protein	I1LN41	Protein transport protein SEC23 OS=Glycine max OX=3847 GN=100789860 PE=3 SV=1	0	333.544	54	25	236	6	767	84.5	6.3	643.08	25	11	0	1.869	2.498	0.625	1.09	1.381	0.797	0.750873	0.709393	0.838374	0.906675	0.735566	0.871557	50.4	101.6	112.5	135.5	3.14768e+06	5.31148e+06	3.52242e+06	7.3658e+06	7.10569e+06	6.66742e+06	8.83694e+06	6.38992e+06	7.86942e+06	1.14971e+07	5.9593e+06	9.4745e+06	High	High	High	High	High	High
Master Protein	I1KNH4	Pyrophosphate--fructose 6-phosphate 1-phosphotransferase subunit beta OS=Glycine max OX=3847 GN=100782857 PE=3 SV=1	0	333.365	64	28	322	9	568	62.1	6.71	824.89	28	7	7	1.235	1.046	0.877	1.055	0.955	1.161	0.99711	0.941263	0.986228	0.92792	0.94553	0.766761	112	92.1	106.4	89.4	6.41854e+07	8.20437e+07	5.45702e+07	6.84725e+07	5.18532e+07	5.27925e+07	6.35306e+07	6.09416e+07	5.71956e+07	4.10904e+07	5.68964e+07	5.12432e+07	High	High	High	High	High	High
Master Protein	I1K937	Plasma membrane ATPase OS=Glycine max OX=3847 GN=547525 PE=3 SV=1	0	333.253	30	24	289	3	951	104.4	7.06	747.68	24	6	0	1.068	1.094		0.953	1.785	0.771	0.97319	0.970352		0.993579	0.514104	0.93017	76.1	96.4	153.7	73.8	451137	598119	678443	757455	876183	295750	1.20821e+06	1.40741e+06	890044	580274	252218	1.69077e+06	Peak Found	Peak Found	Peak Found	Peak Found	Peak Found	High
Master Protein	A0A368UGN4	Uncharacterized protein OS=Glycine max OX=3847 GN=GLYMA_18G250100 PE=3 SV=1	0	333.179	44	23	396	18	802	86	9.14	1088.63	23		6	1.715	1.701	0.579	0.885	0.961	0.908	0.70994	0.872471	0.652083	0.820094	0.955777	0.983378	89	117	103.6	90.4	2.03762e+08	1.53798e+08	2.15324e+08	2.67824e+08	2.42013e+08	2.91601e+08	1.77347e+08	3.13738e+08	2.37351e+08	1.5344e+08	2.85156e+08	2.07054e+08	High	High	High	High	High	High
Master Protein	I1N5E4	Uncharacterized protein OS=Glycine max OX=3847 GN=100816075 PE=3 SV=1	0	332.903	62	21	384	1	439	48	6.57	1315.8	21	18	0	1.764	2.241	0.54	1.06	1.149	0.918	0.798934	0.791037	0.691457	0.938915	0.957982	0.997906	61.2	113.2	108	117.6	11313414	8.37713e+06	6.30028e+06	1.36908e+07	1.59519e+07	1.55021e+07	1.4779e+07	1.45117e+07	1.77927e+07	1.57367e+07	1.6098e+07	2.53502e+07	High	High	High	High	High	High
Master Protein	I1LYN0	Succinate--CoA ligase [ADP-forming] subunit beta, mitochondrial OS=Glycine max OX=3847 GN=100790952 PE=3 SV=1	0	332.849	63	21	414	5	422	45.3	6.16	1008.2	21	13	0	1.088	1.141	0.865	0.951	0.967	0.979	0.954717	0.969656	0.990932	0.985104	0.957982	0.982511	104.3	99.5	99.2	96.9	7.24835e+07	6.20288e+07	6.89073e+07	6.43609e+07	7.22936e+07	6.57592e+07	5.60152e+07	7.02255e+07	6.55735e+07	6.67897e+07	6.40532e+07	5.44335e+07	High	High	High	High	High	High
Master Protein	A0A0R0FFH5	Glucose-6-phosphate 1-dehydrogenase OS=Glycine max OX=3847 GN=100815891 PE=3 SV=1	0	332.475	68	33	335	6	536	60.8	7.06	721.43	33	18	27	2.347	3.528	0.434	0.984	1.279	0.686	0.212766	0.11351	0.171998	0.999892	0.784615	0.423137	68.7	104.6	97.3	129.4	1.06686e+08	1.06922e+08	1.03453e+08	1.41346e+08	1.77512e+08	1.62377e+08	1.15286e+08	1.51102e+08	1.59027e+08	2.01023e+08	1.88803e+08	2.01469e+08	High	High	High	High	High	High
Master Protein	A0A0R0LI21	Uncharacterized protein OS=Glycine max OX=3847 GN=GLYMA_01G208600 PE=4 SV=1	0	332.209	27	37	196	19	2164	232.4	5.64	486.03	37	1	0	1.819	2.185	0.518	1.024	1.121	0.941	0.791605	0.806494	0.63178	0.991307	0.977908	0.997603	66.6	102.7	114.7	115.9	8.63021e+06	7.12761e+06	7.04374e+06	8.51209e+06	1.09896e+07	1.22447e+07	1.47994e+07	9.86287e+06	1.22708e+07	1.15214e+07	1.23977e+07	1.39429e+07	High	High	High	High	High	High
Master Protein	I1LQD7	PfkB domain-containing protein OS=Glycine max OX=3847 GN=100812560 PE=3 SV=1	0	332.185	72	17	608	4	330	35.4	5.26	1792.11	17	12	0	2.25	3.109	0.398	0.9	1.251	0.832	0.504342	0.511778	0.293032	0.92792	0.903481	0.935549	53.6	105.8	113.1	127.5	3.88941e+06	3.4077e+06	3.25095e+06	6.73197e+06	6.68871e+06	9.32673e+06	7.84434e+06	6.42029e+06	7.19788e+06	7.59728e+06	8.11067e+06	1.04015e+07	High	High	High	High	High	High
Master Protein	I1K1T0	WD_REPEATS_REGION domain-containing protein OS=Glycine max OX=3847 GN=100805443 PE=4 SV=2	0	331.42	36	39	184	8	1622	176.1	8.15	378.91	39	5	31	1.965	2.22	0.551	1.098	1.297	0.791	0.573391	0.742956	0.643276	0.833175	0.741972	0.828562	71.4	91.8	99.5	137.2	1.72921e+07	2.54521e+07	2.36932e+07	3.39441e+07	3.02963e+07	3.04749e+07	2.9091e+07	4.36319e+07	3.30279e+07	4.63684e+07	2.92428e+07	4.55341e+07	High	High	High	High	High	High
Master Protein	I1MBL5	Uncharacterized protein OS=Glycine max OX=3847 GN=100818985 PE=3 SV=1	0	331.326	67	29	352	5	505	57.9	8.75	918.63	29	14	0	2.716	6.271	0.278	0.807	1.45	0.551	0.321293	0.0909784	0.0654726	0.658538	0.636215	0.176408	42.2	116.9	86.4	154.6	1.70235e+06	1.87006e+06	1.62184e+06	4.6614e+06	4.89301e+06	4.71895e+06	3.20972e+06	3.48781e+06	3.98068e+06	8.85225e+06	4.6264e+06	6.23981e+06	High	High	High	High	High	High
Master Protein	A0A0R0EGZ2	USP domain-containing protein (Fragment) OS=Glycine max OX=3847 GN=GLYMA_20G054600 PE=4 SV=1	0	331.033	50	37	265	2	749	88.7	5.83	637.01	37	20	11	1.284	1.429	0.761	0.982	1.06	0.906	0.983748	0.980782	0.986228	0.999892	0.998905	0.983378	98.4	105.7	97.3	98.6	2.02992e+07	2.61082e+07	2.25949e+07	2.89732e+07	2.42719e+07	1.71937e+07	1.54765e+07	2.23379e+07	2.72208e+07	3.54104e+07	2.26491e+07	1.58389e+07	Peak Found	Peak Found	Peak Found	High	High	High
Master Protein	I1JPD4	Eukaryotic translation initiation factor 3 subunit A OS=Glycine max OX=3847 GN=100803796 PE=3 SV=1	0	330.394	42	33	241	6	958	111.9	9.29	613.57	33	3	27	1.634	1.985	0.696	1.086	1.41	0.796	0.783228	0.761726	0.895859	0.85306	0.509793	0.846031	102.7	98.6	98.7	100	9.53323e+07	9.54115e+07	8.47556e+07	9.15282e+07	9.16977e+07	7.09547e+07	6.98176e+07	1.10386e+08	9.16185e+07	1.04049e+08	9.28243e+07	8.02564e+07	High	High	High	High	High	High
Master Protein	Q42806	Pyruvate kinase, cytosolic isozyme OS=Glycine max OX=3847 PE=2 SV=1	0	330.383	65	24	330	5	511	55.3	7.56	977.61	24	5	0	1.579	0.843	0.542	1.047	0.568	1.8	0.87391	0.863711	0.690095	0.950093	0.02479	0.00540229	88.4	117.8	122.2	71.6	1.50659e+07	1.31132e+07	1.01837e+07	1.74605e+07	1.79774e+07	1.42038e+07	2.1515e+07	1.27057e+07	1.81193e+07	6.71714e+06	1.06185e+07	1.32158e+07	High	High	High	High	High	High
Master Protein	I1JZP0	Uncharacterized protein OS=Glycine max OX=3847 GN=100783173 PE=4 SV=1	0	330.141	66	16	343	9	413	43.6	6.92	1038.69	16	5	0	0.921	0.591	1.216	1.077	0.716	1.489	0.820021	0.387677	0.6536	0.870642	0.316197	0.152052	123	95.4	117	64.6	7.62712e+07	7.78708e+07	7.72368e+07	6.29878e+07	5.98908e+07	5.47994e+07	7.53537e+07	5.7077e+07	7.35043e+07	4.86196e+07	3.8599e+07	4.06045e+07	High	High	High	High	High	High
Master Protein	A0A0R0F259	Uncharacterized protein OS=Glycine max OX=3847 GN=100782747 PE=3 SV=1	0	330.024	48	19	222	4	608	65.2	6.21	807.83	19	18	0	2.425	4.896	0.404	0.969	1.338	0.646	0.53372	0.199733	0.519765	0.996239	0.791551	0.429756	27.3	59.8	63	249.9	1.1444e+06	5.20496e+06	893365	2.50602e+06	3.32795e+06	2.49785e+06	2.05608e+07	2.27063e+06	2.63795e+06	2.3419e+07	9.11258e+06	1.04683e+07	High	High	High	High	High	High
Master Protein	I1JP95	S-(hydroxymethyl)glutathione dehydrogenase OS=Glycine max OX=3847 GN=GLYMA_03G168700 PE=3 SV=1	0	329.944	86	19	345	19	379	40.3	6.76	1063.44	19	3	0	1.1	1.068	0.94	0.998	1.032	0.953	0.96286	0.948467	0.95055	0.996239	0.996877	0.995692	114.2	98.8	97.8	89.2	2.17983e+08	2.01649e+08	2.17592e+08	2.20628e+08	1.77876e+08	1.88142e+08	1.75505e+08	2.1447e+08	1.86246e+08	2.22009e+08	1.69937e+08	1.55758e+08	High	High	High	High	High	High
Master Protein	I1N5N0	Pyruvate kinase OS=Glycine max OX=3847 GN=100037452 PE=3 SV=1	0	329.917	69	27	325	8	510	55.2	7.56	944.85	27	19	17	1.054	0.762	0.965	1.035	0.754	1.462	0.935994	0.699434	0.934305	0.967018	0.433452	0.120863	129	102.6	101.9	66.5	1.99822e+08	1.99611e+08	1.74085e+08	1.74839e+08	1.58838e+08	1.30747e+08	2.0422e+08	1.46065e+08	1.57787e+08	9.21997e+07	1.02866e+08	1.1098e+08	High	High	High	High	High	High
Master Protein	I1K467	Uncharacterized protein OS=Glycine max OX=3847 GN=100805255 PE=3 SV=1	0	329.796	64	26	300	2	545	59	6.51	679.07	26	5	26	0.919	1.141	0.903	0.968	1.209	0.785	0.818087	0.966408	0.976907	0.996018	0.899977	0.840054	103.6	99.7	85.3	111.4	1.37871e+08	8.175e+07	7.70827e+07	8.98797e+07	7.86846e+07	6.31808e+07	6.73565e+07	6.3786e+07	8.24126e+07	1.18796e+08	7.19906e+07	8.7899e+07	High	High	High	High	High	High
Master Protein	I1KU18	Uncharacterized protein OS=Glycine max OX=3847 GN=100808508 PE=4 SV=1	0	329.771	88	20	391	20	328	35.7	5.99	950.19	20	8	0	4.409	5.508	0.567	2.073	1.949	0.988	0.000487709	0.00569285	0.621214	7.4481e-12	0.0142312	0.982511	58.1	73.9	125.9	142.1	2.28035e+08	2.03612e+08	2.55302e+08	2.55976e+08	2.90291e+08	2.91347e+08	4.92725e+08	7.00221e+08	4.9435e+08	6.31313e+08	4.90433e+08	5.57798e+08	High	High	High	High	High	High
Master Protein	I1L8G3	Succinate--CoA ligase [ADP-forming] subunit beta, mitochondrial OS=Glycine max OX=3847 GN=GLYMA_10G039000 PE=3 SV=1	0	329.502	63	21	413	5	422	45.3	6.23	1001.18	21	10	22	1.434	1.508	0.801	1.048	1.115	0.961	0.907993	0.934359	0.986228	0.947549	0.965028	0.987957	80.7	99	101.7	118.6	3.31594e+08	2.69202e+08	2.89564e+08	3.29375e+08	3.63498e+08	3.55075e+08	3.79798e+08	3.64636e+08	3.39474e+08	4.25549e+08	3.54189e+08	4.36298e+08	High	High	High	High	High	High
Master Protein	I1LIJ6	Uncharacterized protein OS=Glycine max OX=3847 GN=GLYMA_11G093200 PE=4 SV=1	0	329.268	52	29	387	10	687	77.2	9.16	953.49	29	11	20	1.84	2.277	0.575	1	1.148	0.864	0.595581	0.55776	0.642844	0.996018	0.950276	0.956645	65.7	98.5	102.9	132.9	1.52283e+08	1.31068e+08	1.00891e+08	1.74765e+08	2.21766e+08	1.96474e+08	2.28011e+08	1.80248e+08	2.05071e+08	2.32108e+08	2.6493e+08	2.98584e+08	High	High	High	High	High	High
Master Protein	I1JQS1	Peptidase_S9 domain-containing protein OS=Glycine max OX=3847 GN=GLYMA_03G219500 PE=4 SV=1	0	329.153	49	27	193	13	954	106.1	6.2	518.09	27	3	14	1.427	1.287	0.81	1.067	1.07	1.03	0.917628	0.999377	0.998779	0.92792	0.991287	0.957018	89.3	95.9	115.6	99.2	2.75332e+07	2.84759e+07	2.49048e+07	3.06868e+07	2.72508e+07	2.95876e+07	3.65073e+07	3.56514e+07	3.0431e+07	3.74799e+07	3.06155e+07	2.4001e+07	High	High	High	High	High	High
Master Protein	I1KDM8	Malate dehydrogenase OS=Glycine max OX=3847 GN=GLYMA_06G231500 PE=3 SV=1	0	329.153	71	14	325	3	345	36	8.1	1232.84	14	6	0	1.387	1.036	0.909	1.224	0.907	1.166	0.947901	0.928589	0.966709	0.375217	0.902653	0.719311	77.1	75.3	88.7	158.9	1.45788e+07	2.18867e+07	1.89672e+07	1.90062e+07	1.85136e+07	1.71207e+07	4.71555e+07	2.18261e+07	1.80014e+07	4.30227e+07	3.90914e+07	6.97333e+06	High	High	High	High	High	High
Master Protein	A0A0R4J3M4	Uncharacterized protein OS=Glycine max OX=3847 GN=100789053 PE=3 SV=1	0	328.997	49	20	268	5	607	65.1	6.27	912.28	20	7	15	1.625	1.099	0.672	1.083	0.83	1.319	0.791605	0.959958	0.883173	0.841972	0.730959	0.399847	108	102.8	108.7	80.5	5.42475e+07	5.19189e+07	5.2115e+07	7.18118e+07	4.96062e+07	4.31538e+07	1.32072e+08	5.24124e+07	4.78983e+07	7.9057e+07	3.75932e+07	3.88171e+07	High	High	High	High	High	High
Master Protein	I1JRM5	Aldo_ket_red domain-containing protein OS=Glycine max OX=3847 GN=102670317 PE=4 SV=1	0	328.897	74	20	281	16	339	37.4	6.7	909.75	20	3	4	1.546	1.573	0.809	1.063	0.999	1.065	0.846027	0.916183	0.989918	0.92792	0.979578	0.911872	109	97.1	102.4	91.6	3.82273e+08	3.15314e+08	3.07087e+08	2.71823e+08	2.80902e+08	2.91298e+08	3.59761e+08	2.94924e+08	2.96226e+08	2.43633e+08	2.65074e+08	3.30346e+08	High	High	High	High	High	High
Master Protein	I1M005	Formate dehydrogenase, mitochondrial OS=Glycine max OX=3847 GN=100794313 PE=3 SV=1	0	328.865	72	22	289	4	381	41.9	7.59	809.16	22	13	19	1.785	3.186	0.624	0.969	1.742	0.565	0.648357	0.185346	0.770255	0.996018	0.072835	0.0497415	75	86.8	81.7	156.5	8.95854e+07	7.35074e+07	1.05312e+08	7.92291e+07	1.03638e+08	1.25172e+08	8.69235e+07	1.56486e+08	9.76004e+07	2.16571e+08	1.86874e+08	1.50986e+08	High	Peak Found	High	High	High	High
Master Protein	I1KQD8	Semialdhyde_dh domain-containing protein OS=Glycine max OX=3847 GN=100814757 PE=3 SV=2	0	328.643	58	18	223	6	379	41.4	6.8	669.46	18	8	13	0.715	0.874	1.256	0.945	0.974	0.924	0.411907	0.841829	0.604191	0.979603	0.963895	0.996019	127.3	101	83.2	88.5	1.28559e+08	1.42883e+08	1.55773e+08	1.13382e+08	1.04312e+08	1.17083e+08	9.33414e+07	1.08806e+08	8.93972e+07	1.22685e+08	9.93086e+07	4.58867e+07	High	High	High	High	High	High
Master Protein	I1K5U0	Aldedh domain-containing protein OS=Glycine max OX=3847 GN=GLYMA_05G231900 PE=3 SV=1	0	328.569	67	28	362	5	538	58.5	6.55	832.69	28	5	22	1.751	2.003	0.594	1.046	1.014	1.028	0.679913	0.711408	0.693729	0.952674	0.986682	0.948976	104.6	103.9	110.4	81.1	3.2851e+08	3.00989e+08	2.86678e+08	3.25825e+08	2.988e+08	2.9595e+08	2.99666e+08	3.17674e+08	3.52596e+08	2.33353e+08	2.27086e+08	3.07497e+08	High	High	High	High	High	High
Master Protein	Q949H4	Urease OS=Glycine max OX=3847 GN=ure PE=2 SV=1	0	328.187	47	28	286	28	837	90.7	6.18	700.98	28	11	0	1.632	1.715	0.641	0.99	1.079	0.945	0.784734	0.886571	0.837936	0.99702	0.993983	0.997617	96.9	103.1	102.2	97.9	6.32022e+07	4.62424e+07	5.62489e+07	5.98756e+07	7.08883e+07	4.97736e+07	5.93231e+07	6.31523e+07	5.59364e+07	5.68245e+07	5.31972e+07	6.24399e+07	High	High	High	High	High	High
Master Protein	C6TCA1	Peroxidase OS=Glycine max OX=3847 GN=100795412 PE=2 SV=1	0	328.1	73	21	433	21	345	38.1	6.44	1217.5	21	16	0	0.83	0.44	1.318	1.108	0.56	2.099	0.673877	0.116918	0.509763	0.777057	0.0136768	0.000127072	149.9	91.7	104.5	54	6.12874e+08	8.81926e+08	7.853e+08	4.80216e+08	4.08997e+08	5.53736e+08	8.68217e+08	3.59804e+08	5.47613e+08	2.03435e+08	3.11105e+08	2.82698e+08	High	High	High	High	High	High
Master Protein	I1N1N3	Uncharacterized protein OS=Glycine max OX=3847 GN=100809646 PE=3 SV=2	0	327.954	55	18	400	7	489	52.2	7.46	1264.32	18	18; 4	11	1.205	1.407	0.812	0.958	0.894	1.052	0.998946	0.959958	0.990702	0.989612	0.875488	0.919741	110.3	100.8	97.6	91.2	1.05461e+08	9.13242e+07	1.16978e+08	9.00907e+07	1.01605e+08	9.63995e+07	1.10976e+08	8.29878e+07	9.33278e+07	8.13738e+07	1.02694e+08	8.7179e+07	High	High	High	High	High	High
Master Protein	K7LLW8	Uncharacterized protein OS=Glycine max OX=3847 GN=100797752 PE=4 SV=1	0	327.791	33	26	217	2	1085	117.2	7.88	633.94	26	10	24	1.733	1.629	0.663	1.071	1.124	0.952	0.729677	0.928481	0.872861	0.906675	0.963628	0.997603	76.7	96.6	107.5	119.2	2.47822e+07	2.99474e+07	3.72383e+07	4.63501e+07	3.77185e+07	3.46776e+07	4.19582e+07	4.77676e+07	4.04877e+07	6.48905e+07	3.45219e+07	4.6544e+07	High	High	High	High	High	High
Master Protein	C6TDF5	Formate dehydrogenase, mitochondrial OS=Glycine max OX=3847 GN=100797606 PE=2 SV=1	0	327.735	72	21	296	1	381	41.9	7.36	854.51	21	19	2	0.42	0.758	1.395	0.646	0.799	0.505	0.0727096	0.788861	0.621658	0.0132469	0.656943	0.0194356	127.2	96.4	49.1	127.3	9.9984e+06	7.1599e+06	1.57658e+07	5.3624e+06	1.00772e+07	7.57718e+06	2.54923e+06	1.36573e+07	3.85659e+06	2.18092e+07	1.00092e+07	399429	Peak Found	Peak Found	High	High	High	Peak Found
Master Protein	K7LVH5	Uncharacterized protein OS=Glycine max OX=3847 GN=100819481 PE=3 SV=1	0	327.463	51	34	277	3	741	82.3	6.39	693.14	34	12	0	0.631	0.608	1.599	1.007	0.957	0.99	0.435635	0.550072	0.405208	0.996018	0.957982	0.973791	132.2	76	82.7	109.1	1.04662e+07	1.18127e+07	9.87776e+06	1.2821e+07	5.47658e+06	6.0135e+06	6.55042e+06	7.05983e+06	4.64328e+06	1.41912e+07	8.63419e+06	3.78378e+06	High	High	High	High	High	High
Master Protein	A9CPA7	Protein disulfide isomerase family OS=Glycine max OX=3847 GN=GmPDIM PE=2 SV=1	0	327.022	67	21	223	5	438	47.6	5.55	767.78	21	14	16	1.117	1.017	0.931	0.963	0.983	1.029	0.970639	0.931088	0.957283	0.994897	0.965028	0.948976	126.8	99.9	94.4	78.9	1.41915e+08	1.33614e+08	1.58568e+08	1.22849e+08	1.11831e+08	1.0642e+08	1.05607e+08	1.04158e+08	1.07309e+08	8.82861e+07	1.02294e+08	7.95883e+07	High	High	High	High	High	High
Master Protein	I1JD78	Glutathione reductase OS=Glycine max OX=3847 GN=100810846 PE=3 SV=1	0	326.74	56	22	358	8	501	54	5.87	979.37	22	2	0	1.109	0.984	0.887	1.003	0.904	1.114	0.96739	0.909776	0.986228	0.99582	0.914019	0.828954	107.8	112.2	105.3	74.7	2.84716e+07	3.55833e+07	3.9477e+07	3.74877e+07	3.70285e+07	3.50744e+07	3.0328e+07	3.8757e+07	3.47439e+07	2.46381e+07	3.2278e+07	2.25676e+07	High	High	High	High	High	High
Master Protein	I1MH75	WD_REPEATS_REGION domain-containing protein OS=Glycine max OX=3847 GN=GLYMA_15G169800 PE=4 SV=1	0	326.352	63	16	222	11	508	56.5	6.54	708.64	16	15	5	0.78	0.762	1.094	0.96	0.911	0.975	0.567491	0.699258	0.811102	0.992912	0.911771	0.983378	129.1	101.1	79.9	89.9	1.27576e+08	1.53408e+08	1.54022e+08	1.20201e+08	1.21332e+08	1.18373e+08	8.58926e+07	1.33696e+08	9.49566e+07	1.32963e+08	1.06924e+08	5.35353e+07	High	High	High	High	High	High
Master Protein	A0A0R4J4U7	Peroxidase OS=Glycine max OX=3847 GN=547871 PE=3 SV=1	0	326.146	65	17	1030	3	326	35.6	7.46	2767.01	17	12	3	0.74	0.448	1.284	1.016	0.734	1.428	0.471019	0.129292	0.564291	0.989055	0.356699	0.159587	134.7	105.9	92.7	66.7	3.54076e+08	3.59331e+08	5.10155e+08	3.21002e+08	2.03872e+08	2.82527e+08	2.92169e+08	2.47369e+08	2.38222e+08	1.77942e+08	1.93293e+08	1.76834e+08	High	High	High	High	High	High
Master Protein	K7MYU5	Eukaryotic translation initiation factor 3 subunit A OS=Glycine max OX=3847 GN=100782598 PE=3 SV=1	0	326.113	39	30	244	3	957	111.7	9.33	636.9	30	19	0	1.261	1.473	0.872	1.066	1.36	0.783	0.980418	0.959797	0.999879	0.950206	0.733527	0.883727	85.1	95.6	94.3	125	3.83507e+06	5.44238e+06	4.85765e+06	5.45229e+06	5.55101e+06	3.78647e+06	3.83864e+06	6.48827e+06	5.38053e+06	7.12939e+06	4.88503e+06	7.16321e+06	High	High	High	High	High	High
Master Protein	I1KL36	Uncharacterized protein OS=Glycine max OX=3847 GN=GLYMA_07G180100 PE=3 SV=1	0	325.178	55	18	359	5	445	46.7	8.03	1155.09	18	7	14	1.071	0.981	0.951	0.977	0.942	1.077	0.94565	0.915777	0.945512	0.996259	0.938022	0.890967	104.3	100.2	97.9	97.6	2.18959e+08	1.78167e+08	2.06972e+08	1.7904e+08	1.98791e+08	2.16044e+08	2.60622e+08	1.92993e+08	1.94348e+08	1.42112e+08	1.93741e+08	2.23102e+08	High	High	High	High	High	High
Master Protein	A0A0R0IW79	Uncharacterized protein OS=Glycine max OX=3847 GN=100798228 PE=4 SV=1	0	324.464	37	33	205	9	1346	146.2	5.91	541.17	33	8	23	1.399	1.88	0.637	0.873	1.135	0.752	0.931191	0.821137	0.819554	0.760189	0.963895	0.764485	92.2	114.9	88.6	104.3	3.89721e+07	4.46788e+07	4.69355e+07	5.56833e+07	6.25575e+07	4.83365e+07	4.29336e+07	6.03104e+07	3.99667e+07	4.57712e+07	5.05253e+07	7.01671e+07	High	High	High	High	High	High
Master Protein	I1LEY1	Uncharacterized protein OS=Glycine max OX=3847 GN=100819623 PE=4 SV=1	0	323.692	63	23	195	3	585	65.4	5.03	598.67	23	10	1	0.724	1.18	1.572	1.045	1.855	0.46	0.765605	0.994509	0.604191	0.989478	0.358761	0.0785559	161.1	80.8	86.2	71.9	3.22995e+06	2.13643e+06	2.92257e+06	2.77597e+06	1.46653e+06	966636	1.26068e+06	2.59571e+06	1.56327e+06	5.73486e+06	1.30501e+06	1.04764e+06	High	High	Peak Found	High	High	High
Master Protein	A0A0R0IVG1	Peptidase_S9 domain-containing protein OS=Glycine max OX=3847 GN=100784480 PE=4 SV=1	0	323.663	49	25	214	21	740	82.4	6.13	611.4	25	8	4	1.056	0.911	0.948	0.99	0.88	1.081	0.935994	0.886571	0.947228	0.996277	0.845787	0.89555	96.3	109.5	107.4	86.7	4.67388e+07	4.64764e+07	5.5899e+07	5.53456e+07	5.03004e+07	5.31226e+07	4.52018e+07	5.6311e+07	5.21143e+07	4.20724e+07	4.59456e+07	3.60931e+07	High	High	High	High	High	High
Master Protein	I1KIF0	Malic enzyme OS=Glycine max OX=3847 GN=100806545 PE=3 SV=1	0	322.796	60	29	236	5	604	66.6	6.49	695.09	29	7	0	2.887	4.149	0.423	1.126	1.495	0.707	0.244135	0.301345	0.490671	0.830172	0.565905	0.684525	29.3	95	102.2	173.4	2.10484e+06	1.31515e+06	1.16254e+06	2.87709e+06	4.25861e+06	4.41655e+06	4.83475e+06	3.9022e+06	4.58286e+06	1.04888e+07	4.23936e+06	7.77463e+06	High	High	High	High	High	High
Master Protein	I1KLQ4	GB1/RHD3-type G domain-containing protein OS=Glycine max OX=3847 GN=100796442 PE=4 SV=1	0	322.732	42	34	287	6	1060	120.1	7.49	717.51	34	7	26	1.136	1.313	0.875	0.971	1.041	0.89	0.977856	0.987201	0.986228	0.996239	0.998905	0.982511	100	104.2	93.6	102.2	6.76645e+07	5.49428e+07	6.18791e+07	6.38561e+07	6.62398e+07	6.44597e+07	5.79079e+07	6.93353e+07	5.62398e+07	5.38771e+07	6.63244e+07	6.32096e+07	High	Peak Found	High	High	High	High
Master Protein	A0A0R0HQB8	Purple acid phosphatase OS=Glycine max OX=3847 GN=GLYMA_10G071000 PE=3 SV=1	0	322.71	66	19	292	17	421	48.3	6.55	709.02	19	10	2	1.208	0.558	0.837	0.995	0.475	2.281	0.999918	0.363495	0.999879	0.996239	0.000468105	4.21158e-05	129.1	104.2	117.8	48.8	7.99154e+07	9.23721e+07	1.08046e+08	8.89741e+07	5.75072e+07	7.4574e+07	1.07207e+08	4.73727e+07	8.43154e+07	4.74552e+07	3.4953e+07	2.2391e+07	High	High	High	High	High	High
Master Protein	I1N0Y1	Imidazole glycerol phosphate synthase hisHF OS=Glycine max OX=3847 GN=100815533 PE=3 SV=2	0	322.443	56	26	326	2	580	62.9	6.04	909.58	26	18	0	0.819	0.673	1.246	1.008	0.671	1.562	0.860667	0.822541	0.854239	0.996239	0.571931	0.306307	108.1	84.4	88.5	118.9	1.49837e+06	994689	1.36167e+06	1.20235e+06	1.03996e+06	1.06359e+06	1.04864e+06	1.11548e+06	1.15119e+06	1.52707e+06	1.49819e+06	886737	High	High	High	High	High	High
Master Protein	A0A0R0GAA6	Beta-galactosidase OS=Glycine max OX=3847 GN=100818981 PE=3 SV=1	0	322.201	50	24	218	11	732	81.4	8.41	571.4	24	14	12	0.546	0.385	1.647	0.939	0.664	1.505	0.0938848	0.079802	0.18019	0.974156	0.155691	0.105048	178	85.4	88.3	48.3	7.71985e+07	9.09806e+07	8.26904e+07	5.84658e+07	3.9654e+07	3.45707e+07	4.10184e+07	3.57217e+07	4.80075e+07	1.99557e+07	2.82332e+07	2.24557e+07	High	High	High	High	High	High
Master Protein	I1MJM1	Clustered mitochondria protein homolog OS=Glycine max OX=3847 GN=100785880 PE=3 SV=2	0	321.84	36	34	173	9	1433	155.9	6.38	381.49	34	15	0	1.413	1.845	0.623	0.913	1.305	0.664	0.931413	0.90725	0.839397	0.962602	0.879184	0.644987	71.4	110	94.1	124.4	3.22499e+06	2.2226e+06	2.57225e+06	4.67087e+06	3.96268e+06	2.35416e+06	2.91131e+06	5.61177e+06	3.3889e+06	5.10133e+06	2.25874e+06	4.48048e+06	High	High	High	High	High	High
Master Protein	I1NFK8	Uncharacterized protein OS=Glycine max OX=3847 GN=GLYMA_20G117100 PE=3 SV=2	0	321.676	50	31	294	6	748	84.8	6.52	766.03	31	20	25	1.346	1.776	0.696	0.981	1.199	0.804	0.950683	0.867417	0.91204	0.999252	0.915525	0.888169	81.2	98.9	95.9	124	5.24502e+07	5.17255e+07	4.76334e+07	6.29858e+07	6.80933e+07	5.41231e+07	6.06195e+07	6.13019e+07	6.10741e+07	7.89327e+07	6.33765e+07	7.99303e+07	High	High	High	High	High	High
Master Protein	I1N4K3	Uncharacterized protein OS=Glycine max OX=3847 GN=100810004 PE=4 SV=1	0	321.662	48	26	268	13	655	73.7	7.85	812.46	26	18	1	1.099	1.225	0.865	0.967	1.036	0.891	0.965044	0.986861	0.981931	0.996239	0.999952	0.982511	87.1	102.3	94.2	116.3	1.77798e+07	2.19282e+07	2.77972e+07	3.05433e+07	2.54739e+07	2.5753e+07	1.79164e+07	3.13972e+07	2.37063e+07	3.63816e+07	2.21625e+07	2.92723e+07	High	High	High	High	High	High
Master Protein	K7MXH4	GYF domain-containing protein OS=Glycine max OX=3847 GN=100803441 PE=4 SV=1	0	321.434	35	36	180	21	1616	179	6.19	428.52	36	19	15	1.535	1.56	0.613	0.867	0.941	0.912	0.862093	0.928455	0.770806	0.73232	0.935624	0.984541	92.7	111.6	94	101.7	4.35219e+07	4.29164e+07	2.77701e+07	4.77936e+07	5.28662e+07	5.16525e+07	4.37386e+07	4.23397e+07	4.35081e+07	3.68577e+07	4.70719e+07	5.13677e+07	High	High	High	High	High	High
Master Protein	I1NJ89	Leuk-A4-hydro_C domain-containing protein OS=Glycine max OX=3847 GN=100807911 PE=4 SV=1	0	320.709	65	26	304	26	610	68.5	5.81	901.87	26	20	0	1.026	0.95	0.943	0.973	0.858	1.083	0.914877	0.887685	0.948681	0.996239	0.788903	0.881976	107.3	98.5	110.2	83.9	9.78719e+07	9.79207e+07	9.16306e+07	8.98272e+07	9.79118e+07	8.55428e+07	1.07736e+08	1.00505e+08	7.9744e+07	8.38327e+07	7.50683e+07	7.6498e+07	High	High	High	High	High	High
Master Protein	I1LFD7	CPSF_A domain-containing protein OS=Glycine max OX=3847 GN=100775785 PE=4 SV=1	0	320.652	34	32	191	2	1214	134.9	5.55	455.25	32	10	0	1.242	1.562	0.776	0.999	1.103	0.865	0.992687	0.962669	0.986228	0.993579	0.996877	0.983967	87.9	105	107.1	100	522423	845211	654133	914942	780763	545971	520988	798404	796848	1.42178e+06	743734	628481	High	High	Peak Found	Peak Found	Peak Found	Peak Found
Master Protein	I1MHG6	Aldedh domain-containing protein OS=Glycine max OX=3847 GN=100811186 PE=3 SV=1	0	320.619	72	23	308	5	508	54.1	5.67	892.17	23	15	0	2.178	2.372	0.557	1.007	1.289	0.753	0.53372	0.702433	0.74147	0.99582	0.805228	0.798687	56.1	86.2	113.4	144.4	7.33495e+06	8.25541e+06	9.75811e+06	1.23357e+07	1.26962e+07	1.52544e+07	1.9192e+07	1.66924e+07	1.23733e+07	1.52653e+07	2.12596e+07	2.77747e+07	High	High	High	High	High	High
Master Protein	I1MM44	Glyceraldehyde-3-phosphate dehydrogenase OS=Glycine max OX=3847 GN=100789951 PE=3 SV=1	0	320.299	62	22	612	3	418	44.8	8.65	1168.42	22	16	0	0.887	0.799	1.087	0.862	0.89	0.941	0.806353	0.763677	0.8319	0.737297	0.869469	0.999972	114.5	111.6	98.4	75.5	13987980	3.7182e+07	3.22455e+07	3.14197e+07	2.91655e+07	3.3234e+07	2.53006e+07	2.77119e+07	2.93089e+07	1.62823e+07	2.12452e+07	2.94205e+07	High	High	High	High	High	High
Master Protein	I1MTP0	Plasma membrane ATPase OS=Glycine max OX=3847 GN=100802859 PE=3 SV=1	0	320.282	34	28	309	5	955	105	6.73	789.02	28	17	0	1.374	1.426	1.023	1.325	1.175	1.088	0.952202	0.993634	0.942924	0.291387	0.965028	0.932779	105.4	105.2	111.1	78.3	1.73522e+06	1.84279e+06	3.05982e+06	9.50802e+06	1.65325e+06	1.84001e+06	1.94212e+06	1.8366e+06	6.4831e+06	4.02193e+06	518304	1.36941e+06	Peak Found	High	High	High	Peak Found	Peak Found
Master Protein	K7KI86	Aminopeptidase OS=Glycine max OX=3847 GN=100811437 PE=3 SV=1	0	320.14	46	32	187	15	873	98.5	5.64	455.29	32	4	17	2.21	3.205	0.651	1.296	1.612	0.754	0.329521	0.32905	0.871834	0.109521	0.179136	0.700756	69.3	86.6	117.8	126.4	2.39477e+07	2.32478e+07	2.40441e+07	3.54706e+07	2.99311e+07	2.91948e+07	3.37645e+07	4.57426e+07	4.07226e+07	8.25973e+07	3.1175e+07	4.37023e+07	High	High	High	High	High	High
Master Protein	I1JC43	Uncharacterized protein OS=Glycine max OX=3847 GN=GLYMA_02G036300 PE=4 SV=1	0	319.895	63	22	299	4	423	46.6	5.72	708.6	22	2	20	0.933	0.908	0.967	0.868	0.894	0.996	0.834553	0.873153	0.933813	0.74415	0.875488	0.976026	95.6	92.5	76	135.9	1.95841e+08	1.67515e+08	1.50773e+08	1.7316e+08	1.61988e+08	1.56882e+08	2.23193e+08	1.25374e+08	1.33127e+08	2.48698e+08	1.59507e+08	2.38055e+08	High	High	High	High	High	High
Master Protein	I1KQC2	Uncharacterized protein OS=Glycine max OX=3847 GN=100798582 PE=3 SV=1	0	319.449	57	26	289	4	617	69.3	7.87	828.52	26	8	20	0.831	0.809	1.111	0.875	0.884	0.957	0.675641	0.791172	0.787553	0.774155	0.857568	0.995456	95	103.4	103.1	98.5	1.30596e+08	9.86815e+07	9.60135e+07	9.99504e+07	1.17689e+08	1.07387e+08	1.1183e+08	7.418e+07	1.07158e+08	7.68801e+07	1.02348e+08	1.16364e+08	High	High	High	High	High	Peak Found
Master Protein	I1K9B8	EMC1_C domain-containing protein OS=Glycine max OX=3847 GN=100790095 PE=4 SV=1	0	318.814	45	33	200	10	983	110.3	7.01	447.55	33	6	22	1.48	1.927	0.791	1.074	1.372	0.792	0.880518	0.812127	0.986228	0.880209	0.678358	0.861991	83	84.7	107.1	125.3	2.90015e+07	3.9723e+07	3.58938e+07	4.38832e+07	3.59796e+07	3.662e+07	4.63197e+07	4.73019e+07	3.84219e+07	7.50492e+07	5.21403e+07	5.41767e+07	High	High	High	High	High	High
Master Protein	A0A0R4J3I5	Uncharacterized protein OS=Glycine max OX=3847 GN=GLYMA_06G137100 PE=3 SV=1	0	318.364	81	19	295	5	365	39.9	5.91	700.72	19	6	2	0.807	0.522	1.116	0.871	0.569	1.501	0.627215	0.268977	0.782577	0.748323	0.0143893	0.125449	127.2	109.2	93.4	70.2	8.02959e+07	5.1692e+07	9.35826e+07	7.3872e+07	5.97743e+07	6.89339e+07	5.21405e+07	5.89183e+07	6.61843e+07	5.78446e+07	4.42867e+07	2.77322e+07	High	High	High	High	High	High
Master Protein	I1JDT9	Glucose-6-phosphate 1-dehydrogenase OS=Glycine max OX=3847 GN=100793694 PE=3 SV=1	0	317.938	61	32	310	4	602	68.1	8.15	657.83	32	2	1	4.665	6.462	0.207	0.988	1.446	0.706	0.0187024	0.0716799	0.00551077	0.999892	0.62967	0.603786	22.7	111.3	92.6	173.5	1.63694e+06	1.17977e+06	775290	3.27136e+06	5.78316e+06	6.97029e+06	4.79409e+06	4.81053e+06	6.18427e+06	9.58212e+06	6.21873e+06	9.01524e+06	High	Peak Found	High	High	High	High
Master Protein	A0A0R0H0I8	Uncharacterized protein OS=Glycine max OX=3847 GN=100792355 PE=3 SV=1	0	317.646	63	22	281	4	490	54.1	7.31	801.21	22	12	0	0.947	0.922	1.357	1.03	1.253	0.916	0.917628	0.922183	0.736544	0.984466	0.893322	0.989821	117.9	84.8	87.6	109.6	8.4554e+06	6.56784e+06	6.85712e+06	4.93392e+06	4.99734e+06	4.18904e+06	7.51512e+06	5.09705e+06	4.50223e+06	6.3733e+06	8.72266e+06	4.87488e+06	High	High	High	High	High	High
Master Protein	I1JS66	AAA domain-containing protein OS=Glycine max OX=3847 GN=GLYMA_03G262800 PE=3 SV=1	0	317.63	75	31	467	31	426	47.7	6.47	1018.43	31	3	0	1.915	3.064	0.578	1.067	1.356	0.747	0.528732	0.214613	0.647684	0.916471	0.626906	0.690243	74.1	106	107.2	112.7	1.52554e+08	1.32986e+08	1.09966e+08	1.56555e+08	2.17638e+08	1.90078e+08	2.09486e+08	1.60683e+08	1.92216e+08	2.0223e+08	1.94284e+08	3.12837e+08	High	High	High	High	High	High
Master Protein	I1M057	GB1/RHD3-type G domain-containing protein OS=Glycine max OX=3847 GN=100808644 PE=4 SV=1	0	317.513	40	33	285	4	1060	120.3	7.91	715.03	33	13	1	1.354	1.295	0.789	1.081	1.258	0.821	0.966316	0.999972	0.986228	0.906675	0.826458	0.919741	26.4	91.9	113.9	167.8	6.05174e+06	5.43013e+06	3.65251e+06	1.17272e+07	1.89284e+07	2.36813e+07	2.40158e+07	1.41284e+07	2.3467e+07	5.38641e+07	1.98942e+07	3.45585e+07	High	High	Peak Found	High	High	Peak Found
Master Protein	A0A0R0GFW6	Phosphoglycerate kinase OS=Glycine max OX=3847 GN=GLYMA_15G261900 PE=3 SV=1	0	317.034	64	22	484	4	483	50	8.15	1345.26	22	15	0	1.599	2.09	0.717	1.17	1.189	1.004	0.860667	0.839758	0.96042	0.560241	0.917154	0.976006	63	122.6	103.9	110.4	1.78513e+07	1.47784e+07	1.47917e+07	2.04244e+07	2.87833e+07	3.199e+07	2.43771e+07	2.3519e+07	3.9901e+07	2.59196e+07	4.08408e+07	2.36729e+07	High	High	High	High	High	High
Master Protein	I1KWF3	Uncharacterized protein OS=Glycine max OX=3847 GN=100819911 PE=4 SV=1	0	316.968	53	27	288	13	653	73.4	7.17	841.68	27	8	14	1.388	1.263	0.802	1.069	1.146	0.907	0.935082	0.997299	0.986228	0.912131	0.950455	0.983378	54.8	108.6	121.8	114.8	1.28321e+08	1.32698e+08	1.23087e+08	2.19394e+08	2.54465e+08	3.02603e+08	3.10458e+08	2.36597e+08	2.85533e+08	2.69082e+08	2.43936e+08	3.46661e+08	High	High	High	High	High	High
Master Protein	A0A0R0GXD9	Peroxidase OS=Glycine max OX=3847 GN=547872 PE=3 SV=1	0	316.888	62	16	1073	1	324	35.3	7.68	2914.52	16	13	0	0.464	0.152	4.386	0.708	0.457	2.989	0.0699816	0.00075346	7.25714e-06	0.100919	0.00563387	4.31696e-09	222.7	40.2	103.4	33.8	1.41383e+07	3.47879e+07	3.23593e+07	3.64309e+07	5.83491e+06	3.22316e+06	2.28051e+06	1.50272e+07	2.06302e+07	4.90678e+06	1.66378e+07	762989	High	High	High	High	High	High
Master Protein	I1LM82	Glutamate decarboxylase OS=Glycine max OX=3847 GN=GLYMA_11G213000 PE=3 SV=1	0	316.499	76	25	330	3	408	46.3	6.39	798.72	25	11	2	0.84	0.867	1.064	1.024	1.652	0.651	0.805122	0.874788	0.91274	0.990584	0.280748	0.392519	87.8	91.9	105.3	115	7.28759e+06	1.18224e+07	8.0263e+06	9.63149e+06	8.39357e+06	8.39843e+06	1.24046e+07	5.53756e+06	9.62684e+06	1.71663e+07	6.44867e+06	1.05169e+07	High	High	High	High	High	High
Master Protein	I1JTB8	Glucose-6-phosphate isomerase OS=Glycine max OX=3847 GN=GLYMA_04G032600 PE=3 SV=1	0	316.241	68	24	291	14	568	62.6	6.33	727.78	24	4	10	1.253	1.609	0.846	1.065	1.22	0.859	0.990335	0.902675	0.998923	0.921549	0.880494	0.95138	87.9	98.3	102.6	111.2	1.10925e+08	1.10696e+08	1.16548e+08	1.33347e+08	1.24037e+08	1.12734e+08	1.12557e+08	1.48539e+08	1.29477e+08	1.65432e+08	1.11718e+08	1.40382e+08	High	High	High	High	High	High
Master Protein	I1L1Q8	Aldedh domain-containing protein OS=Glycine max OX=3847 GN=GLYMA_09G070300 PE=3 SV=1	0	315.686	71	24	295	6	509	54.4	6.04	861.05	24	9	19	1.433	1.683	0.714	0.965	1.034	0.923	0.908238	0.899743	0.923679	0.99582	0.998442	0.995692	90.5	101.6	104.2	103.7	7.57887e+07	6.32069e+07	8.0804e+07	8.46733e+07	8.50602e+07	9.49432e+07	8.72559e+07	9.38424e+07	8.57942e+07	1.04263e+08	8.51932e+07	8.6853e+07	High	High	High	High	High	High
Master Protein	I1N1F9	Aldedh domain-containing protein OS=Glycine max OX=3847 GN=100777399 PE=3 SV=2	0	315.196	67	26	391	3	536	58.3	7.15	992.91	26	18	24	2.027	2.534	0.572	1.164	1.13	0.971	0.424571	0.418676	0.633319	0.533424	0.9604	0.983378	90.4	91.7	109.6	108.3	2.08881e+08	1.58787e+08	1.84978e+08	1.7272e+08	2.02787e+08	1.87566e+08	2.24195e+08	2.02578e+08	2.28067e+08	2.21486e+08	1.95006e+08	2.43959e+08	High	High	High	High	High	High
Master Protein	I1JCQ7	Succinate dehydrogenase [ubiquinone] flavoprotein subunit, mitochondrial OS=Glycine max OX=3847 GN=100802169 PE=3 SV=1	0	315.159	45	19	405	5	634	69.7	6.76	1102.08	19	2	0	1.382	1.25	0.79	0.904	0.724	1.086	0.962969	0.997855	0.980093	0.93802	0.433452	0.862898	88.5	115.4	105.5	90.6	8.13578e+06	6.26202e+06	6.95582e+06	8.04855e+06	9.9925e+06	9.06585e+06	8.29009e+06	8.9996e+06	6.10441e+06	6.95524e+06	7.65393e+06	7.11657e+06	High	High	High	High	High	High
Master Protein	K7MJN5	Lysine--tRNA ligase OS=Glycine max OX=3847 GN=100789811 PE=3 SV=1	0	315.007	51	28	309	10	602	68.6	6.51	650.06	28	17	0	1.765	2.098	0.6	1.085	1.287	0.83	0.791616	0.819786	0.807064	0.891616	0.807539	0.938337	64.4	110.5	99.8	125.4	1.31458e+07	1.0414e+07	7.99e+06	1.5415e+07	1.78624e+07	1.83064e+07	1.61324e+07	1.57081e+07	1.99895e+07	9.5846e+06	2.02749e+07	2.48971e+07	High	High	High	High	High	High
Master Protein	I1NFB2	Uncharacterized protein OS=Glycine max OX=3847 GN=100813263 PE=4 SV=2	0	314.498	32	25	206	1	1087	117.5	7.72	610.55	25	20	0	1.399	1.958	0.692	0.929	1.239	0.718	0.96366	0.920767	0.94135	0.986741	0.9604	0.847982	71.4	102.1	100	126.5	717304	785094	501403	1.02551e+06	1.13489e+06	989469	711123	1.05463e+06	1.00378e+06	1.53709e+06	990099	1.27012e+06	Peak Found	Peak Found	Peak Found	Peak Found	High	High
Master Protein	K7LGW1	Uncharacterized protein OS=Glycine max OX=3847 GN=GLYMA_10G016200 PE=3 SV=1	0	313.915	49	16	259	5	558	60.4	9.2	1002.68	16	10	0	0.831	0.871	1.236	1.001	0.998	1.017	0.690365	0.869658	0.693613	0.996239	0.983102	0.966172	134.6	90.9	90.2	84.3	4.16059e+07	5.137e+07	5.07061e+07	3.4228e+07	4.19203e+07	3.14963e+07	2.79493e+07	3.82951e+07	3.39905e+07	3.17724e+07	3.63813e+07	1.92719e+07	High	High	High	High	High	High
Master Protein	A0A0R0KQE9	Uncharacterized protein OS=Glycine max OX=3847 GN=100797017 PE=4 SV=1	0	313.634	65	24	324	16	459	50.7	7.21	908.36	24	2	9	0.777	0.586	0.984	0.908	0.548	1.552	0.562122	0.37376	0.920812	0.916091	0.00925488	0.0555089	138.6	103.3	95.6	62.4	1.73196e+08	1.79806e+08	1.8152e+08	1.8e+08	1.07318e+08	1.33994e+08	1.81413e+08	8.84825e+07	1.24019e+08	9.16737e+07	6.47047e+07	8.09916e+07	High	High	High	High	High	High
Master Protein	I1KJS2	ATP-dependent 6-phosphofructokinase OS=Glycine max OX=3847 GN=100776597 PE=3 SV=1	0	313.449	66	26	365	8	536	58.5	7.56	910.75	26	7	19	1.929	1.709	0.652	1.252	1.156	1.14	0.517105	0.869429	0.829349	0.172831	0.944974	0.777722	80.5	96.1	118.4	105	1.45894e+08	1.39606e+08	1.35917e+08	1.62697e+08	1.66627e+08	1.90907e+08	2.48788e+08	2.0533e+08	2.03637e+08	1.81979e+08	1.68968e+08	2.10538e+08	High	High	High	High	High	High
Master Protein	I1K2B5	Uncharacterized protein OS=Glycine max OX=3847 GN=100815413 PE=3 SV=1	0	313.384	43	23	252	9	755	79.6	6.6	850.77	23	5	0	0.727	0.577	1.16	0.82	0.68	1.241	0.550114	0.46533	0.723648	0.574995	0.210384	0.560753	135	105.2	90.5	69.3	3.60094e+07	2.96378e+07	3.0313e+07	2.57098e+07	2.36076e+07	2.23533e+07	2.03269e+07	1.85272e+07	2.14314e+07	1.18766e+07	1.5556e+07	1.60218e+07	High	High	High	High	High	High
Master Protein	A0A0R0KK47	Coatomer subunit alpha OS=Glycine max OX=3847 GN=100778853 PE=4 SV=1	0	312.987	39	35	160	22	1221	137.1	7.49	347.83	35	4	0	1.687	2.286	0.642	1.006	1.245	0.808	0.812827	0.769904	0.879496	0.994483	0.855569	0.872034	53.5	108.4	111.9	126.2	2.0375e+07	1.33406e+07	1.19781e+07	2.61393e+07	2.70507e+07	3.11356e+07	2.79078e+07	2.79018e+07	2.91497e+07	4.63515e+07	2.66114e+07	3.14866e+07	High	High	High	High	High	High
Master Protein	I1MFI3	Aminomethyltransferase OS=Glycine max OX=3847 GN=100800509 PE=3 SV=1	0	312.67	72	23	385	4	407	44.3	8.56	1007.39	23	15	22	1.688	1.444	0.617	0.994	0.966	0.966	0.738695	0.948714	0.751338	0.996239	0.957982	0.984782	122.4	95	93.2	89.3	5.79245e+08	4.86014e+08	6.19208e+08	4.49649e+08	4.05502e+08	4.66984e+08	4.40939e+08	5.20102e+08	4.24608e+08	3.48781e+08	4.37878e+08	4.22569e+08	High	High	High	High	High	High
Master Protein	Q5F2M9	Glutamate dehydrogenase OS=Glycine max OX=3847 GN=gdh1 PE=2 SV=1	0	312.449	64	18	275	3	411	44.5	6.47	851.46	18	16	0	1.224	1.549	0.666	0.732	1.146	0.634	0.998683	0.953174	0.907561	0.167825	0.963982	0.294034	119.1	94.8	89	97	1.27986e+07	4.90965e+06	1.36806e+07	7.99717e+06	1.01898e+07	1.09893e+07	1.68265e+07	9.56193e+06	6.59335e+06	2.8242e+07	8.08943e+06	1.04251e+07	High	High	High	High	High	High
Master Protein	Q6X0N7	Beta-galactosidase OS=Glycine max OX=3847 GN=GLYMA_08G111000 PE=3 SV=1	0	312.287	41	25	193	25	909	102.4	6.57	516.44	25	8	0	1.324	1.538	0.857	1.115	1.296	0.808	0.963671	0.938032	0.998222	0.731034	0.756276	0.89555	96.3	96.4	93	114.3	5.27285e+07	6.89676e+07	7.54684e+07	7.46841e+07	6.90276e+07	6.2852e+07	4.87826e+07	1.00301e+08	6.65491e+07	8.18031e+07	9.40043e+07	5.20401e+07	High	High	High	High	High	High
Master Protein	I1J574	Uncharacterized protein OS=Glycine max OX=3847 GN=GLYMA_01G028900 PE=4 SV=1	0	312.254	63	21	289	4	423	46.6	5.6	606.38	21	1	0	2.506	5.413	0.355	0.951	1.923	0.561	0.384477	0.0603945	0.175376	0.987496	0.065673	0.0950212	52.4	84.6	77	186	4.39317e+06	4.27743e+06	2.95338e+06	5.62184e+06	6.90796e+06	8.7798e+06	1.30052e+07	2.67528e+06	6.28825e+06	1.82284e+07	1.00197e+07	1.5181e+07	High	High	High	High	High	High
Master Protein	I1M4L1	Uncharacterized protein OS=Glycine max OX=3847 GN=100801743 PE=3 SV=1	0	311.955	52	35	276	4	742	82.4	6.39	689.64	35	13	32	1.06	0.974	1.017	1.005	0.899	1.182	0.939497	0.911511	0.891815	0.99582	0.888168	0.662856	117.4	100.1	100.2	82.3	9.91298e+07	8.9135e+07	8.7179e+07	9.56539e+07	6.32699e+07	7.59926e+07	9.39603e+07	6.8593e+07	7.60404e+07	6.24641e+07	6.92554e+07	4.72006e+07	High	High	High	High	High	High
Master Protein	K7MYB6	HP domain-containing protein OS=Glycine max OX=3847 GN=100787208 PE=4 SV=1	0	311.39	39	30	208	10	984	108.4	5.71	572.53	30	19	0	0.83	0.802	0.858	0.884	0.749	1.188	0.837018	0.887318	0.998779	0.870642	0.580216	0.772397	101.4	106.9	108.7	83	5.89014e+06	5.79789e+06	5.37829e+06	8.10357e+06	6.11613e+06	5.92614e+06	6.36324e+06	5.54896e+06	6.21514e+06	2.71427e+06	4.74717e+06	5.01377e+06	High	High	High	High	High	High
Master Protein	I1N5V6	Uncharacterized protein OS=Glycine max OX=3847 GN=100794600 PE=4 SV=1	0	311.275	57	28	232	28	643	73.4	7.78	609.9	28	19	0	1.72	1.987	0.614	1.092	1.181	0.863	0.702947	0.785735	0.771708	0.798345	0.935624	0.963491	76.1	112.2	120.1	91.6	3.71114e+07	4.03588e+07	6.12577e+07	6.79903e+07	5.9482e+07	4.81049e+07	6.36489e+07	6.44068e+07	6.06104e+07	1.1871e+08	4.42453e+07	4.85367e+07	High	High	High	High	High	High
Master Protein	I1MVZ2	WD_REPEATS_REGION domain-containing protein OS=Glycine max OX=3847 GN=100804284 PE=4 SV=2	0	310.886	32	37	181	6	1622	176.5	8.27	371.37	37	17	0	2.093	2.005	1.068	1.205	1.324	0.894	0.587677	0.873628	0.929248	0.620765	0.86823	0.984391	43.6	85.1	148.6	122.7	1.44592e+06	1.21924e+06	2.57824e+06	3.31991e+06	2.82298e+06	2.50733e+06	2.75053e+06	5.35221e+06	4.92955e+06	6.35984e+06	4.07219e+06	3.92746e+06	High	Peak Found	High	High	Peak Found	Peak Found
Master Protein	K7MTE4	CoA carboxyltransferase C-terminal domain-containing protein OS=Glycine max OX=3847 GN=GLYMA_18G196000 PE=3 SV=1	0	310.151	55	30	247	7	683	75.9	8.81	669.74	30	18	23	1.244	1.434	0.792	1.005	1.236	0.787	0.992687	0.949676	0.986228	0.99582	0.86144	0.810782	98.1	95.3	98.7	107.9	1.51216e+08	1.22035e+08	1.34158e+08	1.30299e+08	1.38245e+08	1.30243e+08	1.04233e+08	1.35001e+08	1.36543e+08	9.36439e+07	1.47466e+08	1.50304e+08	High	High	High	High	High	High
Master Protein	I1LP98	Uncharacterized protein OS=Glycine max OX=3847 GN=100790764 PE=4 SV=1	0	310.053	52	28	354	9	688	77.4	9.11	857.07	28	12	0	1.429	2.063	0.72	0.949	1.195	0.892	0.931191	0.850889	0.942924	0.987496	0.915525	0.982511	57.8	90	97.7	154.5	1.62219e+07	1.28215e+07	9.99618e+06	1.90995e+07	2.29479e+07	1.9953e+07	3.83024e+07	1.83919e+07	2.16698e+07	2.34863e+07	3.42602e+07	3.56959e+07	High	High	High	High	High	High
Master Protein	I1MM85	Uncharacterized protein OS=Glycine max OX=3847 GN=100800696 PE=3 SV=1	0	309.969	57	24	361	13	523	58.5	6.73	948.53	24	16	0	1.128	1.219	0.841	0.987	1.035	0.958	0.975481	0.986781	0.999879	0.999987	0.996877	0.995456	113.6	101.3	102	83.2	3.41826e+07	2.6205e+07	1.29168e+08	1.2307e+08	3.04927e+07	2.87083e+07	3.81836e+07	2.58372e+07	3.0696e+07	2.36417e+07	2.50313e+07	3.04226e+07	High	High	High	High	High	High
Master Protein	I1KGB8	Uncharacterized protein OS=Glycine max OX=3847 GN=100787285 PE=3 SV=1	0	309.396	57	29	263	10	574	61.1	7.5	660.4	29	7	18	1.067	1.382	0.957	0.982	1.182	0.847	0.942381	0.970352	0.940752	0.998636	0.924113	0.950944	100.1	93.6	98.9	107.5	8.42582e+07	7.03094e+07	6.94151e+07	5.98627e+07	8.47123e+07	6.5773e+07	7.16222e+07	6.21422e+07	6.94763e+07	6.80389e+07	7.55293e+07	8.60577e+07	High	High	High	High	High	High
Master Protein	Q39833	Alfa-carboxyltransferase OS=Glycine max OX=3847 GN=accA-2 PE=2 SV=1	0	308.639	54	29	263	5	690	76.9	8.51	698.75	29	18	2	1.046	1.222	0.923	0.975	1.188	0.811	0.94041	0.982213	0.960104	0.997086	0.929381	0.919741	89.1	96.9	90.7	123.3	1.82576e+07	1.64005e+07	1.65487e+07	1.79861e+07	2.02895e+07	1.64919e+07	1.47137e+07	1.68446e+07	2.02396e+07	1.31904e+07	2.28976e+07	2.49175e+07	High	High	High	High	High	High
Master Protein	I1KPN2	Importin N-terminal domain-containing protein OS=Glycine max OX=3847 GN=100818831 PE=4 SV=1	0	308.303	39	21	142	1	870	96.3	4.78	422	21	8	19	1.492	2.21	0.88	1.226	1.826	0.667	0.90604	0.794116	0.986228	0.374493	0.0649809	0.521302	83.8	78.1	105.6	132.5	1.61249e+07	1.5634e+07	1.77924e+07	1.77589e+07	1.50265e+07	1.32599e+07	1.79051e+07	2.03203e+07	2.10105e+07	5.78191e+07	1.99401e+07	2.54994e+07	Peak Found	Not Found	Not Found	Peak Found	Peak Found	Peak Found
Master Protein	I1M137	Uncharacterized protein OS=Glycine max OX=3847 GN=GLYMA_13G207900 PE=3 SV=1	0	308.129	61	24	291	24	601	64.1	6.11	815.65	24	13	0	0.84	0.866	1.057	0.934	0.93	0.999	0.688569	0.833787	0.857668	0.967018	0.92482	0.975139	117.4	100.3	93.3	89	1.41958e+08	1.46518e+08	1.53333e+08	1.33206e+08	1.23553e+08	1.25212e+08	1.21453e+08	1.15032e+08	1.16479e+08	1.08211e+08	1.11131e+08	1.12802e+08	High	High	High	High	High	High
Master Protein	A0A0R0FQN0	Aspartate aminotransferase OS=Glycine max OX=3847 GN=547792 PE=4 SV=1	0	307.4	70	24	320	5	463	50.6	8.18	810.64	24	17	21	1.145	1.127	0.874	1.11	0.942	1.173	0.981869	0.967593	0.988014	0.76854	0.938505	0.698575	99.8	92.1	109.4	98.7	1.56113e+08	1.34015e+08	1.39183e+08	1.40823e+08	1.2844e+08	1.23035e+08	1.81227e+08	1.35467e+08	1.52581e+08	1.06731e+08	1.37592e+08	1.39403e+08	High	High	High	High	High	High
Master Protein	C6TDZ0	Glutamate dehydrogenase OS=Glycine max OX=3847 GN=100789509 PE=2 SV=1	0	307.247	64	18	261	3	411	44.5	6.4	807.16	18	19	18	0.994	1.521	0.762	0.753	1.255	0.591	0.887023	0.930179	0.963034	0.0934306	0.826458	0.0924732	82.6	95.2	75	147.2	1.82774e+08	1.12383e+08	2.14624e+08	2.09416e+08	2.10597e+08	3.02512e+08	1.50447e+08	2.21493e+08	1.65873e+08	3.44661e+08	3.25617e+08	2.49303e+08	High	High	High	Peak Found	High	High
Master Protein	I1KQX5	Uncharacterized protein OS=Glycine max OX=3847 GN=100785014 PE=3 SV=1	0	306.593	58	34	266	9	814	89.4	6.81	599.33	34	8	9	1.183	1.422	0.757	0.906	1.03	0.879	0.997285	0.973514	0.972119	0.92961	0.994549	0.978544	86.1	83	95.9	135.1	1.51095e+07	1.27527e+07	1.24724e+07	1.22942e+07	1.37395e+07	1.08236e+07	1.42941e+07	1.30654e+07	1.42025e+07	2.1809e+07	1.42754e+07	2.00144e+07	High	High	High	High	High	High
Master Protein	I1KXM1	Pyruvate dehydrogenase E1 component subunit alpha OS=Glycine max OX=3847 GN=100781250 PE=4 SV=1	0	306.577	49	20	376	8	394	43.6	7.43	1022.11	20	8	14	1.856	1.568	0.533	1.007	1.113	0.887	0.578091	0.916317	0.508789	0.994937	0.96582	0.979794	117.3	87.1	96	99.6	2.68274e+08	2.46823e+08	2.65685e+08	2.2284e+08	1.97144e+08	1.9727e+08	2.07913e+08	2.50576e+08	2.17318e+08	2.39649e+08	2.2543e+08	2.15319e+08	High	High	High	High	High	High
Master Protein	I1K5H2	26S proteasome non-ATPase regulatory subunit 1 homolog OS=Glycine max OX=3847 GN=100790425 PE=3 SV=1	0	306.543	37	26	239	5	1006	109.4	5.29	613.09	26	5	0	5.864	9.253	0.222	1.153	1.792	0.625	0.00256828	0.00253755	0.00780825	0.73878	0.0883209	0.244163	33.7	82.4	100.2	183.8	3.09267e+06	3.24323e+06	2.33304e+06	7.56581e+06	8.92128e+06	7.26428e+06	8.74738e+06	9.20525e+06	9.69447e+06	2.06466e+07	8.78691e+06	1.68833e+07	High	High	High	High	High	High
Master Protein	A0A0R4J2P9	Cysteine synthase OS=Glycine max OX=3847 GN=100815330 PE=3 SV=1	0	306.203	69	17	213	4	394	41.6	7.31	665.89	17	2	13	1.035	1.039	1.156	1.141	1.106	1.02	0.920421	0.937764	0.735485	0.639483	0.970772	0.956645	118.7	88	100.2	93.2	1.39026e+08	1.18526e+08	1.41802e+08	1.03004e+08	1.1654e+08	9.46459e+07	9.86449e+07	1.17318e+08	1.31497e+08	1.20942e+08	1.0828e+08	1.09111e+08	High	High	High	High	High	High
Master Protein	I1L4J2	Uncharacterized protein OS=Glycine max OX=3847 GN=100798079 PE=3 SV=1	0	306.047	54	28	274	9	724	78.1	9.2	711.01	28	9	0	1.157	1.51	0.824	0.991	1.169	0.792	0.985559	0.965845	0.999879	0.996239	0.94224	0.891258	82.9	93.7	102.3	121.1	1.29505e+07	2.01081e+07	1.41726e+07	1.80871e+07	1.6005e+07	1.277e+07	1.74707e+07	1.83578e+07	1.40484e+07	3.24133e+07	2.06951e+07	1.64235e+07	High	High	High	High	High	High
Master Protein	I1L0D9	Peroxidase OS=Glycine max OX=3847 GN=GLYMA_09G023000 PE=3 SV=1	0	306.017	64	18	1340	14	349	38	7.3	3024.37	18	9	6	1.23	1.098	0.794	0.937	0.868	1.103	0.997285	0.960385	0.986228	0.967018	0.813792	0.846356	139.5	102	90.5	68	4.42273e+09	5.60395e+09	6.21623e+09	5.11462e+09	3.69819e+09	4.0997e+09	3.63429e+09	4.40415e+09	3.25827e+09	2.73392e+09	3.5109e+09	2.64509e+09	High	High	High	High	High	High
Master Protein	I1LYP8	NmrA domain-containing protein OS=Glycine max OX=3847 GN=100796585 PE=4 SV=1	0	305.763	67	21	275	21	396	43.8	9.2	772.87	21	13	0	1.142	1.195	0.903	0.982	1.016	0.982	0.980972	0.989273	0.976907	0.997086	0.988464	0.982511	107.3	102.6	103.7	86.3	1.61099e+08	1.66022e+08	1.64107e+08	1.56846e+08	1.90868e+08	1.21353e+08	1.58581e+08	1.75461e+08	1.33169e+08	1.31986e+08	1.55409e+08	1.21714e+08	High	High	High	High	High	High
Master Protein	P02581	Actin-1 OS=Glycine max OX=3847 GN=SAC1 PE=3 SV=2	0	305.252	45	11	757	1	377	41.3	5.58	1914.85	11		0	8.456	8.57	1.508	6.664	13.104	1.121	0.0122871	0.0833796	0.759715	8.26842e-14	3.67131e-13	0.910617	34	10.7	64	291.4	55438.7	443939	343327	294458	70348.1	107725	4.32657e+06	468791	645985	3.85869e+06	218240	2.94247e+06	Peak Found	Peak Found	Peak Found	Peak Found	Peak Found	Peak Found
Master Protein	K7MLF2	AAA domain-containing protein OS=Glycine max OX=3847 GN=100816731 PE=4 SV=1	0	304.805	38	31	204	6	1224	132.6	6.61	467.88	31	17	14	0.899	0.807	0.903	0.818	0.796	1.032	0.856696	0.837714	0.978725	0.580157	0.603332	0.934063	111.2	114.6	87.5	86.7	1.61227e+07	1.79605e+07	1.38054e+07	1.75607e+07	1.66104e+07	1.43105e+07	1.09124e+07	1.35947e+07	1.26793e+07	5.87045e+06	1.28496e+07	1.25604e+07	High	High	High	High	High	High
Master Protein	I1JUT9	EMC1_C domain-containing protein OS=Glycine max OX=3847 GN=100807708 PE=4 SV=1	0	304.205	44	32	183	9	983	110.3	7.05	407.08	32	4	0	1.16	1.383	0.931	1.08	1.341	0.884	0.994304	0.970569	0.986228	0.92792	0.792469	0.982511	107	96	99.1	98	4.74766e+06	7.37914e+06	7.63762e+06	7.23165e+06	6.62338e+06	6.55162e+06	4.31435e+06	6.83416e+06	6.89294e+06	1.26979e+07	6.75759e+06	3.95644e+06	High	High	High	High	High	High
Master Protein	A0A368UKJ9	Pyruvate kinase OS=Glycine max OX=3847 GN=GLYMA_09G126300 PE=3 SV=1	0	304.12	50	21	265	3	577	63.3	7.59	700.19	21		0	1.001	0.643	1.425	1.045	0.928	1.14	0.935994	0.6836	0.635562	0.967859	0.951294	0.839029	158.4	96.9	72.6	72.1	7.66154e+06	8.829e+06	8.47116e+06	5.18268e+06	5.66049e+06	4.21782e+06	3.88394e+06	1.7667e+06	4.5675e+06	3.85666e+06	4.96219e+06	2.01501e+06	High	High	High	High	High	High
Master Protein	I1KUQ3	Lipoxygenase OS=Glycine max OX=3847 GN=100815477 PE=3 SV=1	0	304.11	42	29	231	10	867	97.7	6	559.75	29	8	14	2.3	2.573	0.479	1.027	1.136	0.888	0.286193	0.555621	0.393892	0.969403	0.963982	0.982511	58	111	123.6	107.4	2.84098e+07	2.59623e+07	2.45252e+07	4.97066e+07	4.4086e+07	6.90526e+07	9.56138e+07	4.1419e+07	5.53624e+07	1.01391e+08	3.60877e+07	4.81044e+07	High	High	Peak Found	High	High	High
Master Protein	I1KM07	Uncharacterized protein OS=Glycine max OX=3847 GN=100777651 PE=4 SV=1	0	303.624	65	25	210	4	556	60	8.73	652.16	25	7	20	1.491	1.793	0.625	0.878	1.13	0.744	0.87391	0.853863	0.80736	0.768526	0.963895	0.725677	86.7	106.4	90.2	116.8	4.53454e+07	4.34168e+07	5.87146e+07	5.46927e+07	5.56371e+07	6.30055e+07	4.54553e+07	6.64987e+07	4.71681e+07	6.45008e+07	6.03637e+07	6.11075e+07	High	High	High	High	High	High
Master Protein	I1LLZ2	AAA domain-containing protein OS=Glycine max OX=3847 GN=100820353 PE=3 SV=1	0	303.566	75	23	298	6	413	46.4	5.85	840.57	23	11	0	1.142	1.175	0.954	0.926	1.089	0.844	0.984855	0.975279	0.959835	0.967018	0.985347	0.956645	82.6	115.4	98.8	103.2	1.18719e+07	1.25138e+07	7.39012e+06	1.56817e+07	1.65839e+07	1.69669e+07	1.41906e+07	1.39487e+07	1.50777e+07	1.48199e+07	1.4728e+07	1.72127e+07	High	High	High	High	High	High
Master Protein	I1MUN6	Uncharacterized protein OS=Glycine max OX=3847 GN=100816038 PE=3 SV=1	0	303.337	60	28	335	4	477	52.5	7.18	792.99	28	17	6	0.959	0.839	1.073	1.019	0.992	0.95	0.871142	0.821451	0.861743	0.989478	0.979383	0.997906	117.7	96.3	101.7	84.3	3.95904e+07	4.38759e+07	3.88816e+07	3.90409e+07	3.18392e+07	3.24073e+07	2.71811e+07	3.76274e+07	3.42316e+07	2.83595e+07	3.14646e+07	2.6314e+07	High	High	Peak Found	High	High	High
Master Protein	I1LIV5	FAD-binding PCMH-type domain-containing protein OS=Glycine max OX=3847 GN=100791799 PE=4 SV=1	0	303.198	55	24	203	6	567	66	8.21	507.41	24	11	20	1.361	2.581	0.786	1.192	1.657	0.708	0.946065	0.509293	0.977789	0.357138	0.172928	0.573921	79.7	94.1	103.6	122.7	3.69664e+07	4.47758e+07	3.81573e+07	4.50581e+07	4.77114e+07	3.52711e+07	4.95896e+07	4.76133e+07	5.66364e+07	1.3979e+08	5.87372e+07	5.1301e+07	High	High	High	High	High	High
Master Protein	I1KR53	Fn3_like domain-containing protein OS=Glycine max OX=3847 GN=100786744 PE=4 SV=1	0	303.028	47	26	185	23	765	82.5	7.66	550.15	26	8	3	1.241	1.149	0.816	0.974	0.863	1.05	0.992687	0.970166	0.990068	0.996239	0.802255	0.933071	86.3	112.2	104.1	97.5	4.77191e+07	4.10149e+07	3.39565e+07	4.41184e+07	5.33101e+07	5.53949e+07	4.94544e+07	4.65425e+07	5.59594e+07	4.63362e+07	4.57406e+07	5.94622e+07	High	High	High	High	High	High
Master Protein	P29756	Catalase-1/2 OS=Glycine max OX=3847 GN=CAT1 PE=2 SV=1	0	302.497	59	20	377	1	492	56.8	7.27	1001.75	20	17	0	2.602	3.046	0.382	1.012	1.25	0.854	0.34408	0.463038	0.234007	0.996018	0.899215	0.960526	43.2	112.9	112.4	131.5	5.47863e+06	4.01231e+06	2.13031e+06	6.75519e+06	1.04932e+07	1.16315e+07	1.17713e+07	8.00427e+06	1.044e+07	8.44339e+06	1.22201e+07	1.653e+07	High	High	High	High	High	High
Master Protein	K7KQG4	Uncharacterized protein OS=Glycine max OX=3847 GN=GLYMA_05G156900 PE=4 SV=1	0	301.984	61	25	185	2	705	78.2	4.83	515.75	25	5	0	2.527	4.268	0.472	1.323	1.534	0.822	0.682803	0.571988	0.81702	0.658695	0.811515	0.982511	70.4	106.4	107.4	115.8	104789	408207	330463	589381	361160	499651	248874	504045	625811	2.22245e+06	540331	543738	Peak Found	High	High	Peak Found	Peak Found	Peak Found
Master Protein	I1KJQ5	Eukaryotic translation initiation factor 3 subunit B OS=Glycine max OX=3847 GN=100817394 PE=3 SV=1	0	301.923	55	29	202	6	718	82.6	5.25	467.35	29	7	22	1.743	2.143	0.558	1.068	1.483	0.737	0.684165	0.6861	0.621658	0.906675	0.373097	0.690243	51.3	86.3	119.6	142.9	3.03301e+07	3.33225e+07	5.3404e+07	5.55519e+07	5.60371e+07	1.19284e+08	5.46912e+07	7.76792e+07	9.14833e+07	7.79747e+07	9.4074e+07	9.28056e+07	Peak Found	High	High	High	High	High
Master Protein	A0A0R0GSM7	USP domain-containing protein OS=Glycine max OX=3847 GN=GLYMA_13G027800 PE=4 SV=1	0	301.838	50	32	239	3	677	79.9	5.82	564.86	32	13	0	0.852	1.026	1.217	1.092	0.974	0.993	0.871644	0.954831	0.795285	0.918042	0.977908	0.982511	112.5	94.9	89.7	102.9	4.25331e+06	3.84099e+06	4.28888e+06	4.37842e+06	3.59034e+06	3.513e+06	3.39272e+06	2.69376e+06	4.13966e+06	6.58398e+06	2.86736e+06	3.88996e+06	High	High	Peak Found	High	High	High
Master Protein	I1NG28	EGF_CA domain-containing protein OS=Glycine max OX=3847 GN=100776184 PE=4 SV=1	0	301.751	61	27	232	7	631	69.8	5.6	581.4	27	20	20	1.056	1.007	0.862	0.899	0.87	1.042	0.935994	0.928589	0.995512	0.88071	0.818426	0.932779	98.8	111.6	102	87.7	1.09025e+08	9.99262e+07	1.01164e+08	1.14309e+08	1.04776e+08	1.31017e+08	1.04445e+08	9.40577e+07	1.08205e+08	7.19002e+07	9.84613e+07	8.97976e+07	High	High	High	High	High	High
Master Protein	I1K7A1	Dolichyl-diphosphooligosaccharide--protein glycosyltransferase subunit 1 OS=Glycine max OX=3847 GN=100817203 PE=3 SV=1	0	301.603	51	23	247	11	613	68.4	7.08	746.52	23	6	12	1.257	1.245	0.714	0.882	0.876	0.994	0.988608	0.999851	0.925478	0.795171	0.825235	0.97601	95.5	115.2	97.6	91.7	5.69873e+07	6.32643e+07	6.12959e+07	7.15685e+07	7.43729e+07	7.39674e+07	1.09019e+08	6.26621e+07	6.09848e+07	7.33335e+07	5.8882e+07	4.6648e+07	High	High	High	High	High	High
Master Protein	I1JC08	AA_TRNA_LIGASE_II domain-containing protein OS=Glycine max OX=3847 GN=100802879 PE=3 SV=1	0	301.339	57	39	331	12	710	81.8	7.21	655.43	39	2	27	1.787	2.822	0.502	0.943	1.299	0.723	0.648038	0.37376	0.411336	0.976957	0.746598	0.601666	84.9	94.9	97.1	123.1	9.39041e+07	7.40221e+07	6.75225e+07	7.83099e+07	1.01331e+08	8.27407e+07	7.28073e+07	8.46165e+07	8.86574e+07	1.26984e+08	9.71006e+07	1.07311e+08	High	High	High	High	High	High
Master Protein	C6TNT2	EF1Bgamma class glutathione S-transferase OS=Glycine max OX=3847 GN=EF1Bgamma3 PE=2 SV=1	0	301.148	56	21	410	6	419	47.6	6.24	1035.98	21	16	1	1.387	2.259	0.777	1.059	1.464	0.809	0.94094	0.662716	0.97794	0.928966	0.489037	0.89555	67.7	82.8	94	155.5	3.45992e+07	2.94642e+07	3.24414e+07	3.87103e+07	4.06524e+07	3.96394e+07	6.19655e+07	3.77595e+07	4.501e+07	6.10176e+07	7.45003e+07	8.04504e+07	High	High	High	High	High	High
Master Protein	Q93XE6	Chalcone--flavonone isomerase 1A OS=Glycine max OX=3847 GN=CHI1A PE=2 SV=1	0	300.906	82	15	460	14	218	23.3	6.7	1245.19	15	20	1	1.032	1.043	1.021	0.982	0.918	1.219	0.917628	0.939854	0.886067	0.997086	0.916093	0.584998	131.4	96.7	95.4	76.4	7.88041e+08	7.23303e+08	7.51023e+08	5.91719e+08	5.47647e+08	5.52812e+08	6.11868e+08	4.98765e+08	5.4511e+08	4.91794e+08	4.32534e+08	4.36751e+08	High	High	High	High	High	High
Master Protein	I1KTW9	IMPDH domain-containing protein OS=Glycine max OX=3847 GN=GLYMA_08G164100 PE=4 SV=1	0	300.89	73	16	207	3	335	35.6	7.91	618.42	16	8	0	1.277	1.402	0.881	1.045	1.099	1.008	0.982725	0.974561	0.979243	0.96605	0.973579	0.973791	72.8	95.6	113.6	118	26341776	2.22178e+07	2.34808e+07	2.27236e+07	3.08284e+07	3.29546e+07	3.23563e+07	4.42461e+07	3.66372e+07	3.80413e+07	4.5303e+07	2.99962e+07	High	High	High	High	High	High
Master Protein	A0A368UHI2	Uncharacterized protein OS=Glycine max OX=3847 GN=GLYMA_12G166200 PE=3 SV=1	0	300.458	52	21	319	2	543	57.7	5.33	967.73	21		0	1.343	1.11	0.771	1.128	0.807	1.694	0.961298	0.979183	0.96634	0.820135	0.782425	0.04453	87.1	101.9	130.4	80.6	4.35539e+06	3.71073e+06	5.9336e+06	5.0975e+06	5.32289e+06	4.65238e+06	6.51936e+06	5.53568e+06	6.54421e+06	5.93823e+06	4.03328e+06	2.09108e+06	High	High	High	High	High	High
Master Protein	A0A0R0H289	Serine hydroxymethyltransferase OS=Glycine max OX=3847 GN=100305381 PE=3 SV=1	0	300.304	69	24	295	24	527	57.3	7.56	755.66	24	13	0	1.672	2.16	0.659	1.024	1.238	0.813	0.752792	0.628825	0.841386	0.981606	0.85774	0.881366	96.9	101.3	92.7	109.1	1.44444e+08	1.27506e+08	1.53877e+08	1.5102e+08	1.40324e+08	1.60728e+08	1.1918e+08	1.80933e+08	1.38291e+08	1.7097e+08	1.62723e+08	1.48486e+08	High	High	High	High	High	High
Master Protein	C6TIM5	Ferredoxin--NADP reductase, chloroplastic OS=Glycine max OX=3847 GN=100807968 PE=2 SV=1	0	300.128	58	21	422	5	377	42.2	8.32	932.69	21	15	19	2.96	3.007	0.349	0.978	1.074	0.923	0.0423194	0.232114	0.0305052	0.996297	0.991287	0.995456	75.6	104.6	114.5	105.2	2.96203e+08	3.18531e+08	3.41501e+08	4.16429e+08	4.40389e+08	5.29152e+08	3.96835e+08	4.82328e+08	4.87421e+08	3.75789e+08	4.43226e+08	4.81303e+08	High	High	High	High	High	High
Master Protein	K7KMT9	Elongation factor Tu OS=Glycine max OX=3847 GN=GLYMA_05G041900 PE=3 SV=1	0	298.975	56	19	242	9	479	52.5	6.81	681.63	19	5	9	1.244	1.533	0.786	1.037	1.256	0.819	0.992687	0.936139	0.980093	0.967018	0.824544	0.910791	104.4	94.8	98.8	102.1	8.87679e+07	7.87565e+07	8.84062e+07	9.09591e+07	8.02923e+07	7.75088e+07	6.30406e+07	9.85636e+07	8.36852e+07	8.64489e+07	9.61088e+07	8.00632e+07	High	High	High	High	High	High
Master Protein	I1L7W4	AAA domain-containing protein OS=Glycine max OX=3847 GN=106794125 PE=4 SV=2	0	298.613	34	29	170	9	1247	135.2	7.11	360.4	29	10	11	0.819	0.836	0.945	0.8	0.859	0.968	0.728269	0.827579	0.930576	0.441336	0.823546	0.983378	97.9	109.3	94.7	98.1	1.89791e+07	2.23837e+07	1.96049e+07	3.20796e+07	1.95528e+07	2.18979e+07	1.93514e+07	1.89672e+07	1.55128e+07	1.96452e+07	1.85523e+07	2.1312e+07	High	High	High	High	High	High
Master Protein	I1JIH4	Uncharacterized protein OS=Glycine max OX=3847 GN=100811253 PE=3 SV=1	0	298.464	65	20	195	4	438	47.8	5.48	658.18	20	2	0	0.775	0.735	1.175	0.936	0.909	0.985	0.648357	0.709813	0.69327	0.977267	0.915525	0.982511	105.8	102.6	88.6	103.1	2.76363e+07	2.60933e+07	2.44185e+07	2.53035e+07	2.64181e+07	2.41952e+07	2.18476e+07	2.07747e+07	2.67493e+07	1.56264e+07	2.54185e+07	2.76484e+07	High	High	High	High	High	High
Master Protein	I1M9F7	Aspartate aminotransferase OS=Glycine max OX=3847 GN=100811514 PE=4 SV=1	0	298.415	71	23	307	4	463	50.6	7.9	777.27	23	14	0	1.775	1.618	0.623	1.032	0.937	1.117	0.804338	0.928589	0.852207	0.987965	0.933563	0.811062	65.4	109.4	124.3	100.9	7.25738e+06	6.1667e+06	5.15709e+06	1.03065e+07	9.03654e+06	1.14257e+07	1.17177e+07	8.94071e+06	1.22583e+07	6.86579e+06	9.50803e+06	1.38834e+07	High	High	High	High	High	High
Master Protein	A0A0R0F1N7	CoA carboxyltransferase C-terminal domain-containing protein OS=Glycine max OX=3847 GN=547859 PE=3 SV=1	0	298.271	50	26	216	3	709	78.6	7.83	616.8	26	18	1	1.479	1.666	0.709	0.896	1.289	0.755	0.90483	0.916317	0.926385	0.929494	0.853962	0.812485	101	91.7	80.7	126.6	6.47182e+06	6.09888e+06	3.79193e+06	4.35158e+06	7.81112e+06	5.53778e+06	4.56807e+06	4.87235e+06	7.34483e+06	1.69404e+06	9.37299e+06	7.64666e+06	High	High	High	Peak Found	High	High
Master Protein	I1KQE8	26S proteasome non-ATPase regulatory subunit 1 homolog OS=Glycine max OX=3847 GN=100817941 PE=3 SV=1	0	298.02	37	28	245	7	1006	109.5	5.36	606.82	28	8	22	2.51	3.119	0.468	1.115	1.476	0.728	0.156805	0.318011	0.337538	0.704328	0.393691	0.662597	58.3	96.8	107.1	137.8	2.79515e+07	3.15443e+07	3.79264e+07	5.13703e+07	5.79727e+07	5.23159e+07	4.88741e+07	6.80744e+07	5.79148e+07	1.16502e+08	6.16581e+07	7.44982e+07	High	High	High	High	High	High
Master Protein	I1LTQ5	AP-2 complex subunit alpha OS=Glycine max OX=3847 GN=100793930 PE=3 SV=1	0	297.782	43	35	195	7	1020	113.7	6.25	496.38	35	12	27	1.741	1.714	0.672	1.103	1.261	0.829	0.702235	0.886571	0.882558	0.754537	0.860937	0.928728	72.5	96.8	106.2	124.5	2.7706e+07	3.63065e+07	3.96413e+07	4.96419e+07	4.84837e+07	4.44319e+07	5.31596e+07	6.076e+07	5.05983e+07	7.39394e+07	5.08543e+07	6.23596e+07	High	High	High	High	High	High
Master Protein	I1LPD3	Beta-adaptin-like protein OS=Glycine max OX=3847 GN=100784577 PE=3 SV=2	0	297.662	45	28	188	7	898	99.9	5.08	472.3	28	12	0	0.771	0.913	1.14	1.132	1.055	1.035	0.792417	0.934359	0.883173	0.803246	0.998905	0.969294	132.6	89.2	111.8	66.5	3.86854e+06	9.38513e+06	5.49904e+06	7.41245e+06	3.61232e+06	3.69998e+06	2.68953e+06	4.63712e+06	6.03731e+06	2.30549e+06	2.82236e+06	2.75696e+06	High	High	High	High	High	High
Master Protein	A0A0R0G3L8	Phospho-2-dehydro-3-deoxyheptonate aldolase OS=Glycine max OX=3847 GN=100789764 PE=3 SV=1	0	297.541	63	20	262	15	495	54.9	8.28	674.34	20	15	0	1.022	0.588	1.156	1.141	0.831	1.417	0.910156	0.4639	0.777767	0.615047	0.739556	0.193506	128.4	89.3	107.4	74.9	5.84841e+07	4.97023e+07	5.67852e+07	5.89146e+07	3.77424e+07	3.94984e+07	4.09111e+07	4.75039e+07	5.25939e+07	3.32598e+07	3.3148e+07	2.72198e+07	High	High	High	High	High	High
Master Protein	O48561	Catalase-4 OS=Glycine max OX=3847 GN=CAT4 PE=2 SV=1	0	297.482	56	22	379	3	492	56.7	7.28	955.12	22	4	20	1.918	2.614	0.645	0.999	1.483	0.652	0.527144	0.384553	0.812437	0.996239	0.370489	0.282824	93.7	91.4	98.9	116.1	2.18667e+08	2.16951e+08	2.34911e+08	2.11907e+08	2.13349e+08	2.61301e+08	1.89705e+08	2.76193e+08	2.3083e+08	2.71119e+08	3.06741e+08	2.40289e+08	High	High	High	High	High	High
Master Protein	Q09WE7	UDP-sugar pyrophosphorylase 1 OS=Glycine max OX=3847 GN=USP1 PE=1 SV=1	0	297.408	59	25	268	8	600	66.1	6.01	708.46	25	4	17	1.842	2.558	0.628	0.996	1.061	0.914	0.593507	0.464583	0.813349	0.996018	0.996945	0.997089	80.4	95.2	101.5	122.9	5.40009e+07	5.29908e+07	4.86966e+07	6.01498e+07	6.27343e+07	6.57248e+07	9.16881e+07	5.88655e+07	6.69352e+07	1.02768e+08	8.10524e+07	7.01207e+07	High	High	High	High	High	High
Master Protein	I1L7Z5	Peroxidase OS=Glycine max OX=3847 GN=100799691 PE=3 SV=2	0	297.213	66	15	388	7	322	35.1	6.3	891.19	15	10	6	0.96	1.009	0.979	0.898	0.908	0.978	0.861892	0.928481	0.924823	0.873165	0.90389	0.982511	127.9	107.9	77.2	86.9	9.25532e+07	1.28535e+08	1.48507e+08	1.08448e+08	7.97999e+07	1.31742e+08	1.39892e+08	7.26315e+07	7.75576e+07	7.80358e+07	8.88968e+07	8.73065e+07	High	High	High	High	High	High
Master Protein	I1K9N4	Glucose-6-phosphate isomerase OS=Glycine max OX=3847 GN=100818441 PE=3 SV=1	0	297.109	65	32	312	6	615	67.4	5.73	685.46	32	6	2	1.034	0.854	0.96	1.003	0.835	1.168	0.942724	0.867693	0.958595	0.996239	0.793776	0.675083	107.2	103.6	111.3	77.9	1.08475e+07	6.96197e+06	9.37547e+06	9.06056e+06	9.28559e+06	8.59086e+06	9.73735e+06	1.30651e+07	8.64414e+06	5.73376e+06	6.81659e+06	1.20709e+07	High	High	High	High	High	High
Master Protein	I1N462	Subtilisin-like protease Glyma18g48580 OS=Glycine max OX=3847 GN=Glyma18g48580 PE=1 SV=3	0	297.106	37	20	266	18	789	85	9.36	739.53	20		1	1.383	1.314	0.788	1.039	0.901	1.119	0.935994	0.983109	0.98251	0.967018	0.892245	0.811062	102.1	107.2	110.5	80.2	1.30611e+08	1.24782e+08	1.51675e+08	1.19612e+08	1.37126e+08	1.76866e+08	1.41449e+08	1.10388e+08	1.63818e+08	7.58341e+07	1.47972e+08	1.02676e+08	High	High	High	High	High	High
Master Protein	A0A0R4J2N2	Uncharacterized protein OS=Glycine max OX=3847 GN=100810850 PE=3 SV=1	0	296.982	57	18	284	7	495	53.3	8.47	941.17	18	2	11	1.409	1.739	0.761	1.029	1.111	0.926	0.921701	0.857875	0.962216	0.973743	0.966604	0.997603	98.7	93.1	100.7	107.6	1.4776e+08	1.47041e+08	1.42185e+08	1.31608e+08	1.77069e+08	1.38752e+08	1.41135e+08	1.67638e+08	1.50057e+08	1.6031e+08	1.61334e+08	1.57782e+08	High	High	High	High	High	High
Master Protein	O48560	Catalase-3 OS=Glycine max OX=3847 GN=CAT3 PE=2 SV=1	0	296.683	59	20	358	2	492	56.9	7.25	980.42	20	14	9	1.251	1.368	0.773	0.94	1.075	0.824	0.991101	0.967593	0.97071	0.967859	0.991287	0.905221	100.7	100.3	93.2	105.9	1.15372e+08	1.03495e+08	1.49454e+08	1.04836e+08	1.14944e+08	1.16758e+08	8.34744e+07	1.31307e+08	1.06837e+08	1.24648e+08	1.21341e+08	9.47557e+07	High	High	High	High	High	High
Master Protein	I1NJ39	Uncharacterized protein OS=Glycine max OX=3847 GN=100793575 PE=4 SV=2	0	296.613	43	38	265	4	1130	124.7	7.34	568.38	38	20	30	1.743	2.269	0.576	0.977	1.171	0.804	0.723234	0.649795	0.691457	0.997086	0.944616	0.866887	85.7	105.4	95.8	113.1	2.82753e+07	3.37724e+07	3.75544e+07	4.15501e+07	4.49067e+07	3.93794e+07	3.6802e+07	5.09294e+07	3.77472e+07	4.95131e+07	3.81559e+07	4.45501e+07	High	High	High	Peak Found	Peak Found	Peak Found
Master Protein	I1LG61	Beta-adaptin-like protein OS=Glycine max OX=3847 GN=100807007 PE=3 SV=1	0	296.355	47	29	192	5	898	99.9	5.1	507.62	29	11	24	1.501	1.531	0.727	1.187	1.3	0.827	0.87391	0.935676	0.933813	0.370002	0.795007	0.92991	83.1	88	111.4	117.4	3.33428e+07	4.03539e+07	4.77538e+07	4.54163e+07	4.27432e+07	3.64377e+07	3.74578e+07	5.89053e+07	5.40911e+07	7.94586e+07	4.3188e+07	5.70239e+07	High	High	High	High	High	High
Master Protein	A0A0R0I2M6	Peroxidase OS=Glycine max OX=3847 GN=GLYMA_09G022400 PE=3 SV=1	0	296.274	61	16	688	5	355	38.5	6.04	1654.41	16	9	11	1.403	1.185	0.686	0.986	0.785	1.289	0.925892	0.986763	0.883173	0.999252	0.541237	0.410749	111.9	108.9	114.3	64.8	1.81578e+09	1.83691e+09	2.15885e+09	2.11011e+09	1.49046e+09	1.7877e+09	1.87609e+09	1.93259e+09	1.63178e+09	1.05166e+09	1.36889e+09	1.06316e+09	High	High	High	High	High	High
Master Protein	I1M1V8	Uncharacterized protein OS=Glycine max OX=3847 GN=100809553 PE=3 SV=1	0	296.035	60	22	210	21	589	63.4	6.11	638.95	22	13	1	1.534	1.595	0.584	0.981	0.937	1.16	0.855787	0.923051	0.706497	0.999252	0.926031	0.752379	75.3	111.6	108.5	104.6	3.78564e+07	4.22094e+07	2.95039e+07	5.61332e+07	5.79364e+07	5.05152e+07	1.61078e+08	4.03375e+07	5.4572e+07	6.84949e+07	4.43264e+07	5.26323e+07	High	High	High	High	High	High
Master Protein	I1JC65	Aminotran_1_2 domain-containing protein OS=Glycine max OX=3847 GN=100787173 PE=4 SV=1	0	295.461	62	22	268	7	481	53.5	5.48	796.77	22	2	15	1.196	1.054	0.86	1.005	0.993	1.041	0.99762	0.942471	0.996393	0.99582	0.973579	0.927939	87.4	97	107.4	108.2	8.14433e+07	6.46464e+07	6.8704e+07	7.62949e+07	7.34733e+07	7.86937e+07	8.6081e+07	8.15754e+07	8.44531e+07	6.83894e+07	1.04611e+08	8.50935e+07	High	High	High	High	High	High
Master Protein	I1KQU2	Aminotran_1_2 domain-containing protein OS=Glycine max OX=3847 GN=100807796 PE=3 SV=1	0	295.254	70	23	323	3	458	49.9	7.09	953.83	23	8	20	1.447	1.492	0.783	1.062	0.996	1.078	0.89935	0.936334	0.978328	0.92792	0.976628	0.889821	94.6	104.9	109.3	91.2	2.2441e+08	1.86253e+08	1.79524e+08	1.97942e+08	2.06525e+08	2.23943e+08	2.54284e+08	2.15182e+08	2.0497e+08	1.79499e+08	1.72692e+08	1.99538e+08	High	High	High	High	High	High
Master Protein	A0A368UHK5	Uncharacterized protein OS=Glycine max OX=3847 GN=GLYMA_10G150000 PE=4 SV=1	0	295.179	43	38	278	3	1118	123.4	7.15	585.18	38		1	1.966	1.711	0.658	1.1	1.352	0.805	0.682937	0.914855	0.859912	0.906675	0.777042	0.878072	54.3	99.6	115	131.1	4.79799e+06	2.90397e+06	3.17667e+06	5.95921e+06	5.58619e+06	5.82806e+06	6.79143e+06	6.22145e+06	6.72546e+06	8.68512e+06	5.70254e+06	7.66766e+06	Peak Found	Peak Found	High	Peak Found	Peak Found	Peak Found
Master Protein	P28583	Calcium-dependent protein kinase SK5 OS=Glycine max OX=3847 PE=1 SV=1	0	294.721	58	25	205	4	508	57.1	5.38	540.13	25	8	0	1.128	1.02	0.856	0.965	0.839	1.161	0.991535	0.963614	0.999879	0.99582	0.826917	0.78294	113.9	118.8	92.5	74.8	7.12912e+06	6.90981e+06	4.01472e+06	8.05169e+06	5.83276e+06	7.20708e+06	5.36068e+06	7.57039e+06	5.61322e+06	4.53729e+06	5.61599e+06	3.88856e+06	High	High	High	High	High	High
Master Protein	I1MLW9	PKS_ER domain-containing protein OS=Glycine max OX=3847 GN=GLYMA_16G073600 PE=4 SV=1	0	294.668	79	21	379	20	319	34.6	6.67	1102.41	21	16	1	2.358	4.053	0.567	1.05	1.168	0.904	0.206587	0.0518604	0.621658	0.945351	0.935624	0.983378	94.5	93.3	105.3	107	2.74615e+08	2.12295e+08	2.66573e+08	2.4129e+08	2.63363e+08	3.16767e+08	2.97059e+08	2.81893e+08	3.01946e+08	3.00871e+08	3.01904e+08	3.12972e+08	High	High	High	High	High	High
Master Protein	I1N1Y9	Peptidylprolyl isomerase OS=Glycine max OX=3847 GN=100781128 PE=4 SV=2	0	294.46	53	27	324	9	544	60.9	5.24	795.24	27	18	12	1.743	2.598	0.588	0.907	1.09	0.793	0.68427	0.450327	0.683985	0.911194	0.983775	0.829115	73.3	114.5	100.3	111.9	7.97496e+07	8.06852e+07	7.22262e+07	9.56047e+07	1.24603e+08	1.29523e+08	1.09231e+08	9.27718e+07	1.11311e+08	1.07262e+08	1.21827e+08	1.35971e+08	High	High	High	High	High	High
Master Protein	I1KL66	Aldedh domain-containing protein OS=Glycine max OX=3847 GN=100791508 PE=4 SV=1	0	293.521	70	21	272	4	537	57.6	6.99	798.48	21	7	0	1.031	0.566	1.281	1.14	0.618	0.873	0.94041	0.442872	0.732372	0.790767	0.0767221	0.973791	54.6	39.9	71.9	233.6	9.05964e+06	1.33706e+07	1.12156e+07	7.84465e+06	8.19759e+06	9.43291e+06	2.74986e+07	1.47583e+07	8.23142e+06	1.86897e+07	4.79663e+07	5.11189e+07	High	High	High	High	High	High
Master Protein	I1K099	Uncharacterized protein OS=Glycine max OX=3847 GN=GLYMA_05G046700 PE=3 SV=1	0	293.498	62	28	354	5	476	52.3	7.01	813.21	28	5	1	3.479	5.208	0.398	1.094	1.206	0.888	0.105676	0.15124	0.288727	0.893455	0.930858	0.983378	50	110.1	123.3	116.5	4657754	3.43365e+06	2.39934e+06	6.41272e+06	7.56474e+06	8.42117e+06	1.63767e+07	6.74489e+06	8.46858e+06	8.00382e+06	7.4867e+06	1.03729e+07	High	High	High	High	High	High
Master Protein	A0A0R4J4D2	PKS_ER domain-containing protein OS=Glycine max OX=3847 GN=100777558 PE=3 SV=1	0	293.463	66	15	356	3	358	39.1	5.95	999.36	15	10	15	0.904	0.583	1.085	0.884	0.667	1.274	0.797844	0.372574	0.821271	0.814392	0.14451	0.444365	121.6	113.2	102.6	62.6	2.39627e+08	2.26397e+08	2.75069e+08	2.45975e+08	1.99674e+08	2.23212e+08	1.85681e+08	2.28015e+08	2.02274e+08	1.23365e+08	1.55722e+08	1.20795e+08	High	High	High	High	High	High
Master Protein	I1MUM8	Malate synthase OS=Glycine max OX=3847 GN=100813906 PE=3 SV=1	0	293.242	63	29	230	9	556	62.7	6.37	616.14	29	17	0	1.06	1.481	0.835	0.898	1.027	0.881	0.95445	0.970875	0.999879	0.927331	0.991287	0.982511	105.1	105.9	90.7	98.4	1.44999e+07	1.19391e+07	8.31901e+06	1.33833e+07	1.2023e+07	1.03137e+07	1.01613e+07	1.02975e+07	1.16899e+07	3.61096e+06	1.15404e+07	1.11701e+07	High	High	High	High	High	High
Master Protein	A0A0R0EDH2	Dihydrolipoamide acetyltransferase component of pyruvate dehydrogenase complex OS=Glycine max OX=3847 GN=GLYMA_20G189500 PE=3 SV=2	0	293.111	46	19	192	9	628	68.1	6.27	576.42	19		11	1.315	1.346	1.015	1.037	1.195	0.84	0.965922	0.973997	0.894002	0.967018	0.915525	0.932779	97.1	89	100.3	113.6	1.40299e+08	1.23339e+08	1.42252e+08	1.14001e+08	1.375e+08	1.28582e+08	2.151e+08	1.31833e+08	1.44906e+08	1.6413e+08	1.68733e+08	1.57278e+08	High	High	High	High	High	High
Master Protein	I1JXQ5	Alpha-mannosidase OS=Glycine max OX=3847 GN=100798150 PE=3 SV=2	0	292.994	40	34	247	11	1011	114.2	6.7	524.45	34	4	23	1.274	1.481	0.739	0.96	1.019	0.928	0.982725	0.945195	0.945936	0.992912	0.985979	0.998104	92.7	97.4	101.5	108.3	5.03815e+07	3.58806e+07	4.82463e+07	5.0041e+07	5.07134e+07	6.27714e+07	5.18937e+07	6.19516e+07	5.28451e+07	5.7497e+07	5.63812e+07	5.59352e+07	High	High	High	High	High	High
Master Protein	I1K672	Importin N-terminal domain-containing protein OS=Glycine max OX=3847 GN=100805445 PE=4 SV=1	0	292.491	36	20	130	1	870	96.3	4.78	395.36	20	5	0	100	100	0.01	1.335	15.604	0.086	1.74058e-16	1.52446e-16	1.83145e-16	0.768249	2.32487e-16	2.5378e-16		22.3	29.8	347.9						207671		260658	294963	3.24058e+06			Not Found	Not Found	Not Found	Not Found	Not Found	Peak Found
Master Protein	I1LEE5	EGF_CA domain-containing protein OS=Glycine max OX=3847 GN=100803958 PE=4 SV=1	0	292.373	61	27	236	7	631	69.7	5.54	576.32	27	10	0	1.052	0.994	0.875	0.906	0.948	0.882	0.947525	0.9297	0.992369	0.929234	0.942165	0.982511	89.7	108.5	95.9	105.9	1.05673e+07	1.32861e+07	1.13329e+07	1.36955e+07	1.3267e+07	1.55977e+07	1.12334e+07	1.21056e+07	1.2463e+07	2.33363e+07	1.20631e+07	1.33786e+07	High	High	High	High	High	High
Master Protein	I1MBI9	Peroxidase OS=Glycine max OX=3847 GN=GLYMA_14G201700 PE=3 SV=1	0	291.985	51	18	319	9	359	40	9.54	862.41	18	14	9	1.333	1.042	0.931	1.194	0.929	1.21	0.958883	0.939854	0.9579	0.386655	0.924204	0.606617	102.2	90.9	108	98.8	3.4178e+08	3.28372e+08	3.24293e+08	2.82067e+08	2.91996e+08	3.36483e+08	4.24195e+08	3.43093e+08	3.4703e+08	2.10429e+08	3.17317e+08	4.03878e+08	High	High	High	High	High	High
Master Protein	C6TLX4	PKS_ER domain-containing protein OS=Glycine max OX=3847 GN=100788619 PE=2 SV=1	0	291.701	68	17	286	16	322	35.1	5.82	891.74	17	19	1	1.149	1.215	1.052	1.146	1.309	0.899	0.983748	0.994192	0.861743	0.620745	0.729058	0.982511	108.8	84.1	94.3	112.8	2.10382e+08	1.4437e+08	1.88198e+08	1.30686e+08	1.45434e+08	1.54627e+08	1.83736e+08	1.63116e+08	1.54722e+08	1.50205e+08	2.04986e+08	1.95084e+08	High	High	High	High	High	High
Master Protein	I1LQF7	Isoflavone conjugate hydrolyzing beta glucosidase OS=Glycine max OX=3847 GN=ICHG PE=2 SV=1	0	291.669	43	17	304	16	514	58.3	8	888.1	17	12	1	1.318	0.901	0.821	1.085	0.708	1.537	0.964906	0.869312	0.998222	0.854371	0.266895	0.0612374	102.2	99.6	142.3	55.9	8.76103e+07	1.6017e+08	1.44502e+08	1.58033e+08	1.29175e+08	1.40861e+08	2.1268e+08	1.38237e+08	2.0136e+08	2.05123e+08	7.91134e+07	7.22822e+07	High	High	High	High	High	High
Master Protein	I1MD26	PALP domain-containing protein OS=Glycine max OX=3847 GN=100805303 PE=4 SV=1	0	291.306	54	16	217	13	519	57.2	7.17	743.61	16	15	3	0.92	0.903	0.885	0.894	0.841	1.113	0.819717	0.876704	0.986228	0.857586	0.739556	0.803561	112.1	105.3	102.4	80.2	1.04933e+08	1.12764e+08	1.06539e+08	1.0934e+08	9.88655e+07	1.00134e+08	9.73257e+07	9.732e+07	9.449e+07	7.10061e+07	9.37627e+07	7.62858e+07	High	High	High	High	High	High
Master Protein	I1LKM5	Pyr_redox_2 domain-containing protein OS=Glycine max OX=3847 GN=100817682 PE=4 SV=1	0	291.178	70	20	783	8	360	39.3	9.42	1417.2	20	11	14	1.066	1.568	1.081	1.112	1.303	0.772	0.941713	0.916317	0.828748	0.757844	0.738366	0.776718	114.5	82.5	89.3	113.8	1.02537e+09	7.92877e+08	1.05639e+09	6.92352e+08	7.83887e+08	7.3862e+08	1.21091e+09	7.99416e+08	6.68093e+08	9.92178e+08	1.01906e+09	1.18634e+09	High	High	High	High	High	High
Master Protein	C6T034	EF1_GNE domain-containing protein OS=Glycine max OX=3847 GN=100500082 PE=2 SV=1	0	291.126	87	15	266	2	223	24.3	4.68	693.88	15	2	15	0.972	0.819	1.011	0.973	0.983	1.042	0.86974	0.782535	0.896836	0.996239	0.965301	0.934055	106.9	105.3	93	94.8	2.72632e+08	2.40641e+08	2.72053e+08	2.68102e+08	2.8432e+08	2.18668e+08	2.30387e+08	2.36622e+08	2.62328e+08	1.25479e+08	2.41243e+08	2.79723e+08	High	High	High	High	High	High
Master Protein	A0A0R0HYB1	Uncharacterized protein OS=Glycine max OX=3847 GN=100819821 PE=3 SV=1	0	290.88	65	21	186	15	473	51.6	8.34	592.03	21	11	6	0.738	0.751	1.265	1.063	0.894	1.314	0.466604	0.708528	0.598288	0.911844	0.880615	0.422605	137.7	86.3	103.5	72.5	7.5762e+07	7.30502e+07	9.06334e+07	5.90615e+07	4.68613e+07	4.74797e+07	7.38768e+07	4.30005e+07	5.69704e+07	4.9687e+07	3.98649e+07	3.1584e+07	High	High	High	High	High	High
Master Protein	K7LN65	Glycosyltransferase OS=Glycine max OX=3847 GN=100777250 PE=3 SV=1	0	290.719	62	23	209	22	495	55.8	6.13	697.6	23	11	1	0.523	0.354	1.533	0.831	0.543	1.618	0.0684818	0.0528201	0.247258	0.461861	0.0117935	0.046786	161	89.8	93.3	55.8	1.01459e+08	1.06288e+08	7.23375e+07	6.97585e+07	5.66059e+07	5.25213e+07	6.0224e+07	3.91655e+07	5.88097e+07	3.98028e+07	3.51673e+07	2.4907e+07	High	High	High	High	High	High
Master Protein	I1KZ09	Uncharacterized protein OS=Glycine max OX=3847 GN=100810475 PE=4 SV=1	0	290.532	63	17	208	3	393	41.7	8.51	613.79	17	8	15	0.787	0.748	1.166	1.013	0.954	1.073	0.578823	0.674341	0.734548	0.989478	0.949131	0.88132	110.9	91.7	105.3	92.1	1.00547e+08	8.5394e+07	8.61694e+07	7.60512e+07	7.12556e+07	6.71489e+07	8.17889e+07	6.37788e+07	8.34463e+07	6.67883e+07	7.15906e+07	7.56408e+07	High	High	High	High	High	High
Master Protein	K7MFC0	GYF domain-containing protein OS=Glycine max OX=3847 GN=100810477 PE=4 SV=1	0	290.52	35	35	192	20	1616	179.2	6.23	457.77	35	16	0	1.627	1.852	0.531	0.87	1.039	0.826	0.868323	0.891753	0.670214	0.820811	0.998832	0.932779	78	120.1	87.2	114.7	1.13278e+07	1.12037e+07	7.66903e+06	1.44426e+07	1.72521e+07	1.82267e+07	1.25299e+07	1.20363e+07	1.32575e+07	1.42656e+07	1.74196e+07	1.64793e+07	High	High	High	High	High	High
Master Protein	I1M228	Eukaryotic translation initiation factor 3 subunit D OS=Glycine max OX=3847 GN=100802805 PE=3 SV=1	0	290.263	49	18	211	1	557	63.7	5.69	726.43	18	13	0	0.323	0.42	1.34	0.501	0.649	0.771	0.215399	0.628825	0.849488	0.0211263	0.565351	0.948976	167.4	108.2	54.1	70.3	261081	1.50688e+06	1.09024e+06	956317	519139			378010	329023		457620		Peak Found	High	High	Peak Found	High	Not Found
Master Protein	I1JP48	Dolichyl-diphosphooligosaccharide--protein glycosyltransferase subunit 2 OS=Glycine max OX=3847 GN=100780415 PE=3 SV=1	0	290.229	46	20	242	8	687	74.8	6.33	792.22	20	3	12	1.7	1.919	0.657	0.978	1.271	0.738	0.737701	0.828393	0.861743	0.997086	0.821668	0.700053	83.7	106.3	93.6	116.4	3.39267e+07	4.52678e+07	4.69468e+07	6.58158e+07	5.75062e+07	5.11287e+07	4.55303e+07	6.06908e+07	5.06566e+07	9.64261e+07	5.37901e+07	6.29357e+07	High	High	High	High	High	High
Master Protein	I1J547	Aminotran_1_2 domain-containing protein OS=Glycine max OX=3847 GN=GLYMA_01G026700 PE=4 SV=1	0	289.51	59	21	254	6	481	53.5	5.69	775.78	21	1	0	1.205	1.056	1.005	1.143	0.922	1.112	0.999619	0.946182	0.934324	0.751514	0.91688	0.82512	83	95.7	103.4	117.9	1.55822e+07	1.02725e+07	1.11659e+07	1.34847e+07	1.12745e+07	1.28839e+07	2.35835e+07	1.238e+07	1.3909e+07	1.07655e+07	1.58722e+07	1.95221e+07	High	High	High	High	High	High
Master Protein	A0A0R4J410	Obg-like ATPase 1 OS=Glycine max OX=3847 GN=100813501 PE=3 SV=1	0	289.472	75	22	261	22	394	44.4	6.8	671.27	22	15; 9	0	1.135	1.096	0.976	1.024	1.195	0.806	0.976488	0.959797	0.92794	0.981606	0.915525	0.862898	109.3	92.6	92.2	105.8	1.24104e+08	1.27254e+08	1.04903e+08	1.05164e+08	1.06843e+08	9.10556e+07	9.62925e+07	1.04683e+08	1.09097e+08	1.24728e+08	1.20096e+08	1.10516e+08	High	High	High	High	High	High
Master Protein	I1JHQ1	Uncharacterized protein OS=Glycine max OX=3847 GN=100778257 PE=3 SV=1	0	289.374	56	25	222	8	566	60.6	6.44	580.36	25	2	17	1.247	1.429	0.748	0.947	1.086	0.843	0.992683	0.965845	0.953302	0.981606	0.983775	0.946649	113.3	97.1	90.2	99.4	6.85639e+07	8.67966e+07	8.55571e+07	7.33414e+07	6.68433e+07	7.57683e+07	6.80737e+07	8.06323e+07	6.09555e+07	7.87709e+07	7.50151e+07	6.71492e+07	High	High	High	High	High	High
Master Protein	I1J6L0	Uncharacterized protein OS=Glycine max OX=3847 GN=100811217 PE=3 SV=1	0	289.335	70	24	231	24	527	57.3	7.05	623.71	24	1	0	1.208	1.252	0.852	0.972	1.082	0.836	0.999918	0.999972	0.998222	0.996239	0.9898	0.932779	105.3	101.5	95.1	98.1	5.86494e+07	6.67477e+07	7.38467e+07	8.39827e+07	6.43428e+07	5.35609e+07	4.95142e+07	8.49647e+07	6.02642e+07	9.12186e+07	6.21877e+07	5.59579e+07	High	High	High	High	High	High
Master Protein	I1KUN0	Uncharacterized protein OS=Glycine max OX=3847 GN=100797897 PE=4 SV=2	0	289.298	31	37	155	27	1630	184	6.1	271.43	37	8	10	2.224	2.58	0.494	1.145	1.423	0.821	0.358106	0.582008	0.46241	0.631217	0.541237	0.895736	46.8	96.1	109.4	147.7	1.79661e+07	1.93161e+07	1.45217e+07	3.23229e+07	3.69146e+07	3.82665e+07	4.41614e+07	4.19146e+07	4.20102e+07	5.6721e+07	3.78603e+07	5.7302e+07	High	High	High	High	High	High
Master Protein	A0A0R0EAL6	PKS_ER domain-containing protein OS=Glycine max OX=3847 GN=100804892 PE=3 SV=1	0	288.973	67	15	352	3	357	39	5.8	939.01	15	20	0	0.594	0.477	1.284	0.662	0.622	1.233	0.253022	0.254686	0.604061	0.00434553	0.075206	0.641847	120.9	111.1	80.3	87.6	2.39263e+07	3.5873e+07	5.72779e+07	5.29003e+07	3.29661e+07	3.21495e+07	1.94318e+07	2.38207e+07	3.3641e+07	3.40805e+07	2.59818e+07	1.66933e+06	High	High	High	High	High	High
Master Protein	I1JAQ7	Oxidored_FMN domain-containing protein OS=Glycine max OX=3847 GN=100803381 PE=4 SV=2	0	288.857	75	23	236	19	402	45.2	6.84	586.93	23	1	4	2.474	3.478	0.501	0.956	1.516	0.611	0.155439	0.153479	0.447757	0.989478	0.315493	0.156474	55.9	99.3	90.3	154.6	4.88872e+07	4.5475e+07	3.45236e+07	5.19111e+07	9.04072e+07	8.08572e+07	7.35064e+07	8.5133e+07	6.04918e+07	8.37079e+07	1.25843e+08	1.2921e+08	High	High	High	High	High	High
Master Protein	I1NID6	Uncharacterized protein OS=Glycine max OX=3847 GN=GLYMA_20G213700 PE=3 SV=1	0	288.818	68	16	258	7	354	39.8	5.76	762.08	16	20	11	0.579	0.685	1.728	1.001	1.284	0.829	0.138089	0.572331	0.110745	0.996018	0.779266	0.918306	138.9	78.3	80.8	101.9	1.8025e+08	1.345e+08	1.53334e+08	1.04352e+08	8.63917e+07	6.63279e+07	1.06956e+08	8.92229e+07	8.14998e+07	1.6983e+08	1.12476e+08	6.74505e+07	High	High	High	High	High	High
Master Protein	I1K5I3	Semialdhyde_dh domain-containing protein OS=Glycine max OX=3847 GN=GLYMA_05G240700 PE=3 SV=1	0	288.761	51	17	220	5	376	41.1	7.81	566.43	17	5	0	0.925	0.844	1.109	0.983	0.949	1.026	0.861892	0.808036	0.777215	0.999892	0.94553	0.963445	113	103	92.8	91.3	2.95253e+07	2.71947e+07	2.83837e+07	2.58613e+07	2.13945e+07	2.6625e+07	2.32965e+07	2.74844e+07	2.05716e+07	2.4206e+07	2.2919e+07	1.37914e+07	High	High	High	High	High	High
Master Protein	I1J5B4	AA_TRNA_LIGASE_II domain-containing protein OS=Glycine max OX=3847 GN=100812652 PE=3 SV=1	0	288.249	55	38	365	11	717	82.3	7.46	717.86	38	1	0	1.278	1.569	0.716	0.922	1.173	0.822	0.980418	0.929803	0.924852	0.945351	0.944949	0.896367	105.7	108.2	94.9	91.2	5.11203e+07	5.04597e+07	3.92076e+07	5.3781e+07	5.16284e+07	4.08066e+07	3.84255e+07	4.76025e+07	4.53046e+07	4.15408e+07	4.35415e+07	5.48567e+07	High	High	High	High	High	High
Master Protein	K7MZP4	WD_REPEATS_REGION domain-containing protein OS=Glycine max OX=3847 GN=GLYMA_19G223400 PE=4 SV=1	0	288.152	36	29	197	2	1130	123	8.13	511.52	29	19	0	1.236	1.612	0.527	0.817	0.673	1.077	0.99762	0.962445	0.837996	0.657109	0.50177	0.934063	41.5	147.5	117.8	93.3	642773	2.84884e+06	634677	2.67551e+06	2.28578e+06	2.28627e+06	1.41858e+06	3.17016e+06	1.82589e+06	1.89582e+06	1.44718e+06	1.22665e+06	High	High	High	High	High	High
Master Protein	I1N696	Uncharacterized protein OS=Glycine max OX=3847 GN=100784739 PE=4 SV=1	0	288.028	72	24	243	15	495	54.9	5.63	603.16	24	19	0	0.765	0.673	1.132	1.023	0.905	1.183	0.55876	0.583952	0.787227	0.980533	0.914019	0.71337	108.7	85.1	145.7	60.5	3.94164e+07	3.41852e+07	3.606e+07	2.82401e+07	3.35614e+07	2.7343e+07	5.12891e+07	2.58159e+07	4.83349e+07	1.81779e+07	4.5793e+07	2.00538e+07	High	High	High	High	High	High
Master Protein	I1NHF4	Chorismate synthase OS=Glycine max OX=3847 GN=100814518 PE=3 SV=1	0	287.888	57	20	263	9	435	47	7.72	733.37	20	20	13	1.035	0.926	0.866	0.886	0.835	1.069	0.920441	0.886571	0.992234	0.82475	0.720352	0.903278	128.5	102.5	97.9	71.1	1.55489e+08	1.77105e+08	1.67029e+08	1.33267e+08	1.25949e+08	1.41649e+08	1.51233e+08	1.2724e+08	1.0159e+08	9.24453e+07	9.60427e+07	7.5038e+07	High	High	High	High	High	High
Master Protein	A0A0R0H2Q4	Epimerase domain-containing protein OS=Glycine max OX=3847 GN=GLYMA_12G084100 PE=4 SV=1	0	287.763	80	23	278	7	340	37.9	5.58	697.15	23	12	1	0.766	1.728	1.106	0.939	1.04	0.965	0.630185	0.922377	0.771708	0.974156	0.998905	0.983378	137.7	88.1	97.7	76.4	3.15182e+07	2.77292e+07	2.77825e+07	2.12205e+07	1.77637e+07	1.77647e+07	1.97133e+07	1.70203e+07	2.20053e+07	2.06399e+07	1.54178e+07	1.54168e+07	High	High	High	High	High	High
Master Protein	I1MRT3	Uncharacterized protein OS=Glycine max OX=3847 GN=100803230 PE=4 SV=1	0	287.628	55	20	198	5	497	54.2	6.28	659.33	20	17	16	0.812	0.736	1.071	1.024	0.989	0.988	0.637659	0.663081	0.839397	0.981606	0.968543	0.982511	125.5	91.8	95.9	86.7	1.43385e+08	1.38931e+08	1.49574e+08	1.14363e+08	9.23095e+07	1.04866e+08	1.22755e+08	9.90475e+07	1.09571e+08	1.44404e+08	9.90285e+07	9.40513e+07	High	High	High	High	High	High
Master Protein	C6TL41	Eukaryotic translation initiation factor 3 subunit I OS=Glycine max OX=3847 GN=100819486 PE=2 SV=1	0	287.562	78	19	257	5	326	35.9	6.76	648.11	19	12	3	0.974	1.394	1.225	1.002	1.15	0.944	0.882299	0.981938	0.687032	0.99582	0.948318	0.999972	133.7	83.4	92.8	90.1	3.64992e+07	3.53563e+07	3.44986e+07	2.35789e+07	2.20681e+07	2.17982e+07	2.89844e+07	2.45331e+07	2.13966e+07	3.09413e+07	2.38307e+07	2.06055e+07	High	High	High	High	High	High
Master Protein	C6TKZ2	NAD(P)-bd_dom domain-containing protein OS=Glycine max OX=3847 GN=100819843 PE=2 SV=1	0	287.242	71	19	369	4	342	38.5	7.17	1018.71	19	12	9	0.831	0.642	0.962	0.864	0.763	1.195	0.67442	0.487584	0.936135	0.721334	0.465552	0.622972	134.5	102.5	93.3	69.7	1.20387e+08	1.63368e+08	1.41348e+08	1.46553e+08	1.07677e+08	1.00081e+08	8.21602e+07	9.80552e+07	1.20036e+08	5.68983e+07	9.73993e+07	7.32058e+07	High	High	High	High	High	High
Master Protein	I1LGS5	Acyl-coenzyme A oxidase OS=Glycine max OX=3847 GN=GLYMA_11G035200 PE=3 SV=1	0	287.112	66	33	168	6	665	74.5	7.39	362	33	11	27	2.23	2.689	0.527	1.253	1.373	0.881	0.379762	0.553256	0.668913	0.211801	0.6134	0.973791	58.7	91.8	115.4	134.1	1.69941e+07	1.98958e+07	1.71794e+07	3.13826e+07	2.57826e+07	2.68586e+07	3.37676e+07	3.18095e+07	3.53683e+07	5.29817e+07	2.4931e+07	3.9252e+07	High	High	High	High	High	High
Master Protein	C6ZHS4	Eukaryotic translation initiation factor 5A OS=Glycine max OX=3847 GN=100803862 PE=2 SV=1	0	286.968	83	14	457	8	160	17.5	5.99	1111.29	14	5; 17; 4; 6	6	1.396	2.221	0.687	0.995	1.211	0.859	0.928224	0.594283	0.883264	0.996239	0.896203	0.951431	97.2	104.8	101.3	96.7	5.57205e+08	5.52525e+08	4.58745e+08	5.57233e+08	5.95272e+08	6.07552e+08	6.04352e+08	5.51638e+08	5.75522e+08	4.88751e+08	5.49621e+08	5.96355e+08	High	High	High	High	High	High
Master Protein	K7MTZ4	Epimerase domain-containing protein OS=Glycine max OX=3847 GN=GLYMA_18G220600 PE=4 SV=1	0	286.752	65	22	232	4	372	41	6.9	614.21	22	18	9	0.874	0.705	1.147	1.009	0.92	1.147	0.806353	0.635843	0.732921	0.993579	0.91969	0.809392	105.1	93.8	88.7	112.4	3.527e+07	2.70777e+07	2.58063e+07	2.41707e+07	2.05915e+07	2.49473e+07	4.36395e+07	2.07377e+07	2.28563e+07	3.1886e+07	2.29601e+07	2.89746e+07	High	High	High	High	High	High
Master Protein	C6T7V6	Uncharacterized protein OS=Glycine max OX=3847 GN=100799358 PE=2 SV=1	0	286.195	69	18	336	2	309	33.1	6.79	810.64	18	3	15	1.293	1.108	0.813	1.051	0.983	1.086	0.973959	0.962445	0.992154	0.944985	0.965301	0.877975	102.2	97.4	104.5	95.9	1.79209e+08	1.41489e+08	1.65214e+08	1.62494e+08	1.51652e+08	1.57387e+08	1.6887e+08	1.64937e+08	1.79737e+08	1.06645e+08	1.55032e+08	1.64708e+08	High	High	High	High	High	High
Master Protein	I1LI24	VWFA domain-containing protein OS=Glycine max OX=3847 GN=GLYMA_11G078100 PE=4 SV=1	0	285.591	48	13	239	3	405	42.9	4.73	815.8	13	11	1	1.117	1.113	0.91	1.029	0.91	1.07	0.973145	0.966408	0.979243	0.967129	0.913552	0.916067	103.7	101.1	99.7	95.5	4.51069e+07	4.6154e+07	4.41522e+07	3.93097e+07	4.3962e+07	4.91633e+07	5.76581e+07	4.08702e+07	4.33436e+07	2.38894e+07	4.15435e+07	5.13896e+07	High	High	High	High	High	High
Master Protein	I1L5K6	Carboxypeptidase OS=Glycine max OX=3847 GN=100804815 PE=3 SV=1	0	285.365	63	24	181	12	496	55.6	6.71	592.07	24	9	12	0.688	0.576	1.38	0.971	0.831	1.129	0.348185	0.394444	0.444705	0.996239	0.712236	0.811428	136	101.8	100.2	61.9	7.18661e+07	7.84005e+07	7.83819e+07	5.86659e+07	5.42658e+07	6.07102e+07	4.17277e+07	6.17917e+07	5.77194e+07	3.5689e+07	5.0165e+07	3.30715e+07	High	High	High	High	High	High
Master Protein	I1K557	Uncharacterized protein OS=Glycine max OX=3847 GN=GLYMA_05G198300 PE=4 SV=1	0	285.054	58	25	201	3	507	57	5.44	522.27	25	5	22	1.388	1.53	0.658	1.035	1.013	1.006	0.935994	0.938515	0.847941	0.965192	0.983775	0.973791	92.5	103.6	104.1	99.9	4.47741e+07	4.10192e+07	4.32283e+07	5.29385e+07	4.84164e+07	4.46213e+07	4.51388e+07	5.65202e+07	4.86432e+07	4.63901e+07	4.66697e+07	5.29423e+07	High	High	High	High	High	High
Master Protein	I1NH37	Uncharacterized protein OS=Glycine max OX=3847 GN=GLYMA_20G168100 PE=3 SV=1	0	284.841	48	20	363	3	389	44.4	10.15	888.41	20	20	18	2.34	2.936	0.442	1.018	1.341	0.708	0.216174	0.256369	0.194413	0.986465	0.656943	0.522545	58.5	97.8	100	143.6	1.02734e+08	1.95095e+08	1.31723e+08	2.20211e+08	2.48993e+08	2.05777e+08	1.73873e+08	2.79988e+08	2.25182e+08	3.23185e+08	2.77987e+08	3.24071e+08	High	High	High	High	High	High
Master Protein	A0A0R0F5Y7	WD_REPEATS_REGION domain-containing protein OS=Glycine max OX=3847 GN=GLYMA_18G072400 PE=4 SV=1	0	284.819	37	29	177	5	1116	121.9	5.52	457.83	29	18	0	1.59	5.198	0.7	0.992	1.47	0.685	0.928224	0.395106	0.955983	0.999892	0.76626	0.726442	70	135.5	60.4	134.2	598352	1.25197e+06	1.89335e+06	3.32494e+06	2.42403e+06	1.77526e+06	1.07981e+06	3.6831e+06	1.05115e+06	8.52114e+06	1.45915e+06	2.40102e+06	High	High	High	High	High	High
Master Protein	I1L6V3	Epimerase domain-containing protein OS=Glycine max OX=3847 GN=GLYMA_09G269500 PE=4 SV=1	0	284.31	74	21	235	3	327	35.9	5.59	617.41	21	9	0	0.96	1.334	1.004	0.941	1.116	0.916	0.94041	0.986763	0.9579	0.989478	0.981016	0.993397	85.9	102.6	107.8	103.8	4.30641e+06	3.05453e+06	2.02959e+06	3.36985e+06	3.64657e+06	4.83933e+06	4.57369e+06	3.2452e+06	3.83166e+06	3.68977e+06	3.41169e+06	4.64596e+06	High	High	High	High	High	High
Master Protein	K7N525	ATP-grasp domain-containing protein OS=Glycine max OX=3847 GN=100812377 PE=3 SV=1	0	284.192	52	19	185	10	633	68.6	6.83	601.03	19	20	9	0.813	0.814	1.125	1.025	1.044	0.962	0.654403	0.812127	0.818748	0.97824	0.999952	0.993397	108.4	99.5	94	98	4.30485e+07	3.65996e+07	4.5065e+07	4.20487e+07	3.83114e+07	3.95083e+07	2.91236e+07	4.91842e+07	3.7309e+07	3.66725e+07	4.01033e+07	3.89184e+07	High	High	High	High	High	High
Master Protein	I1M376	Uncharacterized protein OS=Glycine max OX=3847 GN=100819875 PE=4 SV=1	0	283.777	56	35	282	11	612	68.8	9	643.58	35	13	24	2.61	3.481	0.319	0.891	1.096	0.805	0.110586	0.153021	0.0171858	0.83438	0.978916	0.886542	71.8	111.5	101.8	114.8	4.1037e+07	4.91449e+07	5.20184e+07	7.13897e+07	7.63175e+07	7.8133e+07	7.89673e+07	6.13795e+07	6.96529e+07	7.85681e+07	6.81762e+07	1.02803e+08	High	High	High	High	High	High
Master Protein	I1MR41	Aminomethyltransferase OS=Glycine max OX=3847 GN=100809241 PE=3 SV=1	0	283.717	67	21	392	3	407	44.3	8.15	1034.61	21	17	5	1.331	1.231	0.797	0.986	0.976	1.004	0.959605	0.996048	0.988624	0.997086	0.962043	0.963445	83.8	92.5	101.8	121.9	5.20916e+07	4.287e+07	5.43635e+07	5.74523e+07	5.48916e+07	6.22992e+07	6.32733e+07	6.9124e+07	5.08194e+07	7.57316e+07	9.04057e+07	4.55175e+07	High	High	High	High	High	High
Master Protein	I1MPC6	Pyruvate kinase OS=Glycine max OX=3847 GN=100815822 PE=3 SV=1	0	283.708	52	22	247	3	577	63.6	6.99	643.97	22	16	21	1.235	1.485	0.925	0.994	1.051	0.907	0.996877	0.943741	0.963034	0.996239	0.999952	0.985117	111.2	97.6	98.8	92.4	9.96492e+07	1.07493e+08	8.90442e+07	8.92599e+07	8.74589e+07	6.81708e+07	8.85309e+07	5.99724e+07	9.30214e+07	1.3699e+08	8.27932e+07	8.10598e+07	High	High	High	Peak Found	Peak Found	Peak Found
Master Protein	C6TGA6	60S acidic ribosomal protein P0 OS=Glycine max OX=3847 GN=100777482 PE=2 SV=1	0	283.511	62	15	373	4	319	34.2	5.11	1117.95	15	14	12	1.019	1.558	0.893	1.025	1.197	0.868	0.908292	0.918628	0.98251	0.981566	0.914107	0.963445	92	92.7	93.6	121.7	2.81249e+08	3.29035e+08	2.9084e+08	2.87018e+08	3.57649e+08	2.9298e+08	2.83307e+08	2.95882e+08	3.45784e+08	3.52336e+08	3.84492e+08	4.21143e+08	High	High	High	High	High	High
Master Protein	I1KT56	Aminotran_1_2 domain-containing protein OS=Glycine max OX=3847 GN=100776446 PE=4 SV=1	0	283.487	63	17	284	5	464	50.2	7.71	882.63	17	8	0	1.352	3.281	0.81	1.076	1.406	0.662	0.969768	0.409598	0.995512	0.93802	0.626891	0.392519	118.3	75.5	100.9	105.3	1.08927e+07	1.19853e+07	1.23604e+07	1.38477e+07	7.65269e+06	7.16098e+06	1.54321e+07	1.02195e+07	8.57508e+06	2.60929e+07	1.06714e+07	1.00682e+07	High	High	High	High	High	High
Master Protein	I1LCU6	Uncharacterized protein OS=Glycine max OX=3847 GN=GLYMA_10G205500 PE=3 SV=2	0	283.065	47	35	169	34	1032	115.8	6.64	340.63	35	10	0	1.1	0.713	0.997	1.257	0.715	1.884	0.956802	0.635179	0.913278	0.203577	0.368569	0.00310258	108.4	85.2	141.5	64.9	3.24436e+07	3.35089e+07	3.59686e+07	3.71935e+07	2.63406e+07	2.17813e+07	4.71618e+07	2.32306e+07	4.37701e+07	2.55675e+07	1.33438e+07	2.00778e+07	High	High	High	High	High	High
Master Protein	B0M1A4	Catalase OS=Glycine max OX=3847 GN=100037448 PE=2 SV=1	0	282.986	52	20	339	1	492	56.7	7.25	901.72	20	6	0	0.334	0.422	2.084	0.972	1.227	0.793	0.0441597	0.429214	0.125497	0.996018	0.945477	0.895736	190.5	65.5	63.7	80.3	3.83764e+06	6.50349e+06	7.26758e+06	4.01893e+06	2.23448e+06	1.84182e+06	654940	4.81196e+06	2.17296e+06	2.7427e+06	2.74059e+06		Peak Found	High	High	High	High	High
Master Protein	A0A0R0K666	Peptidase A1 domain-containing protein OS=Glycine max OX=3847 GN=100788630 PE=3 SV=1	0	282.401	61	14	289	4	440	47	8.12	937.69	14	4	0	1.873	1.373	0.57	0.955	0.916	1.16	0.565708	0.973187	0.643054	0.989478	0.915008	0.712858	84.1	115.7	117.6	82.6	6.79885e+07	7.94274e+07	5.86798e+07	7.99788e+07	9.35651e+07	9.89986e+07	1.04973e+08	9.50291e+07	9.04335e+07	5.4655e+07	6.67682e+07	9.70407e+07	High	High	High	High	High	High
Master Protein	I1JCF9	VWFA domain-containing protein OS=Glycine max OX=3847 GN=100780583 PE=4 SV=1	0	282.272	56	15	224	5	405	43	4.67	714.25	15	2	12	1.64	1.626	0.616	0.963	1.059	0.909	0.776438	0.895605	0.749437	0.994467	0.998716	0.98431	75.7	110.6	108.3	105.4	1.16383e+08	1.35098e+08	1.08156e+08	1.38256e+08	1.70104e+08	1.82997e+08	1.71897e+08	1.43538e+08	1.66615e+08	1.2855e+08	1.62123e+08	2.04268e+08	High	High	High	High	High	High
Master Protein	I1KWV4	Uncharacterized protein OS=Glycine max OX=3847 GN=100813344 PE=3 SV=1	0	281.746	37	22	224	4	926	102.8	6.64	660.65	22	8	1	0.782	0.896	1.198	0.907	0.867	1.092	0.804186	0.931032	0.818748	0.957069	0.894104	0.937692	211.1	126.5	34.4	27.9	3.18665e+06	9.96186e+06	1.06388e+07	7.18565e+06	2.6628e+06	5.96963e+06	1.38023e+06	2.93854e+06	1.62506e+06	1.24377e+06	1.31732e+06	3.61968e+06	High	High	High	High	Peak Found	High
Master Protein	A0A0R0EPH6	Uncharacterized protein OS=Glycine max OX=3847 GN=100819824 PE=3 SV=1	0	281.616	69	17	320	4	309	33.1	6.79	780.84	17	19	0	2.125	1.644	0.601	1.031	1.314	0.974	0.585335	0.928481	0.798132	0.981606	0.823391	0.985117	65.8	83.6	121.9	128.8	3332187	3.11308e+06	2.8462e+06	3.94539e+06	3.95511e+06	6.61163e+06	5.76816e+06	4.98385e+06	5.88084e+06	7.08216e+06	6.09482e+06	4.43429e+06	High	High	High	High	High	High
Master Protein	A0A0R0JVZ4	Uncharacterized protein OS=Glycine max OX=3847 GN=100781743 PE=4 SV=1	0	281.576	51	24	274	1	614	66.2	8.13	698.4	24	5	26	1.311	1.803	0.751	0.951	1.228	0.779	0.968501	0.856123	0.953667	0.984853	0.870729	0.798263	90.9	93.3	93.7	122	9.4314e+07	9.27705e+07	7.75392e+07	9.43202e+07	1.11467e+08	9.5201e+07	9.56327e+07	1.0481e+08	8.74313e+07	1.01448e+08	1.24491e+08	1.35484e+08	Peak Found	Peak Found	Not Found	Peak Found	Peak Found	High
Master Protein	I1LEC4	Tubulin alpha chain OS=Glycine max OX=3847 GN=100799688 PE=3 SV=1	0	281.464	68	21	231	1	449	49.4	5.1	628.35	21	10	21	3.733	2.322	0.679	2.706	1.663	1.593	0.00407966	0.600245	0.883173	3.1435e-16	0.125749	0.0357939	50.8	69.4	163.1	116.7	4.9467e+07	5.70346e+07	8.62695e+07	6.76513e+07	7.79372e+07	1.86788e+08	1.83076e+08	1.80223e+08	3.08316e+08	1.19936e+08	1.31017e+08	1.72363e+08	Not Found	Not Found	Not Found	Not Found	Not Found	Peak Found
Master Protein	I1NG45	Tubulin alpha chain OS=Glycine max OX=3847 GN=100781185 PE=3 SV=1	0	281.081	68	21	232	1	449	49.4	5.1	628.35	21	20	0	100	100	0.01	0.64	1.417	0.495	1.74058e-16	1.52446e-16	1.83145e-16	0.319316	0.879184	0.343579		130.8	83.8	185.4						557413	356844	203130	880300		543600	1.14772e+06	Not Found	Not Found	Not Found	Not Found	Not Found	Peak Found
Master Protein	I1MIC1	Uncharacterized protein OS=Glycine max OX=3847 GN=100802658 PE=4 SV=1	0	280.197	63	18	286	9	415	45.2	5	869.49	18	15	10	1.425	1.068	0.648	0.925	0.69	1.386	0.912784	0.941278	0.818284	0.947006	0.209847	0.229563	84.6	131.2	111.3	72.9	9.12209e+07	1.16687e+08	8.72383e+07	1.41584e+08	1.42262e+08	1.14239e+08	1.40601e+08	1.13138e+08	1.20114e+08	5.94639e+07	1.10806e+08	7.86337e+07	High	High	High	High	High	High
Master Protein	A0A0R4J669	Pyruvate kinase OS=Glycine max OX=3847 GN=100799747 PE=3 SV=1	0	280.148	57	22	256	4	526	57.9	6.8	760.3	22	20	15	0.943	0.863	1.016	1.072	0.846	1.249	0.843832	0.837714	0.892843	0.906675	0.730963	0.495177	121.2	96.8	106.6	75.5	8.71413e+07	8.50386e+07	8.1216e+07	9.2723e+07	6.7885e+07	6.55974e+07	7.62465e+07	7.47786e+07	7.18311e+07	7.7359e+07	5.2936e+07	4.50954e+07	High	High	High	High	High	High
Master Protein	I1JAF7	Beta-adaptin-like protein OS=Glycine max OX=3847 GN=100777522 PE=3 SV=1	0	280.025	48	29	207	4	891	99	5.05	512.04	29	1	1	1.316	1.213	1.233	1.686	1.897	1.014	0.971754	0.999972	0.809434	0.000510501	0.102658	0.966172	105.8	73.4	121.6	99.2	2.72031e+06	6.11534e+06	8.70024e+06	5.80009e+06	4.24123e+06	2.94777e+06	2.99091e+06	8.42767e+06	7.03155e+06	7.45926e+06	5.73387e+06	4.71519e+06	High	High	High	High	High	High
Master Protein	I1LVH0	PKS_ER domain-containing protein OS=Glycine max OX=3847 GN=100793768 PE=4 SV=1	0	279.704	63	19	209	19	376	40.2	7.46	628.91	19	12	0	1.164	1.093	0.951	1.067	1.096	0.978	0.989987	0.959797	0.944665	0.916471	0.979578	0.982511	87.1	83.1	97.4	132.4	8.54385e+07	7.44464e+07	8.43042e+07	8.03716e+07	7.95023e+07	9.37463e+07	1.30632e+08	9.2548e+07	9.42061e+07	1.28126e+08	1.33017e+08	1.21488e+08	High	High	High	High	High	High
Master Protein	I1KRS2	Dipeptide epimerase OS=Glycine max OX=3847 GN=100793110 PE=3 SV=1	0	279.375	72	20	183	7	442	47.8	6.3	642.17	20	8	13	1.679	1.623	0.679	1.143	1.095	1.011	0.74704	0.913581	0.887437	0.587493	0.984244	0.968471	96.4	109.1	97.4	97	4.95429e+07	4.58087e+07	5.34567e+07	5.60652e+07	5.64331e+07	4.78415e+07	3.17784e+07	8.01839e+07	5.00365e+07	5.5806e+07	4.98352e+07	3.01429e+07	High	High	High	High	High	High
Master Protein	D4Q9Z5	Soyasaponin III rhamnosyltransferase OS=Glycine max OX=3847 GN=GmSGT3 PE=1 SV=1	0	278.849	65	23	254	23	472	53.5	6.27	674.85	23	8	0	0.964	0.674	1.108	1.174	0.711	1.678	0.865268	0.548754	0.792847	0.480051	0.266101	0.0150101	122.6	97	117.1	63.2	1.3953e+08	1.04208e+08	9.1918e+07	9.18735e+07	8.2453e+07	7.23563e+07	1.34816e+08	5.6958e+07	9.94963e+07	5.18971e+07	5.36965e+07	5.63635e+07	High	High	High	High	High	High
Master Protein	I1MXJ1	Uncharacterized protein OS=Glycine max OX=3847 GN=100799654 PE=3 SV=1	0	278.779	44	19	178	8	777	82.2	7.09	649	19	17	10	1.07	0.75	0.992	0.985	0.654	1.59	0.945578	0.711548	0.912401	0.997086	0.144881	0.0416201	120.2	111.2	107.2	61.5	5.55766e+07	4.69965e+07	6.28348e+07	5.14259e+07	3.70268e+07	5.25309e+07	5.20214e+07	4.39019e+07	4.95885e+07	3.30052e+07	2.84283e+07	2.61061e+07	High	High	High	High	High	High
Master Protein	I1K4M0	Aminotran_1_2 domain-containing protein OS=Glycine max OX=3847 GN=100801361 PE=4 SV=1	0	278.713	63	18	268	6	478	51.7	7.05	812.02	18	5	14	1.172	1.124	0.77	0.959	1.018	0.998	0.992687	0.966408	0.96891	0.991342	0.991287	0.975139	107.9	93.5	100	98.6	1.33512e+08	1.0042e+08	1.15238e+08	1.18418e+08	9.37214e+07	9.98066e+07	1.13896e+08	9.66532e+07	1.06762e+08	1.21644e+08	9.26145e+07	1.05257e+08	High	High	High	High	High	High
Master Protein	I1MBN8	Uncharacterized protein OS=Glycine max OX=3847 GN=100781584 PE=3 SV=1	0	278.565	52	22	225	5	566	60.6	6.54	613.11	22	14	0	2.982	3.156	0.684	1.079	1.38	0.765	0.188943	0.433732	0.916898	0.938265	0.671381	0.798687	66.2	79.9	121.6	132.3	8.34988e+06	7.10825e+06	4.80107e+06	7.84848e+06	8.58015e+06	9.01843e+06	1.3057e+07	1.38035e+07	1.26581e+07	1.24872e+07	1.55051e+07	1.42021e+07	High	High	High	High	High	High
Master Protein	A0A0R0HXH4	Uncharacterized protein OS=Glycine max OX=3847 GN=100804850 PE=4 SV=1	0	278.532	51	26	195	11	731	80.2	7.27	564.64	26	10	15	0.933	1.082	1.032	0.941	1.06	0.888	0.834903	0.949676	0.883173	0.969612	0.999952	0.982511	117.7	94.7	90.2	97.3	6.96838e+07	6.18915e+07	6.63571e+07	5.33822e+07	5.33828e+07	5.34951e+07	4.07389e+07	6.94229e+07	5.0863e+07	5.92164e+07	5.48419e+07	4.60387e+07	High	High	High	High	High	High
Master Protein	I1LY51	Oxidored_FMN domain-containing protein OS=Glycine max OX=3847 GN=GLYMA_13G109700 PE=4 SV=1	0	278.232	78	20	204	5	398	44.1	8.15	572.73	20	13	14	1.256	1.354	0.838	0.968	1.025	1	0.989987	0.980821	0.999879	0.996018	0.991287	0.97601	85.7	104.9	107.3	102	5.29984e+07	4.4971e+07	4.2824e+07	5.45259e+07	5.50672e+07	5.96921e+07	5.63167e+07	4.98715e+07	6.12302e+07	5.35451e+07	5.52537e+07	5.30131e+07	High	High	High	High	High	High
Master Protein	I1MJR2	Amine oxidase OS=Glycine max OX=3847 GN=100798399 PE=3 SV=1	0	278.151	45	23	237	16	732	82.5	6.68	634.82	23	15	8	0.968	0.741	0.982	1.027	0.852	1.221	0.868968	0.703163	0.918311	0.96808	0.786614	0.622834	107.2	92.8	103.8	96.2	6.35177e+07	5.8751e+07	6.08689e+07	5.26988e+07	6.60419e+07	4.60387e+07	6.66021e+07	5.89436e+07	4.98817e+07	3.80896e+07	5.51423e+07	5.45954e+07	High	High	High	High	High	High
Master Protein	I1LYK3	Structural maintenance of chromosomes protein OS=Glycine max OX=3847 GN=GLYMA_13G123700 PE=3 SV=2	0	277.631	33	35	165	6	1233	141.9	6.9	346.42	35	13	27	1.556	1.487	0.69	0.975	1.072	0.854	0.868968	0.962016	0.933813	0.996239	0.996354	0.947814	73.8	110.8	104.3	111.1	2.33489e+07	1.90118e+07	1.90317e+07	2.62748e+07	3.26539e+07	2.8565e+07	2.6891e+07	2.89478e+07	2.62078e+07	2.60228e+07	2.86534e+07	3.42996e+07	High	High	High	High	High	High
Master Protein	I1KXB5	Amine oxidase OS=Glycine max OX=3847 GN=547524 PE=3 SV=1	0	277.6	52	27	297	5	766	85.4	7.05	640.04	27	8	0	1.098	1.28	0.96	1.088	1.227	0.812	0.9713	0.990261	0.955983	0.9195	0.91688	0.931925	101.4	93.5	95.2	109.9	8.4609e+06	1.03848e+07	1.18057e+07	1.11016e+07	8.21081e+06	9.56702e+06	7.4838e+06	1.18078e+07	9.74574e+06	1.86783e+07	7.57204e+06	1.12501e+07	High	High	High	High	High	High
Master Protein	A0A0R4J3S5	Uncharacterized protein OS=Glycine max OX=3847 GN=100795756 PE=4 SV=1	0	277.556	53	24	273	1	619	66.7	7.87	695.86	24	8	0	2.265	2.264	0.622	1.335	1.407	1	0.791616	0.903289	0.954987	0.777926	0.91688	0.983378	56	90.2	126.9	126.9	181771			416096	273534	292454	182977	555314	411662		411488		Peak Found	Not Found	Not Found	High	Peak Found	Peak Found
Master Protein	A0A0R0JPL6	Peptidase A1 domain-containing protein OS=Glycine max OX=3847 GN=GLYMA_06G093600 PE=3 SV=1	0	277.323	57	14	283	4	468	50	8.24	973.91	14	6	11	0.998	0.81	0.95	0.91	0.747	1.284	0.88911	0.774118	0.946831	0.92093	0.406775	0.422543	106.4	104.3	108.5	80.8	2.8913e+08	4.34575e+08	2.89892e+08	3.12957e+08	2.84241e+08	2.77834e+08	2.52434e+08	3.10617e+08	2.9579e+08	1.54802e+08	2.20158e+08	2.38722e+08	High	High	High	High	High	High
Master Protein	I1K5P1	Uncharacterized protein OS=Glycine max OX=3847 GN=100499845 PE=3 SV=1	0	276.998	59	28	323	6	483	53.1	7.23	745.9	28	5	24	1.229	1.564	0.898	1.062	1.066	0.963	0.997285	0.93402	0.979243	0.92792	0.99655	0.983378	103.3	98.5	99.7	98.5	9.34167e+07	8.62892e+07	8.68796e+07	8.47224e+07	7.95514e+07	8.28002e+07	1.01193e+08	7.94028e+07	8.38554e+07	1.01042e+08	8.23724e+07	8.28268e+07	High	High	High	High	High	High
Master Protein	K7KL57	AAA domain-containing protein OS=Glycine max OX=3847 GN=100780098 PE=4 SV=1	0	276.774	34	31	184	9	1234	133.4	6.46	408.69	31	4	21	1	0.917	0.909	0.901	0.842	1.076	0.89857	0.893182	0.981436	0.909495	0.773984	0.909089	114.9	106.2	92.3	86.6	4.70638e+07	5.32094e+07	4.63142e+07	4.61709e+07	4.3476e+07	4.2149e+07	3.73022e+07	3.78007e+07	3.85491e+07	3.65824e+07	3.31411e+07	3.54783e+07	High	High	High	High	High	High
Master Protein	A0A368UIF4	Uncharacterized protein OS=Glycine max OX=3847 GN=GLYMA_02G014000 PE=3 SV=1	0	276.703	54	17	379	6	364	40.4	5.59	1188.25	17		0	1.195	1.488	0.962	0.975	1.086	0.958	0.99762	0.949133	0.936975	0.996239	0.983775	0.983555	109.4	97.1	98.7	94.8	7.05262e+07	1.1016e+08	8.74206e+07	7.744e+07	8.16627e+07	7.75878e+07	8.44413e+07	6.77055e+07	7.8853e+07	7.4303e+07	1.01214e+08	7.57422e+07	High	High	High	High	High	High
Master Protein	A0A0R0H7M5	Uncharacterized protein OS=Glycine max OX=3847 GN=100790282 PE=4 SV=1	0	276.451	29	30	258	1	1110	122.4	7.03	582.65	30	13	2	2.305	1.457	0.691	1.145	1.134	0.934	0.608315	0.970166	0.947228	0.82475	0.983775	0.997603	83	95.3	95.4	126.2	1.34774e+06	2.07928e+06	1.83946e+06	2.61123e+06	2.11195e+06	2.03553e+06	1.40273e+06	2.60775e+06	2.11347e+06	2.79527e+06	1.63409e+06	3.35336e+06	Peak Found	Peak Found	Peak Found	High	Peak Found	Peak Found
Master Protein	I1KMP3	Uncharacterized protein OS=Glycine max OX=3847 GN=100796793 PE=4 SV=1	0	276.267	57	20	202	5	497	54.2	6.48	671.76	20	7	0	0.434	0.281	2.254	0.908	0.599	1.554	0.0131333	0.017583	0.0251015	0.93802	0.0587205	0.0869553	192.5	76.1	80.2	51.2	4.43116e+07	5.3214e+07	5.80961e+07	2.72883e+07	1.87318e+07	2.10399e+07	1.73711e+07	2.69956e+07	2.2176e+07	1.61106e+07	1.41527e+07	5.77813e+06	High	High	High	High	High	High
Master Protein	P50346	60S acidic ribosomal protein P0 OS=Glycine max OX=3847 PE=2 SV=1	0	275.912	62	14	355	3	320	34.1	5.25	1072.53	14	2	0	0.707	0.846	1.22	0.883	1.213	0.779	0.393336	0.830658	0.646227	0.805894	0.894104	0.819698	119.2	85.3	89	106.4	1.0535e+08	1.07597e+08	9.48732e+07	7.41213e+07	9.7651e+07	7.5412e+07	7.86671e+07	7.10454e+07	8.05197e+07	6.59276e+07	9.40527e+07	1.16005e+08	High	High	High	High	High	High
Master Protein	I1KUU5	Protein ROOT HAIR DEFECTIVE 3 homolog OS=Glycine max OX=3847 GN=100780006 PE=3 SV=1	0	275.906	48	29	181	9	808	89.5	5.47	394.85	29	8	20	1.293	1.296	0.72	0.968	0.984	0.967	0.97553	0.999972	0.940281	0.99582	0.965028	0.987049	118.1	94.8	107	80	2.81622e+07	3.75397e+07	3.68485e+07	4.39769e+07	2.9576e+07	2.80669e+07	2.2884e+07	3.48965e+07	3.33843e+07	3.99921e+07	2.42043e+07	2.49649e+07	High	High	High	High	High	High
Master Protein	C6TJH2	Uncharacterized protein OS=Glycine max OX=3847 GN=100810611 PE=2 SV=1	0	275.847	69	14	329	9	192	21.7	9.42	1020.73	14	6	0	0.642	0.717	1.379	0.893	1.041	0.82	0.249782	0.632577	0.433102	0.85306	0.999952	0.89555	133.2	98.1	82.7	86.1	2.84938e+08	2.19512e+08	2.27412e+08	1.67506e+08	1.79223e+08	1.42849e+08	1.06911e+08	1.66486e+08	1.41219e+08	1.46991e+08	1.86574e+08	1.16413e+08	High	High	High	High	High	High
Master Protein	I1JRA0	AAA domain-containing protein OS=Glycine max OX=3847 GN=100807867 PE=3 SV=1	0	275.671	45	19	263	1	425	47.4	5.14	798.67	19	3	0	3.323	5.14	0.269	0.893	1.367	0.647	0.220884	0.174902	0.121161	0.937548	0.814002	0.566003	30.3	112.9	100.8	156	939635	739478	849014	1.64296e+06	3.15838e+06	3.78e+06	2.82133e+06	3.2776e+06	2.45057e+06	192673	4.364e+06	5.16685e+06	Peak Found	Peak Found	Peak Found	Peak Found	Peak Found	Peak Found
Master Protein	I1KL55	CN hydrolase domain-containing protein OS=Glycine max OX=3847 GN=100792563 PE=4 SV=1	0	275.654	79	22	244	22	408	45.6	6.47	681.75	22	7	0	1.011	0.829	1.097	1.088	0.891	1.251	0.900801	0.79549	0.807064	0.84518	0.869635	0.504896	115.6	97.3	103.4	83.7	1.34983e+08	1.33082e+08	1.58874e+08	1.13584e+08	1.03472e+08	1.30424e+08	1.2068e+08	1.31941e+08	1.1983e+08	9.76784e+07	1.06283e+08	8.78652e+07	High	High	High	High	High	High
Master Protein	I1MM91	Peptidylprolyl isomerase OS=Glycine max OX=3847 GN=100803189 PE=4 SV=1	0	275.429	53	27	304	10	574	63.8	5.3	688.83	27	16	0	1.591	2.511	0.499	0.895	1.098	0.804	0.86974	0.643769	0.564291	0.906675	0.979963	0.886139	89.6	107	97.5	105.9	2.48496e+07	2.0687e+07	2.00075e+07	2.58327e+07	2.40072e+07	2.47202e+07	1.95811e+07	2.29251e+07	2.25165e+07	2.62759e+07	2.44659e+07	1.99212e+07	High	High	High	High	High	High
Master Protein	I1N933	Adenylosuccinate synthetase, chloroplastic OS=Glycine max OX=3847 GN=100792329 PE=3 SV=1	0	275.195	62	22	246	4	485	52.6	7.62	693.21	22	19	1	1.066	0.742	0.936	0.941	0.78	1.251	0.94844	0.721558	0.940281	0.981606	0.556443	0.60533	102.8	103.6	104.1	89.5	2.86041e+07	2.19824e+07	2.47498e+07	2.49487e+07	2.42927e+07	2.91516e+07	2.53276e+07	2.50638e+07	2.50446e+07	1.91725e+07	2.15549e+07	2.54227e+07	High	High	High	High	High	High
Master Protein	I1NFH5	Dihydrolipoamide acetyltransferase component of pyruvate dehydrogenase complex OS=Glycine max OX=3847 GN=100813087 PE=3 SV=1	0	275.188	59	18	293	9	472	48.9	8.7	763.03	18	20	10	0.975	1.007	0.896	0.876	0.917	0.97	0.87391	0.921741	0.980093	0.777511	0.915525	0.982511	105.3	104.3	94.3	96.1	1.09849e+08	1.00607e+08	8.55932e+07	9.90396e+07	1.02673e+08	9.97214e+07	9.01186e+07	7.96778e+07	9.15382e+07	8.42964e+07	9.18289e+07	9.55463e+07	High	High	High	High	High	High
Master Protein	C6TKS1	Uncharacterized protein OS=Glycine max OX=3847 GN=100805278 PE=2 SV=1	0	274.703	67	16	287	8	273	29.6	6.15	781.62	16	6	0	1.057	0.808	1.325	0.974	0.994	0.947	0.935994	0.790002	0.538901	0.996277	0.970686	0.997603	120.7	97.6	96.6	85.1	6.4186e+07	4.22435e+07	5.72252e+07	3.91717e+07	5.47607e+07	4.6303e+07	4.00498e+07	6.40364e+07	4.58348e+07	4.03535e+07	4.63903e+07	3.17698e+07	High	High	High	High	High	High
Master Protein	A0A0R0J5W4	Cysteine synthase OS=Glycine max OX=3847 GN=GLYMA_07G206800 PE=3 SV=1	0	274.505	64	16	182	3	389	41.3	7.93	531.87	16	7	0	1.771	1.969	0.699	1.109	1.159	0.948	0.806353	0.857537	0.914953	0.865817	0.957982	0.983378	62.7	86.8	118.7	131.8	5.39835e+06	4.79529e+06	3.05993e+06	6.28078e+06	8.08992e+06	6.6411e+06	9.07799e+06	6.86477e+06	1.07229e+07	1.00807e+07	8.39307e+06	1.02533e+07	High	High	High	High	High	High
Master Protein	A0A0R0KGG4	Peptidylprolyl isomerase OS=Glycine max OX=3847 GN=100794411 PE=4 SV=1	0	274.387	50	27	314	8	582	64.7	5.21	752.38	27	3	19	1.701	2.957	0.554	0.891	1.105	0.825	0.726042	0.249696	0.583752	0.843676	0.971001	0.907531	71.9	108.5	98	121.6	1.01668e+08	1.01626e+08	7.97464e+07	1.16303e+08	1.53497e+08	1.58045e+08	1.38546e+08	1.13792e+08	1.42396e+08	1.71963e+08	1.42128e+08	1.83099e+08	High	High	High	High	High	High
Master Protein	C6TH59	Proteasome subunit alpha type OS=Glycine max OX=3847 GN=100799108 PE=2 SV=1	0	274.181	66	14	304	2	235	25.6	5.68	1003.51	14	8	13	0.947	0.818	1.087	1.012	0.968	1.017	0.848574	0.781532	0.819554	0.990388	0.958932	0.959592	106.5	93.9	96.5	103.1	3.12538e+08	2.6285e+08	2.93849e+08	2.22413e+08	2.78218e+08	2.58949e+08	3.51388e+08	2.66347e+08	2.51596e+08	2.1625e+08	2.8444e+08	2.91051e+08	High	High	High	High	High	High
Master Protein	K7MNY0	Beta-galactosidase OS=Glycine max OX=3847 GN=100804103 PE=3 SV=1	0	274.18	44	22	172	8	722	80.9	8.1	462.39	22	17	1	0.542	0.394	1.539	0.908	0.609	1.401	0.245519	0.204625	0.452976	0.93802	0.13507	0.205523	166.1	74.9	93	65.9	1.66612e+07	1.36457e+07	1.77853e+07	1.04103e+07	7.16555e+06	7.51036e+06	9.33174e+06	8.10159e+06	1.04236e+07	6.61283e+06	9.31914e+06	5.17499e+06	High	High	High	High	High	High
Master Protein	I1L922	Gln-synt_C domain-containing protein OS=Glycine max OX=3847 GN=100809101 PE=3 SV=2	0	274.09	46	28	185	28	836	92.8	6.48	493.09	28	10	0	1.219	1.45	0.854	1.068	1.205	0.888	0.99762	0.973663	0.989918	0.928966	0.902653	0.976026	71.7	93.7	103	131.6	3.1644e+07	2.32081e+07	2.2944e+07	3.0352e+07	3.73399e+07	2.96281e+07	3.25368e+07	3.67129e+07	3.33425e+07	5.00615e+07	2.80227e+07	4.2627e+07	High	High	High	High	High	High
Master Protein	I1L954	Threonine dehydratase OS=Glycine max OX=3847 GN=100777200 PE=3 SV=1	0	274.074	55	25	171	7	602	65.8	7.39	445.43	25	10	0	0.864	0.987	0.906	0.883	1.019	0.884	0.793273	0.916317	0.961073	0.85306	0.988464	0.982854	106.2	107.9	83.3	102.6	2.0732e+07	1.50642e+07	1.99308e+07	1.77224e+07	2.47756e+07	2.02421e+07	1.56381e+07	1.5199e+07	2.37581e+07	1.62283e+07	2.06343e+07	1.92537e+07	High	High	High	High	High	High
Master Protein	K7LNG2	NmrA domain-containing protein OS=Glycine max OX=3847 GN=100780246 PE=4 SV=1	0	273.945	65	17	357	5	376	41.8	8.21	1073.7	17	11	11	1.258	1.428	0.992	1.119	1.46	0.795	0.988523	0.951884	0.913278	0.733165	0.417299	0.83628	87.4	90.5	100.8	121.3	2.72846e+08	2.15868e+08	2.46119e+08	2.32269e+08	2.54893e+08	2.66612e+08	3.05027e+08	2.83651e+08	2.60767e+08	3.28154e+08	3.41419e+08	3.87244e+08	High	High	High	High	High	High
Master Protein	I1NA96	Phenylalanine ammonia-lyase OS=Glycine max OX=3847 GN=GLYMA_19G182300 PE=3 SV=1	0	273.924	53	22	202	5	712	77.7	6.49	536.28	22	19	6	0.885	0.87	0.755	0.604	0.536	1.043	0.849759	0.857197	0.97071	0.00328498	0.0147263	0.934063	116.4	144	73.6	66	1.53407e+07	1.21574e+07	1.07738e+07	2.02191e+07	1.50333e+07	1.28795e+07	6.13306e+06	1.05778e+07	7.68191e+06	5.01791e+06	6.89294e+06	8.48925e+06	High	High	High	High	High	High
Master Protein	I1K2H3	Uncharacterized protein OS=Glycine max OX=3847 GN=100783880 PE=4 SV=1	0	273.909	38	37	242	15	1048	120.9	5.6	453.66	37	5	21	1.851	2.205	0.518	0.942	1.144	0.803	0.64044	0.705133	0.520367	0.981566	0.962027	0.85625	56.6	114.4	100.3	128.7	3.01126e+07	2.25595e+07	2.16274e+07	3.2265e+07	4.56489e+07	4.62523e+07	4.18312e+07	3.73144e+07	4.00137e+07	3.82045e+07	5.13433e+07	6.37687e+07	High	High	High	High	High	High
Master Protein	C6TIJ7	Uncharacterized protein OS=Glycine max OX=3847 GN=100780100 PE=2 SV=1	0	273.454	77	19	275	5	365	39.9	6.15	666.43	19	4	17	1.495	1.393	0.693	0.901	0.743	1.185	0.87391	0.964519	0.891815	0.894413	0.386	0.648133	109.4	114.9	98.1	77.6	1.46608e+08	1.2048e+08	1.20343e+08	1.35387e+08	1.10882e+08	1.26467e+08	1.19992e+08	9.35077e+07	1.08e+08	8.90093e+07	6.18402e+07	8.54981e+07	High	High	High	High	High	High
Master Protein	I1M635	Uncharacterized protein OS=Glycine max OX=3847 GN=100794495 PE=4 SV=2	0	273.196	40	27	194	14	1037	113	5.26	394.93	27	14	11	1.477	1.248	0.564	0.844	0.784	1.126	0.88911	0.989464	0.662775	0.6563	0.558549	0.82512	85.6	124.4	99.9	90	2.84149e+07	3.11014e+07	2.43709e+07	4.12889e+07	3.74616e+07	4.64426e+07	3.316e+07	3.38722e+07	3.24469e+07	8.92758e+06	2.98758e+07	3.08421e+07	High	High	High	High	High	High
Master Protein	I1KXG9	Aldedh domain-containing protein OS=Glycine max OX=3847 GN=100811891 PE=3 SV=2	0	273.021	62	24	358	1	536	58.4	7.55	859.12	24	8	1	2.05	3.267	0.612	1.033	1.331	0.728	0.645676	0.433554	0.840959	0.985104	0.788903	0.692942	106.2	96.7	95.7	101.4	1.04651e+07	6.35243e+06	9.54605e+06	8.4028e+06	8.70411e+06	8.68644e+06	8.41381e+06	8.60201e+06	9.45437e+06	8.02704e+06	9.10954e+06	1.31972e+07	Peak Found	Peak Found	Peak Found	High	High	High
Master Protein	A0A0R0LAF9	Proteasome subunit alpha type OS=Glycine max OX=3847 GN=102662733 PE=3 SV=1	0	272.955	84	16	309	6	250	27.3	6.24	917.3	16	1; 3	12	1.443	1.589	0.758	1.025	1.128	0.906	0.900801	0.911511	0.959343	0.981566	0.962043	0.983378	91.4	99.6	103.7	105.4	1.75811e+08	1.3058e+08	1.48245e+08	1.59267e+08	1.67219e+08	1.61581e+08	1.8118e+08	1.6434e+08	1.6829e+08	1.56991e+08	1.71011e+08	1.92524e+08	High	High	High	High	High	High
Master Protein	I1LW34	Nitrate reductase OS=Glycine max OX=3847 GN=GLYMA_13G084000 PE=3 SV=1	0	272.788	40	24	109	18	886	99.7	7.11	253.13	24	13	6	6.287	11.179	0.372	2.578	3.392	0.687	0.000175915	0.000428887	0.150377	3.1435e-16	1.34911e-08	0.451793	15.6	52.5	161.6	170.4	4.11631e+06	3.62618e+06	4.26448e+06	7.9812e+06	1.38194e+07	1.44481e+07	1.01925e+07	5.31076e+07	4.25616e+07	8.43922e+07	4.05875e+07	4.4877e+07	Peak Found	Peak Found	High	Peak Found	High	High
Master Protein	I1KTY9	Sulfurtransferase OS=Glycine max OX=3847 GN=100798053 PE=4 SV=1	0	272.752	65	21	163	6	379	41.8	6.86	519.37	21	8	15	1.609	1.955	0.749	1.081	1.231	0.877	0.801131	0.784693	0.948681	0.842918	0.891202	0.976026	79.8	92.2	105.1	122.9	3.68384e+07	4.25449e+07	4.44553e+07	4.91183e+07	4.75075e+07	5.66705e+07	5.68634e+07	5.60177e+07	5.09617e+07	8.02614e+07	5.52064e+07	6.5466e+07	High	High	High	High	High	High
Master Protein	A0A0R0FB78	Uncharacterized protein OS=Glycine max OX=3847 GN=100779679 PE=4 SV=1	0	272.533	53	16	202	2	429	45.8	8.43	583.85	16	18	0	0.782	0.87	0.752	0.701	0.985	0.727	0.804338	0.917557	0.955983	0.145898	0.976513	0.798687	136.1	101.9	92.3	69.7	5.99901e+06	3.28403e+06	6.46988e+06	5.39662e+06	4.49366e+06	3.27622e+06	1.81007e+06	4.98712e+06	4.06936e+06	3.0402e+06	3.62464e+06	3.07048e+06	High	High	High	High	High	High
Master Protein	I1LZD0	Threonine dehydratase OS=Glycine max OX=3847 GN=100802802 PE=3 SV=1	0	272.22	57	27	173	9	602	65.8	7.02	463.88	27	13	18	0.947	0.982	1.001	0.916	0.986	0.949	0.859136	0.917702	0.923693	0.93112	0.963982	0.996019	97.7	107.8	95.8	98.7	5.4138e+07	4.51282e+07	4.85168e+07	5.34985e+07	5.234e+07	5.40864e+07	4.31334e+07	4.7564e+07	5.15509e+07	4.45639e+07	4.90098e+07	5.1882e+07	High	High	High	High	High	High
Master Protein	I1MS73	AP-2 complex subunit alpha OS=Glycine max OX=3847 GN=100798273 PE=3 SV=2	0	271.297	35	30	168	2	1020	113.5	6.48	442.77	30	13; 17	0	0.838	1.2	0.83	0.758	1.264	0.619	0.87391	0.998743	0.999879	0.315011	0.943895	0.522484	163.2	87.9	61.9	87	1.60891e+06	3.89762e+06	4.44064e+06	5.30347e+06	1.30811e+06	2.10084e+06	1.4797e+06	1.37779e+06	1.84498e+06	3.27235e+06	2.02909e+06	2.07746e+06	Peak Found	High	High	High	Peak Found	Peak Found
Master Protein	I1JJN9	Uncharacterized protein OS=Glycine max OX=3847 GN=GLYMA_02G304200 PE=3 SV=2	0	271.021	65	22	209	4	473	51.5	5.76	665.52	22	2	18	0.921	0.86	1.123	1.002	1.026	0.985	0.832041	0.857875	0.829613	0.99582	0.996877	0.982511	113.2	97.5	99.2	90.1	5.5067e+07	4.52879e+07	4.93827e+07	4.47603e+07	4.25267e+07	3.98757e+07	3.5888e+07	4.32882e+07	4.41979e+07	2.95756e+07	3.98793e+07	3.93149e+07	High	High	High	High	High	High
Master Protein	I1JF82	Uncharacterized protein OS=Glycine max OX=3847 GN=GLYMA_02G145300 PE=4 SV=1	0	270.71	50	24	178	9	735	81.1	7.36	506.58	24	2	0	0.959	1.274	0.88	0.864	1.051	0.786	0.868426	0.999972	0.989918	0.753129	0.999154	0.806174	106.5	112.7	97.6	83.2	3.01249e+07	3.8818e+07	4.23931e+07	4.24706e+07	2.79726e+07	4.10633e+07	2.7949e+07	3.55883e+07	3.80717e+07	3.03307e+07	3.34034e+07	1.84963e+07	High	High	High	High	High	High
Master Protein	C6T8J1	Glucose-6-phosphate 1-epimerase OS=Glycine max OX=3847 GN=100787970 PE=2 SV=1	0	270.668	75	20	225	7	326	36.5	6.2	662.18	20	13	13	1.035	0.96	0.85	0.972	0.897	1.092	0.920425	0.89012	0.998779	0.996239	0.879867	0.848722	100.6	114.6	94.9	89.8	1.02518e+08	7.20412e+07	9.49148e+07	7.26037e+07	1.08326e+08	1.08123e+08	8.94869e+07	7.82787e+07	1.10552e+08	6.23767e+07	1.05624e+08	8.47223e+07	High	High	High	High	High	High
Master Protein	I1K2I1	Tubulin alpha chain OS=Glycine max OX=3847 GN=100787058 PE=3 SV=1	0	270.607	60	19	227	4	450	49.6	5.1	590.91	19	5	1	2.71	1.692	1.148	3.35	1.99	1.728	0.229125	0.93402	0.868905	3.1435e-16	0.0308508	0.0227896	65.5	44.9	182.7	106.9	4.90444e+06	8.94473e+06	1.56343e+07	4.65852e+06	6.12783e+06	2.19392e+07	1.27561e+07	2.49369e+07	4.76977e+07	9.49649e+06	1.45857e+07	1.85631e+07	High	High	High	High	High	High
Master Protein	I1MEH3	Amidohydro-rel domain-containing protein OS=Glycine max OX=3847 GN=100795029 PE=4 SV=1	0	270.486	58	22	221	8	513	56.6	5.96	607.31	22	15	13	1.75	1.683	0.678	1.003	0.946	0.989	0.680645	0.893445	0.883173	0.99582	0.938249	0.981717	74.6	107.2	125.6	92.7	3.92754e+07	3.89454e+07	4.77704e+07	4.83498e+07	5.64802e+07	5.71652e+07	6.70207e+07	6.61367e+07	4.83723e+07	5.36806e+07	4.88169e+07	4.48486e+07	High	High	High	High	High	High
Master Protein	I1KTG8	Uncharacterized protein OS=Glycine max OX=3847 GN=100803187 PE=4 SV=1	0	270.444	55	25	307	9	668	75.3	6.98	713.84	25	8	0	0.809	0.575	0.977	0.792	0.703	1.182	0.753344	0.492211	0.948681	0.473728	0.346713	0.697395	118.9	119.4	93.8	67.9	1.12403e+07	1.23289e+07	1.20838e+07	1.44181e+07	1.21398e+07	1.01093e+07	8.95904e+06	9.53261e+06	1.09261e+07	4.11223e+06	9.01838e+06	6.9025e+06	High	High	High	High	High	High
Master Protein	I1JK05	Eukaryotic translation initiation factor 3 subunit B OS=Glycine max OX=3847 GN=100779711 PE=3 SV=1	0	270.373	50	26	193	3	718	82.7	5.22	437.53	26	3	0	3.745	6.241	0.394	1.932	2.428	0.488	0.352444	0.27052	0.693613	0.011978	0.152457	0.213006	26.3	66.5	91.2	216.1	247990	126544		448427	263583	1.56716e+06	597564	614814	1.49202e+06	1.47717e+06	1.45733e+06	420607	Peak Found	High	High	High	High	High
Master Protein	I1NH00	Pyruvate kinase OS=Glycine max OX=3847 GN=100809327 PE=3 SV=1	0	270.356	52	21	247	3	575	63.1	7.27	597.41	21	20	0	0.841	0.631	1.025	0.871	0.609	1.324	0.860667	0.754742	0.949553	0.873154	0.20968	0.517227	112	117	92.2	78.8	5.4683e+06	6.31949e+06	4.62985e+06	6.02142e+06	5.70962e+06	4.29401e+06	4.50307e+06	4.05697e+06	5.20229e+06	3.2241e+06	3.84616e+06	4.08745e+06	High	High	High	High	High	High
Master Protein	K7M5U2	GH10 domain-containing protein OS=Glycine max OX=3847 GN=100816678 PE=4 SV=1	0	270.301	45	32	235	27	901	100.3	6.42	509.38	32	14	5	2.261	2.711	0.418	0.85	1.049	0.799	0.275072	0.44902	0.181528	0.629828	0.999952	0.876746	73.3	117.3	93.6	115.7	3.6252e+07	2.68586e+07	3.35632e+07	5.63153e+07	5.37262e+07	5.01311e+07	4.28752e+07	4.67437e+07	3.5118e+07	6.17192e+07	5.04467e+07	5.29728e+07	High	High	High	High	High	High
Master Protein	I1MXL3	Uncharacterized protein OS=Glycine max OX=3847 GN=100805702 PE=3 SV=1	0	270.286	36	17	512	7	476	52.1	5.81	1436.2	17	17	10	1.494	1.593	0.723	1.022	1.227	0.864	0.87391	0.910457	0.930718	0.981606	0.872899	0.956935	87.5	92.5	104.4	115.6	1.03938e+09	9.24243e+08	1.13359e+09	1.07436e+09	1.09783e+09	1.22002e+09	1.23968e+09	1.34435e+09	1.09642e+09	1.16439e+09	1.41066e+09	1.37203e+09	High	High	High	High	High	High
Master Protein	A0A0R4J339	Uncharacterized protein OS=Glycine max OX=3847 GN=100794284 PE=3 SV=1	0	270.2	41	19	187	10	770	82.3	8.54	543.69	19	4	9	1.278	0.843	0.81	0.99	0.628	1.553	0.980972	0.83148	0.990068	0.997086	0.0898184	0.0784004	108.3	115.7	108	67.9	6.80935e+07	6.6939e+07	6.77828e+07	7.24121e+07	6.3634e+07	7.34326e+07	8.95531e+07	5.67613e+07	6.76211e+07	3.63649e+07	4.25224e+07	4.74269e+07	High	High	High	High	High	High
Master Protein	C6T918	PABS domain-containing protein OS=Glycine max OX=3847 GN=100790506 PE=2 SV=1	0	270.184	75	16	276	3	338	37.1	5.05	669.1	16	1	16	0.905	1.049	1.022	0.924	0.815	1.158	0.798934	0.942471	0.886067	0.945542	0.654289	0.736176	114.8	102.7	98.1	84.5	2.7548e+08	2.06214e+08	2.87936e+08	2.4647e+08	2.50409e+08	2.38751e+08	2.14416e+08	2.35867e+08	2.3549e+08	2.02821e+08	1.85312e+08	2.11202e+08	High	High	High	High	High	High
Master Protein	I1JXJ3	EF1_GNE domain-containing protein OS=Glycine max OX=3847 GN=GLYMA_04G195100 PE=3 SV=1	0	270.138	69	14	324	3	230	25	4.56	770.95	14	4	0	0.808	3.199	1.073	0.877	14.299	1.146	0.706327	0.28667	0.845983	0.869759	2.32487e-16	0.789807	62.8	51.8	52.2	233.2	1.82588e+07	2.05991e+07	2.236e+07	1.82108e+07	1.69902e+07	1.34805e+07	8.75709e+07	1.71084e+07	1.47968e+07	5.29213e+07	7.65096e+07	1.24616e+08	High	High	High	High	High	High
Master Protein	I1L5T1	Eukaryotic translation initiation factor 3 subunit I OS=Glycine max OX=3847 GN=100781100 PE=3 SV=1	0	269.931	78	19	254	5	326	35.8	6.76	731.8	19	9	0	0.909	1.114	1.013	0.945	1.132	0.923	0.837018	0.95244	0.877525	0.987347	0.963895	0.999972	137.8	82.5	91.2	88.5	2.81132e+07	2.81246e+07	2.38387e+07	1.53938e+07	1.81632e+07	1.68223e+07	2.46834e+07	1.86019e+07	1.68078e+07	1.80463e+07	2.73997e+07	1.72401e+07	High	High	High	High	High	High
Master Protein	I1MCJ7	Uncharacterized protein OS=Glycine max OX=3847 GN=100787814 PE=3 SV=1	0	269.74	25	29	246	5	1426	160.6	7.34	561.95	29	15	21	2.821	3.701	0.447	1.221	1.554	0.746	0.105665	0.20503	0.285508	0.300208	0.280951	0.681128	63.5	96.2	111.8	128.5	1.66586e+07	2.13732e+07	2.46429e+07	3.22222e+07	3.23598e+07	3.40139e+07	3.40857e+07	4.90932e+07	3.76278e+07	7.5356e+07	3.83972e+07	4.32414e+07	Peak Found	High	Peak Found	High	High	High
Master Protein	I1L1Q6	Uncharacterized protein OS=Glycine max OX=3847 GN=100797543 PE=3 SV=1	0	269.74	45	19	178	19	770	82	7.83	610.31	19	9	0	1.26	0.944	0.691	0.83	0.778	1.194	0.989682	0.894468	0.891377	0.530313	0.554417	0.690243	99.1	110.1	99.7	91.2	3.96616e+07	3.90942e+07	3.99969e+07	4.40814e+07	4.04292e+07	5.14898e+07	3.783e+07	3.99004e+07	4.62856e+07	1.67031e+07	4.12731e+07	3.65035e+07	High	High	High	High	High	High
Master Protein	I1NA25	Cation_ATPase_N domain-containing protein OS=Glycine max OX=3847 GN=100788807 PE=3 SV=1	0	269.5	33	28	197	9	1060	116.5	5.36	452.94	28	19	18	3.78	5.556	0.303	1.135	1.613	0.728	0.0174465	0.0511513	0.0315031	0.713864	0.194959	0.62753	47.4	93.6	118.4	140.6	1.07329e+07	1.92233e+07	1.45829e+07	2.87661e+07	3.12521e+07	2.64684e+07	2.90642e+07	3.81987e+07	3.63847e+07	7.40578e+07	2.69381e+07	4.32326e+07	High	High	Peak Found	High	High	High
Master Protein	A0A0R0GZF0	Annexin OS=Glycine max OX=3847 GN=GLYMA_13G199800 PE=3 SV=1	0	269.456	70	24	340	8	313	35.7	7.31	820.34	24	13	16	1.54	1.625	0.574	0.966	1.007	0.946	0.84944	0.896207	0.637676	0.99582	0.983775	0.997701	102.9	101.7	101.8	93.6	1.22426e+08	1.70659e+08	1.38544e+08	1.62029e+08	1.29665e+08	1.36878e+08	1.14657e+08	1.37085e+08	1.62101e+08	1.25952e+08	1.3749e+08	1.24011e+08	High	High	High	High	High	High
Master Protein	I1LLC6	OMPdecase domain-containing protein OS=Glycine max OX=3847 GN=GLYMA_11G154200 PE=3 SV=1	0	268.934	56	22	218	21	478	51.7	6.8	733.94	22	11	1	0.956	1.079	0.924	0.901	1.049	0.879	0.858549	0.949637	0.963034	0.894312	0.999952	0.97601	115.6	107.3	86.2	90.9	7.11205e+07	8.01228e+07	7.3498e+07	7.30337e+07	6.82245e+07	5.15598e+07	5.47921e+07	7.04243e+07	5.20893e+07	7.5961e+07	5.7832e+07	4.48421e+07	High	High	High	High	High	High
Master Protein	I1LWE5	Uncharacterized protein OS=Glycine max OX=3847 GN=100809557 PE=4 SV=1	0	268.784	51	22	160	22	582	66.1	7.75	337.28	22	13	0	1.519	1.605	0.796	1.21	1.464	0.836	0.87391	0.933971	0.998779	0.369754	0.415733	0.919741	83.1	87.4	109.6	119.9	2.01379e+07	2.71528e+07	2.41592e+07	3.58114e+07	2.5423e+07	2.45745e+07	3.18951e+07	4.13078e+07	3.12026e+07	5.2148e+07	3.48799e+07	3.41702e+07	High	High	High	High	High	High
Master Protein	K7K8E5	WPP domain-containing protein OS=Glycine max OX=3847 GN=100796487 PE=4 SV=1	0	268.518	69	27	183	10	533	57.7	4.78	414.23	27	2	17	2.149	2.96	0.454	0.948	1.294	0.777	0.330765	0.298623	0.254538	0.981606	0.760626	0.803561	51.7	111.9	108.4	128.1	6.57723e+07	4.53356e+07	3.5262e+07	7.19497e+07	9.82072e+07	1.16225e+08	9.51234e+07	7.70239e+07	1.0252e+08	8.30831e+07	1.13391e+08	1.12393e+08	High	High	High	High	High	High
Master Protein	I1JMY1	Alpha-L-AF_C domain-containing protein OS=Glycine max OX=3847 GN=100806458 PE=4 SV=1	0	268.302	39	18	262	4	676	73.8	6.24	792.99	18	3	14	1.221	1.569	0.891	1.062	1.249	0.789	0.99762	0.916317	0.984907	0.92792	0.839472	0.818018	100.9	98.4	87.4	113.2	1.10161e+08	1.03613e+08	1.36452e+08	1.09762e+08	8.56871e+07	1.07376e+08	9.54086e+07	1.49209e+08	8.10205e+07	1.34983e+08	1.23571e+08	1.07498e+08	High	High	High	High	High	High
Master Protein	A0A0R0HDU0	Iso_dh domain-containing protein OS=Glycine max OX=3847 GN=100778831 PE=4 SV=1	0	268.142	54	15	265	5	360	38.9	6.73	855.53	15	11	0	0.952	1.001	1.016	0.962	0.965	1.136	0.86974	0.916317	0.907467	0.99582	0.957982	0.818078	115.1	88	92.8	104.1	3.56881e+07	3.7885e+07	3.71679e+07	2.75388e+07	3.7519e+07	2.84297e+07	2.44674e+07	3.83404e+07	2.99588e+07	2.36183e+07	3.36122e+07	3.50662e+07	High	High	High	High	High	High
Master Protein	I1LE22	40S ribosomal protein S3a OS=Glycine max OX=3847 GN=GLYMA_10G245200 PE=3 SV=1	0	267.944	62	19	455	4	261	29.7	9.8	896.38	19	10	18	1.005	1.49	0.945	0.917	1.394	0.645	0.895013	0.936435	0.948681	0.933652	0.542324	0.25284	91.5	87.1	89.2	132.2	258199358	3.15596e+08	2.43919e+08	2.45543e+08	3.30734e+08	1.99984e+08	1.88188e+08	2.51479e+08	2.74875e+08	1.77644e+08	3.7298e+08	4.06843e+08	High	High	High	High	High	High
Master Protein	I1JET4	Uncharacterized protein OS=Glycine max OX=3847 GN=100791763 PE=4 SV=1	0	267.912	55	22	193	1	558	60.2	8.79	573.3	22	2	0	0.573	0.535	0.909	0.497	0.447	1.067	0.527144	0.694207	0.986594	0.000126874	0.0546258	0.942221	121	146.1	67.6	65.3	1486273	1.94569e+06	1.74404e+06	2.10507e+06	1.27054e+06	2.13951e+06	1.05566e+06	897980		555792	941225	1.04043e+06	Peak Found	Peak Found	Peak Found	Peak Found	Peak Found	High
Master Protein	I1J4F8	ATP-dependent 6-phosphofructokinase OS=Glycine max OX=3847 GN=100793844 PE=3 SV=1	0	267.571	63	23	315	5	539	58.8	7.24	746.98	23	1	0	1.17	0.749	1.095	1.194	0.66	1.834	0.99762	0.862688	0.91274	0.587493	0.31339	0.0169986	101.4	110.2	127.9	60.6	5.58947e+06	4.78493e+06	5.68635e+06	6.99989e+06	4.84244e+06	6.07493e+06	7.72168e+06	6.0188e+06	7.04959e+06	4.91952e+06	3.33926e+06	3.08658e+06	High	High	High	High	High	High
Master Protein	I1LQ43	Adenylyl cyclase-associated protein OS=Glycine max OX=3847 GN=100780824 PE=3 SV=1	0	267.499	72	25	243	7	469	50.6	7.03	648.08	25	12	18	1.356	1.718	0.711	0.907	1.109	0.918	0.946065	0.888089	0.919679	0.912131	0.966864	0.990001	81.6	106.6	97.6	114.2	8.58683e+07	7.63001e+07	6.55613e+07	9.31844e+07	1.01883e+08	9.96467e+07	1.11392e+08	9.12701e+07	8.84303e+07	1.06716e+08	1.16774e+08	1.00718e+08	High	High	High	High	High	High
Master Protein	A0A368UI37	AAA domain-containing protein OS=Glycine max OX=3847 GN=GLYMA_05G047400 PE=4 SV=1	0	267.408	33	27	182	2	1196	129.6	6.11	427.13	27		0	0.356	0.42	2.48	0.726	0.95	1.049	0.34034	0.529332	0.380788	0.703039	0.964909	0.959592	54.4	111.2	108.2	126.2	781794	25088.8		271162	286426	427779	278626	196906	284995	325101	265547	405905	Peak Found	Peak Found	Not Found	Peak Found	High	Peak Found
Master Protein	I1K7B7	Uncharacterized protein OS=Glycine max OX=3847 GN=100784075 PE=4 SV=1	0	266.78	33	28	226	7	1076	117	5.39	483.14	28	6	20	1.804	1.669	0.49	0.868	0.867	0.988	0.670059	0.919064	0.427778	0.745773	0.825941	0.982511	75.2	118.7	106.6	99.5	3.39821e+07	3.56627e+07	2.49188e+07	5.364e+07	4.87911e+07	6.16484e+07	5.28782e+07	4.47965e+07	4.81878e+07	2.11547e+07	4.947e+07	4.49477e+07	High	High	High	High	High	High
Master Protein	I1KKK0	Proteasome subunit alpha type OS=Glycine max OX=3847 GN=100793282 PE=3 SV=1	0	266.367	80	15	274	5	250	27.3	7.09	879.55	15	7	0	1.229	0.842	0.98	1.021	0.994	1.051	0.997285	0.814201	0.938974	0.981193	0.972984	0.932779	98.3	100.3	100.7	100.7	4.35327e+07	4.7371e+07	4.26718e+07	4.4533e+07	4.27123e+07	4.43941e+07	4.46739e+07	4.45682e+07	4.25894e+07	2.9108e+07	4.45859e+07	4.89209e+07	High	High	High	High	High	High
Master Protein	I1LYC1	SEC7 domain-containing protein OS=Glycine max OX=3847 GN=100794995 PE=4 SV=2	0	266.236	31	39	153	10	1782	197.6	5.69	258.4	39	13	29	1.868	2.374	0.597	1.174	1.482	0.723	0.704606	0.694696	0.807155	0.579882	0.401701	0.660779	71.1	90.6	105.2	133.1	1.52797e+07	1.77079e+07	2.15366e+07	2.44487e+07	2.25474e+07	2.09052e+07	1.92186e+07	2.7748e+07	2.62057e+07	4.2666e+07	2.39053e+07	3.31336e+07	Peak Found	High	High	High	High	Peak Found
Master Protein	I1LPR5	Uncharacterized protein OS=Glycine max OX=3847 GN=100817537 PE=3 SV=1	0	266.136	50	26	235	12	773	81.9	9.1	577.66	26	12	13	1.193	1.026	0.682	0.809	0.743	1.101	0.99762	0.934549	0.883853	0.326825	0.358672	0.862898	99.1	117.7	95.9	87.4	6.87896e+07	5.39954e+07	6.35196e+07	7.53892e+07	6.66383e+07	9.50479e+07	6.0177e+07	6.14221e+07	6.95377e+07	4.49802e+07	5.5971e+07	6.45196e+07	High	High	High	High	High	High
Master Protein	I1N1K4	Amine oxidase OS=Glycine max OX=3847 GN=100783091 PE=3 SV=2	0	265.867	55	28	257	5	764	85.3	7.14	527.71	28	18	24	1.653	2.061	0.658	1.05	1.39	0.739	0.768787	0.724251	0.866715	0.938265	0.560985	0.699339	80.8	98.5	106	114.7	3.89737e+07	5.5944e+07	5.18208e+07	6.24344e+07	6.32059e+07	7.32289e+07	5.21178e+07	7.9114e+07	6.80005e+07	1.39498e+08	6.92012e+07	7.35808e+07	High	High	High	High	High	High
Master Protein	Q9SWB5	Seed maturation protein PM37 OS=Glycine max OX=3847 GN=PM37 PE=2 SV=1	0	265.685	56	18	227	10	417	46.3	6.28	594.28	18	12	8	1.397	1.57	0.696	0.943	1.06	0.899	0.927987	0.916317	0.896335	0.976957	0.997594	0.982511	83.6	109.3	103.4	103.7	1.27763e+08	1.25682e+08	1.0744e+08	1.44085e+08	1.64224e+08	1.772e+08	1.55333e+08	1.32179e+08	1.67867e+08	9.99409e+07	1.55913e+08	2.13854e+08	High	High	High	High	High	High
Master Protein	I1M5U8	MPN domain-containing protein OS=Glycine max OX=3847 GN=100804026 PE=4 SV=1	0	265.626	24	45	130	2	2358	275.7	8.7	248.05	45	13	42	1.857	2.171	0.696	1.213	1.47	0.814	0.694067	0.756314	0.934324	0.413897	0.447296	0.891284	76.2	89.9	111.5	122.4	9.74347e+06	1.87276e+07	1.81425e+07	2.14007e+07	2.2944e+07	1.87316e+07	1.85143e+07	3.6624e+07	2.65434e+07	5.61803e+07	2.91293e+07	2.59023e+07	Not Found	Not Found	Not Found	Peak Found	Peak Found	Not Found
Master Protein	Q6X0M9	Chalcone synthase OS=Glycine max OX=3847 GN=100791524 PE=2 SV=1	0	265.411	46	13	403	3	388	42.5	6.46	951.75	13	8	0	0.972	0.956	0.642	0.58	0.526	0.994	0.945795	0.942471	0.867515	0.00221251	0.0755042	0.973791	84.6	170.5	64.2	80.7	2.61379e+06	3.25062e+06	984593	5.7288e+06	2.90772e+06	5.26487e+06	4.76871e+06	1.74119e+06	1.98232e+06	1.68837e+06	2.49179e+06	3.15567e+06	High	High	Peak Found	High	High	High
Master Protein	I1MCE8	MPN domain-containing protein OS=Glycine max OX=3847 GN=100814404 PE=4 SV=2	0	265.407	24	45	130	2	2358	275.5	8.7	248.16	45	15	0	1.506	1.623	0.905	1.6	1.529	0.929	0.955519	0.959958	0.97785	0.314458	0.843498	0.997603	106.1	99	62.2	132.7	254304	568148	495033	593376	462236	421780	161085	801749	290312	1.20252e+06	220434	619450	Peak Found	Peak Found	Peak Found	Peak Found	Peak Found	Peak Found
Master Protein	I1MS24	SEC7 domain-containing protein OS=Glycine max OX=3847 GN=100782540 PE=4 SV=2	0	265.189	28	36	139	7	1782	197.6	5.54	235.08	36	17	0	2.551	3.754	0.419	1.255	2.277	0.569	0.560575	0.651515	0.625344	0.485586	0.0871119	0.283282	66.5	92	120.1	121.4	483536	1.19702e+06	1.19457e+06	1.65219e+06	1.96728e+06	1.4055e+06	1.48889e+06	2.3304e+06	2.15698e+06	4.84127e+06	2.06506e+06	2.18015e+06	Peak Found	Peak Found	Peak Found	High	High	Peak Found
Master Protein	I1LB04	S-adenosylmethionine synthase OS=Glycine max OX=3847 GN=100778809 PE=3 SV=1	0	265.137	43	13	544	3	389	42.6	5.69	1313.45	13	10	0	0.722	0.946	0.911	0.589	0.722	0.694	0.719451	0.934549	0.986228	0.000531415	0.320034	0.634951	78.2	171.6	58.2	91.9	2.56369e+06	4.21444e+07	5.55413e+06	4.38482e+06	1.26195e+07	1.21848e+07	578126	4.13197e+06	7.00797e+06	6.74957e+06	6.52741e+06	287289	High	High	High	High	High	High
Master Protein	A0A0R0JI98	EF1_GNE domain-containing protein OS=Glycine max OX=3847 GN=100777627 PE=3 SV=1	0	265.112	69	14	344	3	230	25	4.56	836.46	14	6	9	1.295	1.189	0.799	0.968	0.949	1.081	0.973215	0.986896	0.986228	0.995969	0.945154	0.884943	104.4	111	98.8	85.9	3.80337e+08	2.56009e+08	3.47225e+08	3.87198e+08	3.69185e+08	2.92354e+08	3.54244e+08	3.13927e+08	3.28722e+08	1.99554e+08	2.85822e+08	3.72843e+08	High	High	High	High	High	High
Master Protein	C6SXD0	Bet_v_1 domain-containing protein OS=Glycine max OX=3847 GN=100499848 PE=2 SV=1	0	264.935	89	12	1333	7	153	17.8	6.46	3512.71	12	8	0	1.125	1.168	0.915	1.076	0.971	1.068	0.973145	0.980821	0.968877	0.894413	0.962043	0.906458	106.8	98.9	115.2	79.1	9.34212e+08	1.16805e+09	1.01853e+09	8.21752e+08	9.42892e+08	1.18937e+09	9.03738e+08	1.09812e+09	1.11463e+09	1.22051e+09	7.1726e+08	7.54574e+08	High	High	High	High	High	High
Master Protein	A0A0R0H9T5	Peptidyl-prolyl cis-trans isomerase OS=Glycine max OX=3847 GN=GLYMA_12G024700 PE=3 SV=1	0	264.809	78	9	732	7	172	18.1	7.83	1799.2	9	12	0	0.789	0.401	1.197	1.018	0.524	1.943	0.583733	0.0709053	0.684766	0.987004	0.00400151	0.000811584	148	93.4	94.8	63.9	6.24755e+08	1.07056e+09	9.77156e+08	8.44664e+08	5.31425e+08	6.16978e+08	5.5645e+08	6.25781e+08	7.2633e+08	4.67656e+08	4.21726e+08	2.33496e+08	High	High	High	High	High	High
Master Protein	I1NBN5	Uncharacterized protein OS=Glycine max OX=3847 GN=100791083 PE=4 SV=1	0	264.741	39	29	163	5	1026	112.5	8.02	374.2	29	19	25	1.751	2.102	0.567	1.047	1.235	0.836	0.735209	0.79409	0.689512	0.951901	0.857568	0.922675	71.1	99.8	108.4	120.6	1.74003e+07	2.4343e+07	2.64955e+07	4.10156e+07	3.41642e+07	3.22865e+07	2.80256e+07	4.40954e+07	3.71079e+07	5.76786e+07	3.14088e+07	4.12878e+07	High	High	High	High	High	High
Master Protein	I1MXV5	GYF domain-containing protein OS=Glycine max OX=3847 GN=100813188 PE=4 SV=2	0	264.718	30	34	161	21	1783	195.2	6.4	337.73	34	17	12	2.208	2.358	0.487	0.933	1.187	0.865	0.477582	0.724406	0.522734	0.968908	0.916007	0.973791	68.7	120.8	99	111.4	1.89752e+07	1.42808e+07	1.26435e+07	1.74945e+07	2.51034e+07	2.54042e+07	3.01688e+07	1.78255e+07	2.05677e+07	1.92183e+07	2.3138e+07	2.39815e+07	High	High	High	High	High	High
Master Protein	I1K622	Uncharacterized protein OS=Glycine max OX=3847 GN=100790605 PE=3 SV=1	0	264.632	52	27	206	6	567	63.3	6.23	532.54	27	5	20	1.279	1.629	0.818	0.937	1.169	0.85	0.981337	0.916317	0.993568	0.967129	0.944949	0.95427	77	104.6	104.9	113.5	5.79669e+07	3.75123e+07	3.68605e+07	4.4677e+07	5.51325e+07	5.09286e+07	5.46102e+07	4.61752e+07	5.10933e+07	5.52582e+07	5.17977e+07	5.59327e+07	High	High	High	High	High	High
Master Protein	A0A0R0K6H9	Aldedh domain-containing protein OS=Glycine max OX=3847 GN=100817721 PE=3 SV=1	0	264.471	50	23	299	1	502	54.5	6.43	804.44	23	5	2	2.267	2.894	0.529	1.141	1.153	1.038	0.407974	0.55776	0.669375	0.73232	0.95827	0.934063	136.3	83.7	89.8	90.1	2.27189e+07	1.87826e+07	2.0688e+07	1.44216e+07	1.17273e+07	1.27023e+07	1.36289e+07	1.41925e+07	1.30287e+07	1.76954e+07	1.23599e+07	1.36729e+07	High	High	High	High	High	High
Master Protein	C6SX83	Nascent polypeptide-associated complex subunit beta OS=Glycine max OX=3847 GN=100499834 PE=2 SV=1	0	264.435	71	11	344	1	162	17.7	7.4	1237.78	11	11	0	1.345	1.751	0.589	0.848	1.031	0.698	0.973145	0.906456	0.761898	0.774155	0.988464	0.576579	71.2	120.9	83.2	124.7	6.32203e+06	7.56476e+06	4.10859e+06	7.48445e+06	1.19899e+07	1.07408e+07	7.25721e+06	7.38964e+06	1.01712e+07	6.83852e+06	1.10706e+07	1.45642e+07	High	High	Peak Found	High	High	High
Master Protein	A0A0R4J4H3	Nascent polypeptide-associated complex subunit beta OS=Glycine max OX=3847 GN=GLYMA_11G114000 PE=3 SV=1	0	264.435	71	11	340	1	162	17.7	7.4	1230.27	11	11	0	1.413	1.74	0.6	0.848	1.04	0.816	0.946065	0.914104	0.800158	0.745539	0.99655	0.932779	65.7	130.3	89.7	114.3	5.87456e+06	7.34427e+06	4.094e+06	6.16017e+06	1.22347e+07	1.1647e+07	8.01546e+06	7.1787e+06	1.03761e+07	7.19234e+06	1.02215e+07	1.2722e+07	High	High	High	High	High	High
Master Protein	A0A0R0H141	Nascent polypeptide-associated complex subunit beta OS=Glycine max OX=3847 GN=GLYMA_12G039900 PE=3 SV=1	0	264.435	71	11	340	1	161	17.5	8.32	1235.51	11	12	10	0.827	1.084	1.26	0.99	1.166	0.762	0.667393	0.95244	0.599791	0.997086	0.935624	0.743424	101.3	76	75	147.8	1.91068e+08	2.75177e+08	2.23304e+08	1.41651e+08	1.6767e+08	1.73801e+08	4.28811e+08	1.57495e+08	1.65294e+08	1.82287e+08	9.72624e+08	3.25828e+08	Peak Found	High	High	High	High	High
Master Protein	A0A0R0JWC4	U2 snRNP auxiliary factor large subunit OS=Glycine max OX=3847 GN=100793801 PE=3 SV=1	0	264.409	68	18	217	4	400	42.7	5.25	583.11	18	6	0	0.63	0.764	1.539	0.847	0.946	0.888	0.463016	0.779851	0.494015	0.74415	0.950455	0.982511	137.5	105.3	70.6	86.5	1.19213e+07	1.10383e+07	9.63307e+06	5.19283e+06	8.45635e+06	1.08191e+07	5.66925e+06	5.70155e+06	4.91453e+06	8.74166e+06	6.94761e+06	5.0275e+06	High	High	High	High	High	High
Master Protein	K7LB48	Aminomethyltransferase OS=Glycine max OX=3847 GN=GLYMA_09G004700 PE=3 SV=1	0	264.391	64	21	310	3	432	47.1	8.56	798.58	21	9	0	0.936	0.805	0.967	0.905	0.898	0.914	0.898502	0.889591	0.969916	0.931045	0.91688	0.991509	77.7	121.4	112.4	88.5	7.55384e+06	5.60066e+06	5.15957e+06	8.61931e+06	8.75121e+06	9.43463e+06	7.18646e+06	9.28394e+06	8.10625e+06	5.85412e+06	8.89356e+06	6.38399e+06	High	High	High	High	High	High
Master Protein	I1KNF5	Aminomethyltransferase OS=Glycine max OX=3847 GN=100778188 PE=3 SV=1	0	264.265	68	21	346	4	407	44.3	8.46	918.44	21	7	0	0.826	0.757	1.168	1.012	0.993	0.977	0.73998	0.775884	0.737357	0.987496	0.971001	0.982511	112.3	107.9	97	82.8	1.68627e+07	1.88465e+07	2.28879e+07	1.81118e+07	1.71791e+07	1.94983e+07	1.46842e+07	2.01243e+07	1.6272e+07	1.02484e+07	1.91336e+07	1.38844e+07	High	High	High	High	High	High
Master Protein	I1KL89	Aminotran_1_2 domain-containing protein OS=Glycine max OX=3847 GN=100801405 PE=3 SV=1	0	264.193	62	22	310	2	458	49.8	6.65	896.88	22	7	0	0.725	0.921	1.267	0.88	0.989	0.886	0.678379	0.924487	0.775295	0.862115	0.983775	0.982511	119.3	94.9	97.9	87.9	5.47836e+06	8.22877e+06	7.18742e+06	6.18988e+06	5.71434e+06	5.30512e+06	6.33408e+06	5.89738e+06	4.62087e+06	5.69389e+06	5.29196e+06	5.1209e+06	High	High	High	High	High	High
Master Protein	I1LB48	Lon protease homolog, mitochondrial OS=Glycine max OX=3847 GN=100802878 PE=3 SV=2	0	264.063	40	31	211	11	961	106.8	5.91	430.51	31	10	20	1.441	1.531	0.733	0.975	1.137	0.845	0.915979	0.938515	0.947228	0.997086	0.963982	0.935549	82.6	103	101.6	112.8	4.11381e+07	3.4807e+07	3.2092e+07	4.34203e+07	5.50718e+07	3.89289e+07	3.77903e+07	4.28545e+07	4.49743e+07	4.13195e+07	4.75568e+07	6.40929e+07	High	High	High	High	High	High
Master Protein	A0A368UHG2	NAD(P)-bd_dom domain-containing protein OS=Glycine max OX=3847 GN=GLYMA_11G141200 PE=4 SV=1	0	263.935	69	17	317	3	342	38.7	7.9	949.42	17		0	1.061	0.976	0.832	0.821	0.851	1.022	0.954979	0.915777	0.999636	0.648337	0.786358	0.946232	91.5	115.4	90.5	102.6	1.01316e+07	9.39474e+06	1.02739e+07	1.27832e+07	1.36706e+07	1.18492e+07	1.0022e+07	9.52711e+06	1.41777e+07	2.23558e+06	1.13682e+07	1.22983e+07	High	High	High	High	High	High
Master Protein	I1JXC1	Elongation factor Tu OS=Glycine max OX=3847 GN=100805960 PE=3 SV=1	0	263.611	58	19	208	3	480	52.2	6.68	608.41	19	4	5	2.428	2.362	0.541	1.175	1.472	0.796	0.406554	0.737326	0.714859	0.615506	0.490766	0.865929	54.8	104.7	116.1	124.4	1.02857e+07	7.02273e+06	6.17623e+06	1.34059e+07	1.06938e+07	1.39673e+07	1.30868e+07	2.0463e+07	1.4877e+07	1.32011e+07	2.11489e+07	1.59335e+07	High	High	Peak Found	High	High	High
Master Protein	I1K5F2	Tr-type G domain-containing protein OS=Glycine max OX=3847 GN=100784412 PE=4 SV=1	0	263.573	56	27	191	1	504	56.1	5.17	448.39	27	5	6	4.695	6.522	0.284	0.942	1.41	0.694	0.017379	0.0205098	0.0435349	0.979603	0.628168	0.524763	30.3	101.5	105.2	162.9	2.96311e+06	4.04593e+06	1.83506e+06	7.51118e+06	9.9104e+06	1.11669e+07	1.06904e+07	6.02626e+06	1.0275e+07	1.7015e+07	9.98599e+06	1.59068e+07	Peak Found	Peak Found	Peak Found	High	High	High
Master Protein	I1M261	Amidohydro-rel domain-containing protein OS=Glycine max OX=3847 GN=100810258 PE=4 SV=1	0	263.038	59	20	219	6	513	56.7	5.85	606.93	20	13	0	0.942	0.778	1.232	1.064	0.882	1.231	0.880518	0.814201	0.772344	0.955614	0.851025	0.543467	126.1	100.7	100	73.2	1.04037e+07	1.51195e+07	1.5421e+07	1.25105e+07	1.20778e+07	1.06007e+07	9.77822e+06	1.66598e+07	1.19909e+07	8.7848e+06	1.06351e+07	3.60429e+06	High	High	High	High	High	High
Master Protein	I1N5R9	Formate dehydrogenase, mitochondrial OS=Glycine max OX=3847 GN=100796009 PE=3 SV=1	0	262.919	71	17	185	7	375	41.3	7.34	469.33	17	19	0	1.918	3.953	0.479	0.821	1.853	0.423	0.704744	0.266537	0.537275	0.657979	0.0478827	0.000203827	41.1	98.2	86.8	173.9	6.54729e+06	4.23124e+06	3.59766e+06	9.363e+06	1.07826e+07	1.00979e+07	5.70144e+06	9.76461e+06	8.92286e+06	1.78878e+07	2.3236e+07	1.12016e+07	High	Peak Found	High	High	High	High
Master Protein	K7MQF6	Uridine kinase OS=Glycine max OX=3847 GN=GLYMA_18G073400 PE=3 SV=1	0	262.693	61	24	202	1	477	53.8	6.27	511.53	24	18	24	1.155	1.51	0.659	0.774	1.127	0.72	0.983748	0.943279	0.859912	0.202737	0.965289	0.571962	106.8	110.2	80.9	102.1	4.42304e+07	4.53372e+07	3.59854e+07	4.92321e+07	3.96852e+07	4.56204e+07	3.35058e+07	4.03198e+07	2.95031e+07	6.37792e+07	3.94347e+07	4.22534e+07	Peak Found	Peak Found	Peak Found	Peak Found	High	Peak Found
Master Protein	I1JT95	Uncharacterized protein OS=Glycine max OX=3847 GN=100777972 PE=4 SV=1	0	262.628	80	18	274	9	276	30	6.71	716.07	18	4	10	0.913	0.82	1.106	0.937	0.985	0.932	0.809516	0.783312	0.794715	0.967018	0.966604	0.997906	105.1	97.1	95.6	102.3	2.29288e+08	1.54085e+08	1.43287e+08	1.42343e+08	1.62141e+08	1.35578e+08	1.19203e+08	1.65685e+08	1.40216e+08	1.49974e+08	1.45528e+08	1.51499e+08	High	High	High	High	High	High
Master Protein	A0A0R0KFI8	Uncharacterized protein OS=Glycine max OX=3847 GN=GLYMA_03G068700 PE=4 SV=1	0	262.613	83	22	240	10	342	38.4	6.2	636.93	22	3	12	1.036	1.081	0.957	0.985	0.992	0.97	0.921701	0.949676	0.942391	0.999892	0.972634	0.982511	89.3	104.2	97.9	108.6	6.76962e+07	6.31488e+07	5.93401e+07	6.28399e+07	8.01261e+07	7.37079e+07	6.92669e+07	6.85328e+07	7.44226e+07	6.77795e+07	7.6804e+07	8.66495e+07	High	High	High	High	High	High
Master Protein	I1KGC2	Protein ROOT HAIR DEFECTIVE 3 homolog OS=Glycine max OX=3847 GN=100777656 PE=3 SV=1	0	262.605	42	27	157	7	808	89.7	5.55	319.5	27	7	0	0.942	0.969	1.039	0.989	1.003	1.015	0.884234	0.912646	0.915434	0.999252	0.972832	0.944988	101.1	99.9	102.7	96.4	8.77454e+06	1.12965e+07	9.32613e+06	1.11928e+07	8.75303e+06	9.21348e+06	7.91281e+06	1.03247e+07	9.47049e+06	8.8907e+06	8.57757e+06	9.45632e+06	High	High	High	High	High	High
Master Protein	I1LDE9	Uncharacterized protein OS=Glycine max OX=3847 GN=100806256 PE=3 SV=1	0	262.478	48	19	347	2	389	44.4	10.17	877.94	19	10	2	2.269	2.653	0.477	0.975	1.191	0.752	0.437209	0.609428	0.502949	0.996259	0.91688	0.785603	41.4	112.4	116.5	129.7	7.77407e+06	1.26945e+07	8.01983e+06	2.17957e+07	2.59189e+07	2.05788e+07	1.47591e+07	2.54362e+07	2.25904e+07	2.04779e+07	2.93085e+07	2.51411e+07	High	High	High	High	High	High
Master Protein	A0A0R0GHN2	AAA domain-containing protein OS=Glycine max OX=3847 GN=100785863 PE=3 SV=1	0	262.331	65	22	294	1	399	44.6	8.19	722.45	22	14	0																													High	Not Found	Not Found	Not Found	Not Found	Not Found
Master Protein	I1JNF2	Adenylosuccinate synthetase, chloroplastic OS=Glycine max OX=3847 GN=100811618 PE=3 SV=1	0	262.155	60	22	236	5	486	52.9	7.61	638.2	22	3	17	1.09	0.776	0.993	0.968	0.888	1.139	0.955199	0.719839	0.912815	0.996018	0.866429	0.787915	114.5	109.4	98.3	77.7	1.17797e+08	1.1425e+08	1.22334e+08	1.13155e+08	1.01799e+08	1.12519e+08	8.78352e+07	1.12846e+08	1.01128e+08	7.98972e+07	8.58135e+07	6.73639e+07	High	High	High	High	High	High
Master Protein	I1KYU6	Alpha-1,4 glucan phosphorylase OS=Glycine max OX=3847 GN=100789789 PE=3 SV=1	0	262.148	43	26	143	26	846	95.8	6.43	368.14	26	8	0	0.939	0.705	1.009	1.126	0.78	1.399	0.847284	0.641482	0.91274	0.736211	0.550016	0.312389	147.5	95.8	104	52.8	4.61244e+07	2.63569e+07	4.36211e+07	4.3824e+07	2.83337e+07	2.71199e+07	3.18751e+07	2.71677e+07	3.07663e+07	2.66572e+07	1.56058e+07	1.54076e+07	High	High	High	High	High	High
Master Protein	A0A0R0JQZ9	Uncharacterized protein OS=Glycine max OX=3847 GN=GLYMA_05G046900 PE=3 SV=1	0	261.842	68	24	265	3	404	44.5	5.66	611.69	24		0	1.318	1.103	0.739	0.933	0.712	1.243	0.972316	0.967593	0.966709	0.97824	0.608908	0.690243	96	109.9	108.8	85.4	2.24716e+06	2.19584e+06	1.63698e+06	2.97006e+06	2.42848e+06	2.51323e+06	1.74911e+06	2.48778e+06	2.74757e+06	1.27652e+06	1.95251e+06	2.61208e+06	High	Peak Found	High	High	High	High
Master Protein	A0A0R4J305	AAA domain-containing protein OS=Glycine max OX=3847 GN=100788475 PE=3 SV=1	0	261.8	68	23	306	2	398	44.6	8.19	735.64	23	4; 6	21	1.372	1.446	0.738	1.006	1.114	0.913	0.94041	0.959797	0.942924	0.99582	0.965028	0.989404	104	100.1	103.9	92	1.03777e+08	7.62423e+07	9.75614e+07	9.39722e+07	9.52916e+07	8.4775e+07	9.75077e+07	8.22882e+07	1.09669e+08	7.48788e+07	1.04113e+08	8.63262e+07	High	High	Peak Found	High	High	High
Master Protein	I1J7T0	Pectinesterase OS=Glycine max OX=3847 GN=100782892 PE=3 SV=1	0	261.662	54	18	363	7	515	56.5	9.01	872.79	18	1	10	1.643	1.851	0.929	1.258	1.309	0.974	0.774143	0.801259	0.959153	0.157487	0.730449	0.983378	109.8	85.9	98	106.3	2.85591e+08	2.53467e+08	2.80465e+08	2.15722e+08	2.19426e+08	2.49298e+08	2.50255e+08	2.50345e+08	2.78839e+08	2.95476e+08	2.56597e+08	2.71525e+08	High	High	High	High	High	High
Master Protein	I1M5P5	Uncharacterized protein OS=Glycine max OX=3847 GN=100777295 PE=3 SV=1	0	261.59	23	27	222	3	1426	160.8	7.72	540.7	27	13	0	1.554	2.334	0.723	1.247	1.993	0.606	0.87391	0.784762	0.963034	0.548224	0.14451	0.431796	83.8	91.1	110.9	114.2	1.7014e+06	2.48198e+06	2.58912e+06	3.53776e+06	2.58684e+06	2.69861e+06	2.42875e+06	4.31028e+06	3.28491e+06	7.15697e+06	3.38387e+06	932267	Peak Found	High	High	High	High	High
Master Protein	A0A0R0FLG8	Alpha-mannosidase OS=Glycine max OX=3847 GN=GLYMA_16G048100 PE=3 SV=1	0	261.512	39	29	224	24	1011	115	5.91	536.12	29	16	1	1.657	1.903	0.58	0.99	1.015	0.989	0.774138	0.819619	0.68355	0.996239	0.984995	0.982511	76.7	103.3	114.9	105.1	3.31715e+07	2.77775e+07	3.78887e+07	3.91857e+07	4.46952e+07	4.87166e+07	5.29764e+07	4.97291e+07	4.04366e+07	4.55016e+07	4.15987e+07	5.02026e+07	High	High	High	High	High	High
Master Protein	I1LGX2	Helicase ATP-binding domain-containing protein OS=Glycine max OX=3847 GN=100793750 PE=4 SV=1	0	261.166	41	34	160	3	1268	138.8	6.84	314.97	34	11	0	2.451	5.876	0.738	0.855	1.34	0.645	0.664379	0.378326	0.989669	0.93802	0.91688	0.655954	20.5	104.2	111.4	164	13357.2	167876	215008	853304	948921	644850	1.09038e+06	912407	708831	1.34352e+06	686368	1.8119e+06	Peak Found	Peak Found	Peak Found	High	Peak Found	High
Master Protein	I1LDJ1	Pyruvate kinase OS=Glycine max OX=3847 GN=100818193 PE=3 SV=1	0	261.119	51	21	236	3	578	63.7	7.62	528.45	21	10	8	1.552	1.853	0.712	0.982	1.03	0.962	0.877136	0.886571	0.943128	0.998327	0.996877	0.983378	95	99.4	112	93.6	1.64106e+07	1.60924e+07	1.39131e+07	1.63413e+07	2.12629e+07	1.68369e+07	1.93107e+07	1.21572e+07	1.89655e+07	1.98008e+07	1.58465e+07	1.4033e+07	Peak Found	Peak Found	High	High	Peak Found	Peak Found
Master Protein	C6TNF9	Pyr_redox_2 domain-containing protein OS=Glycine max OX=3847 GN=100813980 PE=2 SV=1	0	260.863	60	17	634	5	360	39.1	9.38	1213.74	17	12	0	1.791	4.624	0.426	0.774	2.001	0.395	0.774138	0.110739	0.331057	0.281246	0.00977925	1.76107e-05	35.8	100.8	75.4	188	1.29634e+07	6.90306e+06	8.69323e+06	1.39242e+07	2.84009e+07	2.45135e+07	1.83372e+07	2.0676e+07	1.22233e+07	3.30739e+07	4.56975e+07	5.7373e+07	High	High	High	High	High	High
Master Protein	I1LC96	Uncharacterized protein OS=Glycine max OX=3847 GN=GLYMA_10G184900 PE=4 SV=1	0	260.709	56	17	206	17	464	49.8	5.52	663.48	17	10	0	1.342	1.079	0.725	0.89	0.837	1.007	0.954717	0.95244	0.933106	0.840277	0.730873	0.969878	90	110.9	100.9	98.2	1.13436e+08	9.87211e+07	9.78023e+07	1.18912e+08	1.21572e+08	1.42012e+08	1.04582e+08	1.31379e+08	1.10571e+08	8.09622e+07	1.14813e+08	1.07688e+08	High	High	High	High	High	High
Master Protein	I1LGI7	3-hydroxy-3-methylglutaryl coenzyme A synthase OS=Glycine max OX=3847 GN=GLYMA_11G027000 PE=3 SV=1	0	260.457	52	16	196	3	475	52.4	6.13	579.04	16	11	13	0.741	0.461	1.186	0.894	0.55	1.569	0.4738	0.156435	0.694793	0.854521	0.0110168	0.0562647	138.8	101.7	96.7	62.7	1.13748e+08	1.20421e+08	8.41049e+07	1.03645e+08	8.20436e+07	8.33461e+07	1.10553e+08	5.75e+07	7.92552e+07	5.13932e+07	5.2644e+07	4.5762e+07	High	High	High	High	High	High
Master Protein	I1JKP7	3-phosphoshikimate 1-carboxyvinyltransferase OS=Glycine max OX=3847 GN=100811089 PE=3 SV=1	0	260.156	44	16	322	5	526	55.8	6.73	782.7	16	3	0	0.989	0.921	0.829	0.897	0.751	1.15	0.902269	0.883113	0.998779	0.906675	0.433664	0.803561	99.2	112.8	95.1	92.9	2.85881e+07	2.34095e+07	2.44741e+07	2.6568e+07	2.78506e+07	2.83293e+07	2.6344e+07	2.34741e+07	2.31965e+07	1.38937e+07	2.29194e+07	2.76705e+07	High	High	High	High	High	High
Master Protein	K7LI85	Amine oxidase OS=Glycine max OX=3847 GN=100804651 PE=3 SV=1	0	260.134	34	21	241	14	734	82.9	6.46	570.01	21	10	0	1.123	0.881	0.781	0.937	0.864	1.169	0.975754	0.867693	0.994127	0.97824	0.838377	0.737567	101.7	112.6	102.7	82.9	2.17e+07	2.33314e+07	2.34149e+07	2.58159e+07	2.73896e+07	2.40875e+07	2.10129e+07	2.52811e+07	2.35597e+07	1.61786e+07	1.9018e+07	2.20231e+07	High	High	High	High	High	High
Master Protein	I1KC45	AAA domain-containing protein OS=Glycine max OX=3847 GN=100778164 PE=4 SV=2	0	259.895	33	28	173	6	1205	130.4	6.28	390.78	28	6	0	1.052	1.062	0.749	0.871	0.889	1.018	0.97319	0.963614	0.975697	0.873369	0.931407	0.958248	92.1	116.8	95.3	95.9	2.08577e+06	2.49162e+06	1.53661e+06	2.93161e+06	2.64543e+06	2.60323e+06	2.56454e+06	1.91506e+06	2.15843e+06	711102	2.17258e+06	2.76401e+06	High	High	High	High	High	High
Master Protein	I1JSS2	Dolichyl-diphosphooligosaccharide--protein glycosyltransferase subunit 1 OS=Glycine max OX=3847 GN=100796192 PE=3 SV=2	0	259.687	43	22	220	10	619	69	8.34	564.41	22	4	0	1.2	1.277	0.689	0.851	0.886	0.923	0.99762	0.990106	0.937389	0.757844	0.86892	0.999972	119.7	105.3	91.7	83.2	1.89705e+07	3.62487e+07	2.14833e+07	2.66548e+07	1.8903e+07	1.80378e+07	1.46452e+07	2.15416e+07	1.6456e+07	1.49307e+07	1.59581e+07	1.06356e+07	High	High	High	High	High	High
Master Protein	I1MUS3	RmlD_sub_bind domain-containing protein OS=Glycine max OX=3847 GN=100781643 PE=4 SV=1	0	259.64	72	15	238	13	302	33.7	6.54	648.97	15	17	3	0.749	0.605	1.307	1.093	0.844	1.452	0.494344	0.409441	0.521557	0.829518	0.749418	0.130681	127.1	91.5	117.8	63.6	2.18301e+08	1.32927e+08	1.52941e+08	1.25466e+08	1.10066e+08	9.6647e+07	1.42743e+08	7.94283e+07	1.41672e+08	7.00513e+07	1.19472e+08	7.64598e+07	High	High	High	High	High	High
Master Protein	I1LJE0	Adenylyl cyclase-associated protein OS=Glycine max OX=3847 GN=100793194 PE=3 SV=1	0	259.624	70	24	227	6	469	50.6	6.8	655.05	24	11	0	1.147	0.853	0.834	0.916	0.79	1.079	0.987113	0.868933	0.999879	0.950093	0.576717	0.883401	107.2	96	102.1	94.6	1.57958e+07	1.47251e+07	1.31404e+07	1.69614e+07	1.3197e+07	1.22745e+07	2.55154e+07	1.40351e+07	1.19449e+07	1.35273e+07	1.30038e+07	7.82343e+06	High	High	High	High	High	High
Master Protein	I1L5G4	Amidophosphoribosyltransferase OS=Glycine max OX=3847 GN=100791919 PE=3 SV=1	0	259.479	54	22	183	7	573	62	6.84	566.18	22	9	0	1.306	1.659	0.868	1.076	1.352	0.817	0.984022	0.933971	0.998779	0.938265	0.750392	0.919741	87.7	83.3	91.6	137.4	6.67465e+06	8.92828e+06	8.63064e+06	9.19535e+06	7.10393e+06	8.20465e+06	1.39547e+07	9.01909e+06	8.15458e+06	1.8644e+07	1.35297e+07	7.08594e+06	High	High	High	High	High	High
Master Protein	C6TMQ6	PHB domain-containing protein OS=Glycine max OX=3847 GN=100809006 PE=2 SV=1	0	259.246	66	21	311	6	404	44	9.2	737.06	21	6	19	1.714	2.078	0.621	0.989	1.128	0.882	0.711622	0.71809	0.761898	0.997086	0.962043	0.975139	79.7	104.9	101.6	113.8	8.1563e+07	7.28402e+07	7.95843e+07	8.8309e+07	1.20345e+08	1.04714e+08	1.01411e+08	9.88832e+07	1.12397e+08	9.94965e+07	1.1357e+08	1.28984e+08	High	High	High	High	High	High
Master Protein	C6ZRT7	Serine/threonine protein kinase OS=Glycine max OX=3847 GN=548003 PE=2 SV=1	0	259.231	60	17	158	2	366	40.3	7.99	474.27	17	20	14	0.888	0.793	1.043	0.946	0.829	1.096	0.774138	0.74847	0.877525	0.980625	0.670814	0.855442	118.9	105.2	97.3	78.6	7.68614e+07	8.4676e+07	8.76101e+07	7.49651e+07	7.20841e+07	7.82672e+07	6.92918e+07	7.12447e+07	6.86526e+07	4.89287e+07	6.52303e+07	5.59722e+07	High	High	High	Peak Found	High	High
Master Protein	I1L903	Isocitrate dehydrogenase [NAD] subunit, mitochondrial OS=Glycine max OX=3847 GN=100781465 PE=3 SV=1	0	259.144	55	18	267	2	359	39.4	7.49	749.64	18	10	15	1.293	1.125	0.795	1.009	1.054	0.966	0.974164	0.966789	0.986228	0.993579	0.999952	0.984782	82.8	102.2	107.3	107.7	1.84406e+08	1.40466e+08	1.58719e+08	1.65926e+08	1.95837e+08	2.00542e+08	2.08011e+08	1.99551e+08	2.05574e+08	1.15521e+08	2.06349e+08	2.17627e+08	High	High	High	High	High	High
Master Protein	I1LIT1	Uncharacterized protein OS=Glycine max OX=3847 GN=100785606 PE=4 SV=1	0	258.713	65	15	209	4	392	41.3	8.75	641.14	15	11	5	1.064	1.191	0.997	1.061	1.133	0.941	0.946065	0.974561	0.91228	0.93802	0.962043	0.997906	99.8	98.1	102	100	3.58752e+07	3.22837e+07	3.0268e+07	3.17242e+07	3.27773e+07	2.70519e+07	4.23664e+07	3.16732e+07	3.29973e+07	2.21974e+07	3.23502e+07	3.3812e+07	High	High	High	High	High	High
Master Protein	A0A0R0GGN1	Uncharacterized protein OS=Glycine max OX=3847 GN=100795195 PE=3 SV=1	0	258.653	43	21	250	21	783	84	9.31	714.53	21	14	0	1.811	1.195	0.627	1.146	0.916	1.18	0.625455	0.980187	0.771337	0.62201	0.915008	0.686375	71.5	114.5	136.5	77.5	1.7313e+08	8.92665e+07	7.46549e+07	1.19017e+08	1.74466e+08	1.43076e+08	1.53905e+08	1.70573e+08	1.90793e+08	4.5833e+07	1.71411e+08	9.68212e+07	High	High	High	High	High	High
Master Protein	I1LDZ8	Aldo_ket_red domain-containing protein OS=Glycine max OX=3847 GN=GLYMA_10G243600 PE=4 SV=1	0	258.356	79	18	188	16	344	37.7	6.29	586.03	18	10	2	2.121	2.422	0.573	1.094	1.139	1.006	0.349821	0.475366	0.63659	0.826824	0.956332	0.97102	152.8	141.8	93.5	11.9	8.90984e+08	1.86764e+09	1.27536e+09	1.34699e+09	1.18334e+09	9.95602e+07	4.09612e+08	1.00358e+09	7.8001e+08	9.91295e+07	1.00926e+09	9.06601e+07	High	High	High	High	High	High
Master Protein	I1M8Q5	Uncharacterized protein OS=Glycine max OX=3847 GN=GLYMA_14G085800 PE=3 SV=2	0	258.225	33	16	437	6	496	54.4	6.02	1257	16	14	0	1.226	0.847	0.965	1.03	1.143	0.987	0.99762	0.828393	0.934791	0.971795	0.952107	0.974485	99.6	110.2	113.6	76.6	8.08329e+07	7.64252e+07	7.65574e+07	9.0046e+07	8.18987e+07	8.47087e+07	8.73705e+07	1.10148e+08	8.22105e+07	5.89144e+07	1.01022e+08	5.24813e+07	High	High	High	High	High	High
Master Protein	I1J9N5	Helicase ATP-binding domain-containing protein OS=Glycine max OX=3847 GN=100795594 PE=4 SV=1	0	258.137	40	34	168	3	1266	138.5	6.86	311.85	34	1	30	1.232	1.091	0.766	0.905	0.946	0.95	0.99762	0.943846	0.97071	0.921549	0.94553	0.997748	89.9	109.4	102.7	98	3.64724e+07	3.30646e+07	2.88956e+07	4.02185e+07	4.0903e+07	4.00901e+07	3.77528e+07	3.95114e+07	3.24113e+07	3.43056e+07	3.60455e+07	4.2115e+07	High	High	Peak Found	Peak Found	High	High
Master Protein	I1KZY9	Fumarylacetoacetase OS=Glycine max OX=3847 GN=GLYMA_09G010000 PE=3 SV=1	0	258.087	74	19	245	9	421	45.8	6.28	732.67	19	9	10	1.643	1.377	0.705	1.075	0.909	1.206	0.774143	0.967593	0.911306	0.896189	0.907978	0.617519	90.7	101.8	109.2	98.3	1.04942e+08	1.07166e+08	8.86133e+07	1.17788e+08	1.12637e+08	1.32295e+08	1.48185e+08	1.1107e+08	1.26432e+08	1.19127e+08	9.77076e+07	1.13777e+08	High	High	High	High	High	High
Master Protein	K7N1Q0	Uncharacterized protein OS=Glycine max OX=3847 GN=100820376 PE=4 SV=1	0	257.998	45	32	201	29	947	106.1	8.69	480.97	32	20	3	1.181	1.216	0.831	1.01	0.99	0.978	0.996641	0.990055	0.999318	0.992472	0.966604	0.982511	105.2	106	98.6	90.2	7.03314e+07	6.43397e+07	7.61212e+07	7.33089e+07	7.085e+07	6.31819e+07	6.05152e+07	8.77728e+07	6.59541e+07	6.99363e+07	6.03255e+07	5.76545e+07	High	High	High	High	High	High
Master Protein	I1KQH1	Tr-type G domain-containing protein OS=Glycine max OX=3847 GN=GLYMA_08G051200 PE=4 SV=1	0	257.81	55	27	202	7	504	56.3	5.26	495.59	27	8	20	2.068	2.892	0.68	1.02	1.415	0.737	0.390347	0.330738	0.892843	0.981758	0.504502	0.690243	71.2	92.6	100.2	136	5.66106e+07	5.1978e+07	4.60353e+07	6.79467e+07	6.41291e+07	6.75904e+07	7.37815e+07	7.22102e+07	7.31845e+07	1.20165e+08	7.12698e+07	9.92602e+07	High	High	High	High	High	High
Master Protein	I1KTQ4	Citrate synthase OS=Glycine max OX=3847 GN=100781418 PE=3 SV=1	0	257.759	56	20	274	20	472	52.5	8.25	764.17	20	8	0	1.369	1.405	0.713	1.086	1.156	0.882	0.942381	0.960385	0.913701	0.853067	0.944949	0.975139	87.4	92.6	108.8	111.3	8.93385e+07	9.19406e+07	1.19574e+08	9.73586e+07	1.13773e+08	9.46219e+07	9.33416e+07	1.14398e+08	1.17563e+08	1.3215e+08	1.17076e+08	1.0251e+08	High	High	High	High	High	High
Master Protein	Q03773	Glucan endo-1,3-beta-glucosidase OS=Glycine max OX=3847 PE=1 SV=1	0	257.49	67	15	321	12	347	38.1	8.69	950.79	15	3	3	0.524	0.284	1.473	0.94	0.437	2.229	0.0688688	0.00632786	0.311762	0.968078	7.46911e-05	2.5835e-05	171	91.4	97.5	40.1	3.10652e+08	4.49047e+08	3.01097e+08	2.53122e+08	1.6364e+08	1.66001e+08	1.78554e+08	1.24397e+08	1.77053e+08	7.34641e+07	6.69249e+07	7.27721e+07	High	High	High	High	High	High
Master Protein	A0A0R0H3J2	Serine/threonine-protein phosphatase OS=Glycine max OX=3847 GN=100776048 PE=3 SV=1	0	256.959	45	30	154	3	988	105.2	5.66	402.91	30	13	26	1.43	1.593	0.745	0.98	1.027	0.923	0.917034	0.939854	0.955102	0.996239	0.994916	0.990145	104.2	109.4	102.5	83.9	2.92407e+07	2.55727e+07	3.06067e+07	3.10698e+07	2.73875e+07	3.07081e+07	2.8764e+07	3.1906e+07	2.73688e+07	3.26637e+07	2.35524e+07	2.26938e+07	High	High	High	High	High	High
Master Protein	K7K8K0	AAA domain-containing protein OS=Glycine max OX=3847 GN=100801477 PE=4 SV=1	0	256.69	27	23	132	2	1243	134.7	6.77	311.89	23	2	1	0.623	0.567	1.339	0.815	0.682	1.149	0.650933	0.716874	0.814697	0.781864	0.60899	0.886506	130.3	84.5	106.8	78.4	1.19796e+06	2.16907e+06	1.34583e+06	1.5955e+06	872885	867021	1.02448e+06	1.74846e+06	1.10256e+06	582806	813887	809195	High	High	High	High	Peak Found	High
Master Protein	I1KMS9	Uncharacterized protein OS=Glycine max OX=3847 GN=GLYMA_07G241600 PE=4 SV=1	0	256.652	52	18	237	2	570	60.3	7.72	709.59	18	7	16	0.698	0.643	1.334	0.942	0.964	1.029	0.370476	0.500535	0.494015	0.969484	0.952417	0.951518	143.3	88	84.1	84.7	9.18512e+07	9.9996e+07	8.60129e+07	7.5893e+07	5.63899e+07	5.44827e+07	7.89991e+07	5.01817e+07	5.39134e+07	5.66957e+07	5.43091e+07	5.03211e+07	High	High	High	High	High	High
Master Protein	I1LWB8	EF1_GNE domain-containing protein OS=Glycine max OX=3847 GN=GLYMA_13G073200 PE=3 SV=1	0	256.33	66	11	247	8	224	24.2	4.65	624.58	11	13	0	1.635	1.25	0.595	1.019	0.892	1.166	0.78154	0.999972	0.697158	0.985122	0.870729	0.715093	90.1	105.2	111.6	93	1.79159e+08	1.68417e+08	1.433e+08	1.96725e+08	2.10322e+08	1.88141e+08	2.0868e+08	1.81389e+08	2.18149e+08	1.02651e+08	1.73836e+08	2.15831e+08	High	High	High	High	High	High
Master Protein	I1LZ62	S-adenosylmethionine synthase OS=Glycine max OX=3847 GN=100805448 PE=3 SV=1	0	256.225	45	14	1111	3	390	42.6	6.25	2863.97	14	13	0	1.442	1.452	0.93	0.991	0.987	1.002	0.917207	0.961859	0.984907	0.997086	0.982983	0.982511	104.7	114.6	87.5	93.2	4.45642e+06	4.36948e+06	3.14084e+06	4.72252e+06	4.78263e+06	5.19807e+06	3.65258e+06	3.50792e+06	4.03687e+06		4.0951e+06	3.69781e+06	High	High	High	High	High	Peak Found
Master Protein	A0A0R0FS66	Uncharacterized protein OS=Glycine max OX=3847 GN=100810148 PE=4 SV=1	0	256.136	36	24	164	14	975	106.7	4.79	461.03	24	16	10	1.331	1.072	0.715	0.942	0.857	1.118	0.962363	0.938515	0.933813	0.980533	0.792469	0.834697	84.7	112.5	107.6	95.1	2.7075e+07	2.46641e+07	2.79883e+07	3.32011e+07	3.59642e+07	3.70192e+07	3.88612e+07	3.43931e+07	3.26279e+07	1.50629e+07	3.19207e+07	3.0397e+07	High	High	High	High	High	High
Master Protein	I1L7R5	Protein disufide isomerase-like protein OS=Glycine max OX=3847 GN=Gm pdis-1a PE=2 SV=2	0	256.037	54	17	393	6	364	40.3	5.92	1181.31	17	10	11	0.842	0.921	1.199	0.986	0.978	1.003	0.691097	0.882437	0.682357	0.999892	0.963982	0.973791	118.1	93.4	93.9	94.6	3.30632e+08	3.78962e+08	3.84079e+08	2.78221e+08	3.00609e+08	2.99769e+08	3.09857e+08	2.75613e+08	3.01379e+08	1.98613e+08	3.17336e+08	3.0371e+08	High	High	High	High	High	High
Master Protein	K7MP05	Uncharacterized protein OS=Glycine max OX=3847 GN=GLYMA_17G256100 PE=4 SV=1	0	255.982	28	18	244	2	959	108	8.72	533.39	18	17	18	1.447	2.365	0.75	1.112	1.277	0.913	0.899193	0.572198	0.955983	0.757563	0.788903	0.986181	88	92.9	101.7	117.3	9.15695e+07	7.83711e+07	7.94813e+07	8.31667e+07	8.38585e+07	8.9765e+07	1.09593e+08	8.38984e+07	9.18264e+07	1.05935e+08	9.27102e+07	1.09489e+08	Peak Found	High	High	High	High	High
Master Protein	C6TLT7	Late-embryogenesis abundant protein 1 OS=Glycine max OX=3847 GN=100802292 PE=2 SV=1	0	255.809	67	16	287	5	320	35.6	4.98	813.46	16	14	13	0.955	0.808	1.175	1.06	0.937	1.177	0.857366	0.771808	0.710465	0.928966	0.935624	0.690243	126.1	87.4	104.9	81.6	1.56031e+08	2.00723e+08	2.29405e+08	1.34704e+08	1.48008e+08	1.39165e+08	2.01893e+08	1.40517e+08	1.66987e+08	9.4816e+07	1.48816e+08	1.2985e+08	High	High	High	High	High	High
Master Protein	C6T8F0	Glutamine synthetase OS=Glycine max OX=3847 GN=547620 PE=2 SV=1	0	255.806	77	19	234	6	356	39.2	5.39	698.39	19	9	9	1.293	1.204	0.826	1.1	1.185	1.016	0.974385	0.990546	0.998222	0.800599	0.918108	0.96067	40.9	102.6	99.2	157.3	1.45328e+08	1.71114e+08	1.78498e+08	1.87758e+08	4.29764e+08	4.51545e+08	5.72871e+08	4.15307e+08	4.06924e+08	7.19807e+08	3.78761e+08	6.58498e+08	High	High	High	High	High	High
Master Protein	I1KQX0	Aldedh domain-containing protein OS=Glycine max OX=3847 GN=100811544 PE=4 SV=2	0	255.788	69	21	249	4	541	58.2	7.72	672.7	21	8	18	1.356	1.565	0.744	0.976	1.073	0.84	0.946065	0.917431	0.947855	0.996239	0.991798	0.932779	84.4	103.2	96.3	116.1	1.38083e+08	1.30219e+08	1.5627e+08	1.4103e+08	1.68963e+08	1.7595e+08	1.5769e+08	1.75455e+08	1.51371e+08	1.94625e+08	1.90003e+08	1.72412e+08	High	High	High	High	High	High
Master Protein	I1KIP9	Uncharacterized protein OS=Glycine max OX=3847 GN=100780325 PE=3 SV=1	0	255.76	54	29	238	10	724	78.1	9.23	541.33	29	7	18	1.177	1.435	0.82	1.034	1.2	0.868	0.994062	0.962408	0.995512	0.967018	0.924982	0.973791	92.8	103.6	92.7	110.9	4.14694e+07	4.68697e+07	4.85195e+07	5.23389e+07	5.39175e+07	4.00539e+07	4.65358e+07	5.24534e+07	4.68302e+07	7.82099e+07	4.56103e+07	5.59939e+07	High	High	High	High	High	High
Master Protein	K7LKF5	Uncharacterized protein OS=Glycine max OX=3847 GN=100775953 PE=4 SV=1	0	255.702	58	25	236	11	504	55.7	5.39	620.5	25	10	0	0.804	0.822	1.016	0.834	0.816	1.102	0.68948	0.825918	0.882558	0.63848	0.693442	0.850564	112	114.6	104.1	69.4	2.25307e+07	2.27648e+07	2.13361e+07	2.3063e+07	1.79131e+07	2.32291e+07	2.09455e+07	1.50913e+07	2.80555e+07	1.22229e+07	1.39607e+07	1.77941e+07	High	High	High	High	High	High
Master Protein	I1KH61	Uncharacterized protein OS=Glycine max OX=3847 GN=100793968 PE=4 SV=1	0	255.533	38	29	210	5	901	103.1	6.96	485.77	29	7	24	1.229	1.463	0.865	1.018	1.207	0.793	0.997285	0.951884	0.990778	0.981606	0.91688	0.836911	92.3	114.4	88.7	104.6	4.26336e+07	6.22116e+07	3.63877e+07	4.38962e+07	5.69402e+07	5.28222e+07	3.4771e+07	4.09759e+07	5.3778e+07	4.60714e+07	4.8337e+07	5.38668e+07	High	High	High	High	High	Peak Found
Master Protein	A0A0R0J4X0	14_3_3 domain-containing protein OS=Glycine max OX=3847 GN=GLYMA_08G363800 PE=3 SV=1	0	255.48	71	18	259	1	257	29	4.75	593.53	18	8	11	1.189	2.599	0.622	0.975	2.519	0.416	0.994254	0.579028	0.859436	0.999616	0.000104664	0.000594181	74	77.5	71	177.5	1.56405e+07	2.17159e+07	1.63321e+07	2.36725e+07	1.71103e+07	1.68699e+07	1.51951e+07	1.56701e+07	1.97717e+07	3.91734e+07	3.49158e+07	5.09097e+07	Peak Found	Peak Found	Not Found	High	High	High
Master Protein	I1KXF9	Carbonic anhydrase OS=Glycine max OX=3847 GN=100808326 PE=3 SV=1	0	255.354	76	13	285	5	259	28.1	6.77	798.3	13	8	10	1.418	1.046	0.882	1.28	0.939	1.221	0.917628	0.941263	0.986228	0.107864	0.935624	0.57922	100.3	97.5	119.1	83.1	2.04973e+08	1.44056e+08	2.28785e+08	1.56077e+08	1.99298e+08	2.20654e+08	1.70852e+08	2.43369e+08	3.02148e+08	1.52976e+08	1.6981e+08	2.0455e+08	High	High	High	High	High	High
Master Protein	I1J7U9	3-phosphoshikimate 1-carboxyvinyltransferase OS=Glycine max OX=3847 GN=100789268 PE=3 SV=1	0	255.193	53	18	284	7	525	55.8	8.07	685.98	18	1	11	0.921	0.843	0.886	0.812	0.778	1.121	0.820021	0.804606	0.986228	0.384914	0.514104	0.798687	105.6	114.4	95.1	85	9.90838e+07	9.34683e+07	8.99036e+07	1.07339e+08	8.60881e+07	1.01233e+08	8.71262e+07	8.4176e+07	8.10718e+07	5.2441e+07	7.77603e+07	7.52371e+07	High	High	High	High	High	High
Master Protein	A0A0R4J4T7	Uncharacterized protein OS=Glycine max OX=3847 GN=100808812 PE=3 SV=1	0	255.18	34	14	301	5	576	64.3	8.48	894.93	14	13	10	0.743	0.447	1.888	1.487	0.92	1.623	0.477582	0.127803	0.0539064	0.00100043	0.91688	0.0265305	142.1	85.4	105.4	67	3.76985e+08	3.61173e+08	4.30426e+08	2.42787e+08	1.59839e+08	2.26574e+08	2.69054e+08	3.20082e+08	2.7966e+08	1.77789e+08	2.09111e+08	1.17131e+08	High	High	High	High	High	High
Master Protein	I1MJB3	Sulfurtransferase OS=Glycine max OX=3847 GN=100796802 PE=4 SV=1	0	255.17	58	19	142	4	384	42.3	7.56	463.11	19	15	0	1.618	1.643	0.847	1.031	1.641	0.677	0.860667	0.929961	0.998779	0.989478	0.469534	0.604146	181.8	77.4	63.2	77.6	3.95267e+06	7.20579e+06	7.1492e+06	5.76806e+06	3.04235e+06	2.86937e+06	2.09392e+06	4.84467e+06	2.48517e+06	7.79317e+06	3.05176e+06	2.1986e+06	High	High	High	High	High	High
Master Protein	C6TLV6	40S ribosomal protein S3a OS=Glycine max OX=3847 GN=100805519 PE=2 SV=1	0	255.164	59	18	403	2	261	29.6	9.8	808.98	18	1	4	1.138	1.689	0.818	0.937	1.372	0.697	0.979252	0.87564	0.995512	0.967018	0.592142	0.469493	87.5	103.7	92.9	115.8	8.84012e+07	1.28593e+08	8.60751e+07	1.04727e+08	1.2157e+08	7.81018e+07	6.93906e+07	1.01125e+08	9.38547e+07	6.40989e+07	1.16935e+08	1.64352e+08	High	High	High	High	High	High
Master Protein	I1NIU6	Cysteine synthase OS=Glycine max OX=3847 GN=100101909 PE=3 SV=1	0	255.153	71	17	217	3	323	34.7	5.47	720.5	17	20	14	1.044	1.043	1.028	1.14	1.09	0.987	0.92729	0.934359	0.883173	0.620745	0.983607	0.97589	106.3	87.6	100.5	105.5	9.12369e+07	6.46435e+07	7.75697e+07	6.39499e+07	6.67375e+07	6.35275e+07	6.11563e+07	7.33679e+07	7.43623e+07	7.77719e+07	7.51515e+07	7.70253e+07	High	High	High	High	High	High
Master Protein	K7KGN3	ACB domain-containing protein OS=Glycine max OX=3847 GN=100813240 PE=4 SV=1	0	255.103	56	26	228	1	658	71.6	5.31	507.33	26	3	0	1.225	0.01	1.363	3.145	0.01	100	0.996731	1.52446e-16	0.824133	8.43853e-06	2.32487e-16	2.5378e-16	167.6	47.8	184.7		770207	624257	228338	176356	564981	177982		849363	557254				High	High	Peak Found	Peak Found	High	Peak Found
Master Protein	K7MEB2	Methionine S-methyltransferase OS=Glycine max OX=3847 GN=100803724 PE=3 SV=1	0	255.033	35	28	177	1	1090	121.2	6.4	350.64	28	16	0																													Not Found	Not Found	Not Found	Not Found	Not Found	Not Found
Master Protein	K7MEB1	Methionine S-methyltransferase OS=Glycine max OX=3847 GN=100803724 PE=3 SV=1	0	255.033	34	28	177	1	1091	121.3	6.46	350.98	28	16	26	1.576	1.714	0.573	1.028	1.112	0.946	0.862523	0.922183	0.76555	0.980111	0.965028	0.997906	84.4	92.9	97	125.7	1.68029e+07	2.09043e+07	2.12786e+07	3.21673e+07	2.30011e+07	2.11192e+07	2.17094e+07	3.18316e+07	2.40385e+07	5.54561e+07	2.22042e+07	3.1138e+07	Not Found	Not Found	Not Found	High	Not Found	Peak Found
Master Protein	A0A0R0EKG7	BRO1 domain-containing protein OS=Glycine max OX=3847 GN=GLYMA_20G124000 PE=4 SV=1	0	255.027	38	28	212	5	896	100.4	6.44	523.74	28	20	23	1.749	2.029	0.609	0.989	1.142	0.872	0.717356	0.734313	0.765916	0.996259	0.957982	0.965309	96	104	102.8	97.2	3.3403e+07	3.59113e+07	3.72307e+07	3.1222e+07	3.9745e+07	3.89011e+07	3.2525e+07	3.97825e+07	3.84353e+07	3.35684e+07	3.63453e+07	5.04932e+07	High	High	High	High	High	High
Master Protein	I1NC18	Glutathione synthetase OS=Glycine max OX=3847 GN=GLYMA_19G237700 PE=3 SV=1	0	254.963	60	25	187	10	547	60.8	7.28	403.98	25	19	16	1.211	1.479	0.855	1.032	1.191	0.842	0.999218	0.943166	0.998222	0.967859	0.91688	0.932779	84.5	107.3	115.6	92.6	8.91507e+07	3.21522e+07	1.12348e+08	1.19592e+08	8.40967e+07	1.13222e+08	1.219e+08	1.21437e+08	1.30606e+08	1.24427e+08	8.45078e+07	9.76678e+07	High	High	High	High	High	High
Master Protein	A0A368UGQ6	Glucose-6-phosphate 1-epimerase OS=Glycine max OX=3847 GN=GLYMA_17G061300 PE=3 SV=1	0	254.694	75	19	197	6	321	36	6.13	580.96	19		0	1.179	1.237	0.704	0.913	0.947	0.952	0.991503	0.997958	0.921868	0.946067	0.938505	0.985117	69.7	115	107	108.3	1.0663e+07	6.67821e+06	6.31864e+06	9.24092e+06	1.16375e+07	1.10107e+07	9.88785e+06	1.02453e+07	1.44885e+07	7.44526e+06	1.03683e+07	1.3498e+07	High	High	High	High	High	High
Master Protein	I1J717	Proteasome subunit alpha type OS=Glycine max OX=3847 GN=100807110 PE=3 SV=1	0	254.657	66	14	279	2	235	25.6	5.68	883.02	14	1	2	0.874	1.077	1.102	0.959	0.992	0.936	0.80408	0.940982	0.782422	0.994467	0.97962	0.999009	107.2	100.4	92.8	99.6	2.4575e+07	2.18969e+07	2.39142e+07	1.76654e+07	2.23855e+07	2.39088e+07	1.54266e+07	2.29362e+07	2.0692e+07	4.08196e+07	2.22209e+07	1.23088e+07	High	High	High	High	High	High
Master Protein	C6THA9	NAD(P)-bd_dom domain-containing protein OS=Glycine max OX=3847 GN=100790835 PE=2 SV=1	0	254.336	71	19	322	1	348	39.1	8.13	798.61	19	15	22	1.261	1.076	0.664	0.743	0.804	0.948	0.987113	0.949133	0.85261	0.0656826	0.613633	0.997603	103.5	125.6	83.7	87.2	2.03334e+08	2.09696e+08	2.40868e+08	2.54354e+08	2.2494e+08	2.55286e+08	1.56379e+08	1.69426e+08	2.30116e+08	1.18421e+08	1.90998e+08	1.76673e+08	High	High	High	High	High	High
Master Protein	I1M4U9	NAD(P)-bd_dom domain-containing protein OS=Glycine max OX=3847 GN=100782830 PE=4 SV=1	0	254.336	71	19	319	1	348	39.1	8.13	781.04	19	13	0	2.22	4.263	0.467	1.037	1.92	0.517	0.653876	0.319505	0.698561	0.989478	0.181252	0.130296	41.4	88.7	92	177.8	1.06135e+06	735093	1.88432e+06	2.51096e+06	2.27211e+06	2.24145e+06	6.37581e+06	1.19823e+06	2.35591e+06		3.76581e+06	5.50675e+06	High	High	High	High	High	High
Master Protein	E9KNA6	SGF14a OS=Glycine max OX=3847 GN=547889 PE=2 SV=1	0	254.277	71	18	248	1	257	29	4.75	581.02	18	18	0		100	0.01	0.01	6.337	0.01		1.52446e-16	1.83145e-16	3.1435e-16	4.61631e-07	2.5378e-16		54.5		345.5				265896						1.68496e+06	533243	1.69764e+06	Not Found	Not Found	Not Found	Peak Found	Not Found	Not Found
Master Protein	I1KV97	Uncharacterized protein OS=Glycine max OX=3847 GN=100820094 PE=4 SV=1	0	254.064	39	28	208	7	901	103	7.05	491.09	28	8	1	2.05	2.994	0.361	1.005	1.386	0.773	0.618546	0.475803	0.183788	0.996018	0.713903	0.802485	82.8	87.4	84.9	144.9	4.50632e+06	5.54256e+06	4.83238e+06	4.91592e+06	6.33533e+06	5.09915e+06	4.95279e+06	4.46531e+06	8.68049e+06	8.45368e+06	5.84521e+06	9.51264e+06	High	Peak Found	Peak Found	High	High	High
Master Protein	I1JZD4	Uncharacterized protein OS=Glycine max OX=3847 GN=100779915 PE=4 SV=1	0	253.78	45	18	236	4	600	67.6	8.13	627.91	18	4	16	0.743	0.823	1.163	0.905	0.925	0.937	0.480049	0.799268	0.725986	0.906675	0.91969	0.998173	113.9	104.1	94.9	87.1	1.04046e+08	8.92745e+07	1.04648e+08	9.51127e+07	9.15624e+07	1.00613e+08	8.66835e+07	9.8493e+07	8.09583e+07	7.96044e+07	1.00589e+08	6.11449e+07	High	High	High	High	High	High
Master Protein	A0A0R0HHC1	Uncharacterized protein OS=Glycine max OX=3847 GN=GLYMA_12G224800 PE=4 SV=2	0	253.65	49	32	276	8	622	70.1	9.11	621.1	32		0	2.887	3.81	0.301	0.891	1.346	0.657	0.230465	0.207949	0.030879	0.906675	0.73383	0.396169	40.7	124.9	115.3	119	4.65372e+06	4.22539e+06	4.10123e+06	1.04779e+07	1.29545e+07	1.39505e+07	1.20082e+07	9.32183e+06	1.19577e+07	1.23436e+07	1.19789e+07	2.07237e+07	High	High	High	High	High	High
Master Protein	I1KUU0	Uncharacterized protein OS=Glycine max OX=3847 GN=100778935 PE=3 SV=1	0	253.616	52	25	234	6	574	61.2	6.43	542.19	25	8	0	0.837	0.952	1.08	1.013	1.161	0.879	0.82189	0.932739	0.909617	0.995007	0.957982	0.981329	107.3	96.6	99.5	96.7	1.00991e+07	6.66012e+06	7.36555e+06	6.62919e+06	8.69704e+06	5.9072e+06	7.25461e+06	6.68709e+06	6.82847e+06	4.20706e+06	6.63498e+06	7.82908e+06	High	High	High	High	High	High
Master Protein	K7KGN5	ACB domain-containing protein OS=Glycine max OX=3847 GN=100813240 PE=4 SV=1	0	253.448	56	26	235	1	648	70.5	5.4	526.26	26	3	25	1.168	1.086	0.771	0.845	0.781	1.099	0.991798	0.95244	0.972119	0.615047	0.525298	0.850564	110.8	110.6	92.9	85.8	9.33479e+07	8.67684e+07	7.68405e+07	9.10846e+07	8.32904e+07	8.6614e+07	8.33434e+07	6.56937e+07	7.27917e+07	5.68421e+07	6.71846e+07	7.09599e+07	Peak Found	High	High	High	High	Peak Found
Master Protein	I1KX25	Arf-GAP domain-containing protein OS=Glycine max OX=3847 GN=100785169 PE=4 SV=1	0	253.064	64	19	195	6	403	43.4	8.92	496.74	19	8	0	2.7	3.381	0.303	0.814	0.855	0.982	0.230465	0.387299	0.0474075	0.525616	0.786818	0.978396	81.8	138.5	107.3	72.3	1.82949e+07	1.44835e+07	1.20982e+07	1.76279e+07	2.45168e+07	2.52914e+07	1.89869e+07	2.05568e+07	1.81186e+07	1.27965e+07	2.088e+07	1.24967e+07	High	High	High	High	High	High
Master Protein	I1M0W3	SUMO-activating enzyme subunit OS=Glycine max OX=3847 GN=100794304 PE=3 SV=1	0	252.738	65	25	152	5	638	70.9	5.3	424.07	25	13	20	1.114	1.033	0.948	1.078	1.042	1.049	0.971445	0.934549	0.948259	0.874525	0.999952	0.932779	98.6	92.5	102.8	106.1	3.72836e+07	3.647e+07	3.01303e+07	3.41923e+07	3.63174e+07	2.61425e+07	4.02419e+07	3.80063e+07	3.23465e+07	3.92201e+07	3.89167e+07	4.7653e+07	High	High	High	High	High	High
Master Protein	A0A0R4J5A2	Peroxidase OS=Glycine max OX=3847 GN=GLYMA_15G128700 PE=3 SV=1	0	252.515	51	15	821	4	354	38.5	7.09	1718.17	15	15	0	0.765	0.326	1.583	1.099	0.51	2.07	0.533431	0.0182699	0.20448	0.804908	0.00237379	0.000179093	145.4	87.5	106.9	60.2	2.01476e+08	2.56184e+08	2.48428e+08	2.43446e+08	1.37162e+08	1.49404e+08	1.82549e+08	1.72064e+08	2.41411e+08	1.19331e+08	1.02836e+08	5.1061e+07	High	High	High	High	High	High
Master Protein	A0A368UGF3	Uncharacterized protein OS=Glycine max OX=3847 GN=GLYMA_20G191900 PE=4 SV=1	0	252.451	56	25	233	11	504	55.7	5.68	671.35	25		14	0.858	0.852	0.988	0.908	0.827	1.104	0.735209	0.839752	0.92794	0.918042	0.70012	0.846766	117.9	100.9	95.7	85.5	6.0154e+07	6.0553e+07	5.09101e+07	5.79792e+07	4.73196e+07	5.1452e+07	4.9307e+07	4.24905e+07	4.88142e+07	4.36115e+07	4.13098e+07	4.42343e+07	High	High	High	High	High	High
Master Protein	K7KWB0	Uncharacterized protein OS=Glycine max OX=3847 GN=100787451 PE=3 SV=1	0	252.352	53	17	211	7	488	51.8	6.89	608.89	17	6	0	0.63	0.601	1.414	0.923	0.88	1.131	0.428752	0.590065	0.602104	0.957754	0.86892	0.779915	124.7	101.2	83	91.1	1.10861e+07	6.66196e+06	1.37291e+07	8.99669e+06	9.31956e+06	7.92962e+06	7.30556e+06	8.86743e+06	7.37866e+06	1.04974e+07	8.09834e+06	6.66151e+06	High	High	High	High	High	High
[truncated: 8,458 more rows]
[truncated: 6 more columns]

## Sheet: TABLE S2
Table S2 - Proteins identified in leaf tissues of soybean plants under eCO2 and Fe-limitation
[truncated: 7,384 more rows]
[truncated: 7 more columns]

## Sheet: TABLE S3
Table S3 - The expression pattern of DEGs in the root tissues of soybean plants under eCO2 and Fe-limitation
[truncated: 707 more rows]

## Sheet: TABLE S4
Table S4 - The expression pattern of DEGs in the leaf tissues of soybean plants under eCO2 and Fe-limitation
[truncated: 591 more rows]
